# Supplementary material for: Transcriptome Analysis of Gelatin Seed Treatment as a Biostimulant of Cucumber Plant Growth
Source: Hindawi journal article supplement (doi:10.1155/2015/391234), 2015-01-01
Supplement: f1 [file 391234.f1.pdf]

**A**

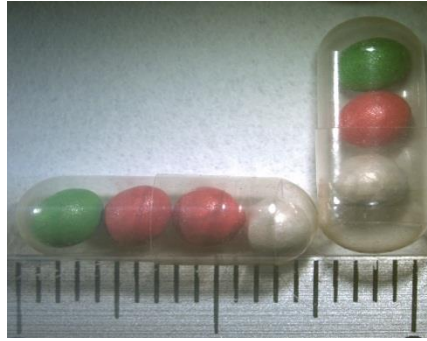

**B**

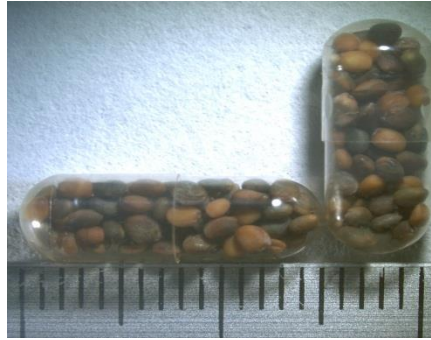

**C**

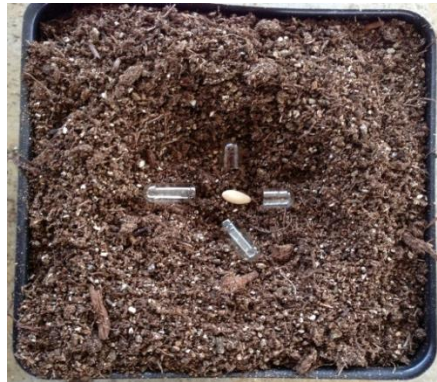

Supplementary Figure 1. Gelatin treatment of seeds. (A) Seed Encapsulation of pelleted seeds. (B) Seed Encapsulation of multiple seeds (C) Two gelatin capsules (shown in four halves) placed adjacent to a seed in a 4-inch pot.

## Supplementary Table 1 (Continued)

Supplementary Table 1: List of DEG in the first leaf (L1) and second leaf (L2) in first time point (T1), and second leaf (L2) in second time point (L2) between control and gelatin capsule treatment that show high correlation to the growth parameters (TLA, FW, PercentN). FDR p-value has been corrected by Benjamini-Hochberg's test. Mapman classification is used for gene ontology (GO). Annotation contains annotation from BLAST and the e-value, which is parameter that describes the number of hits one can "expect" to see by chance when searching a database. The module color refers to the module in which the gene is classified to.

Supplementary Table 1 (Continued)

| Differentially expressed | Module Color | Gene        | Fold change | Baggerley's test: FDR p-value correction | MapMan GO Classification | Annotations                                                                                | e-value   |
|--------------------------|--------------|-------------|-------------|------------------------------------------|--------------------------|--------------------------------------------------------------------------------------------|-----------|
| T1-L1                    | blue         | Csa4G431960 | 3.195       | 0                                        | Protein targeting        | Sigma factor binding protein 1 (SIB1)                                                      | 2.00E-14  |
| T1-L1                    | blue         | Csa2G072490 | 1.618       | 0.049                                    | Protein degradation      | Insulinase (Peptidase family M16) family protein                                           | 0         |
| T1-L1                    | blue         | Csa3G782680 | 1.16        | 1.20E-04                                 | Cell vesicle transport   | Syntaxin related protein 1 (SYR1)                                                          | 7.00E-123 |
| T1-L1                    | brown        | Csa4G124910 | 1.404       | 0.000006196                              | Miscellaneous            | Polyamine oxidase 2 (PAO2)                                                                 | 3.00E-228 |
| T1-L1                    | brown        | Csa3G120410 | 3.575       | 0.00005376                               | Transcription factor     | WRKY DNA-binding protein 53 (WRKY53)                                                       | 1.00E-102 |
| T1-L1                    | brown        | Csa7G448050 | NA          | Not assigned                             | unknown                  |                                                                                            |           |
| T1-L1                    | brown        | Csa2G247040 | 1.987       | 9.97E-04                                 | RNA binding              | Glycine rich protein 7 (GRP7)                                                              | 1.00E-58  |
| T1-L1                    | brown        | Csa4G000030 | 1.544       | 1.91E-03                                 | Not assigned             | DUF1005                                                                                    | 1.00E-118 |
| T1-L1                    | brown        | Csa6G109650 | -1.75       | 1.71E-05                                 | Miscellaneous            | Bi-functional inhibitor/lipid-transfer protein/seed storage 2S albumin superfamily protein | 6.00E-41  |
| T1-L1                    | brown        | Csa6G425840 | 3.098       | 6.03E-08                                 | Biotic stress            | Late embryogenesis abundant (LEA) hydroxyproline-rich glycoprotein family                  | 2.00E-65  |
| T1-L1                    | turquoise    | Csa7G047970 | 2.18        | 0.0009962                                | Transport                | MATE efflux family protein                                                                 | 4.00E-205 |
| T1-L1                    | turquoise    | Csa5G207960 | 2.293       | 3.454E-10                                | Transcription factor     | Salt-inducible zinc finger 1 (SZF1)                                                        | 1.00E-116 |
| T1-L1                    | turquoise    | Csa6G194150 | 5.147       | 1.779E-09                                | Cell wall                | Expansin A4 (EXPA4)                                                                        | 2.00E-137 |
| T1-L1                    | turquoise    | Csa2G355030 | 1.363       | 4.70E-03                                 | Transcription factor     | MYB domain protein 77 (MYB77)                                                              | 4.00E-115 |
| T1-L1                    | turquoise    | Csa7G398090 | 1.705       | 0.041                                    | Development              | Senescence-associated gene 21 (SAG21)                                                      | 2.00E-20  |
| T1-L1                    | yellow       | Csa6G118330 | 1.98        | 4.437E-10                                | Amino acid metabolism    | Embryo defective 1017 (emb1075)                                                            | 7.00E-235 |
| T1-L1                    | yellow       | Csa5G623650 | 2.467       | 7.05E-03                                 | Not assigned             | unknown                                                                                    |           |
| T1-L2                    | blue         | Csa1G533620 | -2.242      | 5.36E-03                                 | Not assigned             | unknown                                                                                    |           |
| T1-L2                    | blue         | Csa6G517180 | 1.68        | 0.000001159                              | Miscellaneous            | alpha/beta-hydrolases superfamily protein                                                  | 1.00E-128 |
| T1-L2                    | blue         | Csa5G523190 | 5.13        | 0.00002257                               | Redox                    | Glutaredoxin                                                                               | 9.00E-41  |
| T1-L2                    | blue         | Csa3G016990 | 1.432       | 6.40E-03                                 | Development              | unknown                                                                                    | 1.00E-23  |
| T1-L2                    | turquoise    | Csa5G161900 | -2.457      | 1.80E-06                                 | Miscellaneous            | Plant invertase/pectin methylesterase inhibitor superfamily protein                        | 3.00E-24  |

Supplementary Table 1 (Continued)

|       |           |             |         |          |                      |                                                                                       |           |
|-------|-----------|-------------|---------|----------|----------------------|---------------------------------------------------------------------------------------|-----------|
| T1-L2 | turquoise | Csa1G569290 | 1.313   | 3.46E-10 | Abiotic stress       | A member of heat shock protein 90 (HSP90) gene family ( <i>Arabidopsis thaliana</i> ) | 0         |
| T1-L2 | turquoise | Csa1G569270 | 2.042   | 7.34E-05 | Protein synthesis    | Ribosomal protein L18e/L15 superfamily protein                                        | 0         |
| T2-L2 | blue      | Csa4G638480 | -71.384 | 1.63E-03 | Biotic stress        | ADR1-like 1 (ADR1-L1)                                                                 | 8.00E-257 |
| T2-L2 | blue      | Csa1G231530 | -5.347  | 1.18E-04 | Hormone metabolism   | Indole-3acetic acid inducible 12 (IAA12)                                              |           |
| T2-L2 | blue      | Csa5G139420 | -3.252  | 4.53E-05 | Protein degradation  | Prolyl oligo-peptidase family protein                                                 | 3.00E-69  |
| T2-L2 | blue      | Csa7G336450 | -3.105  | 5.63E-05 | Not assigned         | unknown                                                                               |           |
| T2-L2 | blue      | Csa6G517960 | -2.436  | 7.19E-06 | Development          | Squamosa promoter binding protein-like 8 (SPL8)                                       | 4.00E-162 |
| T2-L2 | blue      | Csa3G337350 | -2.409  | 5.31E-05 | Biotic stress        | MLP-like protein 34 (MLP34)                                                           | 2.00E-26  |
| T2-L2 | blue      | Csa1G524760 | -2.299  | 7.66E-05 | Hormone metabolism   | highly ABA-induced PP2C gene 2 (HAI2)                                                 |           |
| T2-L2 | blue      | Csa3G062590 | -2.236  | 2.65E-10 | Transcription factor | NAC domain transcription factor family                                                | 1.00E-50  |
| T2-L2 | blue      | Csa5G522970 | -2.079  | 4.50E-04 | Miscellaneous        | Beta-1,4-N-acetylglucosaminyltransferase family protein                               | 4.00E-144 |
| T2-L2 | blue      | Csa2G263940 | -2.007  | 7.86E-09 | Cell wall            | Proline-rich protein 4 (PRP4)                                                         | 6.00E-65  |
| T2-L2 | blue      | Csa2G357860 | -1.953  | 1.01E-06 | Not assigned         | unknown                                                                               |           |
| T2-L2 | blue      | Csa6G076800 | -1.921  | 8.36E-03 | Cell wall            | Fasciclin-like arabinogalactan protein 8 (FLA8)                                       | 2.00E-54  |
| T2-L2 | blue      | Csa6G448110 | -1.869  | 1.83E-05 | Transport            | Gamma tonoplast intrinsic protein (GAMMA-TIP)                                         | 2.00E-67  |
| T2-L2 | blue      | Csa3G073930 | -1.822  | 7.68E-04 | Protein degradation  | Small ubiquitin-like modifier 1 (SUMO1)                                               | 1.00E-32  |
| T2-L2 | blue      | Csa3G690300 | -1.686  | 4.28E-05 | Not assigned         | unknown                                                                               |           |
| T2-L2 | blue      | Csa7G108300 | -1.647  | 9.38E-06 | Cell wall            | Fasciclin-like arabinogalactan protein 1 (FLA1)                                       | 9.00E-70  |
| T2-L2 | blue      | Csa5G598070 | -1.634  | 1.24E-07 | Not assigned         | unknown                                                                               |           |
| T2-L2 | blue      | Csa1G420360 | -1.607  | 6.30E-03 | Biotic stress        | Cystein-rich secretory proteins, Antigen 5, and Pathogenesis-related 1 protein        |           |
| T2-L2 | blue      | Csa6G507370 | -1.596  | 8.96E-03 | Development          | Senescence 1 (SEN1)                                                                   | 5.00E-138 |
| T2-L2 | blue      | Csa1G073840 | -1.59   | 2.16E-03 | Glycolysis           | Phosphoglycerate/bisphosphoglycerate mutase family protein                            | 5.00E-91  |
| T2-L2 | blue      | Csa5G615830 | -1.576  | 1.20E-05 | Transport            | Transmembrane amino acid transporter family protein                                   | 1.00E-102 |
| T2-L2 | blue      | Csa6G487570 | -1.558  | 9.20E-04 | Transport            | General control non-repressible 5 (GCN5)                                              | 7.00E-122 |
| T2-L2 | blue      | Csa2G145880 | -1.522  | 4.76E-03 | Photosynthesis       | Serine hydroxymethyltransferase 4 (SHM4)                                              | 3.00E-137 |
| T2-L2 | blue      | Csa3G075990 | -1.49   | 8.18E-03 | Miscellaneous        | GDLS-like Lipase/Acylhydrolase superfamily protein                                    | 7.00E-17  |
| T2-L2 | blue      | Csa2G361590 | -1.274  | 3.12E-03 | Not assigned         | unknown                                                                               |           |
| T2-L2 | blue      | Csa2G036680 | -1.209  | 1.49E-03 | Polyamine metabolism | S-adenosylmethionine decarboxylase proenzyme                                          | 4.00E-165 |
| T2-L2 | blue      | Csa3G134910 | 1.136   | 6.18E-03 | Not assigned         | unknown                                                                               |           |



Supplementary Table 1 (Continued)

|       |      |             |       |             |                              |                                                               |           |
|-------|------|-------------|-------|-------------|------------------------------|---------------------------------------------------------------|-----------|
| T2-L2 | blue | Csa1G574970 | 1.827 | 1.18E-05    | Major CHO metabolism         | Hexokinase 2 (HXK2)                                           | 7.00E-51  |
| T2-L2 | blue | Csa4G618520 | 1.837 | 0.0001765   | Biodegradation of xenobiotic | UDP glycosyltransferase (UGT)                                 | 1.00E-132 |
| T2-L2 | blue | Csa2G003610 | 1.841 | 0.0003098   | Lipid metabolism             | Abnormal inflorescence meristem (AIM1)                        | 3.00E-294 |
| T2-L2 | blue | Csa3G730930 | 1.847 | 0.00004243  | Transport                    | Ammonium transporter 2 (AMT2)                                 | 8E-220    |
| T2-L2 | blue | Csa6G493850 | 1.86  | 1.50E-05    | Not assigned                 | unknown                                                       |           |
| T2-L2 | blue | Csa3G159420 | 1.871 | 1.61E-03    | Not assigned                 | unknown                                                       |           |
| T2-L2 | blue | Csa1G528610 | 1.874 | 0.00435     | Lipid metabolism             | Thylakoid membrane anion transporter 1 (ANTR1)                | 7.00E-236 |
| T2-L2 | blue | Csa1G181360 | 1.875 | 0.001947    | Transport                    | non-intrinsic ABC protein 9 (NAP9)                            | 3.00E-156 |
| T2-L2 | blue | Csa3G154410 | 2.05  | 1.63E-10    | Not assigned                 | unknown                                                       |           |
| T2-L2 | blue | Csa3G183950 | 2.092 | 0.0004285   | Abiotic stress               | Heat shock protein 83                                         | 0.00E+00  |
| T2-L2 | blue | Csa2G296090 | 2.143 | 2.44E-04    | Not assigned                 | unknown                                                       |           |
| T2-L2 | blue | Csa7G291720 | 2.169 | 0.006566    | Lipid metabolism             | Choline kinase                                                | 4.00E-133 |
| T2-L2 | blue | Csa2G427310 | 2.238 | 0.007581    | Transcription factor         | MYB domain protein 73 (MYB73)                                 | 1.00E-88  |
| T2-L2 | blue | Csa3G881750 | 2.24  | 0.009561    | Lipid metabolism             | PR5-like receptor kinase (PR5K)                               | 4.00E-154 |
| T2-L2 | blue | Csa5G589260 | 2.243 | 0           | Amino acid metabolism        | O-acetylserine(thiol) lyase (OAS-TL)                          | 4.00E-162 |
| T2-L2 | blue | Csa3G733350 | 2.317 | 0.00004435  | Cell organization            | RHO guanyl-nucleotide exchange factor 11 (ROPGEF11)           | 9.00E-41  |
| T2-L2 | blue | Csa2G004690 | 2.522 | 0.000004593 | Transcription factor         | Heat shock transcription factor C1 (HSFC1)                    | 5.00E-67  |
| T2-L2 | blue | Csa7G387690 | 2.631 | 0.000001654 | Transport                    | Sulfate transporter 3;1 (SULTR 3;1)                           | 3.00E-307 |
| T2-L2 | blue | Csa1G008520 | 2.771 | 0.00804     | Transport                    | Plasma membrane proton ATPase 4 (HA4)                         | 0.00E+00  |
| T2-L2 | blue | Csa6G514850 | 3.048 | 0.00009803  | Miscellaneous                | Cytochrome P450 family 77 subfamily B polypeptide 1 (CYP77B1) | 1.00E-241 |
| T2-L2 | blue | Csa5G604150 | 3.14  | 0.01        | Redox                        | Thioredoxin 2 (TRX2)                                          |           |
| T2-L2 | blue | Csa5G223070 | 3.216 | 0.003151    | Transcription factor         | WRKY DNA-binding protein 54 (WRKY54)                          | 3.00E-96  |
| T2-L2 | blue | Csa2G359890 | 3.289 | 3.70E-03    | Not assigned                 | unknown                                                       |           |
| T2-L2 | blue | Csa1G596520 | 3.4   | 0.0002165   | Protein degradation          | Cystein proteinases superfamily protein                       | 2.00E-168 |
| T2-L2 | blue | Csa7G395800 | 3.415 | 0.001823    | Miscellaneous                | Glutathione S-transferase phi 8 (GSTF8)                       | 3.00E-82  |
| T2-L2 | blue | Csa3G119700 | 3.575 | 0.00005376  | Transcription factor         | WRKY DNA-binding protein 53 (WRKY53)                          | 1.00E-102 |
| T2-L2 | blue | Csa6G381850 | 3.831 | 0.001156    | Transport                    | Amino acid permease 3 (AAP3)                                  | 2.00E-234 |
| T2-L2 | blue | Csa1G033160 | 4.495 | 0.006049    | Miscellaneous                | Glutathione S-transferase tau 9 (GSTU9)                       | 3.00E-68  |
| T2-L2 | blue | Csa6G486960 | 4.496 | 0.000002502 | Transcription factor         | WRKY DNA-binding protein 51 (WRKY51)                          | 1.00E-36  |
| T2-L2 | blue | Csa2G058620 | 5.345 | 0.003945    | Abiotic stress               | DNAJ heat shock N-terminal domain-containing protein          | 2.00E-137 |

Supplementary Table 1 (Continued)

|       |      |             |       |             |                              |                                                               |           |
|-------|------|-------------|-------|-------------|------------------------------|---------------------------------------------------------------|-----------|
| T2-L2 | blue | Csa1G574970 | 1.827 | 1.18E-05    | Major CHO metabolism         | Hexokinase 2 (HXK2)                                           | 7.00E-51  |
| T2-L2 | blue | Csa4G618520 | 1.837 | 0.0001765   | Biodegradation of xenobiotic | UDP glycosyltransferase (UGT)                                 | 1.00E-132 |
| T2-L2 | blue | Csa2G003610 | 1.841 | 0.0003098   | Lipid metabolism             | Abnormal inflorescence meristem (AIM1)                        | 3.00E-294 |
| T2-L2 | blue | Csa3G730930 | 1.847 | 0.00004243  | Transport                    | Ammonium transporter 2 (AMT2)                                 | 8E-220    |
| T2-L2 | blue | Csa6G493850 | 1.86  | 1.50E-05    | Not assigned                 | unknown                                                       |           |
| T2-L2 | blue | Csa3G159420 | 1.871 | 1.61E-03    | Not assigned                 | unknown                                                       |           |
| T2-L2 | blue | Csa1G528610 | 1.874 | 0.00435     | Lipid metabolism             | Thylakoid membrane anion transporter 1 (ANTR1)                | 7.00E-236 |
| T2-L2 | blue | Csa1G181360 | 1.875 | 0.001947    | Transport                    | non-intrinsic ABC protein 9 (NAP9)                            | 3.00E-156 |
| T2-L2 | blue | Csa3G154410 | 2.05  | 1.63E-10    | Not assigned                 | unknown                                                       |           |
| T2-L2 | blue | Csa3G183950 | 2.092 | 0.0004285   | Abiotic stress               | Heat shock protein 83                                         | 0.00E+00  |
| T2-L2 | blue | Csa2G296090 | 2.143 | 2.44E-04    | Not assigned                 | unknown                                                       |           |
| T2-L2 | blue | Csa7G291720 | 2.169 | 0.006566    | Lipid metabolism             | Choline kinase                                                | 4.00E-133 |
| T2-L2 | blue | Csa2G427310 | 2.238 | 0.007581    | Transcription factor         | MYB domain protein 73 (MYB73)                                 | 1.00E-88  |
| T2-L2 | blue | Csa3G881750 | 2.24  | 0.009561    | Lipid metabolism             | PR5-like receptor kinase (PR5K)                               | 4.00E-154 |
| T2-L2 | blue | Csa5G589260 | 2.243 | 0           | Amino acid metabolism        | O-acetylserine(thiol) lyase (OAS-TL)                          | 4.00E-162 |
| T2-L2 | blue | Csa3G733350 | 2.317 | 0.00004435  | Cell organization            | RHO guanyl-nucleotide exchange factor 11 (ROPGEF11)           | 9.00E-41  |
| T2-L2 | blue | Csa2G004690 | 2.522 | 0.000004593 | Transcription factor         | Heat shock transcription factor C1 (HSFC1)                    | 5.00E-67  |
| T2-L2 | blue | Csa7G387690 | 2.631 | 0.000001654 | Transport                    | Sulfate transporter 3;1 (SULTR 3;1)                           | 3.00E-307 |
| T2-L2 | blue | Csa1G008520 | 2.771 | 0.00804     | Transport                    | Plasma membrane proton ATPase 4 (HA4)                         | 0.00E+00  |
| T2-L2 | blue | Csa6G514850 | 3.048 | 0.00009803  | Miscellaneous                | Cytochrome P450 family 77 subfamily B polypeptide 1 (CYP77B1) | 1.00E-241 |
| T2-L2 | blue | Csa5G604150 | 3.14  | 0.01        | Redox                        | Thioredoxin 2 (TRX2)                                          |           |
| T2-L2 | blue | Csa5G223070 | 3.216 | 0.003151    | Transcription factor         | WRKY DNA-binding protein 54 (WRKY54)                          | 3.00E-96  |
| T2-L2 | blue | Csa2G359890 | 3.289 | 3.70E-03    | Not assigned                 | unknown                                                       |           |
| T2-L2 | blue | Csa1G596520 | 3.4   | 0.0002165   | Protein degradation          | Cystein proteinases superfamily protein                       | 2.00E-168 |
| T2-L2 | blue | Csa7G395800 | 3.415 | 0.001823    | Miscellaneous                | Glutathione S-transferase phi 8 (GSTF8)                       | 3.00E-82  |
| T2-L2 | blue | Csa3G119700 | 3.575 | 0.00005376  | Transcription factor         | WRKY DNA-binding protein 53 (WRKY53)                          | 1.00E-102 |
| T2-L2 | blue | Csa6G381850 | 3.831 | 0.001156    | Transport                    | Amino acid permease 3 (AAP3)                                  | 2.00E-234 |
| T2-L2 | blue | Csa1G033160 | 4.495 | 0.006049    | Miscellaneous                | Glutathione S-transferase tau 9 (GSTU9)                       | 3.00E-68  |
| T2-L2 | blue | Csa6G486960 | 4.496 | 0.000002502 | Transcription factor         | WRKY DNA-binding protein 51 (WRKY51)                          | 1.00E-36  |
| T2-L2 | blue | Csa2G058620 | 5.345 | 0.003945    | Abiotic stress               | DNAJ heat shock N-terminal domain-containing protein          | 2.00E-137 |

Supplementary Table 1 (Continued)

|       |      |             |       |             |                              |                                                               |           |
|-------|------|-------------|-------|-------------|------------------------------|---------------------------------------------------------------|-----------|
| T2-L2 | blue | Csa1G574970 | 1.827 | 1.18E-05    | Major CHO metabolism         | Hexokinase 2 (HXK2)                                           | 7.00E-51  |
| T2-L2 | blue | Csa4G618520 | 1.837 | 0.0001765   | Biodegradation of xenobiotic | UDP glycosyltransferase (UGT)                                 | 1.00E-132 |
| T2-L2 | blue | Csa2G003610 | 1.841 | 0.0003098   | Lipid metabolism             | Abnormal inflorescence meristem (AIM1)                        | 3.00E-294 |
| T2-L2 | blue | Csa3G730930 | 1.847 | 0.00004243  | Transport                    | Ammonium transporter 2 (AMT2)                                 | 8E-220    |
| T2-L2 | blue | Csa6G493850 | 1.86  | 1.50E-05    | Not assigned                 | unknown                                                       |           |
| T2-L2 | blue | Csa3G159420 | 1.871 | 1.61E-03    | Not assigned                 | unknown                                                       |           |
| T2-L2 | blue | Csa1G528610 | 1.874 | 0.00435     | Lipid metabolism             | Thylakoid membrane anion transporter 1 (ANTR1)                | 7.00E-236 |
| T2-L2 | blue | Csa1G181360 | 1.875 | 0.001947    | Transport                    | non-intrinsic ABC protein 9 (NAP9)                            | 3.00E-156 |
| T2-L2 | blue | Csa3G154410 | 2.05  | 1.63E-10    | Not assigned                 | unknown                                                       |           |
| T2-L2 | blue | Csa3G183950 | 2.092 | 0.0004285   | Abiotic stress               | Heat shock protein 83                                         | 0.00E+00  |
| T2-L2 | blue | Csa2G296090 | 2.143 | 2.44E-04    | Not assigned                 | unknown                                                       |           |
| T2-L2 | blue | Csa7G291720 | 2.169 | 0.006566    | Lipid metabolism             | Choline kinase                                                | 4.00E-133 |
| T2-L2 | blue | Csa2G427310 | 2.238 | 0.007581    | Transcription factor         | MYB domain protein 73 (MYB73)                                 | 1.00E-88  |
| T2-L2 | blue | Csa3G881750 | 2.24  | 0.009561    | Lipid metabolism             | PR5-like receptor kinase (PR5K)                               | 4.00E-154 |
| T2-L2 | blue | Csa5G589260 | 2.243 | 0           | Amino acid metabolism        | O-acetylserine(thiol) lyase (OAS-TL)                          | 4.00E-162 |
| T2-L2 | blue | Csa3G733350 | 2.317 | 0.00004435  | Cell organization            | RHO guanyl-nucleotide exchange factor 11 (ROPGEF11)           | 9.00E-41  |
| T2-L2 | blue | Csa2G004690 | 2.522 | 0.000004593 | Transcription factor         | Heat shock transcription factor C1 (HSFC1)                    | 5.00E-67  |
| T2-L2 | blue | Csa7G387690 | 2.631 | 0.000001654 | Transport                    | Sulfate transporter 3;1 (SULTR 3;1)                           | 3.00E-307 |
| T2-L2 | blue | Csa1G008520 | 2.771 | 0.00804     | Transport                    | Plasma membrane proton ATPase 4 (HA4)                         | 0.00E+00  |
| T2-L2 | blue | Csa6G514850 | 3.048 | 0.00009803  | Miscellaneous                | Cytochrome P450 family 77 subfamily B polypeptide 1 (CYP77B1) | 1.00E-241 |
| T2-L2 | blue | Csa5G604150 | 3.14  | 0.01        | Redox                        | Thioredoxin 2 (TRX2)                                          |           |
| T2-L2 | blue | Csa5G223070 | 3.216 | 0.003151    | Transcription factor         | WRKY DNA-binding protein 54 (WRKY54)                          | 3.00E-96  |
| T2-L2 | blue | Csa2G359890 | 3.289 | 3.70E-03    | Not assigned                 | unknown                                                       |           |
| T2-L2 | blue | Csa1G596520 | 3.4   | 0.0002165   | Protein degradation          | Cystein proteinases superfamily protein                       | 2.00E-168 |
| T2-L2 | blue | Csa7G395800 | 3.415 | 0.001823    | Miscellaneous                | Glutathione S-transferase phi 8 (GSTF8)                       | 3.00E-82  |
| T2-L2 | blue | Csa3G119700 | 3.575 | 0.00005376  | Transcription factor         | WRKY DNA-binding protein 53 (WRKY53)                          | 1.00E-102 |
| T2-L2 | blue | Csa6G381850 | 3.831 | 0.001156    | Transport                    | Amino acid permease 3 (AAP3)                                  | 2.00E-234 |
| T2-L2 | blue | Csa1G033160 | 4.495 | 0.006049    | Miscellaneous                | Glutathione S-transferase tau 9 (GSTU9)                       | 3.00E-68  |
| T2-L2 | blue | Csa6G486960 | 4.496 | 0.000002502 | Transcription factor         | WRKY DNA-binding protein 51 (WRKY51)                          | 1.00E-36  |
| T2-L2 | blue | Csa2G058620 | 5.345 | 0.003945    | Abiotic stress               | DNAJ heat shock N-terminal domain-containing protein          | 2.00E-137 |

Supplementary Table 1 (Continued)

|       |      |             |       |             |                              |                                                               |           |
|-------|------|-------------|-------|-------------|------------------------------|---------------------------------------------------------------|-----------|
| T2-L2 | blue | Csa1G574970 | 1.827 | 1.18E-05    | Major CHO metabolism         | Hexokinase 2 (HXK2)                                           | 7.00E-51  |
| T2-L2 | blue | Csa4G618520 | 1.837 | 0.0001765   | Biodegradation of xenobiotic | UDP glycosyltransferase (UGT)                                 | 1.00E-132 |
| T2-L2 | blue | Csa2G003610 | 1.841 | 0.0003098   | Lipid metabolism             | Abnormal inflorescence meristem (AIM1)                        | 3.00E-294 |
| T2-L2 | blue | Csa3G730930 | 1.847 | 0.00004243  | Transport                    | Ammonium transporter 2 (AMT2)                                 | 8E-220    |
| T2-L2 | blue | Csa6G493850 | 1.86  | 1.50E-05    | Not assigned                 | unknown                                                       |           |
| T2-L2 | blue | Csa3G159420 | 1.871 | 1.61E-03    | Not assigned                 | unknown                                                       |           |
| T2-L2 | blue | Csa1G528610 | 1.874 | 0.00435     | Lipid metabolism             | Thylakoid membrane anion transporter 1 (ANTR1)                | 7.00E-236 |
| T2-L2 | blue | Csa1G181360 | 1.875 | 0.001947    | Transport                    | non-intrinsic ABC protein 9 (NAP9)                            | 3.00E-156 |
| T2-L2 | blue | Csa3G154410 | 2.05  | 1.63E-10    | Not assigned                 | unknown                                                       |           |
| T2-L2 | blue | Csa3G183950 | 2.092 | 0.0004285   | Abiotic stress               | Heat shock protein 83                                         | 0.00E+00  |
| T2-L2 | blue | Csa2G296090 | 2.143 | 2.44E-04    | Not assigned                 | unknown                                                       |           |
| T2-L2 | blue | Csa7G291720 | 2.169 | 0.006566    | Lipid metabolism             | Choline kinase                                                | 4.00E-133 |
| T2-L2 | blue | Csa2G427310 | 2.238 | 0.007581    | Transcription factor         | MYB domain protein 73 (MYB73)                                 | 1.00E-88  |
| T2-L2 | blue | Csa3G881750 | 2.24  | 0.009561    | Lipid metabolism             | PR5-like receptor kinase (PR5K)                               | 4.00E-154 |
| T2-L2 | blue | Csa5G589260 | 2.243 | 0           | Amino acid metabolism        | O-acetylserine(thiol) lyase (OAS-TL)                          | 4.00E-162 |
| T2-L2 | blue | Csa3G733350 | 2.317 | 0.00004435  | Cell organization            | RHO guanyl-nucleotide exchange factor 11 (ROPGEF11)           | 9.00E-41  |
| T2-L2 | blue | Csa2G004690 | 2.522 | 0.000004593 | Transcription factor         | Heat shock transcription factor C1 (HSFC1)                    | 5.00E-67  |
| T2-L2 | blue | Csa7G387690 | 2.631 | 0.000001654 | Transport                    | Sulfate transporter 3;1 (SULTR 3;1)                           | 3.00E-307 |
| T2-L2 | blue | Csa1G008520 | 2.771 | 0.00804     | Transport                    | Plasma membrane proton ATPase 4 (HA4)                         | 0.00E+00  |
| T2-L2 | blue | Csa6G514850 | 3.048 | 0.00009803  | Miscellaneous                | Cytochrome P450 family 77 subfamily B polypeptide 1 (CYP77B1) | 1.00E-241 |
| T2-L2 | blue | Csa5G604150 | 3.14  | 0.01        | Redox                        | Thioredoxin 2 (TRX2)                                          |           |
| T2-L2 | blue | Csa5G223070 | 3.216 | 0.003151    | Transcription factor         | WRKY DNA-binding protein 54 (WRKY54)                          | 3.00E-96  |
| T2-L2 | blue | Csa2G359890 | 3.289 | 3.70E-03    | Not assigned                 | unknown                                                       |           |
| T2-L2 | blue | Csa1G596520 | 3.4   | 0.0002165   | Protein degradation          | Cystein proteinases superfamily protein                       | 2.00E-168 |
| T2-L2 | blue | Csa7G395800 | 3.415 | 0.001823    | Miscellaneous                | Glutathione S-transferase phi 8 (GSTF8)                       | 3.00E-82  |
| T2-L2 | blue | Csa3G119700 | 3.575 | 0.00005376  | Transcription factor         | WRKY DNA-binding protein 53 (WRKY53)                          | 1.00E-102 |
| T2-L2 | blue | Csa6G381850 | 3.831 | 0.001156    | Transport                    | Amino acid permease 3 (AAP3)                                  | 2.00E-234 |
| T2-L2 | blue | Csa1G033160 | 4.495 | 0.006049    | Miscellaneous                | Glutathione S-transferase tau 9 (GSTU9)                       | 3.00E-68  |
| T2-L2 | blue | Csa6G486960 | 4.496 | 0.000002502 | Transcription factor         | WRKY DNA-binding protein 51 (WRKY51)                          | 1.00E-36  |
| T2-L2 | blue | Csa2G058620 | 5.345 | 0.003945    | Abiotic stress               | DNAJ heat shock N-terminal domain-containing protein          | 2.00E-137 |

Supplementary Table 1 (Continued)

|       |      |             |       |             |                              |                                                               |           |
|-------|------|-------------|-------|-------------|------------------------------|---------------------------------------------------------------|-----------|
| T2-L2 | blue | Csa1G574970 | 1.827 | 1.18E-05    | Major CHO metabolism         | Hexokinase 2 (HXK2)                                           | 7.00E-51  |
| T2-L2 | blue | Csa4G618520 | 1.837 | 0.0001765   | Biodegradation of xenobiotic | UDP glycosyltransferase (UGT)                                 | 1.00E-132 |
| T2-L2 | blue | Csa2G003610 | 1.841 | 0.0003098   | Lipid metabolism             | Abnormal inflorescence meristem (AIM1)                        | 3.00E-294 |
| T2-L2 | blue | Csa3G730930 | 1.847 | 0.00004243  | Transport                    | Ammonium transporter 2 (AMT2)                                 | 8E-220    |
| T2-L2 | blue | Csa6G493850 | 1.86  | 1.50E-05    | Not assigned                 | unknown                                                       |           |
| T2-L2 | blue | Csa3G159420 | 1.871 | 1.61E-03    | Not assigned                 | unknown                                                       |           |
| T2-L2 | blue | Csa1G528610 | 1.874 | 0.00435     | Lipid metabolism             | Thylakoid membrane anion transporter 1 (ANTR1)                | 7.00E-236 |
| T2-L2 | blue | Csa1G181360 | 1.875 | 0.001947    | Transport                    | non-intrinsic ABC protein 9 (NAP9)                            | 3.00E-156 |
| T2-L2 | blue | Csa3G154410 | 2.05  | 1.63E-10    | Not assigned                 | unknown                                                       |           |
| T2-L2 | blue | Csa3G183950 | 2.092 | 0.0004285   | Abiotic stress               | Heat shock protein 83                                         | 0.00E+00  |
| T2-L2 | blue | Csa2G296090 | 2.143 | 2.44E-04    | Not assigned                 | unknown                                                       |           |
| T2-L2 | blue | Csa7G291720 | 2.169 | 0.006566    | Lipid metabolism             | Choline kinase                                                | 4.00E-133 |
| T2-L2 | blue | Csa2G427310 | 2.238 | 0.007581    | Transcription factor         | MYB domain protein 73 (MYB73)                                 | 1.00E-88  |
| T2-L2 | blue | Csa3G881750 | 2.24  | 0.009561    | Lipid metabolism             | PR5-like receptor kinase (PR5K)                               | 4.00E-154 |
| T2-L2 | blue | Csa5G589260 | 2.243 | 0           | Amino acid metabolism        | O-acetylserine(thiol) lyase (OAS-TL)                          | 4.00E-162 |
| T2-L2 | blue | Csa3G733350 | 2.317 | 0.00004435  | Cell organization            | RHO guanyl-nucleotide exchange factor 11 (ROPGEF11)           | 9.00E-41  |
| T2-L2 | blue | Csa2G004690 | 2.522 | 0.000004593 | Transcription factor         | Heat shock transcription factor C1 (HSFC1)                    | 5.00E-67  |
| T2-L2 | blue | Csa7G387690 | 2.631 | 0.000001654 | Transport                    | Sulfate transporter 3;1 (SULTR 3;1)                           | 3.00E-307 |
| T2-L2 | blue | Csa1G008520 | 2.771 | 0.00804     | Transport                    | Plasma membrane proton ATPase 4 (HA4)                         | 0.00E+00  |
| T2-L2 | blue | Csa6G514850 | 3.048 | 0.00009803  | Miscellaneous                | Cytochrome P450 family 77 subfamily B polypeptide 1 (CYP77B1) | 1.00E-241 |
| T2-L2 | blue | Csa5G604150 | 3.14  | 0.01        | Redox                        | Thioredoxin 2 (TRX2)                                          |           |
| T2-L2 | blue | Csa5G223070 | 3.216 | 0.003151    | Transcription factor         | WRKY DNA-binding protein 54 (WRKY54)                          | 3.00E-96  |
| T2-L2 | blue | Csa2G359890 | 3.289 | 3.70E-03    | Not assigned                 | unknown                                                       |           |
| T2-L2 | blue | Csa1G596520 | 3.4   | 0.0002165   | Protein degradation          | Cystein proteinases superfamily protein                       | 2.00E-168 |
| T2-L2 | blue | Csa7G395800 | 3.415 | 0.001823    | Miscellaneous                | Glutathione S-transferase phi 8 (GSTF8)                       | 3.00E-82  |
| T2-L2 | blue | Csa3G119700 | 3.575 | 0.00005376  | Transcription factor         | WRKY DNA-binding protein 53 (WRKY53)                          | 1.00E-102 |
| T2-L2 | blue | Csa6G381850 | 3.831 | 0.001156    | Transport                    | Amino acid permease 3 (AAP3)                                  | 2.00E-234 |
| T2-L2 | blue | Csa1G033160 | 4.495 | 0.006049    | Miscellaneous                | Glutathione S-transferase tau 9 (GSTU9)                       | 3.00E-68  |
| T2-L2 | blue | Csa6G486960 | 4.496 | 0.000002502 | Transcription factor         | WRKY DNA-binding protein 51 (WRKY51)                          | 1.00E-36  |
| T2-L2 | blue | Csa2G058620 | 5.345 | 0.003945    | Abiotic stress               | DNAJ heat shock N-terminal domain-containing protein          | 2.00E-137 |

Supplementary Table 1 (Continued)

|       |      |             |       |             |                              |                                                               |           |
|-------|------|-------------|-------|-------------|------------------------------|---------------------------------------------------------------|-----------|
| T2-L2 | blue | Csa1G574970 | 1.827 | 1.18E-05    | Major CHO metabolism         | Hexokinase 2 (HXK2)                                           | 7.00E-51  |
| T2-L2 | blue | Csa4G618520 | 1.837 | 0.0001765   | Biodegradation of xenobiotic | UDP glycosyltransferase (UGT)                                 | 1.00E-132 |
| T2-L2 | blue | Csa2G003610 | 1.841 | 0.0003098   | Lipid metabolism             | Abnormal inflorescence meristem (AIM1)                        | 3.00E-294 |
| T2-L2 | blue | Csa3G730930 | 1.847 | 0.00004243  | Transport                    | Ammonium transporter 2 (AMT2)                                 | 8E-220    |
| T2-L2 | blue | Csa6G493850 | 1.86  | 1.50E-05    | Not assigned                 | unknown                                                       |           |
| T2-L2 | blue | Csa3G159420 | 1.871 | 1.61E-03    | Not assigned                 | unknown                                                       |           |
| T2-L2 | blue | Csa1G528610 | 1.874 | 0.00435     | Lipid metabolism             | Thylakoid membrane anion transporter 1 (ANTR1)                | 7.00E-236 |
| T2-L2 | blue | Csa1G181360 | 1.875 | 0.001947    | Transport                    | non-intrinsic ABC protein 9 (NAP9)                            | 3.00E-156 |
| T2-L2 | blue | Csa3G154410 | 2.05  | 1.63E-10    | Not assigned                 | unknown                                                       |           |
| T2-L2 | blue | Csa3G183950 | 2.092 | 0.0004285   | Abiotic stress               | Heat shock protein 83                                         | 0.00E+00  |
| T2-L2 | blue | Csa2G296090 | 2.143 | 2.44E-04    | Not assigned                 | unknown                                                       |           |
| T2-L2 | blue | Csa7G291720 | 2.169 | 0.006566    | Lipid metabolism             | Choline kinase                                                | 4.00E-133 |
| T2-L2 | blue | Csa2G427310 | 2.238 | 0.007581    | Transcription factor         | MYB domain protein 73 (MYB73)                                 | 1.00E-88  |
| T2-L2 | blue | Csa3G881750 | 2.24  | 0.009561    | Lipid metabolism             | PR5-like receptor kinase (PR5K)                               | 4.00E-154 |
| T2-L2 | blue | Csa5G589260 | 2.243 | 0           | Amino acid metabolism        | O-acetylserine(thiol) lyase (OAS-TL)                          | 4.00E-162 |
| T2-L2 | blue | Csa3G733350 | 2.317 | 0.00004435  | Cell organization            | RHO guanyl-nucleotide exchange factor 11 (ROPGEF11)           | 9.00E-41  |
| T2-L2 | blue | Csa2G004690 | 2.522 | 0.000004593 | Transcription factor         | Heat shock transcription factor C1 (HSFC1)                    | 5.00E-67  |
| T2-L2 | blue | Csa7G387690 | 2.631 | 0.000001654 | Transport                    | Sulfate transporter 3;1 (SULTR 3;1)                           | 3.00E-307 |
| T2-L2 | blue | Csa1G008520 | 2.771 | 0.00804     | Transport                    | Plasma membrane proton ATPase 4 (HA4)                         | 0.00E+00  |
| T2-L2 | blue | Csa6G514850 | 3.048 | 0.00009803  | Miscellaneous                | Cytochrome P450 family 77 subfamily B polypeptide 1 (CYP77B1) | 1.00E-241 |
| T2-L2 | blue | Csa5G604150 | 3.14  | 0.01        | Redox                        | Thioredoxin 2 (TRX2)                                          |           |
| T2-L2 | blue | Csa5G223070 | 3.216 | 0.003151    | Transcription factor         | WRKY DNA-binding protein 54 (WRKY54)                          | 3.00E-96  |
| T2-L2 | blue | Csa2G359890 | 3.289 | 3.70E-03    | Not assigned                 | unknown                                                       |           |
| T2-L2 | blue | Csa1G596520 | 3.4   | 0.0002165   | Protein degradation          | Cystein proteinases superfamily protein                       | 2.00E-168 |
| T2-L2 | blue | Csa7G395800 | 3.415 | 0.001823    | Miscellaneous                | Glutathione S-transferase phi 8 (GSTF8)                       | 3.00E-82  |
| T2-L2 | blue | Csa3G119700 | 3.575 | 0.00005376  | Transcription factor         | WRKY DNA-binding protein 53 (WRKY53)                          | 1.00E-102 |
| T2-L2 | blue | Csa6G381850 | 3.831 | 0.001156    | Transport                    | Amino acid permease 3 (AAP3)                                  | 2.00E-234 |
| T2-L2 | blue | Csa1G033160 | 4.495 | 0.006049    | Miscellaneous                | Glutathione S-transferase tau 9 (GSTU9)                       | 3.00E-68  |
| T2-L2 | blue | Csa6G486960 | 4.496 | 0.000002502 | Transcription factor         | WRKY DNA-binding protein 51 (WRKY51)                          | 1.00E-36  |
| T2-L2 | blue | Csa2G058620 | 5.345 | 0.003945    | Abiotic stress               | DNAJ heat shock N-terminal domain-containing protein          | 2.00E-137 |

Supplementary Table 1 (Continued)

|       |      |             |       |             |                              |                                                               |           |
|-------|------|-------------|-------|-------------|------------------------------|---------------------------------------------------------------|-----------|
| T2-L2 | blue | Csa1G574970 | 1.827 | 1.18E-05    | Major CHO metabolism         | Hexokinase 2 (HXK2)                                           | 7.00E-51  |
| T2-L2 | blue | Csa4G618520 | 1.837 | 0.0001765   | Biodegradation of xenobiotic | UDP glycosyltransferase (UGT)                                 | 1.00E-132 |
| T2-L2 | blue | Csa2G003610 | 1.841 | 0.0003098   | Lipid metabolism             | Abnormal inflorescence meristem (AIM1)                        | 3.00E-294 |
| T2-L2 | blue | Csa3G730930 | 1.847 | 0.00004243  | Transport                    | Ammonium transporter 2 (AMT2)                                 | 8E-220    |
| T2-L2 | blue | Csa6G493850 | 1.86  | 1.50E-05    | Not assigned                 | unknown                                                       |           |
| T2-L2 | blue | Csa3G159420 | 1.871 | 1.61E-03    | Not assigned                 | unknown                                                       |           |
| T2-L2 | blue | Csa1G528610 | 1.874 | 0.00435     | Lipid metabolism             | Thylakoid membrane anion transporter 1 (ANTR1)                | 7.00E-236 |
| T2-L2 | blue | Csa1G181360 | 1.875 | 0.001947    | Transport                    | non-intrinsic ABC protein 9 (NAP9)                            | 3.00E-156 |
| T2-L2 | blue | Csa3G154410 | 2.05  | 1.63E-10    | Not assigned                 | unknown                                                       |           |
| T2-L2 | blue | Csa3G183950 | 2.092 | 0.0004285   | Abiotic stress               | Heat shock protein 83                                         | 0.00E+00  |
| T2-L2 | blue | Csa2G296090 | 2.143 | 2.44E-04    | Not assigned                 | unknown                                                       |           |
| T2-L2 | blue | Csa7G291720 | 2.169 | 0.006566    | Lipid metabolism             | Choline kinase                                                | 4.00E-133 |
| T2-L2 | blue | Csa2G427310 | 2.238 | 0.007581    | Transcription factor         | MYB domain protein 73 (MYB73)                                 | 1.00E-88  |
| T2-L2 | blue | Csa3G881750 | 2.24  | 0.009561    | Lipid metabolism             | PR5-like receptor kinase (PR5K)                               | 4.00E-154 |
| T2-L2 | blue | Csa5G589260 | 2.243 | 0           | Amino acid metabolism        | O-acetylserine(thiol) lyase (OAS-TL)                          | 4.00E-162 |
| T2-L2 | blue | Csa3G733350 | 2.317 | 0.00004435  | Cell organization            | RHO guanyl-nucleotide exchange factor 11 (ROPGEF11)           | 9.00E-41  |
| T2-L2 | blue | Csa2G004690 | 2.522 | 0.000004593 | Transcription factor         | Heat shock transcription factor C1 (HSFC1)                    | 5.00E-67  |
| T2-L2 | blue | Csa7G387690 | 2.631 | 0.000001654 | Transport                    | Sulfate transporter 3;1 (SULTR 3;1)                           | 3.00E-307 |
| T2-L2 | blue | Csa1G008520 | 2.771 | 0.00804     | Transport                    | Plasma membrane proton ATPase 4 (HA4)                         | 0.00E+00  |
| T2-L2 | blue | Csa6G514850 | 3.048 | 0.00009803  | Miscellaneous                | Cytochrome P450 family 77 subfamily B polypeptide 1 (CYP77B1) | 1.00E-241 |
| T2-L2 | blue | Csa5G604150 | 3.14  | 0.01        | Redox                        | Thioredoxin 2 (TRX2)                                          |           |
| T2-L2 | blue | Csa5G223070 | 3.216 | 0.003151    | Transcription factor         | WRKY DNA-binding protein 54 (WRKY54)                          | 3.00E-96  |
| T2-L2 | blue | Csa2G359890 | 3.289 | 3.70E-03    | Not assigned                 | unknown                                                       |           |
| T2-L2 | blue | Csa1G596520 | 3.4   | 0.0002165   | Protein degradation          | Cystein proteinases superfamily protein                       | 2.00E-168 |
| T2-L2 | blue | Csa7G395800 | 3.415 | 0.001823    | Miscellaneous                | Glutathione S-transferase phi 8 (GSTF8)                       | 3.00E-82  |
| T2-L2 | blue | Csa3G119700 | 3.575 | 0.00005376  | Transcription factor         | WRKY DNA-binding protein 53 (WRKY53)                          | 1.00E-102 |
| T2-L2 | blue | Csa6G381850 | 3.831 | 0.001156    | Transport                    | Amino acid permease 3 (AAP3)                                  | 2.00E-234 |
| T2-L2 | blue | Csa1G033160 | 4.495 | 0.006049    | Miscellaneous                | Glutathione S-transferase tau 9 (GSTU9)                       | 3.00E-68  |
| T2-L2 | blue | Csa6G486960 | 4.496 | 0.000002502 | Transcription factor         | WRKY DNA-binding protein 51 (WRKY51)                          | 1.00E-36  |
| T2-L2 | blue | Csa2G058620 | 5.345 | 0.003945    | Abiotic stress               | DNAJ heat shock N-terminal domain-containing protein          | 2.00E-137 |

Supplementary Table 1 (Continued)

|       |      |             |       |             |                              |                                                               |           |
|-------|------|-------------|-------|-------------|------------------------------|---------------------------------------------------------------|-----------|
| T2-L2 | blue | Csa1G574970 | 1.827 | 1.18E-05    | Major CHO metabolism         | Hexokinase 2 (HXK2)                                           | 7.00E-51  |
| T2-L2 | blue | Csa4G618520 | 1.837 | 0.0001765   | Biodegradation of xenobiotic | UDP glycosyltransferase (UGT)                                 | 1.00E-132 |
| T2-L2 | blue | Csa2G003610 | 1.841 | 0.0003098   | Lipid metabolism             | Abnormal inflorescence meristem (AIM1)                        | 3.00E-294 |
| T2-L2 | blue | Csa3G730930 | 1.847 | 0.00004243  | Transport                    | Ammonium transporter 2 (AMT2)                                 | 8E-220    |
| T2-L2 | blue | Csa6G493850 | 1.86  | 1.50E-05    | Not assigned                 | unknown                                                       |           |
| T2-L2 | blue | Csa3G159420 | 1.871 | 1.61E-03    | Not assigned                 | unknown                                                       |           |
| T2-L2 | blue | Csa1G528610 | 1.874 | 0.00435     | Lipid metabolism             | Thylakoid membrane anion transporter 1 (ANTR1)                | 7.00E-236 |
| T2-L2 | blue | Csa1G181360 | 1.875 | 0.001947    | Transport                    | non-intrinsic ABC protein 9 (NAP9)                            | 3.00E-156 |
| T2-L2 | blue | Csa3G154410 | 2.05  | 1.63E-10    | Not assigned                 | unknown                                                       |           |
| T2-L2 | blue | Csa3G183950 | 2.092 | 0.0004285   | Abiotic stress               | Heat shock protein 83                                         | 0.00E+00  |
| T2-L2 | blue | Csa2G296090 | 2.143 | 2.44E-04    | Not assigned                 | unknown                                                       |           |
| T2-L2 | blue | Csa7G291720 | 2.169 | 0.006566    | Lipid metabolism             | Choline kinase                                                | 4.00E-133 |
| T2-L2 | blue | Csa2G427310 | 2.238 | 0.007581    | Transcription factor         | MYB domain protein 73 (MYB73)                                 | 1.00E-88  |
| T2-L2 | blue | Csa3G881750 | 2.24  | 0.009561    | Lipid metabolism             | PR5-like receptor kinase (PR5K)                               | 4.00E-154 |
| T2-L2 | blue | Csa5G589260 | 2.243 | 0           | Amino acid metabolism        | O-acetylserine(thiol) lyase (OAS-TL)                          | 4.00E-162 |
| T2-L2 | blue | Csa3G733350 | 2.317 | 0.00004435  | Cell organization            | RHO guanyl-nucleotide exchange factor 11 (ROPGEF11)           | 9.00E-41  |
| T2-L2 | blue | Csa2G004690 | 2.522 | 0.000004593 | Transcription factor         | Heat shock transcription factor C1 (HSFC1)                    | 5.00E-67  |
| T2-L2 | blue | Csa7G387690 | 2.631 | 0.000001654 | Transport                    | Sulfate transporter 3;1 (SULTR 3;1)                           | 3.00E-307 |
| T2-L2 | blue | Csa1G008520 | 2.771 | 0.00804     | Transport                    | Plasma membrane proton ATPase 4 (HA4)                         | 0.00E+00  |
| T2-L2 | blue | Csa6G514850 | 3.048 | 0.00009803  | Miscellaneous                | Cytochrome P450 family 77 subfamily B polypeptide 1 (CYP77B1) | 1.00E-241 |
| T2-L2 | blue | Csa5G604150 | 3.14  | 0.01        | Redox                        | Thioredoxin 2 (TRX2)                                          |           |
| T2-L2 | blue | Csa5G223070 | 3.216 | 0.003151    | Transcription factor         | WRKY DNA-binding protein 54 (WRKY54)                          | 3.00E-96  |
| T2-L2 | blue | Csa2G359890 | 3.289 | 3.70E-03    | Not assigned                 | unknown                                                       |           |
| T2-L2 | blue | Csa1G596520 | 3.4   | 0.0002165   | Protein degradation          | Cystein proteinases superfamily protein                       | 2.00E-168 |
| T2-L2 | blue | Csa7G395800 | 3.415 | 0.001823    | Miscellaneous                | Glutathione S-transferase phi 8 (GSTF8)                       | 3.00E-82  |
| T2-L2 | blue | Csa3G119700 | 3.575 | 0.00005376  | Transcription factor         | WRKY DNA-binding protein 53 (WRKY53)                          | 1.00E-102 |
| T2-L2 | blue | Csa6G381850 | 3.831 | 0.001156    | Transport                    | Amino acid permease 3 (AAP3)                                  | 2.00E-234 |
| T2-L2 | blue | Csa1G033160 | 4.495 | 0.006049    | Miscellaneous                | Glutathione S-transferase tau 9 (GSTU9)                       | 3.00E-68  |
| T2-L2 | blue | Csa6G486960 | 4.496 | 0.000002502 | Transcription factor         | WRKY DNA-binding protein 51 (WRKY51)                          | 1.00E-36  |
| T2-L2 | blue | Csa2G058620 | 5.345 | 0.003945    | Abiotic stress               | DNAJ heat shock N-terminal domain-containing protein          | 2.00E-137 |



Supplementary Table 1 (Continued)

|       |      |             |       |             |                              |                                                               |           |
|-------|------|-------------|-------|-------------|------------------------------|---------------------------------------------------------------|-----------|
| T2-L2 | blue | Csa1G574970 | 1.827 | 1.18E-05    | Major CHO metabolism         | Hexokinase 2 (HXK2)                                           | 7.00E-51  |
| T2-L2 | blue | Csa4G618520 | 1.837 | 0.0001765   | Biodegradation of xenobiotic | UDP glycosyltransferase (UGT)                                 | 1.00E-132 |
| T2-L2 | blue | Csa2G003610 | 1.841 | 0.0003098   | Lipid metabolism             | Abnormal inflorescence meristem (AIM1)                        | 3.00E-294 |
| T2-L2 | blue | Csa3G730930 | 1.847 | 0.00004243  | Transport                    | Ammonium transporter 2 (AMT2)                                 | 8E-220    |
| T2-L2 | blue | Csa6G493850 | 1.86  | 1.50E-05    | Not assigned                 | unknown                                                       |           |
| T2-L2 | blue | Csa3G159420 | 1.871 | 1.61E-03    | Not assigned                 | unknown                                                       |           |
| T2-L2 | blue | Csa1G528610 | 1.874 | 0.00435     | Lipid metabolism             | Thylakoid membrane anion transporter 1 (ANTR1)                | 7.00E-236 |
| T2-L2 | blue | Csa1G181360 | 1.875 | 0.001947    | Transport                    | non-intrinsic ABC protein 9 (NAP9)                            | 3.00E-156 |
| T2-L2 | blue | Csa3G154410 | 2.05  | 1.63E-10    | Not assigned                 | unknown                                                       |           |
| T2-L2 | blue | Csa3G183950 | 2.092 | 0.0004285   | Abiotic stress               | Heat shock protein 83                                         | 0.00E+00  |
| T2-L2 | blue | Csa2G296090 | 2.143 | 2.44E-04    | Not assigned                 | unknown                                                       |           |
| T2-L2 | blue | Csa7G291720 | 2.169 | 0.006566    | Lipid metabolism             | Choline kinase                                                | 4.00E-133 |
| T2-L2 | blue | Csa2G427310 | 2.238 | 0.007581    | Transcription factor         | MYB domain protein 73 (MYB73)                                 | 1.00E-88  |
| T2-L2 | blue | Csa3G881750 | 2.24  | 0.009561    | Lipid metabolism             | PR5-like receptor kinase (PR5K)                               | 4.00E-154 |
| T2-L2 | blue | Csa5G589260 | 2.243 | 0           | Amino acid metabolism        | O-acetylserine(thiol) lyase (OAS-TL)                          | 4.00E-162 |
| T2-L2 | blue | Csa3G733350 | 2.317 | 0.00004435  | Cell organization            | RHO guanyl-nucleotide exchange factor 11 (ROPGEF11)           | 9.00E-41  |
| T2-L2 | blue | Csa2G004690 | 2.522 | 0.000004593 | Transcription factor         | Heat shock transcription factor C1 (HSFC1)                    | 5.00E-67  |
| T2-L2 | blue | Csa7G387690 | 2.631 | 0.000001654 | Transport                    | Sulfate transporter 3;1 (SULTR 3;1)                           | 3.00E-307 |
| T2-L2 | blue | Csa1G008520 | 2.771 | 0.00804     | Transport                    | Plasma membrane proton ATPase 4 (HA4)                         | 0.00E+00  |
| T2-L2 | blue | Csa6G514850 | 3.048 | 0.00009803  | Miscellaneous                | Cytochrome P450 family 77 subfamily B polypeptide 1 (CYP77B1) | 1.00E-241 |
| T2-L2 | blue | Csa5G604150 | 3.14  | 0.01        | Redox                        | Thioredoxin 2 (TRX2)                                          |           |
| T2-L2 | blue | Csa5G223070 | 3.216 | 0.003151    | Transcription factor         | WRKY DNA-binding protein 54 (WRKY54)                          | 3.00E-96  |
| T2-L2 | blue | Csa2G359890 | 3.289 | 3.70E-03    | Not assigned                 | unknown                                                       |           |
| T2-L2 | blue | Csa1G596520 | 3.4   | 0.0002165   | Protein degradation          | Cystein proteinases superfamily protein                       | 2.00E-168 |
| T2-L2 | blue | Csa7G395800 | 3.415 | 0.001823    | Miscellaneous                | Glutathione S-transferase phi 8 (GSTF8)                       | 3.00E-82  |
| T2-L2 | blue | Csa3G119700 | 3.575 | 0.00005376  | Transcription factor         | WRKY DNA-binding protein 53 (WRKY53)                          | 1.00E-102 |
| T2-L2 | blue | Csa6G381850 | 3.831 | 0.001156    | Transport                    | Amino acid permease 3 (AAP3)                                  | 2.00E-234 |
| T2-L2 | blue | Csa1G033160 | 4.495 | 0.006049    | Miscellaneous                | Glutathione S-transferase tau 9 (GSTU9)                       | 3.00E-68  |
| T2-L2 | blue | Csa6G486960 | 4.496 | 0.000002502 | Transcription factor         | WRKY DNA-binding protein 51 (WRKY51)                          | 1.00E-36  |
| T2-L2 | blue | Csa2G058620 | 5.345 | 0.003945    | Abiotic stress               | DNAJ heat shock N-terminal domain-containing protein          | 2.00E-137 |

Supplementary Table 1 (Continued)

|       |      |             |       |             |                              |                                                               |           |
|-------|------|-------------|-------|-------------|------------------------------|---------------------------------------------------------------|-----------|
| T2-L2 | blue | Csa1G574970 | 1.827 | 1.18E-05    | Major CHO metabolism         | Hexokinase 2 (HXK2)                                           | 7.00E-51  |
| T2-L2 | blue | Csa4G618520 | 1.837 | 0.0001765   | Biodegradation of xenobiotic | UDP glycosyltransferase (UGT)                                 | 1.00E-132 |
| T2-L2 | blue | Csa2G003610 | 1.841 | 0.0003098   | Lipid metabolism             | Abnormal inflorescence meristem (AIM1)                        | 3.00E-294 |
| T2-L2 | blue | Csa3G730930 | 1.847 | 0.00004243  | Transport                    | Ammonium transporter 2 (AMT2)                                 | 8E-220    |
| T2-L2 | blue | Csa6G493850 | 1.86  | 1.50E-05    | Not assigned                 | unknown                                                       |           |
| T2-L2 | blue | Csa3G159420 | 1.871 | 1.61E-03    | Not assigned                 | unknown                                                       |           |
| T2-L2 | blue | Csa1G528610 | 1.874 | 0.00435     | Lipid metabolism             | Thylakoid membrane anion transporter 1 (ANTR1)                | 7.00E-236 |
| T2-L2 | blue | Csa1G181360 | 1.875 | 0.001947    | Transport                    | non-intrinsic ABC protein 9 (NAP9)                            | 3.00E-156 |
| T2-L2 | blue | Csa3G154410 | 2.05  | 1.63E-10    | Not assigned                 | unknown                                                       |           |
| T2-L2 | blue | Csa3G183950 | 2.092 | 0.0004285   | Abiotic stress               | Heat shock protein 83                                         | 0.00E+00  |
| T2-L2 | blue | Csa2G296090 | 2.143 | 2.44E-04    | Not assigned                 | unknown                                                       |           |
| T2-L2 | blue | Csa7G291720 | 2.169 | 0.006566    | Lipid metabolism             | Choline kinase                                                | 4.00E-133 |
| T2-L2 | blue | Csa2G427310 | 2.238 | 0.007581    | Transcription factor         | MYB domain protein 73 (MYB73)                                 | 1.00E-88  |
| T2-L2 | blue | Csa3G881750 | 2.24  | 0.009561    | Lipid metabolism             | PR5-like receptor kinase (PR5K)                               | 4.00E-154 |
| T2-L2 | blue | Csa5G589260 | 2.243 | 0           | Amino acid metabolism        | O-acetylserine(thiol) lyase (OAS-TL)                          | 4.00E-162 |
| T2-L2 | blue | Csa3G733350 | 2.317 | 0.00004435  | Cell organization            | RHO guanyl-nucleotide exchange factor 11 (ROPGEF11)           | 9.00E-41  |
| T2-L2 | blue | Csa2G004690 | 2.522 | 0.000004593 | Transcription factor         | Heat shock transcription factor C1 (HSFC1)                    | 5.00E-67  |
| T2-L2 | blue | Csa7G387690 | 2.631 | 0.000001654 | Transport                    | Sulfate transporter 3;1 (SULTR 3;1)                           | 3.00E-307 |
| T2-L2 | blue | Csa1G008520 | 2.771 | 0.00804     | Transport                    | Plasma membrane proton ATPase 4 (HA4)                         | 0.00E+00  |
| T2-L2 | blue | Csa6G514850 | 3.048 | 0.00009803  | Miscellaneous                | Cytochrome P450 family 77 subfamily B polypeptide 1 (CYP77B1) | 1.00E-241 |
| T2-L2 | blue | Csa5G604150 | 3.14  | 0.01        | Redox                        | Thioredoxin 2 (TRX2)                                          |           |
| T2-L2 | blue | Csa5G223070 | 3.216 | 0.003151    | Transcription factor         | WRKY DNA-binding protein 54 (WRKY54)                          | 3.00E-96  |
| T2-L2 | blue | Csa2G359890 | 3.289 | 3.70E-03    | Not assigned                 | unknown                                                       |           |
| T2-L2 | blue | Csa1G596520 | 3.4   | 0.0002165   | Protein degradation          | Cystein proteinases superfamily protein                       | 2.00E-168 |
| T2-L2 | blue | Csa7G395800 | 3.415 | 0.001823    | Miscellaneous                | Glutathione S-transferase phi 8 (GSTF8)                       | 3.00E-82  |
| T2-L2 | blue | Csa3G119700 | 3.575 | 0.00005376  | Transcription factor         | WRKY DNA-binding protein 53 (WRKY53)                          | 1.00E-102 |
| T2-L2 | blue | Csa6G381850 | 3.831 | 0.001156    | Transport                    | Amino acid permease 3 (AAP3)                                  | 2.00E-234 |
| T2-L2 | blue | Csa1G033160 | 4.495 | 0.006049    | Miscellaneous                | Glutathione S-transferase tau 9 (GSTU9)                       | 3.00E-68  |
| T2-L2 | blue | Csa6G486960 | 4.496 | 0.000002502 | Transcription factor         | WRKY DNA-binding protein 51 (WRKY51)                          | 1.00E-36  |
| T2-L2 | blue | Csa2G058620 | 5.345 | 0.003945    | Abiotic stress               | DNAJ heat shock N-terminal domain-containing protein          | 2.00E-137 |

Supplementary Table 1 (Continued)

|       |      |             |       |             |                              |                                                               |           |
|-------|------|-------------|-------|-------------|------------------------------|---------------------------------------------------------------|-----------|
| T2-L2 | blue | Csa1G574970 | 1.827 | 1.18E-05    | Major CHO metabolism         | Hexokinase 2 (HXK2)                                           | 7.00E-51  |
| T2-L2 | blue | Csa4G618520 | 1.837 | 0.0001765   | Biodegradation of xenobiotic | UDP glycosyltransferase (UGT)                                 | 1.00E-132 |
| T2-L2 | blue | Csa2G003610 | 1.841 | 0.0003098   | Lipid metabolism             | Abnormal inflorescence meristem (AIM1)                        | 3.00E-294 |
| T2-L2 | blue | Csa3G730930 | 1.847 | 0.00004243  | Transport                    | Ammonium transporter 2 (AMT2)                                 | 8E-220    |
| T2-L2 | blue | Csa6G493850 | 1.86  | 1.50E-05    | Not assigned                 | unknown                                                       |           |
| T2-L2 | blue | Csa3G159420 | 1.871 | 1.61E-03    | Not assigned                 | unknown                                                       |           |
| T2-L2 | blue | Csa1G528610 | 1.874 | 0.00435     | Lipid metabolism             | Thylakoid membrane anion transporter 1 (ANTR1)                | 7.00E-236 |
| T2-L2 | blue | Csa1G181360 | 1.875 | 0.001947    | Transport                    | non-intrinsic ABC protein 9 (NAP9)                            | 3.00E-156 |
| T2-L2 | blue | Csa3G154410 | 2.05  | 1.63E-10    | Not assigned                 | unknown                                                       |           |
| T2-L2 | blue | Csa3G183950 | 2.092 | 0.0004285   | Abiotic stress               | Heat shock protein 83                                         | 0.00E+00  |
| T2-L2 | blue | Csa2G296090 | 2.143 | 2.44E-04    | Not assigned                 | unknown                                                       |           |
| T2-L2 | blue | Csa7G291720 | 2.169 | 0.006566    | Lipid metabolism             | Choline kinase                                                | 4.00E-133 |
| T2-L2 | blue | Csa2G427310 | 2.238 | 0.007581    | Transcription factor         | MYB domain protein 73 (MYB73)                                 | 1.00E-88  |
| T2-L2 | blue | Csa3G881750 | 2.24  | 0.009561    | Lipid metabolism             | PR5-like receptor kinase (PR5K)                               | 4.00E-154 |
| T2-L2 | blue | Csa5G589260 | 2.243 | 0           | Amino acid metabolism        | O-acetylserine(thiol) lyase (OAS-TL)                          | 4.00E-162 |
| T2-L2 | blue | Csa3G733350 | 2.317 | 0.00004435  | Cell organization            | RHO guanyl-nucleotide exchange factor 11 (ROPGEF11)           | 9.00E-41  |
| T2-L2 | blue | Csa2G004690 | 2.522 | 0.000004593 | Transcription factor         | Heat shock transcription factor C1 (HSFC1)                    | 5.00E-67  |
| T2-L2 | blue | Csa7G387690 | 2.631 | 0.000001654 | Transport                    | Sulfate transporter 3;1 (SULTR 3;1)                           | 3.00E-307 |
| T2-L2 | blue | Csa1G008520 | 2.771 | 0.00804     | Transport                    | Plasma membrane proton ATPase 4 (HA4)                         | 0.00E+00  |
| T2-L2 | blue | Csa6G514850 | 3.048 | 0.00009803  | Miscellaneous                | Cytochrome P450 family 77 subfamily B polypeptide 1 (CYP77B1) | 1.00E-241 |
| T2-L2 | blue | Csa5G604150 | 3.14  | 0.01        | Redox                        | Thioredoxin 2 (TRX2)                                          |           |
| T2-L2 | blue | Csa5G223070 | 3.216 | 0.003151    | Transcription factor         | WRKY DNA-binding protein 54 (WRKY54)                          | 3.00E-96  |
| T2-L2 | blue | Csa2G359890 | 3.289 | 3.70E-03    | Not assigned                 | unknown                                                       |           |
| T2-L2 | blue | Csa1G596520 | 3.4   | 0.0002165   | Protein degradation          | Cystein proteinases superfamily protein                       | 2.00E-168 |
| T2-L2 | blue | Csa7G395800 | 3.415 | 0.001823    | Miscellaneous                | Glutathione S-transferase phi 8 (GSTF8)                       | 3.00E-82  |
| T2-L2 | blue | Csa3G119700 | 3.575 | 0.00005376  | Transcription factor         | WRKY DNA-binding protein 53 (WRKY53)                          | 1.00E-102 |
| T2-L2 | blue | Csa6G381850 | 3.831 | 0.001156    | Transport                    | Amino acid permease 3 (AAP3)                                  | 2.00E-234 |
| T2-L2 | blue | Csa1G033160 | 4.495 | 0.006049    | Miscellaneous                | Glutathione S-transferase tau 9 (GSTU9)                       | 3.00E-68  |
| T2-L2 | blue | Csa6G486960 | 4.496 | 0.000002502 | Transcription factor         | WRKY DNA-binding protein 51 (WRKY51)                          | 1.00E-36  |
| T2-L2 | blue | Csa2G058620 | 5.345 | 0.003945    | Abiotic stress               | DNAJ heat shock N-terminal domain-containing protein          | 2.00E-137 |

Supplementary Table 1 (Continued)

|       |      |             |       |             |                              |                                                               |           |
|-------|------|-------------|-------|-------------|------------------------------|---------------------------------------------------------------|-----------|
| T2-L2 | blue | Csa1G574970 | 1.827 | 1.18E-05    | Major CHO metabolism         | Hexokinase 2 (HXK2)                                           | 7.00E-51  |
| T2-L2 | blue | Csa4G618520 | 1.837 | 0.0001765   | Biodegradation of xenobiotic | UDP glycosyltransferase (UGT)                                 | 1.00E-132 |
| T2-L2 | blue | Csa2G003610 | 1.841 | 0.0003098   | Lipid metabolism             | Abnormal inflorescence meristem (AIM1)                        | 3.00E-294 |
| T2-L2 | blue | Csa3G730930 | 1.847 | 0.00004243  | Transport                    | Ammonium transporter 2 (AMT2)                                 | 8E-220    |
| T2-L2 | blue | Csa6G493850 | 1.86  | 1.50E-05    | Not assigned                 | unknown                                                       |           |
| T2-L2 | blue | Csa3G159420 | 1.871 | 1.61E-03    | Not assigned                 | unknown                                                       |           |
| T2-L2 | blue | Csa1G528610 | 1.874 | 0.00435     | Lipid metabolism             | Thylakoid membrane anion transporter 1 (ANTR1)                | 7.00E-236 |
| T2-L2 | blue | Csa1G181360 | 1.875 | 0.001947    | Transport                    | non-intrinsic ABC protein 9 (NAP9)                            | 3.00E-156 |
| T2-L2 | blue | Csa3G154410 | 2.05  | 1.63E-10    | Not assigned                 | unknown                                                       |           |
| T2-L2 | blue | Csa3G183950 | 2.092 | 0.0004285   | Abiotic stress               | Heat shock protein 83                                         | 0.00E+00  |
| T2-L2 | blue | Csa2G296090 | 2.143 | 2.44E-04    | Not assigned                 | unknown                                                       |           |
| T2-L2 | blue | Csa7G291720 | 2.169 | 0.006566    | Lipid metabolism             | Choline kinase                                                | 4.00E-133 |
| T2-L2 | blue | Csa2G427310 | 2.238 | 0.007581    | Transcription factor         | MYB domain protein 73 (MYB73)                                 | 1.00E-88  |
| T2-L2 | blue | Csa3G881750 | 2.24  | 0.009561    | Lipid metabolism             | PR5-like receptor kinase (PR5K)                               | 4.00E-154 |
| T2-L2 | blue | Csa5G589260 | 2.243 | 0           | Amino acid metabolism        | O-acetylserine(thiol) lyase (OAS-TL)                          | 4.00E-162 |
| T2-L2 | blue | Csa3G733350 | 2.317 | 0.00004435  | Cell organization            | RHO guanyl-nucleotide exchange factor 11 (ROPGEF11)           | 9.00E-41  |
| T2-L2 | blue | Csa2G004690 | 2.522 | 0.000004593 | Transcription factor         | Heat shock transcription factor C1 (HSFC1)                    | 5.00E-67  |
| T2-L2 | blue | Csa7G387690 | 2.631 | 0.000001654 | Transport                    | Sulfate transporter 3;1 (SULTR 3;1)                           | 3.00E-307 |
| T2-L2 | blue | Csa1G008520 | 2.771 | 0.00804     | Transport                    | Plasma membrane proton ATPase 4 (HA4)                         | 0.00E+00  |
| T2-L2 | blue | Csa6G514850 | 3.048 | 0.00009803  | Miscellaneous                | Cytochrome P450 family 77 subfamily B polypeptide 1 (CYP77B1) | 1.00E-241 |
| T2-L2 | blue | Csa5G604150 | 3.14  | 0.01        | Redox                        | Thioredoxin 2 (TRX2)                                          |           |
| T2-L2 | blue | Csa5G223070 | 3.216 | 0.003151    | Transcription factor         | WRKY DNA-binding protein 54 (WRKY54)                          | 3.00E-96  |
| T2-L2 | blue | Csa2G359890 | 3.289 | 3.70E-03    | Not assigned                 | unknown                                                       |           |
| T2-L2 | blue | Csa1G596520 | 3.4   | 0.0002165   | Protein degradation          | Cystein proteinases superfamily protein                       | 2.00E-168 |
| T2-L2 | blue | Csa7G395800 | 3.415 | 0.001823    | Miscellaneous                | Glutathione S-transferase phi 8 (GSTF8)                       | 3.00E-82  |
| T2-L2 | blue | Csa3G119700 | 3.575 | 0.00005376  | Transcription factor         | WRKY DNA-binding protein 53 (WRKY53)                          | 1.00E-102 |
| T2-L2 | blue | Csa6G381850 | 3.831 | 0.001156    | Transport                    | Amino acid permease 3 (AAP3)                                  | 2.00E-234 |
| T2-L2 | blue | Csa1G033160 | 4.495 | 0.006049    | Miscellaneous                | Glutathione S-transferase tau 9 (GSTU9)                       | 3.00E-68  |
| T2-L2 | blue | Csa6G486960 | 4.496 | 0.000002502 | Transcription factor         | WRKY DNA-binding protein 51 (WRKY51)                          | 1.00E-36  |
| T2-L2 | blue | Csa2G058620 | 5.345 | 0.003945    | Abiotic stress               | DNAJ heat shock N-terminal domain-containing protein          | 2.00E-137 |

Supplementary Table 1 (Continued)

|       |      |             |       |             |                              |                                                               |           |
|-------|------|-------------|-------|-------------|------------------------------|---------------------------------------------------------------|-----------|
| T2-L2 | blue | Csa1G574970 | 1.827 | 1.18E-05    | Major CHO metabolism         | Hexokinase 2 (HXK2)                                           | 7.00E-51  |
| T2-L2 | blue | Csa4G618520 | 1.837 | 0.0001765   | Biodegradation of xenobiotic | UDP glycosyltransferase (UGT)                                 | 1.00E-132 |
| T2-L2 | blue | Csa2G003610 | 1.841 | 0.0003098   | Lipid metabolism             | Abnormal inflorescence meristem (AIM1)                        | 3.00E-294 |
| T2-L2 | blue | Csa3G730930 | 1.847 | 0.00004243  | Transport                    | Ammonium transporter 2 (AMT2)                                 | 8E-220    |
| T2-L2 | blue | Csa6G493850 | 1.86  | 1.50E-05    | Not assigned                 | unknown                                                       |           |
| T2-L2 | blue | Csa3G159420 | 1.871 | 1.61E-03    | Not assigned                 | unknown                                                       |           |
| T2-L2 | blue | Csa1G528610 | 1.874 | 0.00435     | Lipid metabolism             | Thylakoid membrane anion transporter 1 (ANTR1)                | 7.00E-236 |
| T2-L2 | blue | Csa1G181360 | 1.875 | 0.001947    | Transport                    | non-intrinsic ABC protein 9 (NAP9)                            | 3.00E-156 |
| T2-L2 | blue | Csa3G154410 | 2.05  | 1.63E-10    | Not assigned                 | unknown                                                       |           |
| T2-L2 | blue | Csa3G183950 | 2.092 | 0.0004285   | Abiotic stress               | Heat shock protein 83                                         | 0.00E+00  |
| T2-L2 | blue | Csa2G296090 | 2.143 | 2.44E-04    | Not assigned                 | unknown                                                       |           |
| T2-L2 | blue | Csa7G291720 | 2.169 | 0.006566    | Lipid metabolism             | Choline kinase                                                | 4.00E-133 |
| T2-L2 | blue | Csa2G427310 | 2.238 | 0.007581    | Transcription factor         | MYB domain protein 73 (MYB73)                                 | 1.00E-88  |
| T2-L2 | blue | Csa3G881750 | 2.24  | 0.009561    | Lipid metabolism             | PR5-like receptor kinase (PR5K)                               | 4.00E-154 |
| T2-L2 | blue | Csa5G589260 | 2.243 | 0           | Amino acid metabolism        | O-acetylserine(thiol) lyase (OAS-TL)                          | 4.00E-162 |
| T2-L2 | blue | Csa3G733350 | 2.317 | 0.00004435  | Cell organization            | RHO guanyl-nucleotide exchange factor 11 (ROPGEF11)           | 9.00E-41  |
| T2-L2 | blue | Csa2G004690 | 2.522 | 0.000004593 | Transcription factor         | Heat shock transcription factor C1 (HSFC1)                    | 5.00E-67  |
| T2-L2 | blue | Csa7G387690 | 2.631 | 0.000001654 | Transport                    | Sulfate transporter 3;1 (SULTR 3;1)                           | 3.00E-307 |
| T2-L2 | blue | Csa1G008520 | 2.771 | 0.00804     | Transport                    | Plasma membrane proton ATPase 4 (HA4)                         | 0.00E+00  |
| T2-L2 | blue | Csa6G514850 | 3.048 | 0.00009803  | Miscellaneous                | Cytochrome P450 family 77 subfamily B polypeptide 1 (CYP77B1) | 1.00E-241 |
| T2-L2 | blue | Csa5G604150 | 3.14  | 0.01        | Redox                        | Thioredoxin 2 (TRX2)                                          |           |
| T2-L2 | blue | Csa5G223070 | 3.216 | 0.003151    | Transcription factor         | WRKY DNA-binding protein 54 (WRKY54)                          | 3.00E-96  |
| T2-L2 | blue | Csa2G359890 | 3.289 | 3.70E-03    | Not assigned                 | unknown                                                       |           |
| T2-L2 | blue | Csa1G596520 | 3.4   | 0.0002165   | Protein degradation          | Cystein proteinases superfamily protein                       | 2.00E-168 |
| T2-L2 | blue | Csa7G395800 | 3.415 | 0.001823    | Miscellaneous                | Glutathione S-transferase phi 8 (GSTF8)                       | 3.00E-82  |
| T2-L2 | blue | Csa3G119700 | 3.575 | 0.00005376  | Transcription factor         | WRKY DNA-binding protein 53 (WRKY53)                          | 1.00E-102 |
| T2-L2 | blue | Csa6G381850 | 3.831 | 0.001156    | Transport                    | Amino acid permease 3 (AAP3)                                  | 2.00E-234 |
| T2-L2 | blue | Csa1G033160 | 4.495 | 0.006049    | Miscellaneous                | Glutathione S-transferase tau 9 (GSTU9)                       | 3.00E-68  |
| T2-L2 | blue | Csa6G486960 | 4.496 | 0.000002502 | Transcription factor         | WRKY DNA-binding protein 51 (WRKY51)                          | 1.00E-36  |
| T2-L2 | blue | Csa2G058620 | 5.345 | 0.003945    | Abiotic stress               | DNAJ heat shock N-terminal domain-containing protein          | 2.00E-137 |

Supplementary Table 1 (Continued)

|       |      |             |       |             |                              |                                                               |           |
|-------|------|-------------|-------|-------------|------------------------------|---------------------------------------------------------------|-----------|
| T2-L2 | blue | Csa1G574970 | 1.827 | 1.18E-05    | Major CHO metabolism         | Hexokinase 2 (HXK2)                                           | 7.00E-51  |
| T2-L2 | blue | Csa4G618520 | 1.837 | 0.0001765   | Biodegradation of xenobiotic | UDP glycosyltransferase (UGT)                                 | 1.00E-132 |
| T2-L2 | blue | Csa2G003610 | 1.841 | 0.0003098   | Lipid metabolism             | Abnormal inflorescence meristem (AIM1)                        | 3.00E-294 |
| T2-L2 | blue | Csa3G730930 | 1.847 | 0.00004243  | Transport                    | Ammonium transporter 2 (AMT2)                                 | 8E-220    |
| T2-L2 | blue | Csa6G493850 | 1.86  | 1.50E-05    | Not assigned                 | unknown                                                       |           |
| T2-L2 | blue | Csa3G159420 | 1.871 | 1.61E-03    | Not assigned                 | unknown                                                       |           |
| T2-L2 | blue | Csa1G528610 | 1.874 | 0.00435     | Lipid metabolism             | Thylakoid membrane anion transporter 1 (ANTR1)                | 7.00E-236 |
| T2-L2 | blue | Csa1G181360 | 1.875 | 0.001947    | Transport                    | non-intrinsic ABC protein 9 (NAP9)                            | 3.00E-156 |
| T2-L2 | blue | Csa3G154410 | 2.05  | 1.63E-10    | Not assigned                 | unknown                                                       |           |
| T2-L2 | blue | Csa3G183950 | 2.092 | 0.0004285   | Abiotic stress               | Heat shock protein 83                                         | 0.00E+00  |
| T2-L2 | blue | Csa2G296090 | 2.143 | 2.44E-04    | Not assigned                 | unknown                                                       |           |
| T2-L2 | blue | Csa7G291720 | 2.169 | 0.006566    | Lipid metabolism             | Choline kinase                                                | 4.00E-133 |
| T2-L2 | blue | Csa2G427310 | 2.238 | 0.007581    | Transcription factor         | MYB domain protein 73 (MYB73)                                 | 1.00E-88  |
| T2-L2 | blue | Csa3G881750 | 2.24  | 0.009561    | Lipid metabolism             | PR5-like receptor kinase (PR5K)                               | 4.00E-154 |
| T2-L2 | blue | Csa5G589260 | 2.243 | 0           | Amino acid metabolism        | O-acetylserine(thiol) lyase (OAS-TL)                          | 4.00E-162 |
| T2-L2 | blue | Csa3G733350 | 2.317 | 0.00004435  | Cell organization            | RHO guanyl-nucleotide exchange factor 11 (ROPGEF11)           | 9.00E-41  |
| T2-L2 | blue | Csa2G004690 | 2.522 | 0.000004593 | Transcription factor         | Heat shock transcription factor C1 (HSFC1)                    | 5.00E-67  |
| T2-L2 | blue | Csa7G387690 | 2.631 | 0.000001654 | Transport                    | Sulfate transporter 3;1 (SULTR 3;1)                           | 3.00E-307 |
| T2-L2 | blue | Csa1G008520 | 2.771 | 0.00804     | Transport                    | Plasma membrane proton ATPase 4 (HA4)                         | 0.00E+00  |
| T2-L2 | blue | Csa6G514850 | 3.048 | 0.00009803  | Miscellaneous                | Cytochrome P450 family 77 subfamily B polypeptide 1 (CYP77B1) | 1.00E-241 |
| T2-L2 | blue | Csa5G604150 | 3.14  | 0.01        | Redox                        | Thioredoxin 2 (TRX2)                                          |           |
| T2-L2 | blue | Csa5G223070 | 3.216 | 0.003151    | Transcription factor         | WRKY DNA-binding protein 54 (WRKY54)                          | 3.00E-96  |
| T2-L2 | blue | Csa2G359890 | 3.289 | 3.70E-03    | Not assigned                 | unknown                                                       |           |
| T2-L2 | blue | Csa1G596520 | 3.4   | 0.0002165   | Protein degradation          | Cystein proteinases superfamily protein                       | 2.00E-168 |
| T2-L2 | blue | Csa7G395800 | 3.415 | 0.001823    | Miscellaneous                | Glutathione S-transferase phi 8 (GSTF8)                       | 3.00E-82  |
| T2-L2 | blue | Csa3G119700 | 3.575 | 0.00005376  | Transcription factor         | WRKY DNA-binding protein 53 (WRKY53)                          | 1.00E-102 |
| T2-L2 | blue | Csa6G381850 | 3.831 | 0.001156    | Transport                    | Amino acid permease 3 (AAP3)                                  | 2.00E-234 |
| T2-L2 | blue | Csa1G033160 | 4.495 | 0.006049    | Miscellaneous                | Glutathione S-transferase tau 9 (GSTU9)                       | 3.00E-68  |
| T2-L2 | blue | Csa6G486960 | 4.496 | 0.000002502 | Transcription factor         | WRKY DNA-binding protein 51 (WRKY51)                          | 1.00E-36  |
| T2-L2 | blue | Csa2G058620 | 5.345 | 0.003945    | Abiotic stress               | DNAJ heat shock N-terminal domain-containing protein          | 2.00E-137 |

Supplementary Table 1 (Continued)

|       |      |             |       |             |                              |                                                               |           |
|-------|------|-------------|-------|-------------|------------------------------|---------------------------------------------------------------|-----------|
| T2-L2 | blue | Csa1G574970 | 1.827 | 1.18E-05    | Major CHO metabolism         | Hexokinase 2 (HXK2)                                           | 7.00E-51  |
| T2-L2 | blue | Csa4G618520 | 1.837 | 0.0001765   | Biodegradation of xenobiotic | UDP glycosyltransferase (UGT)                                 | 1.00E-132 |
| T2-L2 | blue | Csa2G003610 | 1.841 | 0.0003098   | Lipid metabolism             | Abnormal inflorescence meristem (AIM1)                        | 3.00E-294 |
| T2-L2 | blue | Csa3G730930 | 1.847 | 0.00004243  | Transport                    | Ammonium transporter 2 (AMT2)                                 | 8E-220    |
| T2-L2 | blue | Csa6G493850 | 1.86  | 1.50E-05    | Not assigned                 | unknown                                                       |           |
| T2-L2 | blue | Csa3G159420 | 1.871 | 1.61E-03    | Not assigned                 | unknown                                                       |           |
| T2-L2 | blue | Csa1G528610 | 1.874 | 0.00435     | Lipid metabolism             | Thylakoid membrane anion transporter 1 (ANTR1)                | 7.00E-236 |
| T2-L2 | blue | Csa1G181360 | 1.875 | 0.001947    | Transport                    | non-intrinsic ABC protein 9 (NAP9)                            | 3.00E-156 |
| T2-L2 | blue | Csa3G154410 | 2.05  | 1.63E-10    | Not assigned                 | unknown                                                       |           |
| T2-L2 | blue | Csa3G183950 | 2.092 | 0.0004285   | Abiotic stress               | Heat shock protein 83                                         | 0.00E+00  |
| T2-L2 | blue | Csa2G296090 | 2.143 | 2.44E-04    | Not assigned                 | unknown                                                       |           |
| T2-L2 | blue | Csa7G291720 | 2.169 | 0.006566    | Lipid metabolism             | Choline kinase                                                | 4.00E-133 |
| T2-L2 | blue | Csa2G427310 | 2.238 | 0.007581    | Transcription factor         | MYB domain protein 73 (MYB73)                                 | 1.00E-88  |
| T2-L2 | blue | Csa3G881750 | 2.24  | 0.009561    | Lipid metabolism             | PR5-like receptor kinase (PR5K)                               | 4.00E-154 |
| T2-L2 | blue | Csa5G589260 | 2.243 | 0           | Amino acid metabolism        | O-acetylserine(thiol) lyase (OAS-TL)                          | 4.00E-162 |
| T2-L2 | blue | Csa3G733350 | 2.317 | 0.00004435  | Cell organization            | RHO guanyl-nucleotide exchange factor 11 (ROPGEF11)           | 9.00E-41  |
| T2-L2 | blue | Csa2G004690 | 2.522 | 0.000004593 | Transcription factor         | Heat shock transcription factor C1 (HSFC1)                    | 5.00E-67  |
| T2-L2 | blue | Csa7G387690 | 2.631 | 0.000001654 | Transport                    | Sulfate transporter 3;1 (SULTR 3;1)                           | 3.00E-307 |
| T2-L2 | blue | Csa1G008520 | 2.771 | 0.00804     | Transport                    | Plasma membrane proton ATPase 4 (HA4)                         | 0.00E+00  |
| T2-L2 | blue | Csa6G514850 | 3.048 | 0.00009803  | Miscellaneous                | Cytochrome P450 family 77 subfamily B polypeptide 1 (CYP77B1) | 1.00E-241 |
| T2-L2 | blue | Csa5G604150 | 3.14  | 0.01        | Redox                        | Thioredoxin 2 (TRX2)                                          |           |
| T2-L2 | blue | Csa5G223070 | 3.216 | 0.003151    | Transcription factor         | WRKY DNA-binding protein 54 (WRKY54)                          | 3.00E-96  |
| T2-L2 | blue | Csa2G359890 | 3.289 | 3.70E-03    | Not assigned                 | unknown                                                       |           |
| T2-L2 | blue | Csa1G596520 | 3.4   | 0.0002165   | Protein degradation          | Cystein proteinases superfamily protein                       | 2.00E-168 |
| T2-L2 | blue | Csa7G395800 | 3.415 | 0.001823    | Miscellaneous                | Glutathione S-transferase phi 8 (GSTF8)                       | 3.00E-82  |
| T2-L2 | blue | Csa3G119700 | 3.575 | 0.00005376  | Transcription factor         | WRKY DNA-binding protein 53 (WRKY53)                          | 1.00E-102 |
| T2-L2 | blue | Csa6G381850 | 3.831 | 0.001156    | Transport                    | Amino acid permease 3 (AAP3)                                  | 2.00E-234 |
| T2-L2 | blue | Csa1G033160 | 4.495 | 0.006049    | Miscellaneous                | Glutathione S-transferase tau 9 (GSTU9)                       | 3.00E-68  |
| T2-L2 | blue | Csa6G486960 | 4.496 | 0.000002502 | Transcription factor         | WRKY DNA-binding protein 51 (WRKY51)                          | 1.00E-36  |
| T2-L2 | blue | Csa2G058620 | 5.345 | 0.003945    | Abiotic stress               | DNAJ heat shock N-terminal domain-containing protein          | 2.00E-137 |

Supplementary Table 1 (Continued)

|       |      |             |       |             |                              |                                                               |           |
|-------|------|-------------|-------|-------------|------------------------------|---------------------------------------------------------------|-----------|
| T2-L2 | blue | Csa1G574970 | 1.827 | 1.18E-05    | Major CHO metabolism         | Hexokinase 2 (HXK2)                                           | 7.00E-51  |
| T2-L2 | blue | Csa4G618520 | 1.837 | 0.0001765   | Biodegradation of xenobiotic | UDP glycosyltransferase (UGT)                                 | 1.00E-132 |
| T2-L2 | blue | Csa2G003610 | 1.841 | 0.0003098   | Lipid metabolism             | Abnormal inflorescence meristem (AIM1)                        | 3.00E-294 |
| T2-L2 | blue | Csa3G730930 | 1.847 | 0.00004243  | Transport                    | Ammonium transporter 2 (AMT2)                                 | 8E-220    |
| T2-L2 | blue | Csa6G493850 | 1.86  | 1.50E-05    | Not assigned                 | unknown                                                       |           |
| T2-L2 | blue | Csa3G159420 | 1.871 | 1.61E-03    | Not assigned                 | unknown                                                       |           |
| T2-L2 | blue | Csa1G528610 | 1.874 | 0.00435     | Lipid metabolism             | Thylakoid membrane anion transporter 1 (ANTR1)                | 7.00E-236 |
| T2-L2 | blue | Csa1G181360 | 1.875 | 0.001947    | Transport                    | non-intrinsic ABC protein 9 (NAP9)                            | 3.00E-156 |
| T2-L2 | blue | Csa3G154410 | 2.05  | 1.63E-10    | Not assigned                 | unknown                                                       |           |
| T2-L2 | blue | Csa3G183950 | 2.092 | 0.0004285   | Abiotic stress               | Heat shock protein 83                                         | 0.00E+00  |
| T2-L2 | blue | Csa2G296090 | 2.143 | 2.44E-04    | Not assigned                 | unknown                                                       |           |
| T2-L2 | blue | Csa7G291720 | 2.169 | 0.006566    | Lipid metabolism             | Choline kinase                                                | 4.00E-133 |
| T2-L2 | blue | Csa2G427310 | 2.238 | 0.007581    | Transcription factor         | MYB domain protein 73 (MYB73)                                 | 1.00E-88  |
| T2-L2 | blue | Csa3G881750 | 2.24  | 0.009561    | Lipid metabolism             | PR5-like receptor kinase (PR5K)                               | 4.00E-154 |
| T2-L2 | blue | Csa5G589260 | 2.243 | 0           | Amino acid metabolism        | O-acetylserine(thiol) lyase (OAS-TL)                          | 4.00E-162 |
| T2-L2 | blue | Csa3G733350 | 2.317 | 0.00004435  | Cell organization            | RHO guanyl-nucleotide exchange factor 11 (ROPGEF11)           | 9.00E-41  |
| T2-L2 | blue | Csa2G004690 | 2.522 | 0.000004593 | Transcription factor         | Heat shock transcription factor C1 (HSFC1)                    | 5.00E-67  |
| T2-L2 | blue | Csa7G387690 | 2.631 | 0.000001654 | Transport                    | Sulfate transporter 3;1 (SULTR 3;1)                           | 3.00E-307 |
| T2-L2 | blue | Csa1G008520 | 2.771 | 0.00804     | Transport                    | Plasma membrane proton ATPase 4 (HA4)                         | 0.00E+00  |
| T2-L2 | blue | Csa6G514850 | 3.048 | 0.00009803  | Miscellaneous                | Cytochrome P450 family 77 subfamily B polypeptide 1 (CYP77B1) | 1.00E-241 |
| T2-L2 | blue | Csa5G604150 | 3.14  | 0.01        | Redox                        | Thioredoxin 2 (TRX2)                                          |           |
| T2-L2 | blue | Csa5G223070 | 3.216 | 0.003151    | Transcription factor         | WRKY DNA-binding protein 54 (WRKY54)                          | 3.00E-96  |
| T2-L2 | blue | Csa2G359890 | 3.289 | 3.70E-03    | Not assigned                 | unknown                                                       |           |
| T2-L2 | blue | Csa1G596520 | 3.4   | 0.0002165   | Protein degradation          | Cystein proteinases superfamily protein                       | 2.00E-168 |
| T2-L2 | blue | Csa7G395800 | 3.415 | 0.001823    | Miscellaneous                | Glutathione S-transferase phi 8 (GSTF8)                       | 3.00E-82  |
| T2-L2 | blue | Csa3G119700 | 3.575 | 0.00005376  | Transcription factor         | WRKY DNA-binding protein 53 (WRKY53)                          | 1.00E-102 |
| T2-L2 | blue | Csa6G381850 | 3.831 | 0.001156    | Transport                    | Amino acid permease 3 (AAP3)                                  | 2.00E-234 |
| T2-L2 | blue | Csa1G033160 | 4.495 | 0.006049    | Miscellaneous                | Glutathione S-transferase tau 9 (GSTU9)                       | 3.00E-68  |
| T2-L2 | blue | Csa6G486960 | 4.496 | 0.000002502 | Transcription factor         | WRKY DNA-binding protein 51 (WRKY51)                          | 1.00E-36  |
| T2-L2 | blue | Csa2G058620 | 5.345 | 0.003945    | Abiotic stress               | DNAJ heat shock N-terminal domain-containing protein          | 2.00E-137 |



Supplementary Table 1 (Continued)

|       |      |             |       |             |                              |                                                               |           |
|-------|------|-------------|-------|-------------|------------------------------|---------------------------------------------------------------|-----------|
| T2-L2 | blue | Csa1G574970 | 1.827 | 1.18E-05    | Major CHO metabolism         | Hexokinase 2 (HXK2)                                           | 7.00E-51  |
| T2-L2 | blue | Csa4G618520 | 1.837 | 0.0001765   | Biodegradation of xenobiotic | UDP glycosyltransferase (UGT)                                 | 1.00E-132 |
| T2-L2 | blue | Csa2G003610 | 1.841 | 0.0003098   | Lipid metabolism             | Abnormal inflorescence meristem (AIM1)                        | 3.00E-294 |
| T2-L2 | blue | Csa3G730930 | 1.847 | 0.00004243  | Transport                    | Ammonium transporter 2 (AMT2)                                 | 8E-220    |
| T2-L2 | blue | Csa6G493850 | 1.86  | 1.50E-05    | Not assigned                 | unknown                                                       |           |
| T2-L2 | blue | Csa3G159420 | 1.871 | 1.61E-03    | Not assigned                 | unknown                                                       |           |
| T2-L2 | blue | Csa1G528610 | 1.874 | 0.00435     | Lipid metabolism             | Thylakoid membrane anion transporter 1 (ANTR1)                | 7.00E-236 |
| T2-L2 | blue | Csa1G181360 | 1.875 | 0.001947    | Transport                    | non-intrinsic ABC protein 9 (NAP9)                            | 3.00E-156 |
| T2-L2 | blue | Csa3G154410 | 2.05  | 1.63E-10    | Not assigned                 | unknown                                                       |           |
| T2-L2 | blue | Csa3G183950 | 2.092 | 0.0004285   | Abiotic stress               | Heat shock protein 83                                         | 0.00E+00  |
| T2-L2 | blue | Csa2G296090 | 2.143 | 2.44E-04    | Not assigned                 | unknown                                                       |           |
| T2-L2 | blue | Csa7G291720 | 2.169 | 0.006566    | Lipid metabolism             | Choline kinase                                                | 4.00E-133 |
| T2-L2 | blue | Csa2G427310 | 2.238 | 0.007581    | Transcription factor         | MYB domain protein 73 (MYB73)                                 | 1.00E-88  |
| T2-L2 | blue | Csa3G881750 | 2.24  | 0.009561    | Lipid metabolism             | PR5-like receptor kinase (PR5K)                               | 4.00E-154 |
| T2-L2 | blue | Csa5G589260 | 2.243 | 0           | Amino acid metabolism        | O-acetylserine(thiol) lyase (OAS-TL)                          | 4.00E-162 |
| T2-L2 | blue | Csa3G733350 | 2.317 | 0.00004435  | Cell organization            | RHO guanyl-nucleotide exchange factor 11 (ROPGEF11)           | 9.00E-41  |
| T2-L2 | blue | Csa2G004690 | 2.522 | 0.000004593 | Transcription factor         | Heat shock transcription factor C1 (HSFC1)                    | 5.00E-67  |
| T2-L2 | blue | Csa7G387690 | 2.631 | 0.000001654 | Transport                    | Sulfate transporter 3;1 (SULTR 3;1)                           | 3.00E-307 |
| T2-L2 | blue | Csa1G008520 | 2.771 | 0.00804     | Transport                    | Plasma membrane proton ATPase 4 (HA4)                         | 0.00E+00  |
| T2-L2 | blue | Csa6G514850 | 3.048 | 0.00009803  | Miscellaneous                | Cytochrome P450 family 77 subfamily B polypeptide 1 (CYP77B1) | 1.00E-241 |
| T2-L2 | blue | Csa5G604150 | 3.14  | 0.01        | Redox                        | Thioredoxin 2 (TRX2)                                          |           |
| T2-L2 | blue | Csa5G223070 | 3.216 | 0.003151    | Transcription factor         | WRKY DNA-binding protein 54 (WRKY54)                          | 3.00E-96  |
| T2-L2 | blue | Csa2G359890 | 3.289 | 3.70E-03    | Not assigned                 | unknown                                                       |           |
| T2-L2 | blue | Csa1G596520 | 3.4   | 0.0002165   | Protein degradation          | Cystein proteinases superfamily protein                       | 2.00E-168 |
| T2-L2 | blue | Csa7G395800 | 3.415 | 0.001823    | Miscellaneous                | Glutathione S-transferase phi 8 (GSTF8)                       | 3.00E-82  |
| T2-L2 | blue | Csa3G119700 | 3.575 | 0.00005376  | Transcription factor         | WRKY DNA-binding protein 53 (WRKY53)                          | 1.00E-102 |
| T2-L2 | blue | Csa6G381850 | 3.831 | 0.001156    | Transport                    | Amino acid permease 3 (AAP3)                                  | 2.00E-234 |
| T2-L2 | blue | Csa1G033160 | 4.495 | 0.006049    | Miscellaneous                | Glutathione S-transferase tau 9 (GSTU9)                       | 3.00E-68  |
| T2-L2 | blue | Csa6G486960 | 4.496 | 0.000002502 | Transcription factor         | WRKY DNA-binding protein 51 (WRKY51)                          | 1.00E-36  |
| T2-L2 | blue | Csa2G058620 | 5.345 | 0.003945    | Abiotic stress               | DNAJ heat shock N-terminal domain-containing protein          | 2.00E-137 |

Supplementary Table 1 (Continued)

|       |      |             |       |             |                              |                                                               |           |
|-------|------|-------------|-------|-------------|------------------------------|---------------------------------------------------------------|-----------|
| T2-L2 | blue | Csa1G574970 | 1.827 | 1.18E-05    | Major CHO metabolism         | Hexokinase 2 (HXK2)                                           | 7.00E-51  |
| T2-L2 | blue | Csa4G618520 | 1.837 | 0.0001765   | Biodegradation of xenobiotic | UDP glycosyltransferase (UGT)                                 | 1.00E-132 |
| T2-L2 | blue | Csa2G003610 | 1.841 | 0.0003098   | Lipid metabolism             | Abnormal inflorescence meristem (AIM1)                        | 3.00E-294 |
| T2-L2 | blue | Csa3G730930 | 1.847 | 0.00004243  | Transport                    | Ammonium transporter 2 (AMT2)                                 | 8E-220    |
| T2-L2 | blue | Csa6G493850 | 1.86  | 1.50E-05    | Not assigned                 | unknown                                                       |           |
| T2-L2 | blue | Csa3G159420 | 1.871 | 1.61E-03    | Not assigned                 | unknown                                                       |           |
| T2-L2 | blue | Csa1G528610 | 1.874 | 0.00435     | Lipid metabolism             | Thylakoid membrane anion transporter 1 (ANTR1)                | 7.00E-236 |
| T2-L2 | blue | Csa1G181360 | 1.875 | 0.001947    | Transport                    | non-intrinsic ABC protein 9 (NAP9)                            | 3.00E-156 |
| T2-L2 | blue | Csa3G154410 | 2.05  | 1.63E-10    | Not assigned                 | unknown                                                       |           |
| T2-L2 | blue | Csa3G183950 | 2.092 | 0.0004285   | Abiotic stress               | Heat shock protein 83                                         | 0.00E+00  |
| T2-L2 | blue | Csa2G296090 | 2.143 | 2.44E-04    | Not assigned                 | unknown                                                       |           |
| T2-L2 | blue | Csa7G291720 | 2.169 | 0.006566    | Lipid metabolism             | Choline kinase                                                | 4.00E-133 |
| T2-L2 | blue | Csa2G427310 | 2.238 | 0.007581    | Transcription factor         | MYB domain protein 73 (MYB73)                                 | 1.00E-88  |
| T2-L2 | blue | Csa3G881750 | 2.24  | 0.009561    | Lipid metabolism             | PR5-like receptor kinase (PR5K)                               | 4.00E-154 |
| T2-L2 | blue | Csa5G589260 | 2.243 | 0           | Amino acid metabolism        | O-acetylserine(thiol) lyase (OAS-TL)                          | 4.00E-162 |
| T2-L2 | blue | Csa3G733350 | 2.317 | 0.00004435  | Cell organization            | RHO guanyl-nucleotide exchange factor 11 (ROPGEF11)           | 9.00E-41  |
| T2-L2 | blue | Csa2G004690 | 2.522 | 0.000004593 | Transcription factor         | Heat shock transcription factor C1 (HSFC1)                    | 5.00E-67  |
| T2-L2 | blue | Csa7G387690 | 2.631 | 0.000001654 | Transport                    | Sulfate transporter 3;1 (SULTR 3;1)                           | 3.00E-307 |
| T2-L2 | blue | Csa1G008520 | 2.771 | 0.00804     | Transport                    | Plasma membrane proton ATPase 4 (HA4)                         | 0.00E+00  |
| T2-L2 | blue | Csa6G514850 | 3.048 | 0.00009803  | Miscellaneous                | Cytochrome P450 family 77 subfamily B polypeptide 1 (CYP77B1) | 1.00E-241 |
| T2-L2 | blue | Csa5G604150 | 3.14  | 0.01        | Redox                        | Thioredoxin 2 (TRX2)                                          |           |
| T2-L2 | blue | Csa5G223070 | 3.216 | 0.003151    | Transcription factor         | WRKY DNA-binding protein 54 (WRKY54)                          | 3.00E-96  |
| T2-L2 | blue | Csa2G359890 | 3.289 | 3.70E-03    | Not assigned                 | unknown                                                       |           |
| T2-L2 | blue | Csa1G596520 | 3.4   | 0.0002165   | Protein degradation          | Cystein proteinases superfamily protein                       | 2.00E-168 |
| T2-L2 | blue | Csa7G395800 | 3.415 | 0.001823    | Miscellaneous                | Glutathione S-transferase phi 8 (GSTF8)                       | 3.00E-82  |
| T2-L2 | blue | Csa3G119700 | 3.575 | 0.00005376  | Transcription factor         | WRKY DNA-binding protein 53 (WRKY53)                          | 1.00E-102 |
| T2-L2 | blue | Csa6G381850 | 3.831 | 0.001156    | Transport                    | Amino acid permease 3 (AAP3)                                  | 2.00E-234 |
| T2-L2 | blue | Csa1G033160 | 4.495 | 0.006049    | Miscellaneous                | Glutathione S-transferase tau 9 (GSTU9)                       | 3.00E-68  |
| T2-L2 | blue | Csa6G486960 | 4.496 | 0.000002502 | Transcription factor         | WRKY DNA-binding protein 51 (WRKY51)                          | 1.00E-36  |
| T2-L2 | blue | Csa2G058620 | 5.345 | 0.003945    | Abiotic stress               | DNAJ heat shock N-terminal domain-containing protein          | 2.00E-137 |

Supplementary Table 1 (Continued)

|       |      |             |       |             |                              |                                                               |           |
|-------|------|-------------|-------|-------------|------------------------------|---------------------------------------------------------------|-----------|
| T2-L2 | blue | Csa1G574970 | 1.827 | 1.18E-05    | Major CHO metabolism         | Hexokinase 2 (HXK2)                                           | 7.00E-51  |
| T2-L2 | blue | Csa4G618520 | 1.837 | 0.0001765   | Biodegradation of xenobiotic | UDP glycosyltransferase (UGT)                                 | 1.00E-132 |
| T2-L2 | blue | Csa2G003610 | 1.841 | 0.0003098   | Lipid metabolism             | Abnormal inflorescence meristem (AIM1)                        | 3.00E-294 |
| T2-L2 | blue | Csa3G730930 | 1.847 | 0.00004243  | Transport                    | Ammonium transporter 2 (AMT2)                                 | 8E-220    |
| T2-L2 | blue | Csa6G493850 | 1.86  | 1.50E-05    | Not assigned                 | unknown                                                       |           |
| T2-L2 | blue | Csa3G159420 | 1.871 | 1.61E-03    | Not assigned                 | unknown                                                       |           |
| T2-L2 | blue | Csa1G528610 | 1.874 | 0.00435     | Lipid metabolism             | Thylakoid membrane anion transporter 1 (ANTR1)                | 7.00E-236 |
| T2-L2 | blue | Csa1G181360 | 1.875 | 0.001947    | Transport                    | non-intrinsic ABC protein 9 (NAP9)                            | 3.00E-156 |
| T2-L2 | blue | Csa3G154410 | 2.05  | 1.63E-10    | Not assigned                 | unknown                                                       |           |
| T2-L2 | blue | Csa3G183950 | 2.092 | 0.0004285   | Abiotic stress               | Heat shock protein 83                                         | 0.00E+00  |
| T2-L2 | blue | Csa2G296090 | 2.143 | 2.44E-04    | Not assigned                 | unknown                                                       |           |
| T2-L2 | blue | Csa7G291720 | 2.169 | 0.006566    | Lipid metabolism             | Choline kinase                                                | 4.00E-133 |
| T2-L2 | blue | Csa2G427310 | 2.238 | 0.007581    | Transcription factor         | MYB domain protein 73 (MYB73)                                 | 1.00E-88  |
| T2-L2 | blue | Csa3G881750 | 2.24  | 0.009561    | Lipid metabolism             | PR5-like receptor kinase (PR5K)                               | 4.00E-154 |
| T2-L2 | blue | Csa5G589260 | 2.243 | 0           | Amino acid metabolism        | O-acetylserine(thiol) lyase (OAS-TL)                          | 4.00E-162 |
| T2-L2 | blue | Csa3G733350 | 2.317 | 0.00004435  | Cell organization            | RHO guanyl-nucleotide exchange factor 11 (ROPGEF11)           | 9.00E-41  |
| T2-L2 | blue | Csa2G004690 | 2.522 | 0.000004593 | Transcription factor         | Heat shock transcription factor C1 (HSFC1)                    | 5.00E-67  |
| T2-L2 | blue | Csa7G387690 | 2.631 | 0.000001654 | Transport                    | Sulfate transporter 3;1 (SULTR 3;1)                           | 3.00E-307 |
| T2-L2 | blue | Csa1G008520 | 2.771 | 0.00804     | Transport                    | Plasma membrane proton ATPase 4 (HA4)                         | 0.00E+00  |
| T2-L2 | blue | Csa6G514850 | 3.048 | 0.00009803  | Miscellaneous                | Cytochrome P450 family 77 subfamily B polypeptide 1 (CYP77B1) | 1.00E-241 |
| T2-L2 | blue | Csa5G604150 | 3.14  | 0.01        | Redox                        | Thioredoxin 2 (TRX2)                                          |           |
| T2-L2 | blue | Csa5G223070 | 3.216 | 0.003151    | Transcription factor         | WRKY DNA-binding protein 54 (WRKY54)                          | 3.00E-96  |
| T2-L2 | blue | Csa2G359890 | 3.289 | 3.70E-03    | Not assigned                 | unknown                                                       |           |
| T2-L2 | blue | Csa1G596520 | 3.4   | 0.0002165   | Protein degradation          | Cystein proteinases superfamily protein                       | 2.00E-168 |
| T2-L2 | blue | Csa7G395800 | 3.415 | 0.001823    | Miscellaneous                | Glutathione S-transferase phi 8 (GSTF8)                       | 3.00E-82  |
| T2-L2 | blue | Csa3G119700 | 3.575 | 0.00005376  | Transcription factor         | WRKY DNA-binding protein 53 (WRKY53)                          | 1.00E-102 |
| T2-L2 | blue | Csa6G381850 | 3.831 | 0.001156    | Transport                    | Amino acid permease 3 (AAP3)                                  | 2.00E-234 |
| T2-L2 | blue | Csa1G033160 | 4.495 | 0.006049    | Miscellaneous                | Glutathione S-transferase tau 9 (GSTU9)                       | 3.00E-68  |
| T2-L2 | blue | Csa6G486960 | 4.496 | 0.000002502 | Transcription factor         | WRKY DNA-binding protein 51 (WRKY51)                          | 1.00E-36  |
| T2-L2 | blue | Csa2G058620 | 5.345 | 0.003945    | Abiotic stress               | DNAJ heat shock N-terminal domain-containing protein          | 2.00E-137 |

Supplementary Table 1 (Continued)

|       |      |             |       |             |                              |                                                               |           |
|-------|------|-------------|-------|-------------|------------------------------|---------------------------------------------------------------|-----------|
| T2-L2 | blue | Csa1G574970 | 1.827 | 1.18E-05    | Major CHO metabolism         | Hexokinase 2 (HXK2)                                           | 7.00E-51  |
| T2-L2 | blue | Csa4G618520 | 1.837 | 0.0001765   | Biodegradation of xenobiotic | UDP glycosyltransferase (UGT)                                 | 1.00E-132 |
| T2-L2 | blue | Csa2G003610 | 1.841 | 0.0003098   | Lipid metabolism             | Abnormal inflorescence meristem (AIM1)                        | 3.00E-294 |
| T2-L2 | blue | Csa3G730930 | 1.847 | 0.00004243  | Transport                    | Ammonium transporter 2 (AMT2)                                 | 8E-220    |
| T2-L2 | blue | Csa6G493850 | 1.86  | 1.50E-05    | Not assigned                 | unknown                                                       |           |
| T2-L2 | blue | Csa3G159420 | 1.871 | 1.61E-03    | Not assigned                 | unknown                                                       |           |
| T2-L2 | blue | Csa1G528610 | 1.874 | 0.00435     | Lipid metabolism             | Thylakoid membrane anion transporter 1 (ANTR1)                | 7.00E-236 |
| T2-L2 | blue | Csa1G181360 | 1.875 | 0.001947    | Transport                    | non-intrinsic ABC protein 9 (NAP9)                            | 3.00E-156 |
| T2-L2 | blue | Csa3G154410 | 2.05  | 1.63E-10    | Not assigned                 | unknown                                                       |           |
| T2-L2 | blue | Csa3G183950 | 2.092 | 0.0004285   | Abiotic stress               | Heat shock protein 83                                         | 0.00E+00  |
| T2-L2 | blue | Csa2G296090 | 2.143 | 2.44E-04    | Not assigned                 | unknown                                                       |           |
| T2-L2 | blue | Csa7G291720 | 2.169 | 0.006566    | Lipid metabolism             | Choline kinase                                                | 4.00E-133 |
| T2-L2 | blue | Csa2G427310 | 2.238 | 0.007581    | Transcription factor         | MYB domain protein 73 (MYB73)                                 | 1.00E-88  |
| T2-L2 | blue | Csa3G881750 | 2.24  | 0.009561    | Lipid metabolism             | PR5-like receptor kinase (PR5K)                               | 4.00E-154 |
| T2-L2 | blue | Csa5G589260 | 2.243 | 0           | Amino acid metabolism        | O-acetylserine(thiol) lyase (OAS-TL)                          | 4.00E-162 |
| T2-L2 | blue | Csa3G733350 | 2.317 | 0.00004435  | Cell organization            | RHO guanyl-nucleotide exchange factor 11 (ROPGEF11)           | 9.00E-41  |
| T2-L2 | blue | Csa2G004690 | 2.522 | 0.000004593 | Transcription factor         | Heat shock transcription factor C1 (HSFC1)                    | 5.00E-67  |
| T2-L2 | blue | Csa7G387690 | 2.631 | 0.000001654 | Transport                    | Sulfate transporter 3;1 (SULTR 3;1)                           | 3.00E-307 |
| T2-L2 | blue | Csa1G008520 | 2.771 | 0.00804     | Transport                    | Plasma membrane proton ATPase 4 (HA4)                         | 0.00E+00  |
| T2-L2 | blue | Csa6G514850 | 3.048 | 0.00009803  | Miscellaneous                | Cytochrome P450 family 77 subfamily B polypeptide 1 (CYP77B1) | 1.00E-241 |
| T2-L2 | blue | Csa5G604150 | 3.14  | 0.01        | Redox                        | Thioredoxin 2 (TRX2)                                          |           |
| T2-L2 | blue | Csa5G223070 | 3.216 | 0.003151    | Transcription factor         | WRKY DNA-binding protein 54 (WRKY54)                          | 3.00E-96  |
| T2-L2 | blue | Csa2G359890 | 3.289 | 3.70E-03    | Not assigned                 | unknown                                                       |           |
| T2-L2 | blue | Csa1G596520 | 3.4   | 0.0002165   | Protein degradation          | Cystein proteinases superfamily protein                       | 2.00E-168 |
| T2-L2 | blue | Csa7G395800 | 3.415 | 0.001823    | Miscellaneous                | Glutathione S-transferase phi 8 (GSTF8)                       | 3.00E-82  |
| T2-L2 | blue | Csa3G119700 | 3.575 | 0.00005376  | Transcription factor         | WRKY DNA-binding protein 53 (WRKY53)                          | 1.00E-102 |
| T2-L2 | blue | Csa6G381850 | 3.831 | 0.001156    | Transport                    | Amino acid permease 3 (AAP3)                                  | 2.00E-234 |
| T2-L2 | blue | Csa1G033160 | 4.495 | 0.006049    | Miscellaneous                | Glutathione S-transferase tau 9 (GSTU9)                       | 3.00E-68  |
| T2-L2 | blue | Csa6G486960 | 4.496 | 0.000002502 | Transcription factor         | WRKY DNA-binding protein 51 (WRKY51)                          | 1.00E-36  |
| T2-L2 | blue | Csa2G058620 | 5.345 | 0.003945    | Abiotic stress               | DNAJ heat shock N-terminal domain-containing protein          | 2.00E-137 |

Supplementary Table 1 (Continued)

|       |      |             |       |             |                              |                                                               |           |
|-------|------|-------------|-------|-------------|------------------------------|---------------------------------------------------------------|-----------|
| T2-L2 | blue | Csa1G574970 | 1.827 | 1.18E-05    | Major CHO metabolism         | Hexokinase 2 (HXK2)                                           | 7.00E-51  |
| T2-L2 | blue | Csa4G618520 | 1.837 | 0.0001765   | Biodegradation of xenobiotic | UDP glycosyltransferase (UGT)                                 | 1.00E-132 |
| T2-L2 | blue | Csa2G003610 | 1.841 | 0.0003098   | Lipid metabolism             | Abnormal inflorescence meristem (AIM1)                        | 3.00E-294 |
| T2-L2 | blue | Csa3G730930 | 1.847 | 0.00004243  | Transport                    | Ammonium transporter 2 (AMT2)                                 | 8E-220    |
| T2-L2 | blue | Csa6G493850 | 1.86  | 1.50E-05    | Not assigned                 | unknown                                                       |           |
| T2-L2 | blue | Csa3G159420 | 1.871 | 1.61E-03    | Not assigned                 | unknown                                                       |           |
| T2-L2 | blue | Csa1G528610 | 1.874 | 0.00435     | Lipid metabolism             | Thylakoid membrane anion transporter 1 (ANTR1)                | 7.00E-236 |
| T2-L2 | blue | Csa1G181360 | 1.875 | 0.001947    | Transport                    | non-intrinsic ABC protein 9 (NAP9)                            | 3.00E-156 |
| T2-L2 | blue | Csa3G154410 | 2.05  | 1.63E-10    | Not assigned                 | unknown                                                       |           |
| T2-L2 | blue | Csa3G183950 | 2.092 | 0.0004285   | Abiotic stress               | Heat shock protein 83                                         | 0.00E+00  |
| T2-L2 | blue | Csa2G296090 | 2.143 | 2.44E-04    | Not assigned                 | unknown                                                       |           |
| T2-L2 | blue | Csa7G291720 | 2.169 | 0.006566    | Lipid metabolism             | Choline kinase                                                | 4.00E-133 |
| T2-L2 | blue | Csa2G427310 | 2.238 | 0.007581    | Transcription factor         | MYB domain protein 73 (MYB73)                                 | 1.00E-88  |
| T2-L2 | blue | Csa3G881750 | 2.24  | 0.009561    | Lipid metabolism             | PR5-like receptor kinase (PR5K)                               | 4.00E-154 |
| T2-L2 | blue | Csa5G589260 | 2.243 | 0           | Amino acid metabolism        | O-acetylserine(thiol) lyase (OAS-TL)                          | 4.00E-162 |
| T2-L2 | blue | Csa3G733350 | 2.317 | 0.00004435  | Cell organization            | RHO guanyl-nucleotide exchange factor 11 (ROPGEF11)           | 9.00E-41  |
| T2-L2 | blue | Csa2G004690 | 2.522 | 0.000004593 | Transcription factor         | Heat shock transcription factor C1 (HSFC1)                    | 5.00E-67  |
| T2-L2 | blue | Csa7G387690 | 2.631 | 0.000001654 | Transport                    | Sulfate transporter 3;1 (SULTR 3;1)                           | 3.00E-307 |
| T2-L2 | blue | Csa1G008520 | 2.771 | 0.00804     | Transport                    | Plasma membrane proton ATPase 4 (HA4)                         | 0.00E+00  |
| T2-L2 | blue | Csa6G514850 | 3.048 | 0.00009803  | Miscellaneous                | Cytochrome P450 family 77 subfamily B polypeptide 1 (CYP77B1) | 1.00E-241 |
| T2-L2 | blue | Csa5G604150 | 3.14  | 0.01        | Redox                        | Thioredoxin 2 (TRX2)                                          |           |
| T2-L2 | blue | Csa5G223070 | 3.216 | 0.003151    | Transcription factor         | WRKY DNA-binding protein 54 (WRKY54)                          | 3.00E-96  |
| T2-L2 | blue | Csa2G359890 | 3.289 | 3.70E-03    | Not assigned                 | unknown                                                       |           |
| T2-L2 | blue | Csa1G596520 | 3.4   | 0.0002165   | Protein degradation          | Cystein proteinases superfamily protein                       | 2.00E-168 |
| T2-L2 | blue | Csa7G395800 | 3.415 | 0.001823    | Miscellaneous                | Glutathione S-transferase phi 8 (GSTF8)                       | 3.00E-82  |
| T2-L2 | blue | Csa3G119700 | 3.575 | 0.00005376  | Transcription factor         | WRKY DNA-binding protein 53 (WRKY53)                          | 1.00E-102 |
| T2-L2 | blue | Csa6G381850 | 3.831 | 0.001156    | Transport                    | Amino acid permease 3 (AAP3)                                  | 2.00E-234 |
| T2-L2 | blue | Csa1G033160 | 4.495 | 0.006049    | Miscellaneous                | Glutathione S-transferase tau 9 (GSTU9)                       | 3.00E-68  |
| T2-L2 | blue | Csa6G486960 | 4.496 | 0.000002502 | Transcription factor         | WRKY DNA-binding protein 51 (WRKY51)                          | 1.00E-36  |
| T2-L2 | blue | Csa2G058620 | 5.345 | 0.003945    | Abiotic stress               | DNAJ heat shock N-terminal domain-containing protein          | 2.00E-137 |

Supplementary Table 1 (Continued)

|       |      |             |       |             |                              |                                                               |           |
|-------|------|-------------|-------|-------------|------------------------------|---------------------------------------------------------------|-----------|
| T2-L2 | blue | Csa1G574970 | 1.827 | 1.18E-05    | Major CHO metabolism         | Hexokinase 2 (HXK2)                                           | 7.00E-51  |
| T2-L2 | blue | Csa4G618520 | 1.837 | 0.0001765   | Biodegradation of xenobiotic | UDP glycosyltransferase (UGT)                                 | 1.00E-132 |
| T2-L2 | blue | Csa2G003610 | 1.841 | 0.0003098   | Lipid metabolism             | Abnormal inflorescence meristem (AIM1)                        | 3.00E-294 |
| T2-L2 | blue | Csa3G730930 | 1.847 | 0.00004243  | Transport                    | Ammonium transporter 2 (AMT2)                                 | 8E-220    |
| T2-L2 | blue | Csa6G493850 | 1.86  | 1.50E-05    | Not assigned                 | unknown                                                       |           |
| T2-L2 | blue | Csa3G159420 | 1.871 | 1.61E-03    | Not assigned                 | unknown                                                       |           |
| T2-L2 | blue | Csa1G528610 | 1.874 | 0.00435     | Lipid metabolism             | Thylakoid membrane anion transporter 1 (ANTR1)                | 7.00E-236 |
| T2-L2 | blue | Csa1G181360 | 1.875 | 0.001947    | Transport                    | non-intrinsic ABC protein 9 (NAP9)                            | 3.00E-156 |
| T2-L2 | blue | Csa3G154410 | 2.05  | 1.63E-10    | Not assigned                 | unknown                                                       |           |
| T2-L2 | blue | Csa3G183950 | 2.092 | 0.0004285   | Abiotic stress               | Heat shock protein 83                                         | 0.00E+00  |
| T2-L2 | blue | Csa2G296090 | 2.143 | 2.44E-04    | Not assigned                 | unknown                                                       |           |
| T2-L2 | blue | Csa7G291720 | 2.169 | 0.006566    | Lipid metabolism             | Choline kinase                                                | 4.00E-133 |
| T2-L2 | blue | Csa2G427310 | 2.238 | 0.007581    | Transcription factor         | MYB domain protein 73 (MYB73)                                 | 1.00E-88  |
| T2-L2 | blue | Csa3G881750 | 2.24  | 0.009561    | Lipid metabolism             | PR5-like receptor kinase (PR5K)                               | 4.00E-154 |
| T2-L2 | blue | Csa5G589260 | 2.243 | 0           | Amino acid metabolism        | O-acetylserine(thiol) lyase (OAS-TL)                          | 4.00E-162 |
| T2-L2 | blue | Csa3G733350 | 2.317 | 0.00004435  | Cell organization            | RHO guanyl-nucleotide exchange factor 11 (ROPGEF11)           | 9.00E-41  |
| T2-L2 | blue | Csa2G004690 | 2.522 | 0.000004593 | Transcription factor         | Heat shock transcription factor C1 (HSFC1)                    | 5.00E-67  |
| T2-L2 | blue | Csa7G387690 | 2.631 | 0.000001654 | Transport                    | Sulfate transporter 3;1 (SULTR 3;1)                           | 3.00E-307 |
| T2-L2 | blue | Csa1G008520 | 2.771 | 0.00804     | Transport                    | Plasma membrane proton ATPase 4 (HA4)                         | 0.00E+00  |
| T2-L2 | blue | Csa6G514850 | 3.048 | 0.00009803  | Miscellaneous                | Cytochrome P450 family 77 subfamily B polypeptide 1 (CYP77B1) | 1.00E-241 |
| T2-L2 | blue | Csa5G604150 | 3.14  | 0.01        | Redox                        | Thioredoxin 2 (TRX2)                                          |           |
| T2-L2 | blue | Csa5G223070 | 3.216 | 0.003151    | Transcription factor         | WRKY DNA-binding protein 54 (WRKY54)                          | 3.00E-96  |
| T2-L2 | blue | Csa2G359890 | 3.289 | 3.70E-03    | Not assigned                 | unknown                                                       |           |
| T2-L2 | blue | Csa1G596520 | 3.4   | 0.0002165   | Protein degradation          | Cystein proteinases superfamily protein                       | 2.00E-168 |
| T2-L2 | blue | Csa7G395800 | 3.415 | 0.001823    | Miscellaneous                | Glutathione S-transferase phi 8 (GSTF8)                       | 3.00E-82  |
| T2-L2 | blue | Csa3G119700 | 3.575 | 0.00005376  | Transcription factor         | WRKY DNA-binding protein 53 (WRKY53)                          | 1.00E-102 |
| T2-L2 | blue | Csa6G381850 | 3.831 | 0.001156    | Transport                    | Amino acid permease 3 (AAP3)                                  | 2.00E-234 |
| T2-L2 | blue | Csa1G033160 | 4.495 | 0.006049    | Miscellaneous                | Glutathione S-transferase tau 9 (GSTU9)                       | 3.00E-68  |
| T2-L2 | blue | Csa6G486960 | 4.496 | 0.000002502 | Transcription factor         | WRKY DNA-binding protein 51 (WRKY51)                          | 1.00E-36  |
| T2-L2 | blue | Csa2G058620 | 5.345 | 0.003945    | Abiotic stress               | DNAJ heat shock N-terminal domain-containing protein          | 2.00E-137 |

Supplementary Table 1 (Continued)

|       |      |             |       |             |                              |                                                               |           |
|-------|------|-------------|-------|-------------|------------------------------|---------------------------------------------------------------|-----------|
| T2-L2 | blue | Csa1G574970 | 1.827 | 1.18E-05    | Major CHO metabolism         | Hexokinase 2 (HXK2)                                           | 7.00E-51  |
| T2-L2 | blue | Csa4G618520 | 1.837 | 0.0001765   | Biodegradation of xenobiotic | UDP glycosyltransferase (UGT)                                 | 1.00E-132 |
| T2-L2 | blue | Csa2G003610 | 1.841 | 0.0003098   | Lipid metabolism             | Abnormal inflorescence meristem (AIM1)                        | 3.00E-294 |
| T2-L2 | blue | Csa3G730930 | 1.847 | 0.00004243  | Transport                    | Ammonium transporter 2 (AMT2)                                 | 8E-220    |
| T2-L2 | blue | Csa6G493850 | 1.86  | 1.50E-05    | Not assigned                 | unknown                                                       |           |
| T2-L2 | blue | Csa3G159420 | 1.871 | 1.61E-03    | Not assigned                 | unknown                                                       |           |
| T2-L2 | blue | Csa1G528610 | 1.874 | 0.00435     | Lipid metabolism             | Thylakoid membrane anion transporter 1 (ANTR1)                | 7.00E-236 |
| T2-L2 | blue | Csa1G181360 | 1.875 | 0.001947    | Transport                    | non-intrinsic ABC protein 9 (NAP9)                            | 3.00E-156 |
| T2-L2 | blue | Csa3G154410 | 2.05  | 1.63E-10    | Not assigned                 | unknown                                                       |           |
| T2-L2 | blue | Csa3G183950 | 2.092 | 0.0004285   | Abiotic stress               | Heat shock protein 83                                         | 0.00E+00  |
| T2-L2 | blue | Csa2G296090 | 2.143 | 2.44E-04    | Not assigned                 | unknown                                                       |           |
| T2-L2 | blue | Csa7G291720 | 2.169 | 0.006566    | Lipid metabolism             | Choline kinase                                                | 4.00E-133 |
| T2-L2 | blue | Csa2G427310 | 2.238 | 0.007581    | Transcription factor         | MYB domain protein 73 (MYB73)                                 | 1.00E-88  |
| T2-L2 | blue | Csa3G881750 | 2.24  | 0.009561    | Lipid metabolism             | PR5-like receptor kinase (PR5K)                               | 4.00E-154 |
| T2-L2 | blue | Csa5G589260 | 2.243 | 0           | Amino acid metabolism        | O-acetylserine(thiol) lyase (OAS-TL)                          | 4.00E-162 |
| T2-L2 | blue | Csa3G733350 | 2.317 | 0.00004435  | Cell organization            | RHO guanyl-nucleotide exchange factor 11 (ROPGEF11)           | 9.00E-41  |
| T2-L2 | blue | Csa2G004690 | 2.522 | 0.000004593 | Transcription factor         | Heat shock transcription factor C1 (HSFC1)                    | 5.00E-67  |
| T2-L2 | blue | Csa7G387690 | 2.631 | 0.000001654 | Transport                    | Sulfate transporter 3;1 (SULTR 3;1)                           | 3.00E-307 |
| T2-L2 | blue | Csa1G008520 | 2.771 | 0.00804     | Transport                    | Plasma membrane proton ATPase 4 (HA4)                         | 0.00E+00  |
| T2-L2 | blue | Csa6G514850 | 3.048 | 0.00009803  | Miscellaneous                | Cytochrome P450 family 77 subfamily B polypeptide 1 (CYP77B1) | 1.00E-241 |
| T2-L2 | blue | Csa5G604150 | 3.14  | 0.01        | Redox                        | Thioredoxin 2 (TRX2)                                          |           |
| T2-L2 | blue | Csa5G223070 | 3.216 | 0.003151    | Transcription factor         | WRKY DNA-binding protein 54 (WRKY54)                          | 3.00E-96  |
| T2-L2 | blue | Csa2G359890 | 3.289 | 3.70E-03    | Not assigned                 | unknown                                                       |           |
| T2-L2 | blue | Csa1G596520 | 3.4   | 0.0002165   | Protein degradation          | Cystein proteinases superfamily protein                       | 2.00E-168 |
| T2-L2 | blue | Csa7G395800 | 3.415 | 0.001823    | Miscellaneous                | Glutathione S-transferase phi 8 (GSTF8)                       | 3.00E-82  |
| T2-L2 | blue | Csa3G119700 | 3.575 | 0.00005376  | Transcription factor         | WRKY DNA-binding protein 53 (WRKY53)                          | 1.00E-102 |
| T2-L2 | blue | Csa6G381850 | 3.831 | 0.001156    | Transport                    | Amino acid permease 3 (AAP3)                                  | 2.00E-234 |
| T2-L2 | blue | Csa1G033160 | 4.495 | 0.006049    | Miscellaneous                | Glutathione S-transferase tau 9 (GSTU9)                       | 3.00E-68  |
| T2-L2 | blue | Csa6G486960 | 4.496 | 0.000002502 | Transcription factor         | WRKY DNA-binding protein 51 (WRKY51)                          | 1.00E-36  |
| T2-L2 | blue | Csa2G058620 | 5.345 | 0.003945    | Abiotic stress               | DNAJ heat shock N-terminal domain-containing protein          | 2.00E-137 |

Supplementary Table 1 (Continued)

|       |      |             |       |             |                              |                                                               |           |
|-------|------|-------------|-------|-------------|------------------------------|---------------------------------------------------------------|-----------|
| T2-L2 | blue | Csa1G574970 | 1.827 | 1.18E-05    | Major CHO metabolism         | Hexokinase 2 (HXK2)                                           | 7.00E-51  |
| T2-L2 | blue | Csa4G618520 | 1.837 | 0.0001765   | Biodegradation of xenobiotic | UDP glycosyltransferase (UGT)                                 | 1.00E-132 |
| T2-L2 | blue | Csa2G003610 | 1.841 | 0.0003098   | Lipid metabolism             | Abnormal inflorescence meristem (AIM1)                        | 3.00E-294 |
| T2-L2 | blue | Csa3G730930 | 1.847 | 0.00004243  | Transport                    | Ammonium transporter 2 (AMT2)                                 | 8E-220    |
| T2-L2 | blue | Csa6G493850 | 1.86  | 1.50E-05    | Not assigned                 | unknown                                                       |           |
| T2-L2 | blue | Csa3G159420 | 1.871 | 1.61E-03    | Not assigned                 | unknown                                                       |           |
| T2-L2 | blue | Csa1G528610 | 1.874 | 0.00435     | Lipid metabolism             | Thylakoid membrane anion transporter 1 (ANTR1)                | 7.00E-236 |
| T2-L2 | blue | Csa1G181360 | 1.875 | 0.001947    | Transport                    | non-intrinsic ABC protein 9 (NAP9)                            | 3.00E-156 |
| T2-L2 | blue | Csa3G154410 | 2.05  | 1.63E-10    | Not assigned                 | unknown                                                       |           |
| T2-L2 | blue | Csa3G183950 | 2.092 | 0.0004285   | Abiotic stress               | Heat shock protein 83                                         | 0.00E+00  |
| T2-L2 | blue | Csa2G296090 | 2.143 | 2.44E-04    | Not assigned                 | unknown                                                       |           |
| T2-L2 | blue | Csa7G291720 | 2.169 | 0.006566    | Lipid metabolism             | Choline kinase                                                | 4.00E-133 |
| T2-L2 | blue | Csa2G427310 | 2.238 | 0.007581    | Transcription factor         | MYB domain protein 73 (MYB73)                                 | 1.00E-88  |
| T2-L2 | blue | Csa3G881750 | 2.24  | 0.009561    | Lipid metabolism             | PR5-like receptor kinase (PR5K)                               | 4.00E-154 |
| T2-L2 | blue | Csa5G589260 | 2.243 | 0           | Amino acid metabolism        | O-acetylserine(thiol) lyase (OAS-TL)                          | 4.00E-162 |
| T2-L2 | blue | Csa3G733350 | 2.317 | 0.00004435  | Cell organization            | RHO guanyl-nucleotide exchange factor 11 (ROPGEF11)           | 9.00E-41  |
| T2-L2 | blue | Csa2G004690 | 2.522 | 0.000004593 | Transcription factor         | Heat shock transcription factor C1 (HSFC1)                    | 5.00E-67  |
| T2-L2 | blue | Csa7G387690 | 2.631 | 0.000001654 | Transport                    | Sulfate transporter 3;1 (SULTR 3;1)                           | 3.00E-307 |
| T2-L2 | blue | Csa1G008520 | 2.771 | 0.00804     | Transport                    | Plasma membrane proton ATPase 4 (HA4)                         | 0.00E+00  |
| T2-L2 | blue | Csa6G514850 | 3.048 | 0.00009803  | Miscellaneous                | Cytochrome P450 family 77 subfamily B polypeptide 1 (CYP77B1) | 1.00E-241 |
| T2-L2 | blue | Csa5G604150 | 3.14  | 0.01        | Redox                        | Thioredoxin 2 (TRX2)                                          |           |
| T2-L2 | blue | Csa5G223070 | 3.216 | 0.003151    | Transcription factor         | WRKY DNA-binding protein 54 (WRKY54)                          | 3.00E-96  |
| T2-L2 | blue | Csa2G359890 | 3.289 | 3.70E-03    | Not assigned                 | unknown                                                       |           |
| T2-L2 | blue | Csa1G596520 | 3.4   | 0.0002165   | Protein degradation          | Cystein proteinases superfamily protein                       | 2.00E-168 |
| T2-L2 | blue | Csa7G395800 | 3.415 | 0.001823    | Miscellaneous                | Glutathione S-transferase phi 8 (GSTF8)                       | 3.00E-82  |
| T2-L2 | blue | Csa3G119700 | 3.575 | 0.00005376  | Transcription factor         | WRKY DNA-binding protein 53 (WRKY53)                          | 1.00E-102 |
| T2-L2 | blue | Csa6G381850 | 3.831 | 0.001156    | Transport                    | Amino acid permease 3 (AAP3)                                  | 2.00E-234 |
| T2-L2 | blue | Csa1G033160 | 4.495 | 0.006049    | Miscellaneous                | Glutathione S-transferase tau 9 (GSTU9)                       | 3.00E-68  |
| T2-L2 | blue | Csa6G486960 | 4.496 | 0.000002502 | Transcription factor         | WRKY DNA-binding protein 51 (WRKY51)                          | 1.00E-36  |
| T2-L2 | blue | Csa2G058620 | 5.345 | 0.003945    | Abiotic stress               | DNAJ heat shock N-terminal domain-containing protein          | 2.00E-137 |



Supplementary Table 1 (Continued)

|       |      |             |       |             |                              |                                                               |           |
|-------|------|-------------|-------|-------------|------------------------------|---------------------------------------------------------------|-----------|
| T2-L2 | blue | Csa1G574970 | 1.827 | 1.18E-05    | Major CHO metabolism         | Hexokinase 2 (HXK2)                                           | 7.00E-51  |
| T2-L2 | blue | Csa4G618520 | 1.837 | 0.0001765   | Biodegradation of xenobiotic | UDP glycosyltransferase (UGT)                                 | 1.00E-132 |
| T2-L2 | blue | Csa2G003610 | 1.841 | 0.0003098   | Lipid metabolism             | Abnormal inflorescence meristem (AIM1)                        | 3.00E-294 |
| T2-L2 | blue | Csa3G730930 | 1.847 | 0.00004243  | Transport                    | Ammonium transporter 2 (AMT2)                                 | 8E-220    |
| T2-L2 | blue | Csa6G493850 | 1.86  | 1.50E-05    | Not assigned                 | unknown                                                       |           |
| T2-L2 | blue | Csa3G159420 | 1.871 | 1.61E-03    | Not assigned                 | unknown                                                       |           |
| T2-L2 | blue | Csa1G528610 | 1.874 | 0.00435     | Lipid metabolism             | Thylakoid membrane anion transporter 1 (ANTR1)                | 7.00E-236 |
| T2-L2 | blue | Csa1G181360 | 1.875 | 0.001947    | Transport                    | non-intrinsic ABC protein 9 (NAP9)                            | 3.00E-156 |
| T2-L2 | blue | Csa3G154410 | 2.05  | 1.63E-10    | Not assigned                 | unknown                                                       |           |
| T2-L2 | blue | Csa3G183950 | 2.092 | 0.0004285   | Abiotic stress               | Heat shock protein 83                                         | 0.00E+00  |
| T2-L2 | blue | Csa2G296090 | 2.143 | 2.44E-04    | Not assigned                 | unknown                                                       |           |
| T2-L2 | blue | Csa7G291720 | 2.169 | 0.006566    | Lipid metabolism             | Choline kinase                                                | 4.00E-133 |
| T2-L2 | blue | Csa2G427310 | 2.238 | 0.007581    | Transcription factor         | MYB domain protein 73 (MYB73)                                 | 1.00E-88  |
| T2-L2 | blue | Csa3G881750 | 2.24  | 0.009561    | Lipid metabolism             | PR5-like receptor kinase (PR5K)                               | 4.00E-154 |
| T2-L2 | blue | Csa5G589260 | 2.243 | 0           | Amino acid metabolism        | O-acetylserine(thiol) lyase (OAS-TL)                          | 4.00E-162 |
| T2-L2 | blue | Csa3G733350 | 2.317 | 0.00004435  | Cell organization            | RHO guanyl-nucleotide exchange factor 11 (ROPGEF11)           | 9.00E-41  |
| T2-L2 | blue | Csa2G004690 | 2.522 | 0.000004593 | Transcription factor         | Heat shock transcription factor C1 (HSFC1)                    | 5.00E-67  |
| T2-L2 | blue | Csa7G387690 | 2.631 | 0.000001654 | Transport                    | Sulfate transporter 3;1 (SULTR 3;1)                           | 3.00E-307 |
| T2-L2 | blue | Csa1G008520 | 2.771 | 0.00804     | Transport                    | Plasma membrane proton ATPase 4 (HA4)                         | 0.00E+00  |
| T2-L2 | blue | Csa6G514850 | 3.048 | 0.00009803  | Miscellaneous                | Cytochrome P450 family 77 subfamily B polypeptide 1 (CYP77B1) | 1.00E-241 |
| T2-L2 | blue | Csa5G604150 | 3.14  | 0.01        | Redox                        | Thioredoxin 2 (TRX2)                                          |           |
| T2-L2 | blue | Csa5G223070 | 3.216 | 0.003151    | Transcription factor         | WRKY DNA-binding protein 54 (WRKY54)                          | 3.00E-96  |
| T2-L2 | blue | Csa2G359890 | 3.289 | 3.70E-03    | Not assigned                 | unknown                                                       |           |
| T2-L2 | blue | Csa1G596520 | 3.4   | 0.0002165   | Protein degradation          | Cystein proteinases superfamily protein                       | 2.00E-168 |
| T2-L2 | blue | Csa7G395800 | 3.415 | 0.001823    | Miscellaneous                | Glutathione S-transferase phi 8 (GSTF8)                       | 3.00E-82  |
| T2-L2 | blue | Csa3G119700 | 3.575 | 0.00005376  | Transcription factor         | WRKY DNA-binding protein 53 (WRKY53)                          | 1.00E-102 |
| T2-L2 | blue | Csa6G381850 | 3.831 | 0.001156    | Transport                    | Amino acid permease 3 (AAP3)                                  | 2.00E-234 |
| T2-L2 | blue | Csa1G033160 | 4.495 | 0.006049    | Miscellaneous                | Glutathione S-transferase tau 9 (GSTU9)                       | 3.00E-68  |
| T2-L2 | blue | Csa6G486960 | 4.496 | 0.000002502 | Transcription factor         | WRKY DNA-binding protein 51 (WRKY51)                          | 1.00E-36  |
| T2-L2 | blue | Csa2G058620 | 5.345 | 0.003945    | Abiotic stress               | DNAJ heat shock N-terminal domain-containing protein          | 2.00E-137 |

Supplementary Table 1 (Continued)

|       |      |             |       |             |                              |                                                               |           |
|-------|------|-------------|-------|-------------|------------------------------|---------------------------------------------------------------|-----------|
| T2-L2 | blue | Csa1G574970 | 1.827 | 1.18E-05    | Major CHO metabolism         | Hexokinase 2 (HXK2)                                           | 7.00E-51  |
| T2-L2 | blue | Csa4G618520 | 1.837 | 0.0001765   | Biodegradation of xenobiotic | UDP glycosyltransferase (UGT)                                 | 1.00E-132 |
| T2-L2 | blue | Csa2G003610 | 1.841 | 0.0003098   | Lipid metabolism             | Abnormal inflorescence meristem (AIM1)                        | 3.00E-294 |
| T2-L2 | blue | Csa3G730930 | 1.847 | 0.00004243  | Transport                    | Ammonium transporter 2 (AMT2)                                 | 8E-220    |
| T2-L2 | blue | Csa6G493850 | 1.86  | 1.50E-05    | Not assigned                 | unknown                                                       |           |
| T2-L2 | blue | Csa3G159420 | 1.871 | 1.61E-03    | Not assigned                 | unknown                                                       |           |
| T2-L2 | blue | Csa1G528610 | 1.874 | 0.00435     | Lipid metabolism             | Thylakoid membrane anion transporter 1 (ANTR1)                | 7.00E-236 |
| T2-L2 | blue | Csa1G181360 | 1.875 | 0.001947    | Transport                    | non-intrinsic ABC protein 9 (NAP9)                            | 3.00E-156 |
| T2-L2 | blue | Csa3G154410 | 2.05  | 1.63E-10    | Not assigned                 | unknown                                                       |           |
| T2-L2 | blue | Csa3G183950 | 2.092 | 0.0004285   | Abiotic stress               | Heat shock protein 83                                         | 0.00E+00  |
| T2-L2 | blue | Csa2G296090 | 2.143 | 2.44E-04    | Not assigned                 | unknown                                                       |           |
| T2-L2 | blue | Csa7G291720 | 2.169 | 0.006566    | Lipid metabolism             | Choline kinase                                                | 4.00E-133 |
| T2-L2 | blue | Csa2G427310 | 2.238 | 0.007581    | Transcription factor         | MYB domain protein 73 (MYB73)                                 | 1.00E-88  |
| T2-L2 | blue | Csa3G881750 | 2.24  | 0.009561    | Lipid metabolism             | PR5-like receptor kinase (PR5K)                               | 4.00E-154 |
| T2-L2 | blue | Csa5G589260 | 2.243 | 0           | Amino acid metabolism        | O-acetylserine(thiol) lyase (OAS-TL)                          | 4.00E-162 |
| T2-L2 | blue | Csa3G733350 | 2.317 | 0.00004435  | Cell organization            | RHO guanyl-nucleotide exchange factor 11 (ROPGEF11)           | 9.00E-41  |
| T2-L2 | blue | Csa2G004690 | 2.522 | 0.000004593 | Transcription factor         | Heat shock transcription factor C1 (HSFC1)                    | 5.00E-67  |
| T2-L2 | blue | Csa7G387690 | 2.631 | 0.000001654 | Transport                    | Sulfate transporter 3;1 (SULTR 3;1)                           | 3.00E-307 |
| T2-L2 | blue | Csa1G008520 | 2.771 | 0.00804     | Transport                    | Plasma membrane proton ATPase 4 (HA4)                         | 0.00E+00  |
| T2-L2 | blue | Csa6G514850 | 3.048 | 0.00009803  | Miscellaneous                | Cytochrome P450 family 77 subfamily B polypeptide 1 (CYP77B1) | 1.00E-241 |
| T2-L2 | blue | Csa5G604150 | 3.14  | 0.01        | Redox                        | Thioredoxin 2 (TRX2)                                          |           |
| T2-L2 | blue | Csa5G223070 | 3.216 | 0.003151    | Transcription factor         | WRKY DNA-binding protein 54 (WRKY54)                          | 3.00E-96  |
| T2-L2 | blue | Csa2G359890 | 3.289 | 3.70E-03    | Not assigned                 | unknown                                                       |           |
| T2-L2 | blue | Csa1G596520 | 3.4   | 0.0002165   | Protein degradation          | Cystein proteinases superfamily protein                       | 2.00E-168 |
| T2-L2 | blue | Csa7G395800 | 3.415 | 0.001823    | Miscellaneous                | Glutathione S-transferase phi 8 (GSTF8)                       | 3.00E-82  |
| T2-L2 | blue | Csa3G119700 | 3.575 | 0.00005376  | Transcription factor         | WRKY DNA-binding protein 53 (WRKY53)                          | 1.00E-102 |
| T2-L2 | blue | Csa6G381850 | 3.831 | 0.001156    | Transport                    | Amino acid permease 3 (AAP3)                                  | 2.00E-234 |
| T2-L2 | blue | Csa1G033160 | 4.495 | 0.006049    | Miscellaneous                | Glutathione S-transferase tau 9 (GSTU9)                       | 3.00E-68  |
| T2-L2 | blue | Csa6G486960 | 4.496 | 0.000002502 | Transcription factor         | WRKY DNA-binding protein 51 (WRKY51)                          | 1.00E-36  |
| T2-L2 | blue | Csa2G058620 | 5.345 | 0.003945    | Abiotic stress               | DNAJ heat shock N-terminal domain-containing protein          | 2.00E-137 |

Supplementary Table 1 (Continued)

|       |      |             |       |             |                              |                                                               |           |
|-------|------|-------------|-------|-------------|------------------------------|---------------------------------------------------------------|-----------|
| T2-L2 | blue | Csa1G574970 | 1.827 | 1.18E-05    | Major CHO metabolism         | Hexokinase 2 (HXK2)                                           | 7.00E-51  |
| T2-L2 | blue | Csa4G618520 | 1.837 | 0.0001765   | Biodegradation of xenobiotic | UDP glycosyltransferase (UGT)                                 | 1.00E-132 |
| T2-L2 | blue | Csa2G003610 | 1.841 | 0.0003098   | Lipid metabolism             | Abnormal inflorescence meristem (AIM1)                        | 3.00E-294 |
| T2-L2 | blue | Csa3G730930 | 1.847 | 0.00004243  | Transport                    | Ammonium transporter 2 (AMT2)                                 | 8E-220    |
| T2-L2 | blue | Csa6G493850 | 1.86  | 1.50E-05    | Not assigned                 | unknown                                                       |           |
| T2-L2 | blue | Csa3G159420 | 1.871 | 1.61E-03    | Not assigned                 | unknown                                                       |           |
| T2-L2 | blue | Csa1G528610 | 1.874 | 0.00435     | Lipid metabolism             | Thylakoid membrane anion transporter 1 (ANTR1)                | 7.00E-236 |
| T2-L2 | blue | Csa1G181360 | 1.875 | 0.001947    | Transport                    | non-intrinsic ABC protein 9 (NAP9)                            | 3.00E-156 |
| T2-L2 | blue | Csa3G154410 | 2.05  | 1.63E-10    | Not assigned                 | unknown                                                       |           |
| T2-L2 | blue | Csa3G183950 | 2.092 | 0.0004285   | Abiotic stress               | Heat shock protein 83                                         | 0.00E+00  |
| T2-L2 | blue | Csa2G296090 | 2.143 | 2.44E-04    | Not assigned                 | unknown                                                       |           |
| T2-L2 | blue | Csa7G291720 | 2.169 | 0.006566    | Lipid metabolism             | Choline kinase                                                | 4.00E-133 |
| T2-L2 | blue | Csa2G427310 | 2.238 | 0.007581    | Transcription factor         | MYB domain protein 73 (MYB73)                                 | 1.00E-88  |
| T2-L2 | blue | Csa3G881750 | 2.24  | 0.009561    | Lipid metabolism             | PR5-like receptor kinase (PR5K)                               | 4.00E-154 |
| T2-L2 | blue | Csa5G589260 | 2.243 | 0           | Amino acid metabolism        | O-acetylserine(thiol) lyase (OAS-TL)                          | 4.00E-162 |
| T2-L2 | blue | Csa3G733350 | 2.317 | 0.00004435  | Cell organization            | RHO guanyl-nucleotide exchange factor 11 (ROPGEF11)           | 9.00E-41  |
| T2-L2 | blue | Csa2G004690 | 2.522 | 0.000004593 | Transcription factor         | Heat shock transcription factor C1 (HSFC1)                    | 5.00E-67  |
| T2-L2 | blue | Csa7G387690 | 2.631 | 0.000001654 | Transport                    | Sulfate transporter 3;1 (SULTR 3;1)                           | 3.00E-307 |
| T2-L2 | blue | Csa1G008520 | 2.771 | 0.00804     | Transport                    | Plasma membrane proton ATPase 4 (HA4)                         | 0.00E+00  |
| T2-L2 | blue | Csa6G514850 | 3.048 | 0.00009803  | Miscellaneous                | Cytochrome P450 family 77 subfamily B polypeptide 1 (CYP77B1) | 1.00E-241 |
| T2-L2 | blue | Csa5G604150 | 3.14  | 0.01        | Redox                        | Thioredoxin 2 (TRX2)                                          |           |
| T2-L2 | blue | Csa5G223070 | 3.216 | 0.003151    | Transcription factor         | WRKY DNA-binding protein 54 (WRKY54)                          | 3.00E-96  |
| T2-L2 | blue | Csa2G359890 | 3.289 | 3.70E-03    | Not assigned                 | unknown                                                       |           |
| T2-L2 | blue | Csa1G596520 | 3.4   | 0.0002165   | Protein degradation          | Cystein proteinases superfamily protein                       | 2.00E-168 |
| T2-L2 | blue | Csa7G395800 | 3.415 | 0.001823    | Miscellaneous                | Glutathione S-transferase phi 8 (GSTF8)                       | 3.00E-82  |
| T2-L2 | blue | Csa3G119700 | 3.575 | 0.00005376  | Transcription factor         | WRKY DNA-binding protein 53 (WRKY53)                          | 1.00E-102 |
| T2-L2 | blue | Csa6G381850 | 3.831 | 0.001156    | Transport                    | Amino acid permease 3 (AAP3)                                  | 2.00E-234 |
| T2-L2 | blue | Csa1G033160 | 4.495 | 0.006049    | Miscellaneous                | Glutathione S-transferase tau 9 (GSTU9)                       | 3.00E-68  |
| T2-L2 | blue | Csa6G486960 | 4.496 | 0.000002502 | Transcription factor         | WRKY DNA-binding protein 51 (WRKY51)                          | 1.00E-36  |
| T2-L2 | blue | Csa2G058620 | 5.345 | 0.003945    | Abiotic stress               | DNAJ heat shock N-terminal domain-containing protein          | 2.00E-137 |

Supplementary Table 1 (Continued)

|       |      |             |       |             |                              |                                                               |           |
|-------|------|-------------|-------|-------------|------------------------------|---------------------------------------------------------------|-----------|
| T2-L2 | blue | Csa1G574970 | 1.827 | 1.18E-05    | Major CHO metabolism         | Hexokinase 2 (HXK2)                                           | 7.00E-51  |
| T2-L2 | blue | Csa4G618520 | 1.837 | 0.0001765   | Biodegradation of xenobiotic | UDP glycosyltransferase (UGT)                                 | 1.00E-132 |
| T2-L2 | blue | Csa2G003610 | 1.841 | 0.0003098   | Lipid metabolism             | Abnormal inflorescence meristem (AIM1)                        | 3.00E-294 |
| T2-L2 | blue | Csa3G730930 | 1.847 | 0.00004243  | Transport                    | Ammonium transporter 2 (AMT2)                                 | 8E-220    |
| T2-L2 | blue | Csa6G493850 | 1.86  | 1.50E-05    | Not assigned                 | unknown                                                       |           |
| T2-L2 | blue | Csa3G159420 | 1.871 | 1.61E-03    | Not assigned                 | unknown                                                       |           |
| T2-L2 | blue | Csa1G528610 | 1.874 | 0.00435     | Lipid metabolism             | Thylakoid membrane anion transporter 1 (ANTR1)                | 7.00E-236 |
| T2-L2 | blue | Csa1G181360 | 1.875 | 0.001947    | Transport                    | non-intrinsic ABC protein 9 (NAP9)                            | 3.00E-156 |
| T2-L2 | blue | Csa3G154410 | 2.05  | 1.63E-10    | Not assigned                 | unknown                                                       |           |
| T2-L2 | blue | Csa3G183950 | 2.092 | 0.0004285   | Abiotic stress               | Heat shock protein 83                                         | 0.00E+00  |
| T2-L2 | blue | Csa2G296090 | 2.143 | 2.44E-04    | Not assigned                 | unknown                                                       |           |
| T2-L2 | blue | Csa7G291720 | 2.169 | 0.006566    | Lipid metabolism             | Choline kinase                                                | 4.00E-133 |
| T2-L2 | blue | Csa2G427310 | 2.238 | 0.007581    | Transcription factor         | MYB domain protein 73 (MYB73)                                 | 1.00E-88  |
| T2-L2 | blue | Csa3G881750 | 2.24  | 0.009561    | Lipid metabolism             | PR5-like receptor kinase (PR5K)                               | 4.00E-154 |
| T2-L2 | blue | Csa5G589260 | 2.243 | 0           | Amino acid metabolism        | O-acetylserine(thiol) lyase (OAS-TL)                          | 4.00E-162 |
| T2-L2 | blue | Csa3G733350 | 2.317 | 0.00004435  | Cell organization            | RHO guanyl-nucleotide exchange factor 11 (ROPGEF11)           | 9.00E-41  |
| T2-L2 | blue | Csa2G004690 | 2.522 | 0.000004593 | Transcription factor         | Heat shock transcription factor C1 (HSFC1)                    | 5.00E-67  |
| T2-L2 | blue | Csa7G387690 | 2.631 | 0.000001654 | Transport                    | Sulfate transporter 3;1 (SULTR 3;1)                           | 3.00E-307 |
| T2-L2 | blue | Csa1G008520 | 2.771 | 0.00804     | Transport                    | Plasma membrane proton ATPase 4 (HA4)                         | 0.00E+00  |
| T2-L2 | blue | Csa6G514850 | 3.048 | 0.00009803  | Miscellaneous                | Cytochrome P450 family 77 subfamily B polypeptide 1 (CYP77B1) | 1.00E-241 |
| T2-L2 | blue | Csa5G604150 | 3.14  | 0.01        | Redox                        | Thioredoxin 2 (TRX2)                                          |           |
| T2-L2 | blue | Csa5G223070 | 3.216 | 0.003151    | Transcription factor         | WRKY DNA-binding protein 54 (WRKY54)                          | 3.00E-96  |
| T2-L2 | blue | Csa2G359890 | 3.289 | 3.70E-03    | Not assigned                 | unknown                                                       |           |
| T2-L2 | blue | Csa1G596520 | 3.4   | 0.0002165   | Protein degradation          | Cystein proteinases superfamily protein                       | 2.00E-168 |
| T2-L2 | blue | Csa7G395800 | 3.415 | 0.001823    | Miscellaneous                | Glutathione S-transferase phi 8 (GSTF8)                       | 3.00E-82  |
| T2-L2 | blue | Csa3G119700 | 3.575 | 0.00005376  | Transcription factor         | WRKY DNA-binding protein 53 (WRKY53)                          | 1.00E-102 |
| T2-L2 | blue | Csa6G381850 | 3.831 | 0.001156    | Transport                    | Amino acid permease 3 (AAP3)                                  | 2.00E-234 |
| T2-L2 | blue | Csa1G033160 | 4.495 | 0.006049    | Miscellaneous                | Glutathione S-transferase tau 9 (GSTU9)                       | 3.00E-68  |
| T2-L2 | blue | Csa6G486960 | 4.496 | 0.000002502 | Transcription factor         | WRKY DNA-binding protein 51 (WRKY51)                          | 1.00E-36  |
| T2-L2 | blue | Csa2G058620 | 5.345 | 0.003945    | Abiotic stress               | DNAJ heat shock N-terminal domain-containing protein          | 2.00E-137 |

Supplementary Table 1 (Continued)

|       |      |             |       |             |                              |                                                               |           |
|-------|------|-------------|-------|-------------|------------------------------|---------------------------------------------------------------|-----------|
| T2-L2 | blue | Csa1G574970 | 1.827 | 1.18E-05    | Major CHO metabolism         | Hexokinase 2 (HXK2)                                           | 7.00E-51  |
| T2-L2 | blue | Csa4G618520 | 1.837 | 0.0001765   | Biodegradation of xenobiotic | UDP glycosyltransferase (UGT)                                 | 1.00E-132 |
| T2-L2 | blue | Csa2G003610 | 1.841 | 0.0003098   | Lipid metabolism             | Abnormal inflorescence meristem (AIM1)                        | 3.00E-294 |
| T2-L2 | blue | Csa3G730930 | 1.847 | 0.00004243  | Transport                    | Ammonium transporter 2 (AMT2)                                 | 8E-220    |
| T2-L2 | blue | Csa6G493850 | 1.86  | 1.50E-05    | Not assigned                 | unknown                                                       |           |
| T2-L2 | blue | Csa3G159420 | 1.871 | 1.61E-03    | Not assigned                 | unknown                                                       |           |
| T2-L2 | blue | Csa1G528610 | 1.874 | 0.00435     | Lipid metabolism             | Thylakoid membrane anion transporter 1 (ANTR1)                | 7.00E-236 |
| T2-L2 | blue | Csa1G181360 | 1.875 | 0.001947    | Transport                    | non-intrinsic ABC protein 9 (NAP9)                            | 3.00E-156 |
| T2-L2 | blue | Csa3G154410 | 2.05  | 1.63E-10    | Not assigned                 | unknown                                                       |           |
| T2-L2 | blue | Csa3G183950 | 2.092 | 0.0004285   | Abiotic stress               | Heat shock protein 83                                         | 0.00E+00  |
| T2-L2 | blue | Csa2G296090 | 2.143 | 2.44E-04    | Not assigned                 | unknown                                                       |           |
| T2-L2 | blue | Csa7G291720 | 2.169 | 0.006566    | Lipid metabolism             | Choline kinase                                                | 4.00E-133 |
| T2-L2 | blue | Csa2G427310 | 2.238 | 0.007581    | Transcription factor         | MYB domain protein 73 (MYB73)                                 | 1.00E-88  |
| T2-L2 | blue | Csa3G881750 | 2.24  | 0.009561    | Lipid metabolism             | PR5-like receptor kinase (PR5K)                               | 4.00E-154 |
| T2-L2 | blue | Csa5G589260 | 2.243 | 0           | Amino acid metabolism        | O-acetylserine(thiol) lyase (OAS-TL)                          | 4.00E-162 |
| T2-L2 | blue | Csa3G733350 | 2.317 | 0.00004435  | Cell organization            | RHO guanyl-nucleotide exchange factor 11 (ROPGEF11)           | 9.00E-41  |
| T2-L2 | blue | Csa2G004690 | 2.522 | 0.000004593 | Transcription factor         | Heat shock transcription factor C1 (HSFC1)                    | 5.00E-67  |
| T2-L2 | blue | Csa7G387690 | 2.631 | 0.000001654 | Transport                    | Sulfate transporter 3;1 (SULTR 3;1)                           | 3.00E-307 |
| T2-L2 | blue | Csa1G008520 | 2.771 | 0.00804     | Transport                    | Plasma membrane proton ATPase 4 (HA4)                         | 0.00E+00  |
| T2-L2 | blue | Csa6G514850 | 3.048 | 0.00009803  | Miscellaneous                | Cytochrome P450 family 77 subfamily B polypeptide 1 (CYP77B1) | 1.00E-241 |
| T2-L2 | blue | Csa5G604150 | 3.14  | 0.01        | Redox                        | Thioredoxin 2 (TRX2)                                          |           |
| T2-L2 | blue | Csa5G223070 | 3.216 | 0.003151    | Transcription factor         | WRKY DNA-binding protein 54 (WRKY54)                          | 3.00E-96  |
| T2-L2 | blue | Csa2G359890 | 3.289 | 3.70E-03    | Not assigned                 | unknown                                                       |           |
| T2-L2 | blue | Csa1G596520 | 3.4   | 0.0002165   | Protein degradation          | Cystein proteinases superfamily protein                       | 2.00E-168 |
| T2-L2 | blue | Csa7G395800 | 3.415 | 0.001823    | Miscellaneous                | Glutathione S-transferase phi 8 (GSTF8)                       | 3.00E-82  |
| T2-L2 | blue | Csa3G119700 | 3.575 | 0.00005376  | Transcription factor         | WRKY DNA-binding protein 53 (WRKY53)                          | 1.00E-102 |
| T2-L2 | blue | Csa6G381850 | 3.831 | 0.001156    | Transport                    | Amino acid permease 3 (AAP3)                                  | 2.00E-234 |
| T2-L2 | blue | Csa1G033160 | 4.495 | 0.006049    | Miscellaneous                | Glutathione S-transferase tau 9 (GSTU9)                       | 3.00E-68  |
| T2-L2 | blue | Csa6G486960 | 4.496 | 0.000002502 | Transcription factor         | WRKY DNA-binding protein 51 (WRKY51)                          | 1.00E-36  |
| T2-L2 | blue | Csa2G058620 | 5.345 | 0.003945    | Abiotic stress               | DNAJ heat shock N-terminal domain-containing protein          | 2.00E-137 |

Supplementary Table 1 (Continued)

|       |      |             |       |             |                              |                                                               |           |
|-------|------|-------------|-------|-------------|------------------------------|---------------------------------------------------------------|-----------|
| T2-L2 | blue | Csa1G574970 | 1.827 | 1.18E-05    | Major CHO metabolism         | Hexokinase 2 (HXK2)                                           | 7.00E-51  |
| T2-L2 | blue | Csa4G618520 | 1.837 | 0.0001765   | Biodegradation of xenobiotic | UDP glycosyltransferase (UGT)                                 | 1.00E-132 |
| T2-L2 | blue | Csa2G003610 | 1.841 | 0.0003098   | Lipid metabolism             | Abnormal inflorescence meristem (AIM1)                        | 3.00E-294 |
| T2-L2 | blue | Csa3G730930 | 1.847 | 0.00004243  | Transport                    | Ammonium transporter 2 (AMT2)                                 | 8E-220    |
| T2-L2 | blue | Csa6G493850 | 1.86  | 1.50E-05    | Not assigned                 | unknown                                                       |           |
| T2-L2 | blue | Csa3G159420 | 1.871 | 1.61E-03    | Not assigned                 | unknown                                                       |           |
| T2-L2 | blue | Csa1G528610 | 1.874 | 0.00435     | Lipid metabolism             | Thylakoid membrane anion transporter 1 (ANTR1)                | 7.00E-236 |
| T2-L2 | blue | Csa1G181360 | 1.875 | 0.001947    | Transport                    | non-intrinsic ABC protein 9 (NAP9)                            | 3.00E-156 |
| T2-L2 | blue | Csa3G154410 | 2.05  | 1.63E-10    | Not assigned                 | unknown                                                       |           |
| T2-L2 | blue | Csa3G183950 | 2.092 | 0.0004285   | Abiotic stress               | Heat shock protein 83                                         | 0.00E+00  |
| T2-L2 | blue | Csa2G296090 | 2.143 | 2.44E-04    | Not assigned                 | unknown                                                       |           |
| T2-L2 | blue | Csa7G291720 | 2.169 | 0.006566    | Lipid metabolism             | Choline kinase                                                | 4.00E-133 |
| T2-L2 | blue | Csa2G427310 | 2.238 | 0.007581    | Transcription factor         | MYB domain protein 73 (MYB73)                                 | 1.00E-88  |
| T2-L2 | blue | Csa3G881750 | 2.24  | 0.009561    | Lipid metabolism             | PR5-like receptor kinase (PR5K)                               | 4.00E-154 |
| T2-L2 | blue | Csa5G589260 | 2.243 | 0           | Amino acid metabolism        | O-acetylserine(thiol) lyase (OAS-TL)                          | 4.00E-162 |
| T2-L2 | blue | Csa3G733350 | 2.317 | 0.00004435  | Cell organization            | RHO guanyl-nucleotide exchange factor 11 (ROPGEF11)           | 9.00E-41  |
| T2-L2 | blue | Csa2G004690 | 2.522 | 0.000004593 | Transcription factor         | Heat shock transcription factor C1 (HSFC1)                    | 5.00E-67  |
| T2-L2 | blue | Csa7G387690 | 2.631 | 0.000001654 | Transport                    | Sulfate transporter 3;1 (SULTR 3;1)                           | 3.00E-307 |
| T2-L2 | blue | Csa1G008520 | 2.771 | 0.00804     | Transport                    | Plasma membrane proton ATPase 4 (HA4)                         | 0.00E+00  |
| T2-L2 | blue | Csa6G514850 | 3.048 | 0.00009803  | Miscellaneous                | Cytochrome P450 family 77 subfamily B polypeptide 1 (CYP77B1) | 1.00E-241 |
| T2-L2 | blue | Csa5G604150 | 3.14  | 0.01        | Redox                        | Thioredoxin 2 (TRX2)                                          |           |
| T2-L2 | blue | Csa5G223070 | 3.216 | 0.003151    | Transcription factor         | WRKY DNA-binding protein 54 (WRKY54)                          | 3.00E-96  |
| T2-L2 | blue | Csa2G359890 | 3.289 | 3.70E-03    | Not assigned                 | unknown                                                       |           |
| T2-L2 | blue | Csa1G596520 | 3.4   | 0.0002165   | Protein degradation          | Cystein proteinases superfamily protein                       | 2.00E-168 |
| T2-L2 | blue | Csa7G395800 | 3.415 | 0.001823    | Miscellaneous                | Glutathione S-transferase phi 8 (GSTF8)                       | 3.00E-82  |
| T2-L2 | blue | Csa3G119700 | 3.575 | 0.00005376  | Transcription factor         | WRKY DNA-binding protein 53 (WRKY53)                          | 1.00E-102 |
| T2-L2 | blue | Csa6G381850 | 3.831 | 0.001156    | Transport                    | Amino acid permease 3 (AAP3)                                  | 2.00E-234 |
| T2-L2 | blue | Csa1G033160 | 4.495 | 0.006049    | Miscellaneous                | Glutathione S-transferase tau 9 (GSTU9)                       | 3.00E-68  |
| T2-L2 | blue | Csa6G486960 | 4.496 | 0.000002502 | Transcription factor         | WRKY DNA-binding protein 51 (WRKY51)                          | 1.00E-36  |
| T2-L2 | blue | Csa2G058620 | 5.345 | 0.003945    | Abiotic stress               | DNAJ heat shock N-terminal domain-containing protein          | 2.00E-137 |

Supplementary Table 1 (Continued)

|       |      |             |       |             |                              |                                                               |           |
|-------|------|-------------|-------|-------------|------------------------------|---------------------------------------------------------------|-----------|
| T2-L2 | blue | Csa1G574970 | 1.827 | 1.18E-05    | Major CHO metabolism         | Hexokinase 2 (HXK2)                                           | 7.00E-51  |
| T2-L2 | blue | Csa4G618520 | 1.837 | 0.0001765   | Biodegradation of xenobiotic | UDP glycosyltransferase (UGT)                                 | 1.00E-132 |
| T2-L2 | blue | Csa2G003610 | 1.841 | 0.0003098   | Lipid metabolism             | Abnormal inflorescence meristem (AIM1)                        | 3.00E-294 |
| T2-L2 | blue | Csa3G730930 | 1.847 | 0.00004243  | Transport                    | Ammonium transporter 2 (AMT2)                                 | 8E-220    |
| T2-L2 | blue | Csa6G493850 | 1.86  | 1.50E-05    | Not assigned                 | unknown                                                       |           |
| T2-L2 | blue | Csa3G159420 | 1.871 | 1.61E-03    | Not assigned                 | unknown                                                       |           |
| T2-L2 | blue | Csa1G528610 | 1.874 | 0.00435     | Lipid metabolism             | Thylakoid membrane anion transporter 1 (ANTR1)                | 7.00E-236 |
| T2-L2 | blue | Csa1G181360 | 1.875 | 0.001947    | Transport                    | non-intrinsic ABC protein 9 (NAP9)                            | 3.00E-156 |
| T2-L2 | blue | Csa3G154410 | 2.05  | 1.63E-10    | Not assigned                 | unknown                                                       |           |
| T2-L2 | blue | Csa3G183950 | 2.092 | 0.0004285   | Abiotic stress               | Heat shock protein 83                                         | 0.00E+00  |
| T2-L2 | blue | Csa2G296090 | 2.143 | 2.44E-04    | Not assigned                 | unknown                                                       |           |
| T2-L2 | blue | Csa7G291720 | 2.169 | 0.006566    | Lipid metabolism             | Choline kinase                                                | 4.00E-133 |
| T2-L2 | blue | Csa2G427310 | 2.238 | 0.007581    | Transcription factor         | MYB domain protein 73 (MYB73)                                 | 1.00E-88  |
| T2-L2 | blue | Csa3G881750 | 2.24  | 0.009561    | Lipid metabolism             | PR5-like receptor kinase (PR5K)                               | 4.00E-154 |
| T2-L2 | blue | Csa5G589260 | 2.243 | 0           | Amino acid metabolism        | O-acetylserine(thiol) lyase (OAS-TL)                          | 4.00E-162 |
| T2-L2 | blue | Csa3G733350 | 2.317 | 0.00004435  | Cell organization            | RHO guanyl-nucleotide exchange factor 11 (ROPGEF11)           | 9.00E-41  |
| T2-L2 | blue | Csa2G004690 | 2.522 | 0.000004593 | Transcription factor         | Heat shock transcription factor C1 (HSFC1)                    | 5.00E-67  |
| T2-L2 | blue | Csa7G387690 | 2.631 | 0.000001654 | Transport                    | Sulfate transporter 3;1 (SULTR 3;1)                           | 3.00E-307 |
| T2-L2 | blue | Csa1G008520 | 2.771 | 0.00804     | Transport                    | Plasma membrane proton ATPase 4 (HA4)                         | 0.00E+00  |
| T2-L2 | blue | Csa6G514850 | 3.048 | 0.00009803  | Miscellaneous                | Cytochrome P450 family 77 subfamily B polypeptide 1 (CYP77B1) | 1.00E-241 |
| T2-L2 | blue | Csa5G604150 | 3.14  | 0.01        | Redox                        | Thioredoxin 2 (TRX2)                                          |           |
| T2-L2 | blue | Csa5G223070 | 3.216 | 0.003151    | Transcription factor         | WRKY DNA-binding protein 54 (WRKY54)                          | 3.00E-96  |
| T2-L2 | blue | Csa2G359890 | 3.289 | 3.70E-03    | Not assigned                 | unknown                                                       |           |
| T2-L2 | blue | Csa1G596520 | 3.4   | 0.0002165   | Protein degradation          | Cystein proteinases superfamily protein                       | 2.00E-168 |
| T2-L2 | blue | Csa7G395800 | 3.415 | 0.001823    | Miscellaneous                | Glutathione S-transferase phi 8 (GSTF8)                       | 3.00E-82  |
| T2-L2 | blue | Csa3G119700 | 3.575 | 0.00005376  | Transcription factor         | WRKY DNA-binding protein 53 (WRKY53)                          | 1.00E-102 |
| T2-L2 | blue | Csa6G381850 | 3.831 | 0.001156    | Transport                    | Amino acid permease 3 (AAP3)                                  | 2.00E-234 |
| T2-L2 | blue | Csa1G033160 | 4.495 | 0.006049    | Miscellaneous                | Glutathione S-transferase tau 9 (GSTU9)                       | 3.00E-68  |
| T2-L2 | blue | Csa6G486960 | 4.496 | 0.000002502 | Transcription factor         | WRKY DNA-binding protein 51 (WRKY51)                          | 1.00E-36  |
| T2-L2 | blue | Csa2G058620 | 5.345 | 0.003945    | Abiotic stress               | DNAJ heat shock N-terminal domain-containing protein          | 2.00E-137 |

Supplementary Table 1 (Continued)

|       |      |             |       |             |                              |                                                               |           |
|-------|------|-------------|-------|-------------|------------------------------|---------------------------------------------------------------|-----------|
| T2-L2 | blue | Csa1G574970 | 1.827 | 1.18E-05    | Major CHO metabolism         | Hexokinase 2 (HXK2)                                           | 7.00E-51  |
| T2-L2 | blue | Csa4G618520 | 1.837 | 0.0001765   | Biodegradation of xenobiotic | UDP glycosyltransferase (UGT)                                 | 1.00E-132 |
| T2-L2 | blue | Csa2G003610 | 1.841 | 0.0003098   | Lipid metabolism             | Abnormal inflorescence meristem (AIM1)                        | 3.00E-294 |
| T2-L2 | blue | Csa3G730930 | 1.847 | 0.00004243  | Transport                    | Ammonium transporter 2 (AMT2)                                 | 8E-220    |
| T2-L2 | blue | Csa6G493850 | 1.86  | 1.50E-05    | Not assigned                 | unknown                                                       |           |
| T2-L2 | blue | Csa3G159420 | 1.871 | 1.61E-03    | Not assigned                 | unknown                                                       |           |
| T2-L2 | blue | Csa1G528610 | 1.874 | 0.00435     | Lipid metabolism             | Thylakoid membrane anion transporter 1 (ANTR1)                | 7.00E-236 |
| T2-L2 | blue | Csa1G181360 | 1.875 | 0.001947    | Transport                    | non-intrinsic ABC protein 9 (NAP9)                            | 3.00E-156 |
| T2-L2 | blue | Csa3G154410 | 2.05  | 1.63E-10    | Not assigned                 | unknown                                                       |           |
| T2-L2 | blue | Csa3G183950 | 2.092 | 0.0004285   | Abiotic stress               | Heat shock protein 83                                         | 0.00E+00  |
| T2-L2 | blue | Csa2G296090 | 2.143 | 2.44E-04    | Not assigned                 | unknown                                                       |           |
| T2-L2 | blue | Csa7G291720 | 2.169 | 0.006566    | Lipid metabolism             | Choline kinase                                                | 4.00E-133 |
| T2-L2 | blue | Csa2G427310 | 2.238 | 0.007581    | Transcription factor         | MYB domain protein 73 (MYB73)                                 | 1.00E-88  |
| T2-L2 | blue | Csa3G881750 | 2.24  | 0.009561    | Lipid metabolism             | PR5-like receptor kinase (PR5K)                               | 4.00E-154 |
| T2-L2 | blue | Csa5G589260 | 2.243 | 0           | Amino acid metabolism        | O-acetylserine(thiol) lyase (OAS-TL)                          | 4.00E-162 |
| T2-L2 | blue | Csa3G733350 | 2.317 | 0.00004435  | Cell organization            | RHO guanyl-nucleotide exchange factor 11 (ROPGEF11)           | 9.00E-41  |
| T2-L2 | blue | Csa2G004690 | 2.522 | 0.000004593 | Transcription factor         | Heat shock transcription factor C1 (HSFC1)                    | 5.00E-67  |
| T2-L2 | blue | Csa7G387690 | 2.631 | 0.000001654 | Transport                    | Sulfate transporter 3;1 (SULTR 3;1)                           | 3.00E-307 |
| T2-L2 | blue | Csa1G008520 | 2.771 | 0.00804     | Transport                    | Plasma membrane proton ATPase 4 (HA4)                         | 0.00E+00  |
| T2-L2 | blue | Csa6G514850 | 3.048 | 0.00009803  | Miscellaneous                | Cytochrome P450 family 77 subfamily B polypeptide 1 (CYP77B1) | 1.00E-241 |
| T2-L2 | blue | Csa5G604150 | 3.14  | 0.01        | Redox                        | Thioredoxin 2 (TRX2)                                          |           |
| T2-L2 | blue | Csa5G223070 | 3.216 | 0.003151    | Transcription factor         | WRKY DNA-binding protein 54 (WRKY54)                          | 3.00E-96  |
| T2-L2 | blue | Csa2G359890 | 3.289 | 3.70E-03    | Not assigned                 | unknown                                                       |           |
| T2-L2 | blue | Csa1G596520 | 3.4   | 0.0002165   | Protein degradation          | Cystein proteinases superfamily protein                       | 2.00E-168 |
| T2-L2 | blue | Csa7G395800 | 3.415 | 0.001823    | Miscellaneous                | Glutathione S-transferase phi 8 (GSTF8)                       | 3.00E-82  |
| T2-L2 | blue | Csa3G119700 | 3.575 | 0.00005376  | Transcription factor         | WRKY DNA-binding protein 53 (WRKY53)                          | 1.00E-102 |
| T2-L2 | blue | Csa6G381850 | 3.831 | 0.001156    | Transport                    | Amino acid permease 3 (AAP3)                                  | 2.00E-234 |
| T2-L2 | blue | Csa1G033160 | 4.495 | 0.006049    | Miscellaneous                | Glutathione S-transferase tau 9 (GSTU9)                       | 3.00E-68  |
| T2-L2 | blue | Csa6G486960 | 4.496 | 0.000002502 | Transcription factor         | WRKY DNA-binding protein 51 (WRKY51)                          | 1.00E-36  |
| T2-L2 | blue | Csa2G058620 | 5.345 | 0.003945    | Abiotic stress               | DNAJ heat shock N-terminal domain-containing protein          | 2.00E-137 |



Supplementary Table 1 (Continued)

|       |      |             |       |             |                              |                                                               |           |
|-------|------|-------------|-------|-------------|------------------------------|---------------------------------------------------------------|-----------|
| T2-L2 | blue | Csa1G574970 | 1.827 | 1.18E-05    | Major CHO metabolism         | Hexokinase 2 (HXK2)                                           | 7.00E-51  |
| T2-L2 | blue | Csa4G618520 | 1.837 | 0.0001765   | Biodegradation of xenobiotic | UDP glycosyltransferase (UGT)                                 | 1.00E-132 |
| T2-L2 | blue | Csa2G003610 | 1.841 | 0.0003098   | Lipid metabolism             | Abnormal inflorescence meristem (AIM1)                        | 3.00E-294 |
| T2-L2 | blue | Csa3G730930 | 1.847 | 0.00004243  | Transport                    | Ammonium transporter 2 (AMT2)                                 | 8E-220    |
| T2-L2 | blue | Csa6G493850 | 1.86  | 1.50E-05    | Not assigned                 | unknown                                                       |           |
| T2-L2 | blue | Csa3G159420 | 1.871 | 1.61E-03    | Not assigned                 | unknown                                                       |           |
| T2-L2 | blue | Csa1G528610 | 1.874 | 0.00435     | Lipid metabolism             | Thylakoid membrane anion transporter 1 (ANTR1)                | 7.00E-236 |
| T2-L2 | blue | Csa1G181360 | 1.875 | 0.001947    | Transport                    | non-intrinsic ABC protein 9 (NAP9)                            | 3.00E-156 |
| T2-L2 | blue | Csa3G154410 | 2.05  | 1.63E-10    | Not assigned                 | unknown                                                       |           |
| T2-L2 | blue | Csa3G183950 | 2.092 | 0.0004285   | Abiotic stress               | Heat shock protein 83                                         | 0.00E+00  |
| T2-L2 | blue | Csa2G296090 | 2.143 | 2.44E-04    | Not assigned                 | unknown                                                       |           |
| T2-L2 | blue | Csa7G291720 | 2.169 | 0.006566    | Lipid metabolism             | Choline kinase                                                | 4.00E-133 |
| T2-L2 | blue | Csa2G427310 | 2.238 | 0.007581    | Transcription factor         | MYB domain protein 73 (MYB73)                                 | 1.00E-88  |
| T2-L2 | blue | Csa3G881750 | 2.24  | 0.009561    | Lipid metabolism             | PR5-like receptor kinase (PR5K)                               | 4.00E-154 |
| T2-L2 | blue | Csa5G589260 | 2.243 | 0           | Amino acid metabolism        | O-acetylserine(thiol) lyase (OAS-TL)                          | 4.00E-162 |
| T2-L2 | blue | Csa3G733350 | 2.317 | 0.00004435  | Cell organization            | RHO guanyl-nucleotide exchange factor 11 (ROPGEF11)           | 9.00E-41  |
| T2-L2 | blue | Csa2G004690 | 2.522 | 0.000004593 | Transcription factor         | Heat shock transcription factor C1 (HSFC1)                    | 5.00E-67  |
| T2-L2 | blue | Csa7G387690 | 2.631 | 0.000001654 | Transport                    | Sulfate transporter 3;1 (SULTR 3;1)                           | 3.00E-307 |
| T2-L2 | blue | Csa1G008520 | 2.771 | 0.00804     | Transport                    | Plasma membrane proton ATPase 4 (HA4)                         | 0.00E+00  |
| T2-L2 | blue | Csa6G514850 | 3.048 | 0.00009803  | Miscellaneous                | Cytochrome P450 family 77 subfamily B polypeptide 1 (CYP77B1) | 1.00E-241 |
| T2-L2 | blue | Csa5G604150 | 3.14  | 0.01        | Redox                        | Thioredoxin 2 (TRX2)                                          |           |
| T2-L2 | blue | Csa5G223070 | 3.216 | 0.003151    | Transcription factor         | WRKY DNA-binding protein 54 (WRKY54)                          | 3.00E-96  |
| T2-L2 | blue | Csa2G359890 | 3.289 | 3.70E-03    | Not assigned                 | unknown                                                       |           |
| T2-L2 | blue | Csa1G596520 | 3.4   | 0.0002165   | Protein degradation          | Cystein proteinases superfamily protein                       | 2.00E-168 |
| T2-L2 | blue | Csa7G395800 | 3.415 | 0.001823    | Miscellaneous                | Glutathione S-transferase phi 8 (GSTF8)                       | 3.00E-82  |
| T2-L2 | blue | Csa3G119700 | 3.575 | 0.00005376  | Transcription factor         | WRKY DNA-binding protein 53 (WRKY53)                          | 1.00E-102 |
| T2-L2 | blue | Csa6G381850 | 3.831 | 0.001156    | Transport                    | Amino acid permease 3 (AAP3)                                  | 2.00E-234 |
| T2-L2 | blue | Csa1G033160 | 4.495 | 0.006049    | Miscellaneous                | Glutathione S-transferase tau 9 (GSTU9)                       | 3.00E-68  |
| T2-L2 | blue | Csa6G486960 | 4.496 | 0.000002502 | Transcription factor         | WRKY DNA-binding protein 51 (WRKY51)                          | 1.00E-36  |
| T2-L2 | blue | Csa2G058620 | 5.345 | 0.003945    | Abiotic stress               | DNAJ heat shock N-terminal domain-containing protein          | 2.00E-137 |

Supplementary Table 1 (Continued)

|       |      |             |       |             |                              |                                                               |           |
|-------|------|-------------|-------|-------------|------------------------------|---------------------------------------------------------------|-----------|
| T2-L2 | blue | Csa1G574970 | 1.827 | 1.18E-05    | Major CHO metabolism         | Hexokinase 2 (HXK2)                                           | 7.00E-51  |
| T2-L2 | blue | Csa4G618520 | 1.837 | 0.0001765   | Biodegradation of xenobiotic | UDP glycosyltransferase (UGT)                                 | 1.00E-132 |
| T2-L2 | blue | Csa2G003610 | 1.841 | 0.0003098   | Lipid metabolism             | Abnormal inflorescence meristem (AIM1)                        | 3.00E-294 |
| T2-L2 | blue | Csa3G730930 | 1.847 | 0.00004243  | Transport                    | Ammonium transporter 2 (AMT2)                                 | 8E-220    |
| T2-L2 | blue | Csa6G493850 | 1.86  | 1.50E-05    | Not assigned                 | unknown                                                       |           |
| T2-L2 | blue | Csa3G159420 | 1.871 | 1.61E-03    | Not assigned                 | unknown                                                       |           |
| T2-L2 | blue | Csa1G528610 | 1.874 | 0.00435     | Lipid metabolism             | Thylakoid membrane anion transporter 1 (ANTR1)                | 7.00E-236 |
| T2-L2 | blue | Csa1G181360 | 1.875 | 0.001947    | Transport                    | non-intrinsic ABC protein 9 (NAP9)                            | 3.00E-156 |
| T2-L2 | blue | Csa3G154410 | 2.05  | 1.63E-10    | Not assigned                 | unknown                                                       |           |
| T2-L2 | blue | Csa3G183950 | 2.092 | 0.0004285   | Abiotic stress               | Heat shock protein 83                                         | 0.00E+00  |
| T2-L2 | blue | Csa2G296090 | 2.143 | 2.44E-04    | Not assigned                 | unknown                                                       |           |
| T2-L2 | blue | Csa7G291720 | 2.169 | 0.006566    | Lipid metabolism             | Choline kinase                                                | 4.00E-133 |
| T2-L2 | blue | Csa2G427310 | 2.238 | 0.007581    | Transcription factor         | MYB domain protein 73 (MYB73)                                 | 1.00E-88  |
| T2-L2 | blue | Csa3G881750 | 2.24  | 0.009561    | Lipid metabolism             | PR5-like receptor kinase (PR5K)                               | 4.00E-154 |
| T2-L2 | blue | Csa5G589260 | 2.243 | 0           | Amino acid metabolism        | O-acetylserine(thiol) lyase (OAS-TL)                          | 4.00E-162 |
| T2-L2 | blue | Csa3G733350 | 2.317 | 0.00004435  | Cell organization            | RHO guanyl-nucleotide exchange factor 11 (ROPGEF11)           | 9.00E-41  |
| T2-L2 | blue | Csa2G004690 | 2.522 | 0.000004593 | Transcription factor         | Heat shock transcription factor C1 (HSFC1)                    | 5.00E-67  |
| T2-L2 | blue | Csa7G387690 | 2.631 | 0.000001654 | Transport                    | Sulfate transporter 3;1 (SULTR 3;1)                           | 3.00E-307 |
| T2-L2 | blue | Csa1G008520 | 2.771 | 0.00804     | Transport                    | Plasma membrane proton ATPase 4 (HA4)                         | 0.00E+00  |
| T2-L2 | blue | Csa6G514850 | 3.048 | 0.00009803  | Miscellaneous                | Cytochrome P450 family 77 subfamily B polypeptide 1 (CYP77B1) | 1.00E-241 |
| T2-L2 | blue | Csa5G604150 | 3.14  | 0.01        | Redox                        | Thioredoxin 2 (TRX2)                                          |           |
| T2-L2 | blue | Csa5G223070 | 3.216 | 0.003151    | Transcription factor         | WRKY DNA-binding protein 54 (WRKY54)                          | 3.00E-96  |
| T2-L2 | blue | Csa2G359890 | 3.289 | 3.70E-03    | Not assigned                 | unknown                                                       |           |
| T2-L2 | blue | Csa1G596520 | 3.4   | 0.0002165   | Protein degradation          | Cystein proteinases superfamily protein                       | 2.00E-168 |
| T2-L2 | blue | Csa7G395800 | 3.415 | 0.001823    | Miscellaneous                | Glutathione S-transferase phi 8 (GSTF8)                       | 3.00E-82  |
| T2-L2 | blue | Csa3G119700 | 3.575 | 0.00005376  | Transcription factor         | WRKY DNA-binding protein 53 (WRKY53)                          | 1.00E-102 |
| T2-L2 | blue | Csa6G381850 | 3.831 | 0.001156    | Transport                    | Amino acid permease 3 (AAP3)                                  | 2.00E-234 |
| T2-L2 | blue | Csa1G033160 | 4.495 | 0.006049    | Miscellaneous                | Glutathione S-transferase tau 9 (GSTU9)                       | 3.00E-68  |
| T2-L2 | blue | Csa6G486960 | 4.496 | 0.000002502 | Transcription factor         | WRKY DNA-binding protein 51 (WRKY51)                          | 1.00E-36  |
| T2-L2 | blue | Csa2G058620 | 5.345 | 0.003945    | Abiotic stress               | DNAJ heat shock N-terminal domain-containing protein          | 2.00E-137 |

Supplementary Table 1 (Continued)

|       |      |             |       |             |                              |                                                               |           |
|-------|------|-------------|-------|-------------|------------------------------|---------------------------------------------------------------|-----------|
| T2-L2 | blue | Csa1G574970 | 1.827 | 1.18E-05    | Major CHO metabolism         | Hexokinase 2 (HXK2)                                           | 7.00E-51  |
| T2-L2 | blue | Csa4G618520 | 1.837 | 0.0001765   | Biodegradation of xenobiotic | UDP glycosyltransferase (UGT)                                 | 1.00E-132 |
| T2-L2 | blue | Csa2G003610 | 1.841 | 0.0003098   | Lipid metabolism             | Abnormal inflorescence meristem (AIM1)                        | 3.00E-294 |
| T2-L2 | blue | Csa3G730930 | 1.847 | 0.00004243  | Transport                    | Ammonium transporter 2 (AMT2)                                 | 8E-220    |
| T2-L2 | blue | Csa6G493850 | 1.86  | 1.50E-05    | Not assigned                 | unknown                                                       |           |
| T2-L2 | blue | Csa3G159420 | 1.871 | 1.61E-03    | Not assigned                 | unknown                                                       |           |
| T2-L2 | blue | Csa1G528610 | 1.874 | 0.00435     | Lipid metabolism             | Thylakoid membrane anion transporter 1 (ANTR1)                | 7.00E-236 |
| T2-L2 | blue | Csa1G181360 | 1.875 | 0.001947    | Transport                    | non-intrinsic ABC protein 9 (NAP9)                            | 3.00E-156 |
| T2-L2 | blue | Csa3G154410 | 2.05  | 1.63E-10    | Not assigned                 | unknown                                                       |           |
| T2-L2 | blue | Csa3G183950 | 2.092 | 0.0004285   | Abiotic stress               | Heat shock protein 83                                         | 0.00E+00  |
| T2-L2 | blue | Csa2G296090 | 2.143 | 2.44E-04    | Not assigned                 | unknown                                                       |           |
| T2-L2 | blue | Csa7G291720 | 2.169 | 0.006566    | Lipid metabolism             | Choline kinase                                                | 4.00E-133 |
| T2-L2 | blue | Csa2G427310 | 2.238 | 0.007581    | Transcription factor         | MYB domain protein 73 (MYB73)                                 | 1.00E-88  |
| T2-L2 | blue | Csa3G881750 | 2.24  | 0.009561    | Lipid metabolism             | PR5-like receptor kinase (PR5K)                               | 4.00E-154 |
| T2-L2 | blue | Csa5G589260 | 2.243 | 0           | Amino acid metabolism        | O-acetylserine(thiol) lyase (OAS-TL)                          | 4.00E-162 |
| T2-L2 | blue | Csa3G733350 | 2.317 | 0.00004435  | Cell organization            | RHO guanyl-nucleotide exchange factor 11 (ROPGEF11)           | 9.00E-41  |
| T2-L2 | blue | Csa2G004690 | 2.522 | 0.000004593 | Transcription factor         | Heat shock transcription factor C1 (HSFC1)                    | 5.00E-67  |
| T2-L2 | blue | Csa7G387690 | 2.631 | 0.000001654 | Transport                    | Sulfate transporter 3;1 (SULTR 3;1)                           | 3.00E-307 |
| T2-L2 | blue | Csa1G008520 | 2.771 | 0.00804     | Transport                    | Plasma membrane proton ATPase 4 (HA4)                         | 0.00E+00  |
| T2-L2 | blue | Csa6G514850 | 3.048 | 0.00009803  | Miscellaneous                | Cytochrome P450 family 77 subfamily B polypeptide 1 (CYP77B1) | 1.00E-241 |
| T2-L2 | blue | Csa5G604150 | 3.14  | 0.01        | Redox                        | Thioredoxin 2 (TRX2)                                          |           |
| T2-L2 | blue | Csa5G223070 | 3.216 | 0.003151    | Transcription factor         | WRKY DNA-binding protein 54 (WRKY54)                          | 3.00E-96  |
| T2-L2 | blue | Csa2G359890 | 3.289 | 3.70E-03    | Not assigned                 | unknown                                                       |           |
| T2-L2 | blue | Csa1G596520 | 3.4   | 0.0002165   | Protein degradation          | Cystein proteinases superfamily protein                       | 2.00E-168 |
| T2-L2 | blue | Csa7G395800 | 3.415 | 0.001823    | Miscellaneous                | Glutathione S-transferase phi 8 (GSTF8)                       | 3.00E-82  |
| T2-L2 | blue | Csa3G119700 | 3.575 | 0.00005376  | Transcription factor         | WRKY DNA-binding protein 53 (WRKY53)                          | 1.00E-102 |
| T2-L2 | blue | Csa6G381850 | 3.831 | 0.001156    | Transport                    | Amino acid permease 3 (AAP3)                                  | 2.00E-234 |
| T2-L2 | blue | Csa1G033160 | 4.495 | 0.006049    | Miscellaneous                | Glutathione S-transferase tau 9 (GSTU9)                       | 3.00E-68  |
| T2-L2 | blue | Csa6G486960 | 4.496 | 0.000002502 | Transcription factor         | WRKY DNA-binding protein 51 (WRKY51)                          | 1.00E-36  |
| T2-L2 | blue | Csa2G058620 | 5.345 | 0.003945    | Abiotic stress               | DNAJ heat shock N-terminal domain-containing protein          | 2.00E-137 |

Supplementary Table 1 (Continued)

|       |      |             |       |             |                              |                                                               |           |
|-------|------|-------------|-------|-------------|------------------------------|---------------------------------------------------------------|-----------|
| T2-L2 | blue | Csa1G574970 | 1.827 | 1.18E-05    | Major CHO metabolism         | Hexokinase 2 (HXK2)                                           | 7.00E-51  |
| T2-L2 | blue | Csa4G618520 | 1.837 | 0.0001765   | Biodegradation of xenobiotic | UDP glycosyltransferase (UGT)                                 | 1.00E-132 |
| T2-L2 | blue | Csa2G003610 | 1.841 | 0.0003098   | Lipid metabolism             | Abnormal inflorescence meristem (AIM1)                        | 3.00E-294 |
| T2-L2 | blue | Csa3G730930 | 1.847 | 0.00004243  | Transport                    | Ammonium transporter 2 (AMT2)                                 | 8E-220    |
| T2-L2 | blue | Csa6G493850 | 1.86  | 1.50E-05    | Not assigned                 | unknown                                                       |           |
| T2-L2 | blue | Csa3G159420 | 1.871 | 1.61E-03    | Not assigned                 | unknown                                                       |           |
| T2-L2 | blue | Csa1G528610 | 1.874 | 0.00435     | Lipid metabolism             | Thylakoid membrane anion transporter 1 (ANTR1)                | 7.00E-236 |
| T2-L2 | blue | Csa1G181360 | 1.875 | 0.001947    | Transport                    | non-intrinsic ABC protein 9 (NAP9)                            | 3.00E-156 |
| T2-L2 | blue | Csa3G154410 | 2.05  | 1.63E-10    | Not assigned                 | unknown                                                       |           |
| T2-L2 | blue | Csa3G183950 | 2.092 | 0.0004285   | Abiotic stress               | Heat shock protein 83                                         | 0.00E+00  |
| T2-L2 | blue | Csa2G296090 | 2.143 | 2.44E-04    | Not assigned                 | unknown                                                       |           |
| T2-L2 | blue | Csa7G291720 | 2.169 | 0.006566    | Lipid metabolism             | Choline kinase                                                | 4.00E-133 |
| T2-L2 | blue | Csa2G427310 | 2.238 | 0.007581    | Transcription factor         | MYB domain protein 73 (MYB73)                                 | 1.00E-88  |
| T2-L2 | blue | Csa3G881750 | 2.24  | 0.009561    | Lipid metabolism             | PR5-like receptor kinase (PR5K)                               | 4.00E-154 |
| T2-L2 | blue | Csa5G589260 | 2.243 | 0           | Amino acid metabolism        | O-acetylserine(thiol) lyase (OAS-TL)                          | 4.00E-162 |
| T2-L2 | blue | Csa3G733350 | 2.317 | 0.00004435  | Cell organization            | RHO guanyl-nucleotide exchange factor 11 (ROPGEF11)           | 9.00E-41  |
| T2-L2 | blue | Csa2G004690 | 2.522 | 0.000004593 | Transcription factor         | Heat shock transcription factor C1 (HSFC1)                    | 5.00E-67  |
| T2-L2 | blue | Csa7G387690 | 2.631 | 0.000001654 | Transport                    | Sulfate transporter 3;1 (SULTR 3;1)                           | 3.00E-307 |
| T2-L2 | blue | Csa1G008520 | 2.771 | 0.00804     | Transport                    | Plasma membrane proton ATPase 4 (HA4)                         | 0.00E+00  |
| T2-L2 | blue | Csa6G514850 | 3.048 | 0.00009803  | Miscellaneous                | Cytochrome P450 family 77 subfamily B polypeptide 1 (CYP77B1) | 1.00E-241 |
| T2-L2 | blue | Csa5G604150 | 3.14  | 0.01        | Redox                        | Thioredoxin 2 (TRX2)                                          |           |
| T2-L2 | blue | Csa5G223070 | 3.216 | 0.003151    | Transcription factor         | WRKY DNA-binding protein 54 (WRKY54)                          | 3.00E-96  |
| T2-L2 | blue | Csa2G359890 | 3.289 | 3.70E-03    | Not assigned                 | unknown                                                       |           |
| T2-L2 | blue | Csa1G596520 | 3.4   | 0.0002165   | Protein degradation          | Cystein proteinases superfamily protein                       | 2.00E-168 |
| T2-L2 | blue | Csa7G395800 | 3.415 | 0.001823    | Miscellaneous                | Glutathione S-transferase phi 8 (GSTF8)                       | 3.00E-82  |
| T2-L2 | blue | Csa3G119700 | 3.575 | 0.00005376  | Transcription factor         | WRKY DNA-binding protein 53 (WRKY53)                          | 1.00E-102 |
| T2-L2 | blue | Csa6G381850 | 3.831 | 0.001156    | Transport                    | Amino acid permease 3 (AAP3)                                  | 2.00E-234 |
| T2-L2 | blue | Csa1G033160 | 4.495 | 0.006049    | Miscellaneous                | Glutathione S-transferase tau 9 (GSTU9)                       | 3.00E-68  |
| T2-L2 | blue | Csa6G486960 | 4.496 | 0.000002502 | Transcription factor         | WRKY DNA-binding protein 51 (WRKY51)                          | 1.00E-36  |
| T2-L2 | blue | Csa2G058620 | 5.345 | 0.003945    | Abiotic stress               | DNAJ heat shock N-terminal domain-containing protein          | 2.00E-137 |

Supplementary Table 1 (Continued)

|       |      |             |       |             |                              |                                                               |           |
|-------|------|-------------|-------|-------------|------------------------------|---------------------------------------------------------------|-----------|
| T2-L2 | blue | Csa1G574970 | 1.827 | 1.18E-05    | Major CHO metabolism         | Hexokinase 2 (HXK2)                                           | 7.00E-51  |
| T2-L2 | blue | Csa4G618520 | 1.837 | 0.0001765   | Biodegradation of xenobiotic | UDP glycosyltransferase (UGT)                                 | 1.00E-132 |
| T2-L2 | blue | Csa2G003610 | 1.841 | 0.0003098   | Lipid metabolism             | Abnormal inflorescence meristem (AIM1)                        | 3.00E-294 |
| T2-L2 | blue | Csa3G730930 | 1.847 | 0.00004243  | Transport                    | Ammonium transporter 2 (AMT2)                                 | 8E-220    |
| T2-L2 | blue | Csa6G493850 | 1.86  | 1.50E-05    | Not assigned                 | unknown                                                       |           |
| T2-L2 | blue | Csa3G159420 | 1.871 | 1.61E-03    | Not assigned                 | unknown                                                       |           |
| T2-L2 | blue | Csa1G528610 | 1.874 | 0.00435     | Lipid metabolism             | Thylakoid membrane anion transporter 1 (ANTR1)                | 7.00E-236 |
| T2-L2 | blue | Csa1G181360 | 1.875 | 0.001947    | Transport                    | non-intrinsic ABC protein 9 (NAP9)                            | 3.00E-156 |
| T2-L2 | blue | Csa3G154410 | 2.05  | 1.63E-10    | Not assigned                 | unknown                                                       |           |
| T2-L2 | blue | Csa3G183950 | 2.092 | 0.0004285   | Abiotic stress               | Heat shock protein 83                                         | 0.00E+00  |
| T2-L2 | blue | Csa2G296090 | 2.143 | 2.44E-04    | Not assigned                 | unknown                                                       |           |
| T2-L2 | blue | Csa7G291720 | 2.169 | 0.006566    | Lipid metabolism             | Choline kinase                                                | 4.00E-133 |
| T2-L2 | blue | Csa2G427310 | 2.238 | 0.007581    | Transcription factor         | MYB domain protein 73 (MYB73)                                 | 1.00E-88  |
| T2-L2 | blue | Csa3G881750 | 2.24  | 0.009561    | Lipid metabolism             | PR5-like receptor kinase (PR5K)                               | 4.00E-154 |
| T2-L2 | blue | Csa5G589260 | 2.243 | 0           | Amino acid metabolism        | O-acetylserine(thiol) lyase (OAS-TL)                          | 4.00E-162 |
| T2-L2 | blue | Csa3G733350 | 2.317 | 0.00004435  | Cell organization            | RHO guanyl-nucleotide exchange factor 11 (ROPGEF11)           | 9.00E-41  |
| T2-L2 | blue | Csa2G004690 | 2.522 | 0.000004593 | Transcription factor         | Heat shock transcription factor C1 (HSFC1)                    | 5.00E-67  |
| T2-L2 | blue | Csa7G387690 | 2.631 | 0.000001654 | Transport                    | Sulfate transporter 3;1 (SULTR 3;1)                           | 3.00E-307 |
| T2-L2 | blue | Csa1G008520 | 2.771 | 0.00804     | Transport                    | Plasma membrane proton ATPase 4 (HA4)                         | 0.00E+00  |
| T2-L2 | blue | Csa6G514850 | 3.048 | 0.00009803  | Miscellaneous                | Cytochrome P450 family 77 subfamily B polypeptide 1 (CYP77B1) | 1.00E-241 |
| T2-L2 | blue | Csa5G604150 | 3.14  | 0.01        | Redox                        | Thioredoxin 2 (TRX2)                                          |           |
| T2-L2 | blue | Csa5G223070 | 3.216 | 0.003151    | Transcription factor         | WRKY DNA-binding protein 54 (WRKY54)                          | 3.00E-96  |
| T2-L2 | blue | Csa2G359890 | 3.289 | 3.70E-03    | Not assigned                 | unknown                                                       |           |
| T2-L2 | blue | Csa1G596520 | 3.4   | 0.0002165   | Protein degradation          | Cystein proteinases superfamily protein                       | 2.00E-168 |
| T2-L2 | blue | Csa7G395800 | 3.415 | 0.001823    | Miscellaneous                | Glutathione S-transferase phi 8 (GSTF8)                       | 3.00E-82  |
| T2-L2 | blue | Csa3G119700 | 3.575 | 0.00005376  | Transcription factor         | WRKY DNA-binding protein 53 (WRKY53)                          | 1.00E-102 |
| T2-L2 | blue | Csa6G381850 | 3.831 | 0.001156    | Transport                    | Amino acid permease 3 (AAP3)                                  | 2.00E-234 |
| T2-L2 | blue | Csa1G033160 | 4.495 | 0.006049    | Miscellaneous                | Glutathione S-transferase tau 9 (GSTU9)                       | 3.00E-68  |
| T2-L2 | blue | Csa6G486960 | 4.496 | 0.000002502 | Transcription factor         | WRKY DNA-binding protein 51 (WRKY51)                          | 1.00E-36  |
| T2-L2 | blue | Csa2G058620 | 5.345 | 0.003945    | Abiotic stress               | DNAJ heat shock N-terminal domain-containing protein          | 2.00E-137 |

Supplementary Table 1 (Continued)

|       |      |             |       |             |                              |                                                               |           |
|-------|------|-------------|-------|-------------|------------------------------|---------------------------------------------------------------|-----------|
| T2-L2 | blue | Csa1G574970 | 1.827 | 1.18E-05    | Major CHO metabolism         | Hexokinase 2 (HXK2)                                           | 7.00E-51  |
| T2-L2 | blue | Csa4G618520 | 1.837 | 0.0001765   | Biodegradation of xenobiotic | UDP glycosyltransferase (UGT)                                 | 1.00E-132 |
| T2-L2 | blue | Csa2G003610 | 1.841 | 0.0003098   | Lipid metabolism             | Abnormal inflorescence meristem (AIM1)                        | 3.00E-294 |
| T2-L2 | blue | Csa3G730930 | 1.847 | 0.00004243  | Transport                    | Ammonium transporter 2 (AMT2)                                 | 8E-220    |
| T2-L2 | blue | Csa6G493850 | 1.86  | 1.50E-05    | Not assigned                 | unknown                                                       |           |
| T2-L2 | blue | Csa3G159420 | 1.871 | 1.61E-03    | Not assigned                 | unknown                                                       |           |
| T2-L2 | blue | Csa1G528610 | 1.874 | 0.00435     | Lipid metabolism             | Thylakoid membrane anion transporter 1 (ANTR1)                | 7.00E-236 |
| T2-L2 | blue | Csa1G181360 | 1.875 | 0.001947    | Transport                    | non-intrinsic ABC protein 9 (NAP9)                            | 3.00E-156 |
| T2-L2 | blue | Csa3G154410 | 2.05  | 1.63E-10    | Not assigned                 | unknown                                                       |           |
| T2-L2 | blue | Csa3G183950 | 2.092 | 0.0004285   | Abiotic stress               | Heat shock protein 83                                         | 0.00E+00  |
| T2-L2 | blue | Csa2G296090 | 2.143 | 2.44E-04    | Not assigned                 | unknown                                                       |           |
| T2-L2 | blue | Csa7G291720 | 2.169 | 0.006566    | Lipid metabolism             | Choline kinase                                                | 4.00E-133 |
| T2-L2 | blue | Csa2G427310 | 2.238 | 0.007581    | Transcription factor         | MYB domain protein 73 (MYB73)                                 | 1.00E-88  |
| T2-L2 | blue | Csa3G881750 | 2.24  | 0.009561    | Lipid metabolism             | PR5-like receptor kinase (PR5K)                               | 4.00E-154 |
| T2-L2 | blue | Csa5G589260 | 2.243 | 0           | Amino acid metabolism        | O-acetylserine(thiol) lyase (OAS-TL)                          | 4.00E-162 |
| T2-L2 | blue | Csa3G733350 | 2.317 | 0.00004435  | Cell organization            | RHO guanyl-nucleotide exchange factor 11 (ROPGEF11)           | 9.00E-41  |
| T2-L2 | blue | Csa2G004690 | 2.522 | 0.000004593 | Transcription factor         | Heat shock transcription factor C1 (HSFC1)                    | 5.00E-67  |
| T2-L2 | blue | Csa7G387690 | 2.631 | 0.000001654 | Transport                    | Sulfate transporter 3;1 (SULTR 3;1)                           | 3.00E-307 |
| T2-L2 | blue | Csa1G008520 | 2.771 | 0.00804     | Transport                    | Plasma membrane proton ATPase 4 (HA4)                         | 0.00E+00  |
| T2-L2 | blue | Csa6G514850 | 3.048 | 0.00009803  | Miscellaneous                | Cytochrome P450 family 77 subfamily B polypeptide 1 (CYP77B1) | 1.00E-241 |
| T2-L2 | blue | Csa5G604150 | 3.14  | 0.01        | Redox                        | Thioredoxin 2 (TRX2)                                          |           |
| T2-L2 | blue | Csa5G223070 | 3.216 | 0.003151    | Transcription factor         | WRKY DNA-binding protein 54 (WRKY54)                          | 3.00E-96  |
| T2-L2 | blue | Csa2G359890 | 3.289 | 3.70E-03    | Not assigned                 | unknown                                                       |           |
| T2-L2 | blue | Csa1G596520 | 3.4   | 0.0002165   | Protein degradation          | Cystein proteinases superfamily protein                       | 2.00E-168 |
| T2-L2 | blue | Csa7G395800 | 3.415 | 0.001823    | Miscellaneous                | Glutathione S-transferase phi 8 (GSTF8)                       | 3.00E-82  |
| T2-L2 | blue | Csa3G119700 | 3.575 | 0.00005376  | Transcription factor         | WRKY DNA-binding protein 53 (WRKY53)                          | 1.00E-102 |
| T2-L2 | blue | Csa6G381850 | 3.831 | 0.001156    | Transport                    | Amino acid permease 3 (AAP3)                                  | 2.00E-234 |
| T2-L2 | blue | Csa1G033160 | 4.495 | 0.006049    | Miscellaneous                | Glutathione S-transferase tau 9 (GSTU9)                       | 3.00E-68  |
| T2-L2 | blue | Csa6G486960 | 4.496 | 0.000002502 | Transcription factor         | WRKY DNA-binding protein 51 (WRKY51)                          | 1.00E-36  |
| T2-L2 | blue | Csa2G058620 | 5.345 | 0.003945    | Abiotic stress               | DNAJ heat shock N-terminal domain-containing protein          | 2.00E-137 |

Supplementary Table 1 (Continued)

|       |      |             |       |             |                              |                                                               |           |
|-------|------|-------------|-------|-------------|------------------------------|---------------------------------------------------------------|-----------|
| T2-L2 | blue | Csa1G574970 | 1.827 | 1.18E-05    | Major CHO metabolism         | Hexokinase 2 (HXK2)                                           | 7.00E-51  |
| T2-L2 | blue | Csa4G618520 | 1.837 | 0.0001765   | Biodegradation of xenobiotic | UDP glycosyltransferase (UGT)                                 | 1.00E-132 |
| T2-L2 | blue | Csa2G003610 | 1.841 | 0.0003098   | Lipid metabolism             | Abnormal inflorescence meristem (AIM1)                        | 3.00E-294 |
| T2-L2 | blue | Csa3G730930 | 1.847 | 0.00004243  | Transport                    | Ammonium transporter 2 (AMT2)                                 | 8E-220    |
| T2-L2 | blue | Csa6G493850 | 1.86  | 1.50E-05    | Not assigned                 | unknown                                                       |           |
| T2-L2 | blue | Csa3G159420 | 1.871 | 1.61E-03    | Not assigned                 | unknown                                                       |           |
| T2-L2 | blue | Csa1G528610 | 1.874 | 0.00435     | Lipid metabolism             | Thylakoid membrane anion transporter 1 (ANTR1)                | 7.00E-236 |
| T2-L2 | blue | Csa1G181360 | 1.875 | 0.001947    | Transport                    | non-intrinsic ABC protein 9 (NAP9)                            | 3.00E-156 |
| T2-L2 | blue | Csa3G154410 | 2.05  | 1.63E-10    | Not assigned                 | unknown                                                       |           |
| T2-L2 | blue | Csa3G183950 | 2.092 | 0.0004285   | Abiotic stress               | Heat shock protein 83                                         | 0.00E+00  |
| T2-L2 | blue | Csa2G296090 | 2.143 | 2.44E-04    | Not assigned                 | unknown                                                       |           |
| T2-L2 | blue | Csa7G291720 | 2.169 | 0.006566    | Lipid metabolism             | Choline kinase                                                | 4.00E-133 |
| T2-L2 | blue | Csa2G427310 | 2.238 | 0.007581    | Transcription factor         | MYB domain protein 73 (MYB73)                                 | 1.00E-88  |
| T2-L2 | blue | Csa3G881750 | 2.24  | 0.009561    | Lipid metabolism             | PR5-like receptor kinase (PR5K)                               | 4.00E-154 |
| T2-L2 | blue | Csa5G589260 | 2.243 | 0           | Amino acid metabolism        | O-acetylserine(thiol) lyase (OAS-TL)                          | 4.00E-162 |
| T2-L2 | blue | Csa3G733350 | 2.317 | 0.00004435  | Cell organization            | RHO guanyl-nucleotide exchange factor 11 (ROPGEF11)           | 9.00E-41  |
| T2-L2 | blue | Csa2G004690 | 2.522 | 0.000004593 | Transcription factor         | Heat shock transcription factor C1 (HSFC1)                    | 5.00E-67  |
| T2-L2 | blue | Csa7G387690 | 2.631 | 0.000001654 | Transport                    | Sulfate transporter 3;1 (SULTR 3;1)                           | 3.00E-307 |
| T2-L2 | blue | Csa1G008520 | 2.771 | 0.00804     | Transport                    | Plasma membrane proton ATPase 4 (HA4)                         | 0.00E+00  |
| T2-L2 | blue | Csa6G514850 | 3.048 | 0.00009803  | Miscellaneous                | Cytochrome P450 family 77 subfamily B polypeptide 1 (CYP77B1) | 1.00E-241 |
| T2-L2 | blue | Csa5G604150 | 3.14  | 0.01        | Redox                        | Thioredoxin 2 (TRX2)                                          |           |
| T2-L2 | blue | Csa5G223070 | 3.216 | 0.003151    | Transcription factor         | WRKY DNA-binding protein 54 (WRKY54)                          | 3.00E-96  |
| T2-L2 | blue | Csa2G359890 | 3.289 | 3.70E-03    | Not assigned                 | unknown                                                       |           |
| T2-L2 | blue | Csa1G596520 | 3.4   | 0.0002165   | Protein degradation          | Cystein proteinases superfamily protein                       | 2.00E-168 |
| T2-L2 | blue | Csa7G395800 | 3.415 | 0.001823    | Miscellaneous                | Glutathione S-transferase phi 8 (GSTF8)                       | 3.00E-82  |
| T2-L2 | blue | Csa3G119700 | 3.575 | 0.00005376  | Transcription factor         | WRKY DNA-binding protein 53 (WRKY53)                          | 1.00E-102 |
| T2-L2 | blue | Csa6G381850 | 3.831 | 0.001156    | Transport                    | Amino acid permease 3 (AAP3)                                  | 2.00E-234 |
| T2-L2 | blue | Csa1G033160 | 4.495 | 0.006049    | Miscellaneous                | Glutathione S-transferase tau 9 (GSTU9)                       | 3.00E-68  |
| T2-L2 | blue | Csa6G486960 | 4.496 | 0.000002502 | Transcription factor         | WRKY DNA-binding protein 51 (WRKY51)                          | 1.00E-36  |
| T2-L2 | blue | Csa2G058620 | 5.345 | 0.003945    | Abiotic stress               | DNAJ heat shock N-terminal domain-containing protein          | 2.00E-137 |

Supplementary Table 1 (Continued)

|       |      |             |       |             |                              |                                                               |           |
|-------|------|-------------|-------|-------------|------------------------------|---------------------------------------------------------------|-----------|
| T2-L2 | blue | Csa1G574970 | 1.827 | 1.18E-05    | Major CHO metabolism         | Hexokinase 2 (HXK2)                                           | 7.00E-51  |
| T2-L2 | blue | Csa4G618520 | 1.837 | 0.0001765   | Biodegradation of xenobiotic | UDP glycosyltransferase (UGT)                                 | 1.00E-132 |
| T2-L2 | blue | Csa2G003610 | 1.841 | 0.0003098   | Lipid metabolism             | Abnormal inflorescence meristem (AIM1)                        | 3.00E-294 |
| T2-L2 | blue | Csa3G730930 | 1.847 | 0.00004243  | Transport                    | Ammonium transporter 2 (AMT2)                                 | 8E-220    |
| T2-L2 | blue | Csa6G493850 | 1.86  | 1.50E-05    | Not assigned                 | unknown                                                       |           |
| T2-L2 | blue | Csa3G159420 | 1.871 | 1.61E-03    | Not assigned                 | unknown                                                       |           |
| T2-L2 | blue | Csa1G528610 | 1.874 | 0.00435     | Lipid metabolism             | Thylakoid membrane anion transporter 1 (ANTR1)                | 7.00E-236 |
| T2-L2 | blue | Csa1G181360 | 1.875 | 0.001947    | Transport                    | non-intrinsic ABC protein 9 (NAP9)                            | 3.00E-156 |
| T2-L2 | blue | Csa3G154410 | 2.05  | 1.63E-10    | Not assigned                 | unknown                                                       |           |
| T2-L2 | blue | Csa3G183950 | 2.092 | 0.0004285   | Abiotic stress               | Heat shock protein 83                                         | 0.00E+00  |
| T2-L2 | blue | Csa2G296090 | 2.143 | 2.44E-04    | Not assigned                 | unknown                                                       |           |
| T2-L2 | blue | Csa7G291720 | 2.169 | 0.006566    | Lipid metabolism             | Choline kinase                                                | 4.00E-133 |
| T2-L2 | blue | Csa2G427310 | 2.238 | 0.007581    | Transcription factor         | MYB domain protein 73 (MYB73)                                 | 1.00E-88  |
| T2-L2 | blue | Csa3G881750 | 2.24  | 0.009561    | Lipid metabolism             | PR5-like receptor kinase (PR5K)                               | 4.00E-154 |
| T2-L2 | blue | Csa5G589260 | 2.243 | 0           | Amino acid metabolism        | O-acetylserine(thiol) lyase (OAS-TL)                          | 4.00E-162 |
| T2-L2 | blue | Csa3G733350 | 2.317 | 0.00004435  | Cell organization            | RHO guanyl-nucleotide exchange factor 11 (ROPGEF11)           | 9.00E-41  |
| T2-L2 | blue | Csa2G004690 | 2.522 | 0.000004593 | Transcription factor         | Heat shock transcription factor C1 (HSFC1)                    | 5.00E-67  |
| T2-L2 | blue | Csa7G387690 | 2.631 | 0.000001654 | Transport                    | Sulfate transporter 3;1 (SULTR 3;1)                           | 3.00E-307 |
| T2-L2 | blue | Csa1G008520 | 2.771 | 0.00804     | Transport                    | Plasma membrane proton ATPase 4 (HA4)                         | 0.00E+00  |
| T2-L2 | blue | Csa6G514850 | 3.048 | 0.00009803  | Miscellaneous                | Cytochrome P450 family 77 subfamily B polypeptide 1 (CYP77B1) | 1.00E-241 |
| T2-L2 | blue | Csa5G604150 | 3.14  | 0.01        | Redox                        | Thioredoxin 2 (TRX2)                                          |           |
| T2-L2 | blue | Csa5G223070 | 3.216 | 0.003151    | Transcription factor         | WRKY DNA-binding protein 54 (WRKY54)                          | 3.00E-96  |
| T2-L2 | blue | Csa2G359890 | 3.289 | 3.70E-03    | Not assigned                 | unknown                                                       |           |
| T2-L2 | blue | Csa1G596520 | 3.4   | 0.0002165   | Protein degradation          | Cystein proteinases superfamily protein                       | 2.00E-168 |
| T2-L2 | blue | Csa7G395800 | 3.415 | 0.001823    | Miscellaneous                | Glutathione S-transferase phi 8 (GSTF8)                       | 3.00E-82  |
| T2-L2 | blue | Csa3G119700 | 3.575 | 0.00005376  | Transcription factor         | WRKY DNA-binding protein 53 (WRKY53)                          | 1.00E-102 |
| T2-L2 | blue | Csa6G381850 | 3.831 | 0.001156    | Transport                    | Amino acid permease 3 (AAP3)                                  | 2.00E-234 |
| T2-L2 | blue | Csa1G033160 | 4.495 | 0.006049    | Miscellaneous                | Glutathione S-transferase tau 9 (GSTU9)                       | 3.00E-68  |
| T2-L2 | blue | Csa6G486960 | 4.496 | 0.000002502 | Transcription factor         | WRKY DNA-binding protein 51 (WRKY51)                          | 1.00E-36  |
| T2-L2 | blue | Csa2G058620 | 5.345 | 0.003945    | Abiotic stress               | DNAJ heat shock N-terminal domain-containing protein          | 2.00E-137 |



Supplementary Table 1 (Continued)

|       |      |             |       |             |                              |                                                               |           |
|-------|------|-------------|-------|-------------|------------------------------|---------------------------------------------------------------|-----------|
| T2-L2 | blue | Csa1G574970 | 1.827 | 1.18E-05    | Major CHO metabolism         | Hexokinase 2 (HXK2)                                           | 7.00E-51  |
| T2-L2 | blue | Csa4G618520 | 1.837 | 0.0001765   | Biodegradation of xenobiotic | UDP glycosyltransferase (UGT)                                 | 1.00E-132 |
| T2-L2 | blue | Csa2G003610 | 1.841 | 0.0003098   | Lipid metabolism             | Abnormal inflorescence meristem (AIM1)                        | 3.00E-294 |
| T2-L2 | blue | Csa3G730930 | 1.847 | 0.00004243  | Transport                    | Ammonium transporter 2 (AMT2)                                 | 8E-220    |
| T2-L2 | blue | Csa6G493850 | 1.86  | 1.50E-05    | Not assigned                 | unknown                                                       |           |
| T2-L2 | blue | Csa3G159420 | 1.871 | 1.61E-03    | Not assigned                 | unknown                                                       |           |
| T2-L2 | blue | Csa1G528610 | 1.874 | 0.00435     | Lipid metabolism             | Thylakoid membrane anion transporter 1 (ANTR1)                | 7.00E-236 |
| T2-L2 | blue | Csa1G181360 | 1.875 | 0.001947    | Transport                    | non-intrinsic ABC protein 9 (NAP9)                            | 3.00E-156 |
| T2-L2 | blue | Csa3G154410 | 2.05  | 1.63E-10    | Not assigned                 | unknown                                                       |           |
| T2-L2 | blue | Csa3G183950 | 2.092 | 0.0004285   | Abiotic stress               | Heat shock protein 83                                         | 0.00E+00  |
| T2-L2 | blue | Csa2G296090 | 2.143 | 2.44E-04    | Not assigned                 | unknown                                                       |           |
| T2-L2 | blue | Csa7G291720 | 2.169 | 0.006566    | Lipid metabolism             | Choline kinase                                                | 4.00E-133 |
| T2-L2 | blue | Csa2G427310 | 2.238 | 0.007581    | Transcription factor         | MYB domain protein 73 (MYB73)                                 | 1.00E-88  |
| T2-L2 | blue | Csa3G881750 | 2.24  | 0.009561    | Lipid metabolism             | PR5-like receptor kinase (PR5K)                               | 4.00E-154 |
| T2-L2 | blue | Csa5G589260 | 2.243 | 0           | Amino acid metabolism        | O-acetylserine(thiol) lyase (OAS-TL)                          | 4.00E-162 |
| T2-L2 | blue | Csa3G733350 | 2.317 | 0.00004435  | Cell organization            | RHO guanyl-nucleotide exchange factor 11 (ROPGEF11)           | 9.00E-41  |
| T2-L2 | blue | Csa2G004690 | 2.522 | 0.000004593 | Transcription factor         | Heat shock transcription factor C1 (HSFC1)                    | 5.00E-67  |
| T2-L2 | blue | Csa7G387690 | 2.631 | 0.000001654 | Transport                    | Sulfate transporter 3;1 (SULTR 3;1)                           | 3.00E-307 |
| T2-L2 | blue | Csa1G008520 | 2.771 | 0.00804     | Transport                    | Plasma membrane proton ATPase 4 (HA4)                         | 0.00E+00  |
| T2-L2 | blue | Csa6G514850 | 3.048 | 0.00009803  | Miscellaneous                | Cytochrome P450 family 77 subfamily B polypeptide 1 (CYP77B1) | 1.00E-241 |
| T2-L2 | blue | Csa5G604150 | 3.14  | 0.01        | Redox                        | Thioredoxin 2 (TRX2)                                          |           |
| T2-L2 | blue | Csa5G223070 | 3.216 | 0.003151    | Transcription factor         | WRKY DNA-binding protein 54 (WRKY54)                          | 3.00E-96  |
| T2-L2 | blue | Csa2G359890 | 3.289 | 3.70E-03    | Not assigned                 | unknown                                                       |           |
| T2-L2 | blue | Csa1G596520 | 3.4   | 0.0002165   | Protein degradation          | Cystein proteinases superfamily protein                       | 2.00E-168 |
| T2-L2 | blue | Csa7G395800 | 3.415 | 0.001823    | Miscellaneous                | Glutathione S-transferase phi 8 (GSTF8)                       | 3.00E-82  |
| T2-L2 | blue | Csa3G119700 | 3.575 | 0.00005376  | Transcription factor         | WRKY DNA-binding protein 53 (WRKY53)                          | 1.00E-102 |
| T2-L2 | blue | Csa6G381850 | 3.831 | 0.001156    | Transport                    | Amino acid permease 3 (AAP3)                                  | 2.00E-234 |
| T2-L2 | blue | Csa1G033160 | 4.495 | 0.006049    | Miscellaneous                | Glutathione S-transferase tau 9 (GSTU9)                       | 3.00E-68  |
| T2-L2 | blue | Csa6G486960 | 4.496 | 0.000002502 | Transcription factor         | WRKY DNA-binding protein 51 (WRKY51)                          | 1.00E-36  |
| T2-L2 | blue | Csa2G058620 | 5.345 | 0.003945    | Abiotic stress               | DNAJ heat shock N-terminal domain-containing protein          | 2.00E-137 |

Supplementary Table 1 (Continued)

|       |      |             |       |             |                              |                                                               |           |
|-------|------|-------------|-------|-------------|------------------------------|---------------------------------------------------------------|-----------|
| T2-L2 | blue | Csa1G574970 | 1.827 | 1.18E-05    | Major CHO metabolism         | Hexokinase 2 (HXK2)                                           | 7.00E-51  |
| T2-L2 | blue | Csa4G618520 | 1.837 | 0.0001765   | Biodegradation of xenobiotic | UDP glycosyltransferase (UGT)                                 | 1.00E-132 |
| T2-L2 | blue | Csa2G003610 | 1.841 | 0.0003098   | Lipid metabolism             | Abnormal inflorescence meristem (AIM1)                        | 3.00E-294 |
| T2-L2 | blue | Csa3G730930 | 1.847 | 0.00004243  | Transport                    | Ammonium transporter 2 (AMT2)                                 | 8E-220    |
| T2-L2 | blue | Csa6G493850 | 1.86  | 1.50E-05    | Not assigned                 | unknown                                                       |           |
| T2-L2 | blue | Csa3G159420 | 1.871 | 1.61E-03    | Not assigned                 | unknown                                                       |           |
| T2-L2 | blue | Csa1G528610 | 1.874 | 0.00435     | Lipid metabolism             | Thylakoid membrane anion transporter 1 (ANTR1)                | 7.00E-236 |
| T2-L2 | blue | Csa1G181360 | 1.875 | 0.001947    | Transport                    | non-intrinsic ABC protein 9 (NAP9)                            | 3.00E-156 |
| T2-L2 | blue | Csa3G154410 | 2.05  | 1.63E-10    | Not assigned                 | unknown                                                       |           |
| T2-L2 | blue | Csa3G183950 | 2.092 | 0.0004285   | Abiotic stress               | Heat shock protein 83                                         | 0.00E+00  |
| T2-L2 | blue | Csa2G296090 | 2.143 | 2.44E-04    | Not assigned                 | unknown                                                       |           |
| T2-L2 | blue | Csa7G291720 | 2.169 | 0.006566    | Lipid metabolism             | Choline kinase                                                | 4.00E-133 |
| T2-L2 | blue | Csa2G427310 | 2.238 | 0.007581    | Transcription factor         | MYB domain protein 73 (MYB73)                                 | 1.00E-88  |
| T2-L2 | blue | Csa3G881750 | 2.24  | 0.009561    | Lipid metabolism             | PR5-like receptor kinase (PR5K)                               | 4.00E-154 |
| T2-L2 | blue | Csa5G589260 | 2.243 | 0           | Amino acid metabolism        | O-acetylserine(thiol) lyase (OAS-TL)                          | 4.00E-162 |
| T2-L2 | blue | Csa3G733350 | 2.317 | 0.00004435  | Cell organization            | RHO guanyl-nucleotide exchange factor 11 (ROPGEF11)           | 9.00E-41  |
| T2-L2 | blue | Csa2G004690 | 2.522 | 0.000004593 | Transcription factor         | Heat shock transcription factor C1 (HSFC1)                    | 5.00E-67  |
| T2-L2 | blue | Csa7G387690 | 2.631 | 0.000001654 | Transport                    | Sulfate transporter 3;1 (SULTR 3;1)                           | 3.00E-307 |
| T2-L2 | blue | Csa1G008520 | 2.771 | 0.00804     | Transport                    | Plasma membrane proton ATPase 4 (HA4)                         | 0.00E+00  |
| T2-L2 | blue | Csa6G514850 | 3.048 | 0.00009803  | Miscellaneous                | Cytochrome P450 family 77 subfamily B polypeptide 1 (CYP77B1) | 1.00E-241 |
| T2-L2 | blue | Csa5G604150 | 3.14  | 0.01        | Redox                        | Thioredoxin 2 (TRX2)                                          |           |
| T2-L2 | blue | Csa5G223070 | 3.216 | 0.003151    | Transcription factor         | WRKY DNA-binding protein 54 (WRKY54)                          | 3.00E-96  |
| T2-L2 | blue | Csa2G359890 | 3.289 | 3.70E-03    | Not assigned                 | unknown                                                       |           |
| T2-L2 | blue | Csa1G596520 | 3.4   | 0.0002165   | Protein degradation          | Cystein proteinases superfamily protein                       | 2.00E-168 |
| T2-L2 | blue | Csa7G395800 | 3.415 | 0.001823    | Miscellaneous                | Glutathione S-transferase phi 8 (GSTF8)                       | 3.00E-82  |
| T2-L2 | blue | Csa3G119700 | 3.575 | 0.00005376  | Transcription factor         | WRKY DNA-binding protein 53 (WRKY53)                          | 1.00E-102 |
| T2-L2 | blue | Csa6G381850 | 3.831 | 0.001156    | Transport                    | Amino acid permease 3 (AAP3)                                  | 2.00E-234 |
| T2-L2 | blue | Csa1G033160 | 4.495 | 0.006049    | Miscellaneous                | Glutathione S-transferase tau 9 (GSTU9)                       | 3.00E-68  |
| T2-L2 | blue | Csa6G486960 | 4.496 | 0.000002502 | Transcription factor         | WRKY DNA-binding protein 51 (WRKY51)                          | 1.00E-36  |
| T2-L2 | blue | Csa2G058620 | 5.345 | 0.003945    | Abiotic stress               | DNAJ heat shock N-terminal domain-containing protein          | 2.00E-137 |

Supplementary Table 1 (Continued)

|       |      |             |       |             |                              |                                                               |           |
|-------|------|-------------|-------|-------------|------------------------------|---------------------------------------------------------------|-----------|
| T2-L2 | blue | Csa1G574970 | 1.827 | 1.18E-05    | Major CHO metabolism         | Hexokinase 2 (HXK2)                                           | 7.00E-51  |
| T2-L2 | blue | Csa4G618520 | 1.837 | 0.0001765   | Biodegradation of xenobiotic | UDP glycosyltransferase (UGT)                                 | 1.00E-132 |
| T2-L2 | blue | Csa2G003610 | 1.841 | 0.0003098   | Lipid metabolism             | Abnormal inflorescence meristem (AIM1)                        | 3.00E-294 |
| T2-L2 | blue | Csa3G730930 | 1.847 | 0.00004243  | Transport                    | Ammonium transporter 2 (AMT2)                                 | 8E-220    |
| T2-L2 | blue | Csa6G493850 | 1.86  | 1.50E-05    | Not assigned                 | unknown                                                       |           |
| T2-L2 | blue | Csa3G159420 | 1.871 | 1.61E-03    | Not assigned                 | unknown                                                       |           |
| T2-L2 | blue | Csa1G528610 | 1.874 | 0.00435     | Lipid metabolism             | Thylakoid membrane anion transporter 1 (ANTR1)                | 7.00E-236 |
| T2-L2 | blue | Csa1G181360 | 1.875 | 0.001947    | Transport                    | non-intrinsic ABC protein 9 (NAP9)                            | 3.00E-156 |
| T2-L2 | blue | Csa3G154410 | 2.05  | 1.63E-10    | Not assigned                 | unknown                                                       |           |
| T2-L2 | blue | Csa3G183950 | 2.092 | 0.0004285   | Abiotic stress               | Heat shock protein 83                                         | 0.00E+00  |
| T2-L2 | blue | Csa2G296090 | 2.143 | 2.44E-04    | Not assigned                 | unknown                                                       |           |
| T2-L2 | blue | Csa7G291720 | 2.169 | 0.006566    | Lipid metabolism             | Choline kinase                                                | 4.00E-133 |
| T2-L2 | blue | Csa2G427310 | 2.238 | 0.007581    | Transcription factor         | MYB domain protein 73 (MYB73)                                 | 1.00E-88  |
| T2-L2 | blue | Csa3G881750 | 2.24  | 0.009561    | Lipid metabolism             | PR5-like receptor kinase (PR5K)                               | 4.00E-154 |
| T2-L2 | blue | Csa5G589260 | 2.243 | 0           | Amino acid metabolism        | O-acetylserine(thiol) lyase (OAS-TL)                          | 4.00E-162 |
| T2-L2 | blue | Csa3G733350 | 2.317 | 0.00004435  | Cell organization            | RHO guanyl-nucleotide exchange factor 11 (ROPGEF11)           | 9.00E-41  |
| T2-L2 | blue | Csa2G004690 | 2.522 | 0.000004593 | Transcription factor         | Heat shock transcription factor C1 (HSFC1)                    | 5.00E-67  |
| T2-L2 | blue | Csa7G387690 | 2.631 | 0.000001654 | Transport                    | Sulfate transporter 3;1 (SULTR 3;1)                           | 3.00E-307 |
| T2-L2 | blue | Csa1G008520 | 2.771 | 0.00804     | Transport                    | Plasma membrane proton ATPase 4 (HA4)                         | 0.00E+00  |
| T2-L2 | blue | Csa6G514850 | 3.048 | 0.00009803  | Miscellaneous                | Cytochrome P450 family 77 subfamily B polypeptide 1 (CYP77B1) | 1.00E-241 |
| T2-L2 | blue | Csa5G604150 | 3.14  | 0.01        | Redox                        | Thioredoxin 2 (TRX2)                                          |           |
| T2-L2 | blue | Csa5G223070 | 3.216 | 0.003151    | Transcription factor         | WRKY DNA-binding protein 54 (WRKY54)                          | 3.00E-96  |
| T2-L2 | blue | Csa2G359890 | 3.289 | 3.70E-03    | Not assigned                 | unknown                                                       |           |
| T2-L2 | blue | Csa1G596520 | 3.4   | 0.0002165   | Protein degradation          | Cystein proteinases superfamily protein                       | 2.00E-168 |
| T2-L2 | blue | Csa7G395800 | 3.415 | 0.001823    | Miscellaneous                | Glutathione S-transferase phi 8 (GSTF8)                       | 3.00E-82  |
| T2-L2 | blue | Csa3G119700 | 3.575 | 0.00005376  | Transcription factor         | WRKY DNA-binding protein 53 (WRKY53)                          | 1.00E-102 |
| T2-L2 | blue | Csa6G381850 | 3.831 | 0.001156    | Transport                    | Amino acid permease 3 (AAP3)                                  | 2.00E-234 |
| T2-L2 | blue | Csa1G033160 | 4.495 | 0.006049    | Miscellaneous                | Glutathione S-transferase tau 9 (GSTU9)                       | 3.00E-68  |
| T2-L2 | blue | Csa6G486960 | 4.496 | 0.000002502 | Transcription factor         | WRKY DNA-binding protein 51 (WRKY51)                          | 1.00E-36  |
| T2-L2 | blue | Csa2G058620 | 5.345 | 0.003945    | Abiotic stress               | DNAJ heat shock N-terminal domain-containing protein          | 2.00E-137 |

Supplementary Table 1 (Continued)

|       |      |             |       |             |                              |                                                               |           |
|-------|------|-------------|-------|-------------|------------------------------|---------------------------------------------------------------|-----------|
| T2-L2 | blue | Csa1G574970 | 1.827 | 1.18E-05    | Major CHO metabolism         | Hexokinase 2 (HXK2)                                           | 7.00E-51  |
| T2-L2 | blue | Csa4G618520 | 1.837 | 0.0001765   | Biodegradation of xenobiotic | UDP glycosyltransferase (UGT)                                 | 1.00E-132 |
| T2-L2 | blue | Csa2G003610 | 1.841 | 0.0003098   | Lipid metabolism             | Abnormal inflorescence meristem (AIM1)                        | 3.00E-294 |
| T2-L2 | blue | Csa3G730930 | 1.847 | 0.00004243  | Transport                    | Ammonium transporter 2 (AMT2)                                 | 8E-220    |
| T2-L2 | blue | Csa6G493850 | 1.86  | 1.50E-05    | Not assigned                 | unknown                                                       |           |
| T2-L2 | blue | Csa3G159420 | 1.871 | 1.61E-03    | Not assigned                 | unknown                                                       |           |
| T2-L2 | blue | Csa1G528610 | 1.874 | 0.00435     | Lipid metabolism             | Thylakoid membrane anion transporter 1 (ANTR1)                | 7.00E-236 |
| T2-L2 | blue | Csa1G181360 | 1.875 | 0.001947    | Transport                    | non-intrinsic ABC protein 9 (NAP9)                            | 3.00E-156 |
| T2-L2 | blue | Csa3G154410 | 2.05  | 1.63E-10    | Not assigned                 | unknown                                                       |           |
| T2-L2 | blue | Csa3G183950 | 2.092 | 0.0004285   | Abiotic stress               | Heat shock protein 83                                         | 0.00E+00  |
| T2-L2 | blue | Csa2G296090 | 2.143 | 2.44E-04    | Not assigned                 | unknown                                                       |           |
| T2-L2 | blue | Csa7G291720 | 2.169 | 0.006566    | Lipid metabolism             | Choline kinase                                                | 4.00E-133 |
| T2-L2 | blue | Csa2G427310 | 2.238 | 0.007581    | Transcription factor         | MYB domain protein 73 (MYB73)                                 | 1.00E-88  |
| T2-L2 | blue | Csa3G881750 | 2.24  | 0.009561    | Lipid metabolism             | PR5-like receptor kinase (PR5K)                               | 4.00E-154 |
| T2-L2 | blue | Csa5G589260 | 2.243 | 0           | Amino acid metabolism        | O-acetylserine(thiol) lyase (OAS-TL)                          | 4.00E-162 |
| T2-L2 | blue | Csa3G733350 | 2.317 | 0.00004435  | Cell organization            | RHO guanyl-nucleotide exchange factor 11 (ROPGEF11)           | 9.00E-41  |
| T2-L2 | blue | Csa2G004690 | 2.522 | 0.000004593 | Transcription factor         | Heat shock transcription factor C1 (HSFC1)                    | 5.00E-67  |
| T2-L2 | blue | Csa7G387690 | 2.631 | 0.000001654 | Transport                    | Sulfate transporter 3;1 (SULTR 3;1)                           | 3.00E-307 |
| T2-L2 | blue | Csa1G008520 | 2.771 | 0.00804     | Transport                    | Plasma membrane proton ATPase 4 (HA4)                         | 0.00E+00  |
| T2-L2 | blue | Csa6G514850 | 3.048 | 0.00009803  | Miscellaneous                | Cytochrome P450 family 77 subfamily B polypeptide 1 (CYP77B1) | 1.00E-241 |
| T2-L2 | blue | Csa5G604150 | 3.14  | 0.01        | Redox                        | Thioredoxin 2 (TRX2)                                          |           |
| T2-L2 | blue | Csa5G223070 | 3.216 | 0.003151    | Transcription factor         | WRKY DNA-binding protein 54 (WRKY54)                          | 3.00E-96  |
| T2-L2 | blue | Csa2G359890 | 3.289 | 3.70E-03    | Not assigned                 | unknown                                                       |           |
| T2-L2 | blue | Csa1G596520 | 3.4   | 0.0002165   | Protein degradation          | Cystein proteinases superfamily protein                       | 2.00E-168 |
| T2-L2 | blue | Csa7G395800 | 3.415 | 0.001823    | Miscellaneous                | Glutathione S-transferase phi 8 (GSTF8)                       | 3.00E-82  |
| T2-L2 | blue | Csa3G119700 | 3.575 | 0.00005376  | Transcription factor         | WRKY DNA-binding protein 53 (WRKY53)                          | 1.00E-102 |
| T2-L2 | blue | Csa6G381850 | 3.831 | 0.001156    | Transport                    | Amino acid permease 3 (AAP3)                                  | 2.00E-234 |
| T2-L2 | blue | Csa1G033160 | 4.495 | 0.006049    | Miscellaneous                | Glutathione S-transferase tau 9 (GSTU9)                       | 3.00E-68  |
| T2-L2 | blue | Csa6G486960 | 4.496 | 0.000002502 | Transcription factor         | WRKY DNA-binding protein 51 (WRKY51)                          | 1.00E-36  |
| T2-L2 | blue | Csa2G058620 | 5.345 | 0.003945    | Abiotic stress               | DNAJ heat shock N-terminal domain-containing protein          | 2.00E-137 |

Supplementary Table 1 (Continued)

|       |      |             |       |             |                              |                                                               |           |
|-------|------|-------------|-------|-------------|------------------------------|---------------------------------------------------------------|-----------|
| T2-L2 | blue | Csa1G574970 | 1.827 | 1.18E-05    | Major CHO metabolism         | Hexokinase 2 (HXK2)                                           | 7.00E-51  |
| T2-L2 | blue | Csa4G618520 | 1.837 | 0.0001765   | Biodegradation of xenobiotic | UDP glycosyltransferase (UGT)                                 | 1.00E-132 |
| T2-L2 | blue | Csa2G003610 | 1.841 | 0.0003098   | Lipid metabolism             | Abnormal inflorescence meristem (AIM1)                        | 3.00E-294 |
| T2-L2 | blue | Csa3G730930 | 1.847 | 0.00004243  | Transport                    | Ammonium transporter 2 (AMT2)                                 | 8E-220    |
| T2-L2 | blue | Csa6G493850 | 1.86  | 1.50E-05    | Not assigned                 | unknown                                                       |           |
| T2-L2 | blue | Csa3G159420 | 1.871 | 1.61E-03    | Not assigned                 | unknown                                                       |           |
| T2-L2 | blue | Csa1G528610 | 1.874 | 0.00435     | Lipid metabolism             | Thylakoid membrane anion transporter 1 (ANTR1)                | 7.00E-236 |
| T2-L2 | blue | Csa1G181360 | 1.875 | 0.001947    | Transport                    | non-intrinsic ABC protein 9 (NAP9)                            | 3.00E-156 |
| T2-L2 | blue | Csa3G154410 | 2.05  | 1.63E-10    | Not assigned                 | unknown                                                       |           |
| T2-L2 | blue | Csa3G183950 | 2.092 | 0.0004285   | Abiotic stress               | Heat shock protein 83                                         | 0.00E+00  |
| T2-L2 | blue | Csa2G296090 | 2.143 | 2.44E-04    | Not assigned                 | unknown                                                       |           |
| T2-L2 | blue | Csa7G291720 | 2.169 | 0.006566    | Lipid metabolism             | Choline kinase                                                | 4.00E-133 |
| T2-L2 | blue | Csa2G427310 | 2.238 | 0.007581    | Transcription factor         | MYB domain protein 73 (MYB73)                                 | 1.00E-88  |
| T2-L2 | blue | Csa3G881750 | 2.24  | 0.009561    | Lipid metabolism             | PR5-like receptor kinase (PR5K)                               | 4.00E-154 |
| T2-L2 | blue | Csa5G589260 | 2.243 | 0           | Amino acid metabolism        | O-acetylserine(thiol) lyase (OAS-TL)                          | 4.00E-162 |
| T2-L2 | blue | Csa3G733350 | 2.317 | 0.00004435  | Cell organization            | RHO guanyl-nucleotide exchange factor 11 (ROPGEF11)           | 9.00E-41  |
| T2-L2 | blue | Csa2G004690 | 2.522 | 0.000004593 | Transcription factor         | Heat shock transcription factor C1 (HSFC1)                    | 5.00E-67  |
| T2-L2 | blue | Csa7G387690 | 2.631 | 0.000001654 | Transport                    | Sulfate transporter 3;1 (SULTR 3;1)                           | 3.00E-307 |
| T2-L2 | blue | Csa1G008520 | 2.771 | 0.00804     | Transport                    | Plasma membrane proton ATPase 4 (HA4)                         | 0.00E+00  |
| T2-L2 | blue | Csa6G514850 | 3.048 | 0.00009803  | Miscellaneous                | Cytochrome P450 family 77 subfamily B polypeptide 1 (CYP77B1) | 1.00E-241 |
| T2-L2 | blue | Csa5G604150 | 3.14  | 0.01        | Redox                        | Thioredoxin 2 (TRX2)                                          |           |
| T2-L2 | blue | Csa5G223070 | 3.216 | 0.003151    | Transcription factor         | WRKY DNA-binding protein 54 (WRKY54)                          | 3.00E-96  |
| T2-L2 | blue | Csa2G359890 | 3.289 | 3.70E-03    | Not assigned                 | unknown                                                       |           |
| T2-L2 | blue | Csa1G596520 | 3.4   | 0.0002165   | Protein degradation          | Cystein proteinases superfamily protein                       | 2.00E-168 |
| T2-L2 | blue | Csa7G395800 | 3.415 | 0.001823    | Miscellaneous                | Glutathione S-transferase phi 8 (GSTF8)                       | 3.00E-82  |
| T2-L2 | blue | Csa3G119700 | 3.575 | 0.00005376  | Transcription factor         | WRKY DNA-binding protein 53 (WRKY53)                          | 1.00E-102 |
| T2-L2 | blue | Csa6G381850 | 3.831 | 0.001156    | Transport                    | Amino acid permease 3 (AAP3)                                  | 2.00E-234 |
| T2-L2 | blue | Csa1G033160 | 4.495 | 0.006049    | Miscellaneous                | Glutathione S-transferase tau 9 (GSTU9)                       | 3.00E-68  |
| T2-L2 | blue | Csa6G486960 | 4.496 | 0.000002502 | Transcription factor         | WRKY DNA-binding protein 51 (WRKY51)                          | 1.00E-36  |
| T2-L2 | blue | Csa2G058620 | 5.345 | 0.003945    | Abiotic stress               | DNAJ heat shock N-terminal domain-containing protein          | 2.00E-137 |

Supplementary Table 1 (Continued)

|       |      |             |       |             |                              |                                                               |           |
|-------|------|-------------|-------|-------------|------------------------------|---------------------------------------------------------------|-----------|
| T2-L2 | blue | Csa1G574970 | 1.827 | 1.18E-05    | Major CHO metabolism         | Hexokinase 2 (HXK2)                                           | 7.00E-51  |
| T2-L2 | blue | Csa4G618520 | 1.837 | 0.0001765   | Biodegradation of xenobiotic | UDP glycosyltransferase (UGT)                                 | 1.00E-132 |
| T2-L2 | blue | Csa2G003610 | 1.841 | 0.0003098   | Lipid metabolism             | Abnormal inflorescence meristem (AIM1)                        | 3.00E-294 |
| T2-L2 | blue | Csa3G730930 | 1.847 | 0.00004243  | Transport                    | Ammonium transporter 2 (AMT2)                                 | 8E-220    |
| T2-L2 | blue | Csa6G493850 | 1.86  | 1.50E-05    | Not assigned                 | unknown                                                       |           |
| T2-L2 | blue | Csa3G159420 | 1.871 | 1.61E-03    | Not assigned                 | unknown                                                       |           |
| T2-L2 | blue | Csa1G528610 | 1.874 | 0.00435     | Lipid metabolism             | Thylakoid membrane anion transporter 1 (ANTR1)                | 7.00E-236 |
| T2-L2 | blue | Csa1G181360 | 1.875 | 0.001947    | Transport                    | non-intrinsic ABC protein 9 (NAP9)                            | 3.00E-156 |
| T2-L2 | blue | Csa3G154410 | 2.05  | 1.63E-10    | Not assigned                 | unknown                                                       |           |
| T2-L2 | blue | Csa3G183950 | 2.092 | 0.0004285   | Abiotic stress               | Heat shock protein 83                                         | 0.00E+00  |
| T2-L2 | blue | Csa2G296090 | 2.143 | 2.44E-04    | Not assigned                 | unknown                                                       |           |
| T2-L2 | blue | Csa7G291720 | 2.169 | 0.006566    | Lipid metabolism             | Choline kinase                                                | 4.00E-133 |
| T2-L2 | blue | Csa2G427310 | 2.238 | 0.007581    | Transcription factor         | MYB domain protein 73 (MYB73)                                 | 1.00E-88  |
| T2-L2 | blue | Csa3G881750 | 2.24  | 0.009561    | Lipid metabolism             | PR5-like receptor kinase (PR5K)                               | 4.00E-154 |
| T2-L2 | blue | Csa5G589260 | 2.243 | 0           | Amino acid metabolism        | O-acetylserine(thiol) lyase (OAS-TL)                          | 4.00E-162 |
| T2-L2 | blue | Csa3G733350 | 2.317 | 0.00004435  | Cell organization            | RHO guanyl-nucleotide exchange factor 11 (ROPGEF11)           | 9.00E-41  |
| T2-L2 | blue | Csa2G004690 | 2.522 | 0.000004593 | Transcription factor         | Heat shock transcription factor C1 (HSFC1)                    | 5.00E-67  |
| T2-L2 | blue | Csa7G387690 | 2.631 | 0.000001654 | Transport                    | Sulfate transporter 3;1 (SULTR 3;1)                           | 3.00E-307 |
| T2-L2 | blue | Csa1G008520 | 2.771 | 0.00804     | Transport                    | Plasma membrane proton ATPase 4 (HA4)                         | 0.00E+00  |
| T2-L2 | blue | Csa6G514850 | 3.048 | 0.00009803  | Miscellaneous                | Cytochrome P450 family 77 subfamily B polypeptide 1 (CYP77B1) | 1.00E-241 |
| T2-L2 | blue | Csa5G604150 | 3.14  | 0.01        | Redox                        | Thioredoxin 2 (TRX2)                                          |           |
| T2-L2 | blue | Csa5G223070 | 3.216 | 0.003151    | Transcription factor         | WRKY DNA-binding protein 54 (WRKY54)                          | 3.00E-96  |
| T2-L2 | blue | Csa2G359890 | 3.289 | 3.70E-03    | Not assigned                 | unknown                                                       |           |
| T2-L2 | blue | Csa1G596520 | 3.4   | 0.0002165   | Protein degradation          | Cystein proteinases superfamily protein                       | 2.00E-168 |
| T2-L2 | blue | Csa7G395800 | 3.415 | 0.001823    | Miscellaneous                | Glutathione S-transferase phi 8 (GSTF8)                       | 3.00E-82  |
| T2-L2 | blue | Csa3G119700 | 3.575 | 0.00005376  | Transcription factor         | WRKY DNA-binding protein 53 (WRKY53)                          | 1.00E-102 |
| T2-L2 | blue | Csa6G381850 | 3.831 | 0.001156    | Transport                    | Amino acid permease 3 (AAP3)                                  | 2.00E-234 |
| T2-L2 | blue | Csa1G033160 | 4.495 | 0.006049    | Miscellaneous                | Glutathione S-transferase tau 9 (GSTU9)                       | 3.00E-68  |
| T2-L2 | blue | Csa6G486960 | 4.496 | 0.000002502 | Transcription factor         | WRKY DNA-binding protein 51 (WRKY51)                          | 1.00E-36  |
| T2-L2 | blue | Csa2G058620 | 5.345 | 0.003945    | Abiotic stress               | DNAJ heat shock N-terminal domain-containing protein          | 2.00E-137 |

Supplementary Table 1 (Continued)

|       |      |             |       |             |                              |                                                               |           |
|-------|------|-------------|-------|-------------|------------------------------|---------------------------------------------------------------|-----------|
| T2-L2 | blue | Csa1G574970 | 1.827 | 1.18E-05    | Major CHO metabolism         | Hexokinase 2 (HXK2)                                           | 7.00E-51  |
| T2-L2 | blue | Csa4G618520 | 1.837 | 0.0001765   | Biodegradation of xenobiotic | UDP glycosyltransferase (UGT)                                 | 1.00E-132 |
| T2-L2 | blue | Csa2G003610 | 1.841 | 0.0003098   | Lipid metabolism             | Abnormal inflorescence meristem (AIM1)                        | 3.00E-294 |
| T2-L2 | blue | Csa3G730930 | 1.847 | 0.00004243  | Transport                    | Ammonium transporter 2 (AMT2)                                 | 8E-220    |
| T2-L2 | blue | Csa6G493850 | 1.86  | 1.50E-05    | Not assigned                 | unknown                                                       |           |
| T2-L2 | blue | Csa3G159420 | 1.871 | 1.61E-03    | Not assigned                 | unknown                                                       |           |
| T2-L2 | blue | Csa1G528610 | 1.874 | 0.00435     | Lipid metabolism             | Thylakoid membrane anion transporter 1 (ANTR1)                | 7.00E-236 |
| T2-L2 | blue | Csa1G181360 | 1.875 | 0.001947    | Transport                    | non-intrinsic ABC protein 9 (NAP9)                            | 3.00E-156 |
| T2-L2 | blue | Csa3G154410 | 2.05  | 1.63E-10    | Not assigned                 | unknown                                                       |           |
| T2-L2 | blue | Csa3G183950 | 2.092 | 0.0004285   | Abiotic stress               | Heat shock protein 83                                         | 0.00E+00  |
| T2-L2 | blue | Csa2G296090 | 2.143 | 2.44E-04    | Not assigned                 | unknown                                                       |           |
| T2-L2 | blue | Csa7G291720 | 2.169 | 0.006566    | Lipid metabolism             | Choline kinase                                                | 4.00E-133 |
| T2-L2 | blue | Csa2G427310 | 2.238 | 0.007581    | Transcription factor         | MYB domain protein 73 (MYB73)                                 | 1.00E-88  |
| T2-L2 | blue | Csa3G881750 | 2.24  | 0.009561    | Lipid metabolism             | PR5-like receptor kinase (PR5K)                               | 4.00E-154 |
| T2-L2 | blue | Csa5G589260 | 2.243 | 0           | Amino acid metabolism        | O-acetylserine(thiol) lyase (OAS-TL)                          | 4.00E-162 |
| T2-L2 | blue | Csa3G733350 | 2.317 | 0.00004435  | Cell organization            | RHO guanyl-nucleotide exchange factor 11 (ROPGEF11)           | 9.00E-41  |
| T2-L2 | blue | Csa2G004690 | 2.522 | 0.000004593 | Transcription factor         | Heat shock transcription factor C1 (HSFC1)                    | 5.00E-67  |
| T2-L2 | blue | Csa7G387690 | 2.631 | 0.000001654 | Transport                    | Sulfate transporter 3;1 (SULTR 3;1)                           | 3.00E-307 |
| T2-L2 | blue | Csa1G008520 | 2.771 | 0.00804     | Transport                    | Plasma membrane proton ATPase 4 (HA4)                         | 0.00E+00  |
| T2-L2 | blue | Csa6G514850 | 3.048 | 0.00009803  | Miscellaneous                | Cytochrome P450 family 77 subfamily B polypeptide 1 (CYP77B1) | 1.00E-241 |
| T2-L2 | blue | Csa5G604150 | 3.14  | 0.01        | Redox                        | Thioredoxin 2 (TRX2)                                          |           |
| T2-L2 | blue | Csa5G223070 | 3.216 | 0.003151    | Transcription factor         | WRKY DNA-binding protein 54 (WRKY54)                          | 3.00E-96  |
| T2-L2 | blue | Csa2G359890 | 3.289 | 3.70E-03    | Not assigned                 | unknown                                                       |           |
| T2-L2 | blue | Csa1G596520 | 3.4   | 0.0002165   | Protein degradation          | Cystein proteinases superfamily protein                       | 2.00E-168 |
| T2-L2 | blue | Csa7G395800 | 3.415 | 0.001823    | Miscellaneous                | Glutathione S-transferase phi 8 (GSTF8)                       | 3.00E-82  |
| T2-L2 | blue | Csa3G119700 | 3.575 | 0.00005376  | Transcription factor         | WRKY DNA-binding protein 53 (WRKY53)                          | 1.00E-102 |
| T2-L2 | blue | Csa6G381850 | 3.831 | 0.001156    | Transport                    | Amino acid permease 3 (AAP3)                                  | 2.00E-234 |
| T2-L2 | blue | Csa1G033160 | 4.495 | 0.006049    | Miscellaneous                | Glutathione S-transferase tau 9 (GSTU9)                       | 3.00E-68  |
| T2-L2 | blue | Csa6G486960 | 4.496 | 0.000002502 | Transcription factor         | WRKY DNA-binding protein 51 (WRKY51)                          | 1.00E-36  |
| T2-L2 | blue | Csa2G058620 | 5.345 | 0.003945    | Abiotic stress               | DNAJ heat shock N-terminal domain-containing protein          | 2.00E-137 |

Supplementary Table 1 (Continued)

|       |      |             |       |             |                              |                                                               |           |
|-------|------|-------------|-------|-------------|------------------------------|---------------------------------------------------------------|-----------|
| T2-L2 | blue | Csa1G574970 | 1.827 | 1.18E-05    | Major CHO metabolism         | Hexokinase 2 (HXK2)                                           | 7.00E-51  |
| T2-L2 | blue | Csa4G618520 | 1.837 | 0.0001765   | Biodegradation of xenobiotic | UDP glycosyltransferase (UGT)                                 | 1.00E-132 |
| T2-L2 | blue | Csa2G003610 | 1.841 | 0.0003098   | Lipid metabolism             | Abnormal inflorescence meristem (AIM1)                        | 3.00E-294 |
| T2-L2 | blue | Csa3G730930 | 1.847 | 0.00004243  | Transport                    | Ammonium transporter 2 (AMT2)                                 | 8E-220    |
| T2-L2 | blue | Csa6G493850 | 1.86  | 1.50E-05    | Not assigned                 | unknown                                                       |           |
| T2-L2 | blue | Csa3G159420 | 1.871 | 1.61E-03    | Not assigned                 | unknown                                                       |           |
| T2-L2 | blue | Csa1G528610 | 1.874 | 0.00435     | Lipid metabolism             | Thylakoid membrane anion transporter 1 (ANTR1)                | 7.00E-236 |
| T2-L2 | blue | Csa1G181360 | 1.875 | 0.001947    | Transport                    | non-intrinsic ABC protein 9 (NAP9)                            | 3.00E-156 |
| T2-L2 | blue | Csa3G154410 | 2.05  | 1.63E-10    | Not assigned                 | unknown                                                       |           |
| T2-L2 | blue | Csa3G183950 | 2.092 | 0.0004285   | Abiotic stress               | Heat shock protein 83                                         | 0.00E+00  |
| T2-L2 | blue | Csa2G296090 | 2.143 | 2.44E-04    | Not assigned                 | unknown                                                       |           |
| T2-L2 | blue | Csa7G291720 | 2.169 | 0.006566    | Lipid metabolism             | Choline kinase                                                | 4.00E-133 |
| T2-L2 | blue | Csa2G427310 | 2.238 | 0.007581    | Transcription factor         | MYB domain protein 73 (MYB73)                                 | 1.00E-88  |
| T2-L2 | blue | Csa3G881750 | 2.24  | 0.009561    | Lipid metabolism             | PR5-like receptor kinase (PR5K)                               | 4.00E-154 |
| T2-L2 | blue | Csa5G589260 | 2.243 | 0           | Amino acid metabolism        | O-acetylserine(thiol) lyase (OAS-TL)                          | 4.00E-162 |
| T2-L2 | blue | Csa3G733350 | 2.317 | 0.00004435  | Cell organization            | RHO guanyl-nucleotide exchange factor 11 (ROPGEF11)           | 9.00E-41  |
| T2-L2 | blue | Csa2G004690 | 2.522 | 0.000004593 | Transcription factor         | Heat shock transcription factor C1 (HSFC1)                    | 5.00E-67  |
| T2-L2 | blue | Csa7G387690 | 2.631 | 0.000001654 | Transport                    | Sulfate transporter 3;1 (SULTR 3;1)                           | 3.00E-307 |
| T2-L2 | blue | Csa1G008520 | 2.771 | 0.00804     | Transport                    | Plasma membrane proton ATPase 4 (HA4)                         | 0.00E+00  |
| T2-L2 | blue | Csa6G514850 | 3.048 | 0.00009803  | Miscellaneous                | Cytochrome P450 family 77 subfamily B polypeptide 1 (CYP77B1) | 1.00E-241 |
| T2-L2 | blue | Csa5G604150 | 3.14  | 0.01        | Redox                        | Thioredoxin 2 (TRX2)                                          |           |
| T2-L2 | blue | Csa5G223070 | 3.216 | 0.003151    | Transcription factor         | WRKY DNA-binding protein 54 (WRKY54)                          | 3.00E-96  |
| T2-L2 | blue | Csa2G359890 | 3.289 | 3.70E-03    | Not assigned                 | unknown                                                       |           |
| T2-L2 | blue | Csa1G596520 | 3.4   | 0.0002165   | Protein degradation          | Cystein proteinases superfamily protein                       | 2.00E-168 |
| T2-L2 | blue | Csa7G395800 | 3.415 | 0.001823    | Miscellaneous                | Glutathione S-transferase phi 8 (GSTF8)                       | 3.00E-82  |
| T2-L2 | blue | Csa3G119700 | 3.575 | 0.00005376  | Transcription factor         | WRKY DNA-binding protein 53 (WRKY53)                          | 1.00E-102 |
| T2-L2 | blue | Csa6G381850 | 3.831 | 0.001156    | Transport                    | Amino acid permease 3 (AAP3)                                  | 2.00E-234 |
| T2-L2 | blue | Csa1G033160 | 4.495 | 0.006049    | Miscellaneous                | Glutathione S-transferase tau 9 (GSTU9)                       | 3.00E-68  |
| T2-L2 | blue | Csa6G486960 | 4.496 | 0.000002502 | Transcription factor         | WRKY DNA-binding protein 51 (WRKY51)                          | 1.00E-36  |
| T2-L2 | blue | Csa2G058620 | 5.345 | 0.003945    | Abiotic stress               | DNAJ heat shock N-terminal domain-containing protein          | 2.00E-137 |



Supplementary Table 1 (Continued)

|       |      |             |       |             |                              |                                                               |           |
|-------|------|-------------|-------|-------------|------------------------------|---------------------------------------------------------------|-----------|
| T2-L2 | blue | Csa1G574970 | 1.827 | 1.18E-05    | Major CHO metabolism         | Hexokinase 2 (HXK2)                                           | 7.00E-51  |
| T2-L2 | blue | Csa4G618520 | 1.837 | 0.0001765   | Biodegradation of xenobiotic | UDP glycosyltransferase (UGT)                                 | 1.00E-132 |
| T2-L2 | blue | Csa2G003610 | 1.841 | 0.0003098   | Lipid metabolism             | Abnormal inflorescence meristem (AIM1)                        | 3.00E-294 |
| T2-L2 | blue | Csa3G730930 | 1.847 | 0.00004243  | Transport                    | Ammonium transporter 2 (AMT2)                                 | 8E-220    |
| T2-L2 | blue | Csa6G493850 | 1.86  | 1.50E-05    | Not assigned                 | unknown                                                       |           |
| T2-L2 | blue | Csa3G159420 | 1.871 | 1.61E-03    | Not assigned                 | unknown                                                       |           |
| T2-L2 | blue | Csa1G528610 | 1.874 | 0.00435     | Lipid metabolism             | Thylakoid membrane anion transporter 1 (ANTR1)                | 7.00E-236 |
| T2-L2 | blue | Csa1G181360 | 1.875 | 0.001947    | Transport                    | non-intrinsic ABC protein 9 (NAP9)                            | 3.00E-156 |
| T2-L2 | blue | Csa3G154410 | 2.05  | 1.63E-10    | Not assigned                 | unknown                                                       |           |
| T2-L2 | blue | Csa3G183950 | 2.092 | 0.0004285   | Abiotic stress               | Heat shock protein 83                                         | 0.00E+00  |
| T2-L2 | blue | Csa2G296090 | 2.143 | 2.44E-04    | Not assigned                 | unknown                                                       |           |
| T2-L2 | blue | Csa7G291720 | 2.169 | 0.006566    | Lipid metabolism             | Choline kinase                                                | 4.00E-133 |
| T2-L2 | blue | Csa2G427310 | 2.238 | 0.007581    | Transcription factor         | MYB domain protein 73 (MYB73)                                 | 1.00E-88  |
| T2-L2 | blue | Csa3G881750 | 2.24  | 0.009561    | Lipid metabolism             | PR5-like receptor kinase (PR5K)                               | 4.00E-154 |
| T2-L2 | blue | Csa5G589260 | 2.243 | 0           | Amino acid metabolism        | O-acetylserine(thiol) lyase (OAS-TL)                          | 4.00E-162 |
| T2-L2 | blue | Csa3G733350 | 2.317 | 0.00004435  | Cell organization            | RHO guanyl-nucleotide exchange factor 11 (ROPGEF11)           | 9.00E-41  |
| T2-L2 | blue | Csa2G004690 | 2.522 | 0.000004593 | Transcription factor         | Heat shock transcription factor C1 (HSFC1)                    | 5.00E-67  |
| T2-L2 | blue | Csa7G387690 | 2.631 | 0.000001654 | Transport                    | Sulfate transporter 3;1 (SULTR 3;1)                           | 3.00E-307 |
| T2-L2 | blue | Csa1G008520 | 2.771 | 0.00804     | Transport                    | Plasma membrane proton ATPase 4 (HA4)                         | 0.00E+00  |
| T2-L2 | blue | Csa6G514850 | 3.048 | 0.00009803  | Miscellaneous                | Cytochrome P450 family 77 subfamily B polypeptide 1 (CYP77B1) | 1.00E-241 |
| T2-L2 | blue | Csa5G604150 | 3.14  | 0.01        | Redox                        | Thioredoxin 2 (TRX2)                                          |           |
| T2-L2 | blue | Csa5G223070 | 3.216 | 0.003151    | Transcription factor         | WRKY DNA-binding protein 54 (WRKY54)                          | 3.00E-96  |
| T2-L2 | blue | Csa2G359890 | 3.289 | 3.70E-03    | Not assigned                 | unknown                                                       |           |
| T2-L2 | blue | Csa1G596520 | 3.4   | 0.0002165   | Protein degradation          | Cystein proteinases superfamily protein                       | 2.00E-168 |
| T2-L2 | blue | Csa7G395800 | 3.415 | 0.001823    | Miscellaneous                | Glutathione S-transferase phi 8 (GSTF8)                       | 3.00E-82  |
| T2-L2 | blue | Csa3G119700 | 3.575 | 0.00005376  | Transcription factor         | WRKY DNA-binding protein 53 (WRKY53)                          | 1.00E-102 |
| T2-L2 | blue | Csa6G381850 | 3.831 | 0.001156    | Transport                    | Amino acid permease 3 (AAP3)                                  | 2.00E-234 |
| T2-L2 | blue | Csa1G033160 | 4.495 | 0.006049    | Miscellaneous                | Glutathione S-transferase tau 9 (GSTU9)                       | 3.00E-68  |
| T2-L2 | blue | Csa6G486960 | 4.496 | 0.000002502 | Transcription factor         | WRKY DNA-binding protein 51 (WRKY51)                          | 1.00E-36  |
| T2-L2 | blue | Csa2G058620 | 5.345 | 0.003945    | Abiotic stress               | DNAJ heat shock N-terminal domain-containing protein          | 2.00E-137 |

Supplementary Table 1 (Continued)

|       |      |             |       |             |                              |                                                               |           |
|-------|------|-------------|-------|-------------|------------------------------|---------------------------------------------------------------|-----------|
| T2-L2 | blue | Csa1G574970 | 1.827 | 1.18E-05    | Major CHO metabolism         | Hexokinase 2 (HXK2)                                           | 7.00E-51  |
| T2-L2 | blue | Csa4G618520 | 1.837 | 0.0001765   | Biodegradation of xenobiotic | UDP glycosyltransferase (UGT)                                 | 1.00E-132 |
| T2-L2 | blue | Csa2G003610 | 1.841 | 0.0003098   | Lipid metabolism             | Abnormal inflorescence meristem (AIM1)                        | 3.00E-294 |
| T2-L2 | blue | Csa3G730930 | 1.847 | 0.00004243  | Transport                    | Ammonium transporter 2 (AMT2)                                 | 8E-220    |
| T2-L2 | blue | Csa6G493850 | 1.86  | 1.50E-05    | Not assigned                 | unknown                                                       |           |
| T2-L2 | blue | Csa3G159420 | 1.871 | 1.61E-03    | Not assigned                 | unknown                                                       |           |
| T2-L2 | blue | Csa1G528610 | 1.874 | 0.00435     | Lipid metabolism             | Thylakoid membrane anion transporter 1 (ANTR1)                | 7.00E-236 |
| T2-L2 | blue | Csa1G181360 | 1.875 | 0.001947    | Transport                    | non-intrinsic ABC protein 9 (NAP9)                            | 3.00E-156 |
| T2-L2 | blue | Csa3G154410 | 2.05  | 1.63E-10    | Not assigned                 | unknown                                                       |           |
| T2-L2 | blue | Csa3G183950 | 2.092 | 0.0004285   | Abiotic stress               | Heat shock protein 83                                         | 0.00E+00  |
| T2-L2 | blue | Csa2G296090 | 2.143 | 2.44E-04    | Not assigned                 | unknown                                                       |           |
| T2-L2 | blue | Csa7G291720 | 2.169 | 0.006566    | Lipid metabolism             | Choline kinase                                                | 4.00E-133 |
| T2-L2 | blue | Csa2G427310 | 2.238 | 0.007581    | Transcription factor         | MYB domain protein 73 (MYB73)                                 | 1.00E-88  |
| T2-L2 | blue | Csa3G881750 | 2.24  | 0.009561    | Lipid metabolism             | PR5-like receptor kinase (PR5K)                               | 4.00E-154 |
| T2-L2 | blue | Csa5G589260 | 2.243 | 0           | Amino acid metabolism        | O-acetylserine(thiol) lyase (OAS-TL)                          | 4.00E-162 |
| T2-L2 | blue | Csa3G733350 | 2.317 | 0.00004435  | Cell organization            | RHO guanyl-nucleotide exchange factor 11 (ROPGEF11)           | 9.00E-41  |
| T2-L2 | blue | Csa2G004690 | 2.522 | 0.000004593 | Transcription factor         | Heat shock transcription factor C1 (HSFC1)                    | 5.00E-67  |
| T2-L2 | blue | Csa7G387690 | 2.631 | 0.000001654 | Transport                    | Sulfate transporter 3;1 (SULTR 3;1)                           | 3.00E-307 |
| T2-L2 | blue | Csa1G008520 | 2.771 | 0.00804     | Transport                    | Plasma membrane proton ATPase 4 (HA4)                         | 0.00E+00  |
| T2-L2 | blue | Csa6G514850 | 3.048 | 0.00009803  | Miscellaneous                | Cytochrome P450 family 77 subfamily B polypeptide 1 (CYP77B1) | 1.00E-241 |
| T2-L2 | blue | Csa5G604150 | 3.14  | 0.01        | Redox                        | Thioredoxin 2 (TRX2)                                          |           |
| T2-L2 | blue | Csa5G223070 | 3.216 | 0.003151    | Transcription factor         | WRKY DNA-binding protein 54 (WRKY54)                          | 3.00E-96  |
| T2-L2 | blue | Csa2G359890 | 3.289 | 3.70E-03    | Not assigned                 | unknown                                                       |           |
| T2-L2 | blue | Csa1G596520 | 3.4   | 0.0002165   | Protein degradation          | Cystein proteinases superfamily protein                       | 2.00E-168 |
| T2-L2 | blue | Csa7G395800 | 3.415 | 0.001823    | Miscellaneous                | Glutathione S-transferase phi 8 (GSTF8)                       | 3.00E-82  |
| T2-L2 | blue | Csa3G119700 | 3.575 | 0.00005376  | Transcription factor         | WRKY DNA-binding protein 53 (WRKY53)                          | 1.00E-102 |
| T2-L2 | blue | Csa6G381850 | 3.831 | 0.001156    | Transport                    | Amino acid permease 3 (AAP3)                                  | 2.00E-234 |
| T2-L2 | blue | Csa1G033160 | 4.495 | 0.006049    | Miscellaneous                | Glutathione S-transferase tau 9 (GSTU9)                       | 3.00E-68  |
| T2-L2 | blue | Csa6G486960 | 4.496 | 0.000002502 | Transcription factor         | WRKY DNA-binding protein 51 (WRKY51)                          | 1.00E-36  |
| T2-L2 | blue | Csa2G058620 | 5.345 | 0.003945    | Abiotic stress               | DNAJ heat shock N-terminal domain-containing protein          | 2.00E-137 |

Supplementary Table 1 (Continued)

|       |      |             |       |             |                              |                                                               |           |
|-------|------|-------------|-------|-------------|------------------------------|---------------------------------------------------------------|-----------|
| T2-L2 | blue | Csa1G574970 | 1.827 | 1.18E-05    | Major CHO metabolism         | Hexokinase 2 (HXK2)                                           | 7.00E-51  |
| T2-L2 | blue | Csa4G618520 | 1.837 | 0.0001765   | Biodegradation of xenobiotic | UDP glycosyltransferase (UGT)                                 | 1.00E-132 |
| T2-L2 | blue | Csa2G003610 | 1.841 | 0.0003098   | Lipid metabolism             | Abnormal inflorescence meristem (AIM1)                        | 3.00E-294 |
| T2-L2 | blue | Csa3G730930 | 1.847 | 0.00004243  | Transport                    | Ammonium transporter 2 (AMT2)                                 | 8E-220    |
| T2-L2 | blue | Csa6G493850 | 1.86  | 1.50E-05    | Not assigned                 | unknown                                                       |           |
| T2-L2 | blue | Csa3G159420 | 1.871 | 1.61E-03    | Not assigned                 | unknown                                                       |           |
| T2-L2 | blue | Csa1G528610 | 1.874 | 0.00435     | Lipid metabolism             | Thylakoid membrane anion transporter 1 (ANTR1)                | 7.00E-236 |
| T2-L2 | blue | Csa1G181360 | 1.875 | 0.001947    | Transport                    | non-intrinsic ABC protein 9 (NAP9)                            | 3.00E-156 |
| T2-L2 | blue | Csa3G154410 | 2.05  | 1.63E-10    | Not assigned                 | unknown                                                       |           |
| T2-L2 | blue | Csa3G183950 | 2.092 | 0.0004285   | Abiotic stress               | Heat shock protein 83                                         | 0.00E+00  |
| T2-L2 | blue | Csa2G296090 | 2.143 | 2.44E-04    | Not assigned                 | unknown                                                       |           |
| T2-L2 | blue | Csa7G291720 | 2.169 | 0.006566    | Lipid metabolism             | Choline kinase                                                | 4.00E-133 |
| T2-L2 | blue | Csa2G427310 | 2.238 | 0.007581    | Transcription factor         | MYB domain protein 73 (MYB73)                                 | 1.00E-88  |
| T2-L2 | blue | Csa3G881750 | 2.24  | 0.009561    | Lipid metabolism             | PR5-like receptor kinase (PR5K)                               | 4.00E-154 |
| T2-L2 | blue | Csa5G589260 | 2.243 | 0           | Amino acid metabolism        | O-acetylserine(thiol) lyase (OAS-TL)                          | 4.00E-162 |
| T2-L2 | blue | Csa3G733350 | 2.317 | 0.00004435  | Cell organization            | RHO guanyl-nucleotide exchange factor 11 (ROPGEF11)           | 9.00E-41  |
| T2-L2 | blue | Csa2G004690 | 2.522 | 0.000004593 | Transcription factor         | Heat shock transcription factor C1 (HSFC1)                    | 5.00E-67  |
| T2-L2 | blue | Csa7G387690 | 2.631 | 0.000001654 | Transport                    | Sulfate transporter 3;1 (SULTR 3;1)                           | 3.00E-307 |
| T2-L2 | blue | Csa1G008520 | 2.771 | 0.00804     | Transport                    | Plasma membrane proton ATPase 4 (HA4)                         | 0.00E+00  |
| T2-L2 | blue | Csa6G514850 | 3.048 | 0.00009803  | Miscellaneous                | Cytochrome P450 family 77 subfamily B polypeptide 1 (CYP77B1) | 1.00E-241 |
| T2-L2 | blue | Csa5G604150 | 3.14  | 0.01        | Redox                        | Thioredoxin 2 (TRX2)                                          |           |
| T2-L2 | blue | Csa5G223070 | 3.216 | 0.003151    | Transcription factor         | WRKY DNA-binding protein 54 (WRKY54)                          | 3.00E-96  |
| T2-L2 | blue | Csa2G359890 | 3.289 | 3.70E-03    | Not assigned                 | unknown                                                       |           |
| T2-L2 | blue | Csa1G596520 | 3.4   | 0.0002165   | Protein degradation          | Cystein proteinases superfamily protein                       | 2.00E-168 |
| T2-L2 | blue | Csa7G395800 | 3.415 | 0.001823    | Miscellaneous                | Glutathione S-transferase phi 8 (GSTF8)                       | 3.00E-82  |
| T2-L2 | blue | Csa3G119700 | 3.575 | 0.00005376  | Transcription factor         | WRKY DNA-binding protein 53 (WRKY53)                          | 1.00E-102 |
| T2-L2 | blue | Csa6G381850 | 3.831 | 0.001156    | Transport                    | Amino acid permease 3 (AAP3)                                  | 2.00E-234 |
| T2-L2 | blue | Csa1G033160 | 4.495 | 0.006049    | Miscellaneous                | Glutathione S-transferase tau 9 (GSTU9)                       | 3.00E-68  |
| T2-L2 | blue | Csa6G486960 | 4.496 | 0.000002502 | Transcription factor         | WRKY DNA-binding protein 51 (WRKY51)                          | 1.00E-36  |
| T2-L2 | blue | Csa2G058620 | 5.345 | 0.003945    | Abiotic stress               | DNAJ heat shock N-terminal domain-containing protein          | 2.00E-137 |

Supplementary Table 1 (Continued)

|       |      |             |       |             |                              |                                                               |           |
|-------|------|-------------|-------|-------------|------------------------------|---------------------------------------------------------------|-----------|
| T2-L2 | blue | Csa1G574970 | 1.827 | 1.18E-05    | Major CHO metabolism         | Hexokinase 2 (HXK2)                                           | 7.00E-51  |
| T2-L2 | blue | Csa4G618520 | 1.837 | 0.0001765   | Biodegradation of xenobiotic | UDP glycosyltransferase (UGT)                                 | 1.00E-132 |
| T2-L2 | blue | Csa2G003610 | 1.841 | 0.0003098   | Lipid metabolism             | Abnormal inflorescence meristem (AIM1)                        | 3.00E-294 |
| T2-L2 | blue | Csa3G730930 | 1.847 | 0.00004243  | Transport                    | Ammonium transporter 2 (AMT2)                                 | 8E-220    |
| T2-L2 | blue | Csa6G493850 | 1.86  | 1.50E-05    | Not assigned                 | unknown                                                       |           |
| T2-L2 | blue | Csa3G159420 | 1.871 | 1.61E-03    | Not assigned                 | unknown                                                       |           |
| T2-L2 | blue | Csa1G528610 | 1.874 | 0.00435     | Lipid metabolism             | Thylakoid membrane anion transporter 1 (ANTR1)                | 7.00E-236 |
| T2-L2 | blue | Csa1G181360 | 1.875 | 0.001947    | Transport                    | non-intrinsic ABC protein 9 (NAP9)                            | 3.00E-156 |
| T2-L2 | blue | Csa3G154410 | 2.05  | 1.63E-10    | Not assigned                 | unknown                                                       |           |
| T2-L2 | blue | Csa3G183950 | 2.092 | 0.0004285   | Abiotic stress               | Heat shock protein 83                                         | 0.00E+00  |
| T2-L2 | blue | Csa2G296090 | 2.143 | 2.44E-04    | Not assigned                 | unknown                                                       |           |
| T2-L2 | blue | Csa7G291720 | 2.169 | 0.006566    | Lipid metabolism             | Choline kinase                                                | 4.00E-133 |
| T2-L2 | blue | Csa2G427310 | 2.238 | 0.007581    | Transcription factor         | MYB domain protein 73 (MYB73)                                 | 1.00E-88  |
| T2-L2 | blue | Csa3G881750 | 2.24  | 0.009561    | Lipid metabolism             | PR5-like receptor kinase (PR5K)                               | 4.00E-154 |
| T2-L2 | blue | Csa5G589260 | 2.243 | 0           | Amino acid metabolism        | O-acetylserine(thiol) lyase (OAS-TL)                          | 4.00E-162 |
| T2-L2 | blue | Csa3G733350 | 2.317 | 0.00004435  | Cell organization            | RHO guanyl-nucleotide exchange factor 11 (ROPGEF11)           | 9.00E-41  |
| T2-L2 | blue | Csa2G004690 | 2.522 | 0.000004593 | Transcription factor         | Heat shock transcription factor C1 (HSFC1)                    | 5.00E-67  |
| T2-L2 | blue | Csa7G387690 | 2.631 | 0.000001654 | Transport                    | Sulfate transporter 3;1 (SULTR 3;1)                           | 3.00E-307 |
| T2-L2 | blue | Csa1G008520 | 2.771 | 0.00804     | Transport                    | Plasma membrane proton ATPase 4 (HA4)                         | 0.00E+00  |
| T2-L2 | blue | Csa6G514850 | 3.048 | 0.00009803  | Miscellaneous                | Cytochrome P450 family 77 subfamily B polypeptide 1 (CYP77B1) | 1.00E-241 |
| T2-L2 | blue | Csa5G604150 | 3.14  | 0.01        | Redox                        | Thioredoxin 2 (TRX2)                                          |           |
| T2-L2 | blue | Csa5G223070 | 3.216 | 0.003151    | Transcription factor         | WRKY DNA-binding protein 54 (WRKY54)                          | 3.00E-96  |
| T2-L2 | blue | Csa2G359890 | 3.289 | 3.70E-03    | Not assigned                 | unknown                                                       |           |
| T2-L2 | blue | Csa1G596520 | 3.4   | 0.0002165   | Protein degradation          | Cystein proteinases superfamily protein                       | 2.00E-168 |
| T2-L2 | blue | Csa7G395800 | 3.415 | 0.001823    | Miscellaneous                | Glutathione S-transferase phi 8 (GSTF8)                       | 3.00E-82  |
| T2-L2 | blue | Csa3G119700 | 3.575 | 0.00005376  | Transcription factor         | WRKY DNA-binding protein 53 (WRKY53)                          | 1.00E-102 |
| T2-L2 | blue | Csa6G381850 | 3.831 | 0.001156    | Transport                    | Amino acid permease 3 (AAP3)                                  | 2.00E-234 |
| T2-L2 | blue | Csa1G033160 | 4.495 | 0.006049    | Miscellaneous                | Glutathione S-transferase tau 9 (GSTU9)                       | 3.00E-68  |
| T2-L2 | blue | Csa6G486960 | 4.496 | 0.000002502 | Transcription factor         | WRKY DNA-binding protein 51 (WRKY51)                          | 1.00E-36  |
| T2-L2 | blue | Csa2G058620 | 5.345 | 0.003945    | Abiotic stress               | DNAJ heat shock N-terminal domain-containing protein          | 2.00E-137 |

Supplementary Table 1 (Continued)

|       |      |             |       |             |                              |                                                               |           |
|-------|------|-------------|-------|-------------|------------------------------|---------------------------------------------------------------|-----------|
| T2-L2 | blue | Csa1G574970 | 1.827 | 1.18E-05    | Major CHO metabolism         | Hexokinase 2 (HXK2)                                           | 7.00E-51  |
| T2-L2 | blue | Csa4G618520 | 1.837 | 0.0001765   | Biodegradation of xenobiotic | UDP glycosyltransferase (UGT)                                 | 1.00E-132 |
| T2-L2 | blue | Csa2G003610 | 1.841 | 0.0003098   | Lipid metabolism             | Abnormal inflorescence meristem (AIM1)                        | 3.00E-294 |
| T2-L2 | blue | Csa3G730930 | 1.847 | 0.00004243  | Transport                    | Ammonium transporter 2 (AMT2)                                 | 8E-220    |
| T2-L2 | blue | Csa6G493850 | 1.86  | 1.50E-05    | Not assigned                 | unknown                                                       |           |
| T2-L2 | blue | Csa3G159420 | 1.871 | 1.61E-03    | Not assigned                 | unknown                                                       |           |
| T2-L2 | blue | Csa1G528610 | 1.874 | 0.00435     | Lipid metabolism             | Thylakoid membrane anion transporter 1 (ANTR1)                | 7.00E-236 |
| T2-L2 | blue | Csa1G181360 | 1.875 | 0.001947    | Transport                    | non-intrinsic ABC protein 9 (NAP9)                            | 3.00E-156 |
| T2-L2 | blue | Csa3G154410 | 2.05  | 1.63E-10    | Not assigned                 | unknown                                                       |           |
| T2-L2 | blue | Csa3G183950 | 2.092 | 0.0004285   | Abiotic stress               | Heat shock protein 83                                         | 0.00E+00  |
| T2-L2 | blue | Csa2G296090 | 2.143 | 2.44E-04    | Not assigned                 | unknown                                                       |           |
| T2-L2 | blue | Csa7G291720 | 2.169 | 0.006566    | Lipid metabolism             | Choline kinase                                                | 4.00E-133 |
| T2-L2 | blue | Csa2G427310 | 2.238 | 0.007581    | Transcription factor         | MYB domain protein 73 (MYB73)                                 | 1.00E-88  |
| T2-L2 | blue | Csa3G881750 | 2.24  | 0.009561    | Lipid metabolism             | PR5-like receptor kinase (PR5K)                               | 4.00E-154 |
| T2-L2 | blue | Csa5G589260 | 2.243 | 0           | Amino acid metabolism        | O-acetylserine(thiol) lyase (OAS-TL)                          | 4.00E-162 |
| T2-L2 | blue | Csa3G733350 | 2.317 | 0.00004435  | Cell organization            | RHO guanyl-nucleotide exchange factor 11 (ROPGEF11)           | 9.00E-41  |
| T2-L2 | blue | Csa2G004690 | 2.522 | 0.000004593 | Transcription factor         | Heat shock transcription factor C1 (HSFC1)                    | 5.00E-67  |
| T2-L2 | blue | Csa7G387690 | 2.631 | 0.000001654 | Transport                    | Sulfate transporter 3;1 (SULTR 3;1)                           | 3.00E-307 |
| T2-L2 | blue | Csa1G008520 | 2.771 | 0.00804     | Transport                    | Plasma membrane proton ATPase 4 (HA4)                         | 0.00E+00  |
| T2-L2 | blue | Csa6G514850 | 3.048 | 0.00009803  | Miscellaneous                | Cytochrome P450 family 77 subfamily B polypeptide 1 (CYP77B1) | 1.00E-241 |
| T2-L2 | blue | Csa5G604150 | 3.14  | 0.01        | Redox                        | Thioredoxin 2 (TRX2)                                          |           |
| T2-L2 | blue | Csa5G223070 | 3.216 | 0.003151    | Transcription factor         | WRKY DNA-binding protein 54 (WRKY54)                          | 3.00E-96  |
| T2-L2 | blue | Csa2G359890 | 3.289 | 3.70E-03    | Not assigned                 | unknown                                                       |           |
| T2-L2 | blue | Csa1G596520 | 3.4   | 0.0002165   | Protein degradation          | Cystein proteinases superfamily protein                       | 2.00E-168 |
| T2-L2 | blue | Csa7G395800 | 3.415 | 0.001823    | Miscellaneous                | Glutathione S-transferase phi 8 (GSTF8)                       | 3.00E-82  |
| T2-L2 | blue | Csa3G119700 | 3.575 | 0.00005376  | Transcription factor         | WRKY DNA-binding protein 53 (WRKY53)                          | 1.00E-102 |
| T2-L2 | blue | Csa6G381850 | 3.831 | 0.001156    | Transport                    | Amino acid permease 3 (AAP3)                                  | 2.00E-234 |
| T2-L2 | blue | Csa1G033160 | 4.495 | 0.006049    | Miscellaneous                | Glutathione S-transferase tau 9 (GSTU9)                       | 3.00E-68  |
| T2-L2 | blue | Csa6G486960 | 4.496 | 0.000002502 | Transcription factor         | WRKY DNA-binding protein 51 (WRKY51)                          | 1.00E-36  |
| T2-L2 | blue | Csa2G058620 | 5.345 | 0.003945    | Abiotic stress               | DNAJ heat shock N-terminal domain-containing protein          | 2.00E-137 |

Supplementary Table 1 (Continued)

|       |      |             |       |             |                              |                                                               |           |
|-------|------|-------------|-------|-------------|------------------------------|---------------------------------------------------------------|-----------|
| T2-L2 | blue | Csa1G574970 | 1.827 | 1.18E-05    | Major CHO metabolism         | Hexokinase 2 (HXK2)                                           | 7.00E-51  |
| T2-L2 | blue | Csa4G618520 | 1.837 | 0.0001765   | Biodegradation of xenobiotic | UDP glycosyltransferase (UGT)                                 | 1.00E-132 |
| T2-L2 | blue | Csa2G003610 | 1.841 | 0.0003098   | Lipid metabolism             | Abnormal inflorescence meristem (AIM1)                        | 3.00E-294 |
| T2-L2 | blue | Csa3G730930 | 1.847 | 0.00004243  | Transport                    | Ammonium transporter 2 (AMT2)                                 | 8E-220    |
| T2-L2 | blue | Csa6G493850 | 1.86  | 1.50E-05    | Not assigned                 | unknown                                                       |           |
| T2-L2 | blue | Csa3G159420 | 1.871 | 1.61E-03    | Not assigned                 | unknown                                                       |           |
| T2-L2 | blue | Csa1G528610 | 1.874 | 0.00435     | Lipid metabolism             | Thylakoid membrane anion transporter 1 (ANTR1)                | 7.00E-236 |
| T2-L2 | blue | Csa1G181360 | 1.875 | 0.001947    | Transport                    | non-intrinsic ABC protein 9 (NAP9)                            | 3.00E-156 |
| T2-L2 | blue | Csa3G154410 | 2.05  | 1.63E-10    | Not assigned                 | unknown                                                       |           |
| T2-L2 | blue | Csa3G183950 | 2.092 | 0.0004285   | Abiotic stress               | Heat shock protein 83                                         | 0.00E+00  |
| T2-L2 | blue | Csa2G296090 | 2.143 | 2.44E-04    | Not assigned                 | unknown                                                       |           |
| T2-L2 | blue | Csa7G291720 | 2.169 | 0.006566    | Lipid metabolism             | Choline kinase                                                | 4.00E-133 |
| T2-L2 | blue | Csa2G427310 | 2.238 | 0.007581    | Transcription factor         | MYB domain protein 73 (MYB73)                                 | 1.00E-88  |
| T2-L2 | blue | Csa3G881750 | 2.24  | 0.009561    | Lipid metabolism             | PR5-like receptor kinase (PR5K)                               | 4.00E-154 |
| T2-L2 | blue | Csa5G589260 | 2.243 | 0           | Amino acid metabolism        | O-acetylserine(thiol) lyase (OAS-TL)                          | 4.00E-162 |
| T2-L2 | blue | Csa3G733350 | 2.317 | 0.00004435  | Cell organization            | RHO guanyl-nucleotide exchange factor 11 (ROPGEF11)           | 9.00E-41  |
| T2-L2 | blue | Csa2G004690 | 2.522 | 0.000004593 | Transcription factor         | Heat shock transcription factor C1 (HSFC1)                    | 5.00E-67  |
| T2-L2 | blue | Csa7G387690 | 2.631 | 0.000001654 | Transport                    | Sulfate transporter 3;1 (SULTR 3;1)                           | 3.00E-307 |
| T2-L2 | blue | Csa1G008520 | 2.771 | 0.00804     | Transport                    | Plasma membrane proton ATPase 4 (HA4)                         | 0.00E+00  |
| T2-L2 | blue | Csa6G514850 | 3.048 | 0.00009803  | Miscellaneous                | Cytochrome P450 family 77 subfamily B polypeptide 1 (CYP77B1) | 1.00E-241 |
| T2-L2 | blue | Csa5G604150 | 3.14  | 0.01        | Redox                        | Thioredoxin 2 (TRX2)                                          |           |
| T2-L2 | blue | Csa5G223070 | 3.216 | 0.003151    | Transcription factor         | WRKY DNA-binding protein 54 (WRKY54)                          | 3.00E-96  |
| T2-L2 | blue | Csa2G359890 | 3.289 | 3.70E-03    | Not assigned                 | unknown                                                       |           |
| T2-L2 | blue | Csa1G596520 | 3.4   | 0.0002165   | Protein degradation          | Cystein proteinases superfamily protein                       | 2.00E-168 |
| T2-L2 | blue | Csa7G395800 | 3.415 | 0.001823    | Miscellaneous                | Glutathione S-transferase phi 8 (GSTF8)                       | 3.00E-82  |
| T2-L2 | blue | Csa3G119700 | 3.575 | 0.00005376  | Transcription factor         | WRKY DNA-binding protein 53 (WRKY53)                          | 1.00E-102 |
| T2-L2 | blue | Csa6G381850 | 3.831 | 0.001156    | Transport                    | Amino acid permease 3 (AAP3)                                  | 2.00E-234 |
| T2-L2 | blue | Csa1G033160 | 4.495 | 0.006049    | Miscellaneous                | Glutathione S-transferase tau 9 (GSTU9)                       | 3.00E-68  |
| T2-L2 | blue | Csa6G486960 | 4.496 | 0.000002502 | Transcription factor         | WRKY DNA-binding protein 51 (WRKY51)                          | 1.00E-36  |
| T2-L2 | blue | Csa2G058620 | 5.345 | 0.003945    | Abiotic stress               | DNAJ heat shock N-terminal domain-containing protein          | 2.00E-137 |

Supplementary Table 1 (Continued)

|       |      |             |       |             |                              |                                                               |           |
|-------|------|-------------|-------|-------------|------------------------------|---------------------------------------------------------------|-----------|
| T2-L2 | blue | Csa1G574970 | 1.827 | 1.18E-05    | Major CHO metabolism         | Hexokinase 2 (HXK2)                                           | 7.00E-51  |
| T2-L2 | blue | Csa4G618520 | 1.837 | 0.0001765   | Biodegradation of xenobiotic | UDP glycosyltransferase (UGT)                                 | 1.00E-132 |
| T2-L2 | blue | Csa2G003610 | 1.841 | 0.0003098   | Lipid metabolism             | Abnormal inflorescence meristem (AIM1)                        | 3.00E-294 |
| T2-L2 | blue | Csa3G730930 | 1.847 | 0.00004243  | Transport                    | Ammonium transporter 2 (AMT2)                                 | 8E-220    |
| T2-L2 | blue | Csa6G493850 | 1.86  | 1.50E-05    | Not assigned                 | unknown                                                       |           |
| T2-L2 | blue | Csa3G159420 | 1.871 | 1.61E-03    | Not assigned                 | unknown                                                       |           |
| T2-L2 | blue | Csa1G528610 | 1.874 | 0.00435     | Lipid metabolism             | Thylakoid membrane anion transporter 1 (ANTR1)                | 7.00E-236 |
| T2-L2 | blue | Csa1G181360 | 1.875 | 0.001947    | Transport                    | non-intrinsic ABC protein 9 (NAP9)                            | 3.00E-156 |
| T2-L2 | blue | Csa3G154410 | 2.05  | 1.63E-10    | Not assigned                 | unknown                                                       |           |
| T2-L2 | blue | Csa3G183950 | 2.092 | 0.0004285   | Abiotic stress               | Heat shock protein 83                                         | 0.00E+00  |
| T2-L2 | blue | Csa2G296090 | 2.143 | 2.44E-04    | Not assigned                 | unknown                                                       |           |
| T2-L2 | blue | Csa7G291720 | 2.169 | 0.006566    | Lipid metabolism             | Choline kinase                                                | 4.00E-133 |
| T2-L2 | blue | Csa2G427310 | 2.238 | 0.007581    | Transcription factor         | MYB domain protein 73 (MYB73)                                 | 1.00E-88  |
| T2-L2 | blue | Csa3G881750 | 2.24  | 0.009561    | Lipid metabolism             | PR5-like receptor kinase (PR5K)                               | 4.00E-154 |
| T2-L2 | blue | Csa5G589260 | 2.243 | 0           | Amino acid metabolism        | O-acetylserine(thiol) lyase (OAS-TL)                          | 4.00E-162 |
| T2-L2 | blue | Csa3G733350 | 2.317 | 0.00004435  | Cell organization            | RHO guanyl-nucleotide exchange factor 11 (ROPGEF11)           | 9.00E-41  |
| T2-L2 | blue | Csa2G004690 | 2.522 | 0.000004593 | Transcription factor         | Heat shock transcription factor C1 (HSFC1)                    | 5.00E-67  |
| T2-L2 | blue | Csa7G387690 | 2.631 | 0.000001654 | Transport                    | Sulfate transporter 3;1 (SULTR 3;1)                           | 3.00E-307 |
| T2-L2 | blue | Csa1G008520 | 2.771 | 0.00804     | Transport                    | Plasma membrane proton ATPase 4 (HA4)                         | 0.00E+00  |
| T2-L2 | blue | Csa6G514850 | 3.048 | 0.00009803  | Miscellaneous                | Cytochrome P450 family 77 subfamily B polypeptide 1 (CYP77B1) | 1.00E-241 |
| T2-L2 | blue | Csa5G604150 | 3.14  | 0.01        | Redox                        | Thioredoxin 2 (TRX2)                                          |           |
| T2-L2 | blue | Csa5G223070 | 3.216 | 0.003151    | Transcription factor         | WRKY DNA-binding protein 54 (WRKY54)                          | 3.00E-96  |
| T2-L2 | blue | Csa2G359890 | 3.289 | 3.70E-03    | Not assigned                 | unknown                                                       |           |
| T2-L2 | blue | Csa1G596520 | 3.4   | 0.0002165   | Protein degradation          | Cystein proteinases superfamily protein                       | 2.00E-168 |
| T2-L2 | blue | Csa7G395800 | 3.415 | 0.001823    | Miscellaneous                | Glutathione S-transferase phi 8 (GSTF8)                       | 3.00E-82  |
| T2-L2 | blue | Csa3G119700 | 3.575 | 0.00005376  | Transcription factor         | WRKY DNA-binding protein 53 (WRKY53)                          | 1.00E-102 |
| T2-L2 | blue | Csa6G381850 | 3.831 | 0.001156    | Transport                    | Amino acid permease 3 (AAP3)                                  | 2.00E-234 |
| T2-L2 | blue | Csa1G033160 | 4.495 | 0.006049    | Miscellaneous                | Glutathione S-transferase tau 9 (GSTU9)                       | 3.00E-68  |
| T2-L2 | blue | Csa6G486960 | 4.496 | 0.000002502 | Transcription factor         | WRKY DNA-binding protein 51 (WRKY51)                          | 1.00E-36  |
| T2-L2 | blue | Csa2G058620 | 5.345 | 0.003945    | Abiotic stress               | DNAJ heat shock N-terminal domain-containing protein          | 2.00E-137 |

Supplementary Table 1 (Continued)

|       |      |             |       |             |                              |                                                               |           |
|-------|------|-------------|-------|-------------|------------------------------|---------------------------------------------------------------|-----------|
| T2-L2 | blue | Csa1G574970 | 1.827 | 1.18E-05    | Major CHO metabolism         | Hexokinase 2 (HXK2)                                           | 7.00E-51  |
| T2-L2 | blue | Csa4G618520 | 1.837 | 0.0001765   | Biodegradation of xenobiotic | UDP glycosyltransferase (UGT)                                 | 1.00E-132 |
| T2-L2 | blue | Csa2G003610 | 1.841 | 0.0003098   | Lipid metabolism             | Abnormal inflorescence meristem (AIM1)                        | 3.00E-294 |
| T2-L2 | blue | Csa3G730930 | 1.847 | 0.00004243  | Transport                    | Ammonium transporter 2 (AMT2)                                 | 8E-220    |
| T2-L2 | blue | Csa6G493850 | 1.86  | 1.50E-05    | Not assigned                 | unknown                                                       |           |
| T2-L2 | blue | Csa3G159420 | 1.871 | 1.61E-03    | Not assigned                 | unknown                                                       |           |
| T2-L2 | blue | Csa1G528610 | 1.874 | 0.00435     | Lipid metabolism             | Thylakoid membrane anion transporter 1 (ANTR1)                | 7.00E-236 |
| T2-L2 | blue | Csa1G181360 | 1.875 | 0.001947    | Transport                    | non-intrinsic ABC protein 9 (NAP9)                            | 3.00E-156 |
| T2-L2 | blue | Csa3G154410 | 2.05  | 1.63E-10    | Not assigned                 | unknown                                                       |           |
| T2-L2 | blue | Csa3G183950 | 2.092 | 0.0004285   | Abiotic stress               | Heat shock protein 83                                         | 0.00E+00  |
| T2-L2 | blue | Csa2G296090 | 2.143 | 2.44E-04    | Not assigned                 | unknown                                                       |           |
| T2-L2 | blue | Csa7G291720 | 2.169 | 0.006566    | Lipid metabolism             | Choline kinase                                                | 4.00E-133 |
| T2-L2 | blue | Csa2G427310 | 2.238 | 0.007581    | Transcription factor         | MYB domain protein 73 (MYB73)                                 | 1.00E-88  |
| T2-L2 | blue | Csa3G881750 | 2.24  | 0.009561    | Lipid metabolism             | PR5-like receptor kinase (PR5K)                               | 4.00E-154 |
| T2-L2 | blue | Csa5G589260 | 2.243 | 0           | Amino acid metabolism        | O-acetylserine(thiol) lyase (OAS-TL)                          | 4.00E-162 |
| T2-L2 | blue | Csa3G733350 | 2.317 | 0.00004435  | Cell organization            | RHO guanyl-nucleotide exchange factor 11 (ROPGEF11)           | 9.00E-41  |
| T2-L2 | blue | Csa2G004690 | 2.522 | 0.000004593 | Transcription factor         | Heat shock transcription factor C1 (HSFC1)                    | 5.00E-67  |
| T2-L2 | blue | Csa7G387690 | 2.631 | 0.000001654 | Transport                    | Sulfate transporter 3;1 (SULTR 3;1)                           | 3.00E-307 |
| T2-L2 | blue | Csa1G008520 | 2.771 | 0.00804     | Transport                    | Plasma membrane proton ATPase 4 (HA4)                         | 0.00E+00  |
| T2-L2 | blue | Csa6G514850 | 3.048 | 0.00009803  | Miscellaneous                | Cytochrome P450 family 77 subfamily B polypeptide 1 (CYP77B1) | 1.00E-241 |
| T2-L2 | blue | Csa5G604150 | 3.14  | 0.01        | Redox                        | Thioredoxin 2 (TRX2)                                          |           |
| T2-L2 | blue | Csa5G223070 | 3.216 | 0.003151    | Transcription factor         | WRKY DNA-binding protein 54 (WRKY54)                          | 3.00E-96  |
| T2-L2 | blue | Csa2G359890 | 3.289 | 3.70E-03    | Not assigned                 | unknown                                                       |           |
| T2-L2 | blue | Csa1G596520 | 3.4   | 0.0002165   | Protein degradation          | Cystein proteinases superfamily protein                       | 2.00E-168 |
| T2-L2 | blue | Csa7G395800 | 3.415 | 0.001823    | Miscellaneous                | Glutathione S-transferase phi 8 (GSTF8)                       | 3.00E-82  |
| T2-L2 | blue | Csa3G119700 | 3.575 | 0.00005376  | Transcription factor         | WRKY DNA-binding protein 53 (WRKY53)                          | 1.00E-102 |
| T2-L2 | blue | Csa6G381850 | 3.831 | 0.001156    | Transport                    | Amino acid permease 3 (AAP3)                                  | 2.00E-234 |
| T2-L2 | blue | Csa1G033160 | 4.495 | 0.006049    | Miscellaneous                | Glutathione S-transferase tau 9 (GSTU9)                       | 3.00E-68  |
| T2-L2 | blue | Csa6G486960 | 4.496 | 0.000002502 | Transcription factor         | WRKY DNA-binding protein 51 (WRKY51)                          | 1.00E-36  |
| T2-L2 | blue | Csa2G058620 | 5.345 | 0.003945    | Abiotic stress               | DNAJ heat shock N-terminal domain-containing protein          | 2.00E-137 |



Supplementary Table 1 (Continued)

|       |      |             |       |             |                              |                                                               |           |
|-------|------|-------------|-------|-------------|------------------------------|---------------------------------------------------------------|-----------|
| T2-L2 | blue | Csa1G574970 | 1.827 | 1.18E-05    | Major CHO metabolism         | Hexokinase 2 (HXK2)                                           | 7.00E-51  |
| T2-L2 | blue | Csa4G618520 | 1.837 | 0.0001765   | Biodegradation of xenobiotic | UDP glycosyltransferase (UGT)                                 | 1.00E-132 |
| T2-L2 | blue | Csa2G003610 | 1.841 | 0.0003098   | Lipid metabolism             | Abnormal inflorescence meristem (AIM1)                        | 3.00E-294 |
| T2-L2 | blue | Csa3G730930 | 1.847 | 0.00004243  | Transport                    | Ammonium transporter 2 (AMT2)                                 | 8E-220    |
| T2-L2 | blue | Csa6G493850 | 1.86  | 1.50E-05    | Not assigned                 | unknown                                                       |           |
| T2-L2 | blue | Csa3G159420 | 1.871 | 1.61E-03    | Not assigned                 | unknown                                                       |           |
| T2-L2 | blue | Csa1G528610 | 1.874 | 0.00435     | Lipid metabolism             | Thylakoid membrane anion transporter 1 (ANTR1)                | 7.00E-236 |
| T2-L2 | blue | Csa1G181360 | 1.875 | 0.001947    | Transport                    | non-intrinsic ABC protein 9 (NAP9)                            | 3.00E-156 |
| T2-L2 | blue | Csa3G154410 | 2.05  | 1.63E-10    | Not assigned                 | unknown                                                       |           |
| T2-L2 | blue | Csa3G183950 | 2.092 | 0.0004285   | Abiotic stress               | Heat shock protein 83                                         | 0.00E+00  |
| T2-L2 | blue | Csa2G296090 | 2.143 | 2.44E-04    | Not assigned                 | unknown                                                       |           |
| T2-L2 | blue | Csa7G291720 | 2.169 | 0.006566    | Lipid metabolism             | Choline kinase                                                | 4.00E-133 |
| T2-L2 | blue | Csa2G427310 | 2.238 | 0.007581    | Transcription factor         | MYB domain protein 73 (MYB73)                                 | 1.00E-88  |
| T2-L2 | blue | Csa3G881750 | 2.24  | 0.009561    | Lipid metabolism             | PR5-like receptor kinase (PR5K)                               | 4.00E-154 |
| T2-L2 | blue | Csa5G589260 | 2.243 | 0           | Amino acid metabolism        | O-acetylserine(thiol) lyase (OAS-TL)                          | 4.00E-162 |
| T2-L2 | blue | Csa3G733350 | 2.317 | 0.00004435  | Cell organization            | RHO guanyl-nucleotide exchange factor 11 (ROPGEF11)           | 9.00E-41  |
| T2-L2 | blue | Csa2G004690 | 2.522 | 0.000004593 | Transcription factor         | Heat shock transcription factor C1 (HSFC1)                    | 5.00E-67  |
| T2-L2 | blue | Csa7G387690 | 2.631 | 0.000001654 | Transport                    | Sulfate transporter 3;1 (SULTR 3;1)                           | 3.00E-307 |
| T2-L2 | blue | Csa1G008520 | 2.771 | 0.00804     | Transport                    | Plasma membrane proton ATPase 4 (HA4)                         | 0.00E+00  |
| T2-L2 | blue | Csa6G514850 | 3.048 | 0.00009803  | Miscellaneous                | Cytochrome P450 family 77 subfamily B polypeptide 1 (CYP77B1) | 1.00E-241 |
| T2-L2 | blue | Csa5G604150 | 3.14  | 0.01        | Redox                        | Thioredoxin 2 (TRX2)                                          |           |
| T2-L2 | blue | Csa5G223070 | 3.216 | 0.003151    | Transcription factor         | WRKY DNA-binding protein 54 (WRKY54)                          | 3.00E-96  |
| T2-L2 | blue | Csa2G359890 | 3.289 | 3.70E-03    | Not assigned                 | unknown                                                       |           |
| T2-L2 | blue | Csa1G596520 | 3.4   | 0.0002165   | Protein degradation          | Cystein proteinases superfamily protein                       | 2.00E-168 |
| T2-L2 | blue | Csa7G395800 | 3.415 | 0.001823    | Miscellaneous                | Glutathione S-transferase phi 8 (GSTF8)                       | 3.00E-82  |
| T2-L2 | blue | Csa3G119700 | 3.575 | 0.00005376  | Transcription factor         | WRKY DNA-binding protein 53 (WRKY53)                          | 1.00E-102 |
| T2-L2 | blue | Csa6G381850 | 3.831 | 0.001156    | Transport                    | Amino acid permease 3 (AAP3)                                  | 2.00E-234 |
| T2-L2 | blue | Csa1G033160 | 4.495 | 0.006049    | Miscellaneous                | Glutathione S-transferase tau 9 (GSTU9)                       | 3.00E-68  |
| T2-L2 | blue | Csa6G486960 | 4.496 | 0.000002502 | Transcription factor         | WRKY DNA-binding protein 51 (WRKY51)                          | 1.00E-36  |
| T2-L2 | blue | Csa2G058620 | 5.345 | 0.003945    | Abiotic stress               | DNAJ heat shock N-terminal domain-containing protein          | 2.00E-137 |

Supplementary Table 1 (Continued)

|       |      |             |       |             |                              |                                                               |           |
|-------|------|-------------|-------|-------------|------------------------------|---------------------------------------------------------------|-----------|
| T2-L2 | blue | Csa1G574970 | 1.827 | 1.18E-05    | Major CHO metabolism         | Hexokinase 2 (HXK2)                                           | 7.00E-51  |
| T2-L2 | blue | Csa4G618520 | 1.837 | 0.0001765   | Biodegradation of xenobiotic | UDP glycosyltransferase (UGT)                                 | 1.00E-132 |
| T2-L2 | blue | Csa2G003610 | 1.841 | 0.0003098   | Lipid metabolism             | Abnormal inflorescence meristem (AIM1)                        | 3.00E-294 |
| T2-L2 | blue | Csa3G730930 | 1.847 | 0.00004243  | Transport                    | Ammonium transporter 2 (AMT2)                                 | 8E-220    |
| T2-L2 | blue | Csa6G493850 | 1.86  | 1.50E-05    | Not assigned                 | unknown                                                       |           |
| T2-L2 | blue | Csa3G159420 | 1.871 | 1.61E-03    | Not assigned                 | unknown                                                       |           |
| T2-L2 | blue | Csa1G528610 | 1.874 | 0.00435     | Lipid metabolism             | Thylakoid membrane anion transporter 1 (ANTR1)                | 7.00E-236 |
| T2-L2 | blue | Csa1G181360 | 1.875 | 0.001947    | Transport                    | non-intrinsic ABC protein 9 (NAP9)                            | 3.00E-156 |
| T2-L2 | blue | Csa3G154410 | 2.05  | 1.63E-10    | Not assigned                 | unknown                                                       |           |
| T2-L2 | blue | Csa3G183950 | 2.092 | 0.0004285   | Abiotic stress               | Heat shock protein 83                                         | 0.00E+00  |
| T2-L2 | blue | Csa2G296090 | 2.143 | 2.44E-04    | Not assigned                 | unknown                                                       |           |
| T2-L2 | blue | Csa7G291720 | 2.169 | 0.006566    | Lipid metabolism             | Choline kinase                                                | 4.00E-133 |
| T2-L2 | blue | Csa2G427310 | 2.238 | 0.007581    | Transcription factor         | MYB domain protein 73 (MYB73)                                 | 1.00E-88  |
| T2-L2 | blue | Csa3G881750 | 2.24  | 0.009561    | Lipid metabolism             | PR5-like receptor kinase (PR5K)                               | 4.00E-154 |
| T2-L2 | blue | Csa5G589260 | 2.243 | 0           | Amino acid metabolism        | O-acetylserine(thiol) lyase (OAS-TL)                          | 4.00E-162 |
| T2-L2 | blue | Csa3G733350 | 2.317 | 0.00004435  | Cell organization            | RHO guanyl-nucleotide exchange factor 11 (ROPGEF11)           | 9.00E-41  |
| T2-L2 | blue | Csa2G004690 | 2.522 | 0.000004593 | Transcription factor         | Heat shock transcription factor C1 (HSFC1)                    | 5.00E-67  |
| T2-L2 | blue | Csa7G387690 | 2.631 | 0.000001654 | Transport                    | Sulfate transporter 3;1 (SULTR 3;1)                           | 3.00E-307 |
| T2-L2 | blue | Csa1G008520 | 2.771 | 0.00804     | Transport                    | Plasma membrane proton ATPase 4 (HA4)                         | 0.00E+00  |
| T2-L2 | blue | Csa6G514850 | 3.048 | 0.00009803  | Miscellaneous                | Cytochrome P450 family 77 subfamily B polypeptide 1 (CYP77B1) | 1.00E-241 |
| T2-L2 | blue | Csa5G604150 | 3.14  | 0.01        | Redox                        | Thioredoxin 2 (TRX2)                                          |           |
| T2-L2 | blue | Csa5G223070 | 3.216 | 0.003151    | Transcription factor         | WRKY DNA-binding protein 54 (WRKY54)                          | 3.00E-96  |
| T2-L2 | blue | Csa2G359890 | 3.289 | 3.70E-03    | Not assigned                 | unknown                                                       |           |
| T2-L2 | blue | Csa1G596520 | 3.4   | 0.0002165   | Protein degradation          | Cystein proteinases superfamily protein                       | 2.00E-168 |
| T2-L2 | blue | Csa7G395800 | 3.415 | 0.001823    | Miscellaneous                | Glutathione S-transferase phi 8 (GSTF8)                       | 3.00E-82  |
| T2-L2 | blue | Csa3G119700 | 3.575 | 0.00005376  | Transcription factor         | WRKY DNA-binding protein 53 (WRKY53)                          | 1.00E-102 |
| T2-L2 | blue | Csa6G381850 | 3.831 | 0.001156    | Transport                    | Amino acid permease 3 (AAP3)                                  | 2.00E-234 |
| T2-L2 | blue | Csa1G033160 | 4.495 | 0.006049    | Miscellaneous                | Glutathione S-transferase tau 9 (GSTU9)                       | 3.00E-68  |
| T2-L2 | blue | Csa6G486960 | 4.496 | 0.000002502 | Transcription factor         | WRKY DNA-binding protein 51 (WRKY51)                          | 1.00E-36  |
| T2-L2 | blue | Csa2G058620 | 5.345 | 0.003945    | Abiotic stress               | DNAJ heat shock N-terminal domain-containing protein          | 2.00E-137 |

Supplementary Table 1 (Continued)

|       |      |             |       |             |                              |                                                               |           |
|-------|------|-------------|-------|-------------|------------------------------|---------------------------------------------------------------|-----------|
| T2-L2 | blue | Csa1G574970 | 1.827 | 1.18E-05    | Major CHO metabolism         | Hexokinase 2 (HXK2)                                           | 7.00E-51  |
| T2-L2 | blue | Csa4G618520 | 1.837 | 0.0001765   | Biodegradation of xenobiotic | UDP glycosyltransferase (UGT)                                 | 1.00E-132 |
| T2-L2 | blue | Csa2G003610 | 1.841 | 0.0003098   | Lipid metabolism             | Abnormal inflorescence meristem (AIM1)                        | 3.00E-294 |
| T2-L2 | blue | Csa3G730930 | 1.847 | 0.00004243  | Transport                    | Ammonium transporter 2 (AMT2)                                 | 8E-220    |
| T2-L2 | blue | Csa6G493850 | 1.86  | 1.50E-05    | Not assigned                 | unknown                                                       |           |
| T2-L2 | blue | Csa3G159420 | 1.871 | 1.61E-03    | Not assigned                 | unknown                                                       |           |
| T2-L2 | blue | Csa1G528610 | 1.874 | 0.00435     | Lipid metabolism             | Thylakoid membrane anion transporter 1 (ANTR1)                | 7.00E-236 |
| T2-L2 | blue | Csa1G181360 | 1.875 | 0.001947    | Transport                    | non-intrinsic ABC protein 9 (NAP9)                            | 3.00E-156 |
| T2-L2 | blue | Csa3G154410 | 2.05  | 1.63E-10    | Not assigned                 | unknown                                                       |           |
| T2-L2 | blue | Csa3G183950 | 2.092 | 0.0004285   | Abiotic stress               | Heat shock protein 83                                         | 0.00E+00  |
| T2-L2 | blue | Csa2G296090 | 2.143 | 2.44E-04    | Not assigned                 | unknown                                                       |           |
| T2-L2 | blue | Csa7G291720 | 2.169 | 0.006566    | Lipid metabolism             | Choline kinase                                                | 4.00E-133 |
| T2-L2 | blue | Csa2G427310 | 2.238 | 0.007581    | Transcription factor         | MYB domain protein 73 (MYB73)                                 | 1.00E-88  |
| T2-L2 | blue | Csa3G881750 | 2.24  | 0.009561    | Lipid metabolism             | PR5-like receptor kinase (PR5K)                               | 4.00E-154 |
| T2-L2 | blue | Csa5G589260 | 2.243 | 0           | Amino acid metabolism        | O-acetylserine(thiol) lyase (OAS-TL)                          | 4.00E-162 |
| T2-L2 | blue | Csa3G733350 | 2.317 | 0.00004435  | Cell organization            | RHO guanyl-nucleotide exchange factor 11 (ROPGEF11)           | 9.00E-41  |
| T2-L2 | blue | Csa2G004690 | 2.522 | 0.000004593 | Transcription factor         | Heat shock transcription factor C1 (HSFC1)                    | 5.00E-67  |
| T2-L2 | blue | Csa7G387690 | 2.631 | 0.000001654 | Transport                    | Sulfate transporter 3;1 (SULTR 3;1)                           | 3.00E-307 |
| T2-L2 | blue | Csa1G008520 | 2.771 | 0.00804     | Transport                    | Plasma membrane proton ATPase 4 (HA4)                         | 0.00E+00  |
| T2-L2 | blue | Csa6G514850 | 3.048 | 0.00009803  | Miscellaneous                | Cytochrome P450 family 77 subfamily B polypeptide 1 (CYP77B1) | 1.00E-241 |
| T2-L2 | blue | Csa5G604150 | 3.14  | 0.01        | Redox                        | Thioredoxin 2 (TRX2)                                          |           |
| T2-L2 | blue | Csa5G223070 | 3.216 | 0.003151    | Transcription factor         | WRKY DNA-binding protein 54 (WRKY54)                          | 3.00E-96  |
| T2-L2 | blue | Csa2G359890 | 3.289 | 3.70E-03    | Not assigned                 | unknown                                                       |           |
| T2-L2 | blue | Csa1G596520 | 3.4   | 0.0002165   | Protein degradation          | Cystein proteinases superfamily protein                       | 2.00E-168 |
| T2-L2 | blue | Csa7G395800 | 3.415 | 0.001823    | Miscellaneous                | Glutathione S-transferase phi 8 (GSTF8)                       | 3.00E-82  |
| T2-L2 | blue | Csa3G119700 | 3.575 | 0.00005376  | Transcription factor         | WRKY DNA-binding protein 53 (WRKY53)                          | 1.00E-102 |
| T2-L2 | blue | Csa6G381850 | 3.831 | 0.001156    | Transport                    | Amino acid permease 3 (AAP3)                                  | 2.00E-234 |
| T2-L2 | blue | Csa1G033160 | 4.495 | 0.006049    | Miscellaneous                | Glutathione S-transferase tau 9 (GSTU9)                       | 3.00E-68  |
| T2-L2 | blue | Csa6G486960 | 4.496 | 0.000002502 | Transcription factor         | WRKY DNA-binding protein 51 (WRKY51)                          | 1.00E-36  |
| T2-L2 | blue | Csa2G058620 | 5.345 | 0.003945    | Abiotic stress               | DNAJ heat shock N-terminal domain-containing protein          | 2.00E-137 |

Supplementary Table 1 (Continued)

|       |      |             |       |             |                              |                                                               |           |
|-------|------|-------------|-------|-------------|------------------------------|---------------------------------------------------------------|-----------|
| T2-L2 | blue | Csa1G574970 | 1.827 | 1.18E-05    | Major CHO metabolism         | Hexokinase 2 (HXK2)                                           | 7.00E-51  |
| T2-L2 | blue | Csa4G618520 | 1.837 | 0.0001765   | Biodegradation of xenobiotic | UDP glycosyltransferase (UGT)                                 | 1.00E-132 |
| T2-L2 | blue | Csa2G003610 | 1.841 | 0.0003098   | Lipid metabolism             | Abnormal inflorescence meristem (AIM1)                        | 3.00E-294 |
| T2-L2 | blue | Csa3G730930 | 1.847 | 0.00004243  | Transport                    | Ammonium transporter 2 (AMT2)                                 | 8E-220    |
| T2-L2 | blue | Csa6G493850 | 1.86  | 1.50E-05    | Not assigned                 | unknown                                                       |           |
| T2-L2 | blue | Csa3G159420 | 1.871 | 1.61E-03    | Not assigned                 | unknown                                                       |           |
| T2-L2 | blue | Csa1G528610 | 1.874 | 0.00435     | Lipid metabolism             | Thylakoid membrane anion transporter 1 (ANTR1)                | 7.00E-236 |
| T2-L2 | blue | Csa1G181360 | 1.875 | 0.001947    | Transport                    | non-intrinsic ABC protein 9 (NAP9)                            | 3.00E-156 |
| T2-L2 | blue | Csa3G154410 | 2.05  | 1.63E-10    | Not assigned                 | unknown                                                       |           |
| T2-L2 | blue | Csa3G183950 | 2.092 | 0.0004285   | Abiotic stress               | Heat shock protein 83                                         | 0.00E+00  |
| T2-L2 | blue | Csa2G296090 | 2.143 | 2.44E-04    | Not assigned                 | unknown                                                       |           |
| T2-L2 | blue | Csa7G291720 | 2.169 | 0.006566    | Lipid metabolism             | Choline kinase                                                | 4.00E-133 |
| T2-L2 | blue | Csa2G427310 | 2.238 | 0.007581    | Transcription factor         | MYB domain protein 73 (MYB73)                                 | 1.00E-88  |
| T2-L2 | blue | Csa3G881750 | 2.24  | 0.009561    | Lipid metabolism             | PR5-like receptor kinase (PR5K)                               | 4.00E-154 |
| T2-L2 | blue | Csa5G589260 | 2.243 | 0           | Amino acid metabolism        | O-acetylserine(thiol) lyase (OAS-TL)                          | 4.00E-162 |
| T2-L2 | blue | Csa3G733350 | 2.317 | 0.00004435  | Cell organization            | RHO guanyl-nucleotide exchange factor 11 (ROPGEF11)           | 9.00E-41  |
| T2-L2 | blue | Csa2G004690 | 2.522 | 0.000004593 | Transcription factor         | Heat shock transcription factor C1 (HSFC1)                    | 5.00E-67  |
| T2-L2 | blue | Csa7G387690 | 2.631 | 0.000001654 | Transport                    | Sulfate transporter 3;1 (SULTR 3;1)                           | 3.00E-307 |
| T2-L2 | blue | Csa1G008520 | 2.771 | 0.00804     | Transport                    | Plasma membrane proton ATPase 4 (HA4)                         | 0.00E+00  |
| T2-L2 | blue | Csa6G514850 | 3.048 | 0.00009803  | Miscellaneous                | Cytochrome P450 family 77 subfamily B polypeptide 1 (CYP77B1) | 1.00E-241 |
| T2-L2 | blue | Csa5G604150 | 3.14  | 0.01        | Redox                        | Thioredoxin 2 (TRX2)                                          |           |
| T2-L2 | blue | Csa5G223070 | 3.216 | 0.003151    | Transcription factor         | WRKY DNA-binding protein 54 (WRKY54)                          | 3.00E-96  |
| T2-L2 | blue | Csa2G359890 | 3.289 | 3.70E-03    | Not assigned                 | unknown                                                       |           |
| T2-L2 | blue | Csa1G596520 | 3.4   | 0.0002165   | Protein degradation          | Cystein proteinases superfamily protein                       | 2.00E-168 |
| T2-L2 | blue | Csa7G395800 | 3.415 | 0.001823    | Miscellaneous                | Glutathione S-transferase phi 8 (GSTF8)                       | 3.00E-82  |
| T2-L2 | blue | Csa3G119700 | 3.575 | 0.00005376  | Transcription factor         | WRKY DNA-binding protein 53 (WRKY53)                          | 1.00E-102 |
| T2-L2 | blue | Csa6G381850 | 3.831 | 0.001156    | Transport                    | Amino acid permease 3 (AAP3)                                  | 2.00E-234 |
| T2-L2 | blue | Csa1G033160 | 4.495 | 0.006049    | Miscellaneous                | Glutathione S-transferase tau 9 (GSTU9)                       | 3.00E-68  |
| T2-L2 | blue | Csa6G486960 | 4.496 | 0.000002502 | Transcription factor         | WRKY DNA-binding protein 51 (WRKY51)                          | 1.00E-36  |
| T2-L2 | blue | Csa2G058620 | 5.345 | 0.003945    | Abiotic stress               | DNAJ heat shock N-terminal domain-containing protein          | 2.00E-137 |

Supplementary Table 1 (Continued)

|       |      |             |       |             |                              |                                                               |           |
|-------|------|-------------|-------|-------------|------------------------------|---------------------------------------------------------------|-----------|
| T2-L2 | blue | Csa1G574970 | 1.827 | 1.18E-05    | Major CHO metabolism         | Hexokinase 2 (HXK2)                                           | 7.00E-51  |
| T2-L2 | blue | Csa4G618520 | 1.837 | 0.0001765   | Biodegradation of xenobiotic | UDP glycosyltransferase (UGT)                                 | 1.00E-132 |
| T2-L2 | blue | Csa2G003610 | 1.841 | 0.0003098   | Lipid metabolism             | Abnormal inflorescence meristem (AIM1)                        | 3.00E-294 |
| T2-L2 | blue | Csa3G730930 | 1.847 | 0.00004243  | Transport                    | Ammonium transporter 2 (AMT2)                                 | 8E-220    |
| T2-L2 | blue | Csa6G493850 | 1.86  | 1.50E-05    | Not assigned                 | unknown                                                       |           |
| T2-L2 | blue | Csa3G159420 | 1.871 | 1.61E-03    | Not assigned                 | unknown                                                       |           |
| T2-L2 | blue | Csa1G528610 | 1.874 | 0.00435     | Lipid metabolism             | Thylakoid membrane anion transporter 1 (ANTR1)                | 7.00E-236 |
| T2-L2 | blue | Csa1G181360 | 1.875 | 0.001947    | Transport                    | non-intrinsic ABC protein 9 (NAP9)                            | 3.00E-156 |
| T2-L2 | blue | Csa3G154410 | 2.05  | 1.63E-10    | Not assigned                 | unknown                                                       |           |
| T2-L2 | blue | Csa3G183950 | 2.092 | 0.0004285   | Abiotic stress               | Heat shock protein 83                                         | 0.00E+00  |
| T2-L2 | blue | Csa2G296090 | 2.143 | 2.44E-04    | Not assigned                 | unknown                                                       |           |
| T2-L2 | blue | Csa7G291720 | 2.169 | 0.006566    | Lipid metabolism             | Choline kinase                                                | 4.00E-133 |
| T2-L2 | blue | Csa2G427310 | 2.238 | 0.007581    | Transcription factor         | MYB domain protein 73 (MYB73)                                 | 1.00E-88  |
| T2-L2 | blue | Csa3G881750 | 2.24  | 0.009561    | Lipid metabolism             | PR5-like receptor kinase (PR5K)                               | 4.00E-154 |
| T2-L2 | blue | Csa5G589260 | 2.243 | 0           | Amino acid metabolism        | O-acetylserine(thiol) lyase (OAS-TL)                          | 4.00E-162 |
| T2-L2 | blue | Csa3G733350 | 2.317 | 0.00004435  | Cell organization            | RHO guanyl-nucleotide exchange factor 11 (ROPGEF11)           | 9.00E-41  |
| T2-L2 | blue | Csa2G004690 | 2.522 | 0.000004593 | Transcription factor         | Heat shock transcription factor C1 (HSFC1)                    | 5.00E-67  |
| T2-L2 | blue | Csa7G387690 | 2.631 | 0.000001654 | Transport                    | Sulfate transporter 3;1 (SULTR 3;1)                           | 3.00E-307 |
| T2-L2 | blue | Csa1G008520 | 2.771 | 0.00804     | Transport                    | Plasma membrane proton ATPase 4 (HA4)                         | 0.00E+00  |
| T2-L2 | blue | Csa6G514850 | 3.048 | 0.00009803  | Miscellaneous                | Cytochrome P450 family 77 subfamily B polypeptide 1 (CYP77B1) | 1.00E-241 |
| T2-L2 | blue | Csa5G604150 | 3.14  | 0.01        | Redox                        | Thioredoxin 2 (TRX2)                                          |           |
| T2-L2 | blue | Csa5G223070 | 3.216 | 0.003151    | Transcription factor         | WRKY DNA-binding protein 54 (WRKY54)                          | 3.00E-96  |
| T2-L2 | blue | Csa2G359890 | 3.289 | 3.70E-03    | Not assigned                 | unknown                                                       |           |
| T2-L2 | blue | Csa1G596520 | 3.4   | 0.0002165   | Protein degradation          | Cystein proteinases superfamily protein                       | 2.00E-168 |
| T2-L2 | blue | Csa7G395800 | 3.415 | 0.001823    | Miscellaneous                | Glutathione S-transferase phi 8 (GSTF8)                       | 3.00E-82  |
| T2-L2 | blue | Csa3G119700 | 3.575 | 0.00005376  | Transcription factor         | WRKY DNA-binding protein 53 (WRKY53)                          | 1.00E-102 |
| T2-L2 | blue | Csa6G381850 | 3.831 | 0.001156    | Transport                    | Amino acid permease 3 (AAP3)                                  | 2.00E-234 |
| T2-L2 | blue | Csa1G033160 | 4.495 | 0.006049    | Miscellaneous                | Glutathione S-transferase tau 9 (GSTU9)                       | 3.00E-68  |
| T2-L2 | blue | Csa6G486960 | 4.496 | 0.000002502 | Transcription factor         | WRKY DNA-binding protein 51 (WRKY51)                          | 1.00E-36  |
| T2-L2 | blue | Csa2G058620 | 5.345 | 0.003945    | Abiotic stress               | DNAJ heat shock N-terminal domain-containing protein          | 2.00E-137 |

Supplementary Table 1 (Continued)

|       |      |             |       |             |                              |                                                               |           |
|-------|------|-------------|-------|-------------|------------------------------|---------------------------------------------------------------|-----------|
| T2-L2 | blue | Csa1G574970 | 1.827 | 1.18E-05    | Major CHO metabolism         | Hexokinase 2 (HXK2)                                           | 7.00E-51  |
| T2-L2 | blue | Csa4G618520 | 1.837 | 0.0001765   | Biodegradation of xenobiotic | UDP glycosyltransferase (UGT)                                 | 1.00E-132 |
| T2-L2 | blue | Csa2G003610 | 1.841 | 0.0003098   | Lipid metabolism             | Abnormal inflorescence meristem (AIM1)                        | 3.00E-294 |
| T2-L2 | blue | Csa3G730930 | 1.847 | 0.00004243  | Transport                    | Ammonium transporter 2 (AMT2)                                 | 8E-220    |
| T2-L2 | blue | Csa6G493850 | 1.86  | 1.50E-05    | Not assigned                 | unknown                                                       |           |
| T2-L2 | blue | Csa3G159420 | 1.871 | 1.61E-03    | Not assigned                 | unknown                                                       |           |
| T2-L2 | blue | Csa1G528610 | 1.874 | 0.00435     | Lipid metabolism             | Thylakoid membrane anion transporter 1 (ANTR1)                | 7.00E-236 |
| T2-L2 | blue | Csa1G181360 | 1.875 | 0.001947    | Transport                    | non-intrinsic ABC protein 9 (NAP9)                            | 3.00E-156 |
| T2-L2 | blue | Csa3G154410 | 2.05  | 1.63E-10    | Not assigned                 | unknown                                                       |           |
| T2-L2 | blue | Csa3G183950 | 2.092 | 0.0004285   | Abiotic stress               | Heat shock protein 83                                         | 0.00E+00  |
| T2-L2 | blue | Csa2G296090 | 2.143 | 2.44E-04    | Not assigned                 | unknown                                                       |           |
| T2-L2 | blue | Csa7G291720 | 2.169 | 0.006566    | Lipid metabolism             | Choline kinase                                                | 4.00E-133 |
| T2-L2 | blue | Csa2G427310 | 2.238 | 0.007581    | Transcription factor         | MYB domain protein 73 (MYB73)                                 | 1.00E-88  |
| T2-L2 | blue | Csa3G881750 | 2.24  | 0.009561    | Lipid metabolism             | PR5-like receptor kinase (PR5K)                               | 4.00E-154 |
| T2-L2 | blue | Csa5G589260 | 2.243 | 0           | Amino acid metabolism        | O-acetylserine(thiol) lyase (OAS-TL)                          | 4.00E-162 |
| T2-L2 | blue | Csa3G733350 | 2.317 | 0.00004435  | Cell organization            | RHO guanyl-nucleotide exchange factor 11 (ROPGEF11)           | 9.00E-41  |
| T2-L2 | blue | Csa2G004690 | 2.522 | 0.000004593 | Transcription factor         | Heat shock transcription factor C1 (HSFC1)                    | 5.00E-67  |
| T2-L2 | blue | Csa7G387690 | 2.631 | 0.000001654 | Transport                    | Sulfate transporter 3;1 (SULTR 3;1)                           | 3.00E-307 |
| T2-L2 | blue | Csa1G008520 | 2.771 | 0.00804     | Transport                    | Plasma membrane proton ATPase 4 (HA4)                         | 0.00E+00  |
| T2-L2 | blue | Csa6G514850 | 3.048 | 0.00009803  | Miscellaneous                | Cytochrome P450 family 77 subfamily B polypeptide 1 (CYP77B1) | 1.00E-241 |
| T2-L2 | blue | Csa5G604150 | 3.14  | 0.01        | Redox                        | Thioredoxin 2 (TRX2)                                          |           |
| T2-L2 | blue | Csa5G223070 | 3.216 | 0.003151    | Transcription factor         | WRKY DNA-binding protein 54 (WRKY54)                          | 3.00E-96  |
| T2-L2 | blue | Csa2G359890 | 3.289 | 3.70E-03    | Not assigned                 | unknown                                                       |           |
| T2-L2 | blue | Csa1G596520 | 3.4   | 0.0002165   | Protein degradation          | Cystein proteinases superfamily protein                       | 2.00E-168 |
| T2-L2 | blue | Csa7G395800 | 3.415 | 0.001823    | Miscellaneous                | Glutathione S-transferase phi 8 (GSTF8)                       | 3.00E-82  |
| T2-L2 | blue | Csa3G119700 | 3.575 | 0.00005376  | Transcription factor         | WRKY DNA-binding protein 53 (WRKY53)                          | 1.00E-102 |
| T2-L2 | blue | Csa6G381850 | 3.831 | 0.001156    | Transport                    | Amino acid permease 3 (AAP3)                                  | 2.00E-234 |
| T2-L2 | blue | Csa1G033160 | 4.495 | 0.006049    | Miscellaneous                | Glutathione S-transferase tau 9 (GSTU9)                       | 3.00E-68  |
| T2-L2 | blue | Csa6G486960 | 4.496 | 0.000002502 | Transcription factor         | WRKY DNA-binding protein 51 (WRKY51)                          | 1.00E-36  |
| T2-L2 | blue | Csa2G058620 | 5.345 | 0.003945    | Abiotic stress               | DNAJ heat shock N-terminal domain-containing protein          | 2.00E-137 |

Supplementary Table 1 (Continued)

|       |      |             |       |             |                              |                                                               |           |
|-------|------|-------------|-------|-------------|------------------------------|---------------------------------------------------------------|-----------|
| T2-L2 | blue | Csa1G574970 | 1.827 | 1.18E-05    | Major CHO metabolism         | Hexokinase 2 (HXK2)                                           | 7.00E-51  |
| T2-L2 | blue | Csa4G618520 | 1.837 | 0.0001765   | Biodegradation of xenobiotic | UDP glycosyltransferase (UGT)                                 | 1.00E-132 |
| T2-L2 | blue | Csa2G003610 | 1.841 | 0.0003098   | Lipid metabolism             | Abnormal inflorescence meristem (AIM1)                        | 3.00E-294 |
| T2-L2 | blue | Csa3G730930 | 1.847 | 0.00004243  | Transport                    | Ammonium transporter 2 (AMT2)                                 | 8E-220    |
| T2-L2 | blue | Csa6G493850 | 1.86  | 1.50E-05    | Not assigned                 | unknown                                                       |           |
| T2-L2 | blue | Csa3G159420 | 1.871 | 1.61E-03    | Not assigned                 | unknown                                                       |           |
| T2-L2 | blue | Csa1G528610 | 1.874 | 0.00435     | Lipid metabolism             | Thylakoid membrane anion transporter 1 (ANTR1)                | 7.00E-236 |
| T2-L2 | blue | Csa1G181360 | 1.875 | 0.001947    | Transport                    | non-intrinsic ABC protein 9 (NAP9)                            | 3.00E-156 |
| T2-L2 | blue | Csa3G154410 | 2.05  | 1.63E-10    | Not assigned                 | unknown                                                       |           |
| T2-L2 | blue | Csa3G183950 | 2.092 | 0.0004285   | Abiotic stress               | Heat shock protein 83                                         | 0.00E+00  |
| T2-L2 | blue | Csa2G296090 | 2.143 | 2.44E-04    | Not assigned                 | unknown                                                       |           |
| T2-L2 | blue | Csa7G291720 | 2.169 | 0.006566    | Lipid metabolism             | Choline kinase                                                | 4.00E-133 |
| T2-L2 | blue | Csa2G427310 | 2.238 | 0.007581    | Transcription factor         | MYB domain protein 73 (MYB73)                                 | 1.00E-88  |
| T2-L2 | blue | Csa3G881750 | 2.24  | 0.009561    | Lipid metabolism             | PR5-like receptor kinase (PR5K)                               | 4.00E-154 |
| T2-L2 | blue | Csa5G589260 | 2.243 | 0           | Amino acid metabolism        | O-acetylserine(thiol) lyase (OAS-TL)                          | 4.00E-162 |
| T2-L2 | blue | Csa3G733350 | 2.317 | 0.00004435  | Cell organization            | RHO guanyl-nucleotide exchange factor 11 (ROPGEF11)           | 9.00E-41  |
| T2-L2 | blue | Csa2G004690 | 2.522 | 0.000004593 | Transcription factor         | Heat shock transcription factor C1 (HSFC1)                    | 5.00E-67  |
| T2-L2 | blue | Csa7G387690 | 2.631 | 0.000001654 | Transport                    | Sulfate transporter 3;1 (SULTR 3;1)                           | 3.00E-307 |
| T2-L2 | blue | Csa1G008520 | 2.771 | 0.00804     | Transport                    | Plasma membrane proton ATPase 4 (HA4)                         | 0.00E+00  |
| T2-L2 | blue | Csa6G514850 | 3.048 | 0.00009803  | Miscellaneous                | Cytochrome P450 family 77 subfamily B polypeptide 1 (CYP77B1) | 1.00E-241 |
| T2-L2 | blue | Csa5G604150 | 3.14  | 0.01        | Redox                        | Thioredoxin 2 (TRX2)                                          |           |
| T2-L2 | blue | Csa5G223070 | 3.216 | 0.003151    | Transcription factor         | WRKY DNA-binding protein 54 (WRKY54)                          | 3.00E-96  |
| T2-L2 | blue | Csa2G359890 | 3.289 | 3.70E-03    | Not assigned                 | unknown                                                       |           |
| T2-L2 | blue | Csa1G596520 | 3.4   | 0.0002165   | Protein degradation          | Cystein proteinases superfamily protein                       | 2.00E-168 |
| T2-L2 | blue | Csa7G395800 | 3.415 | 0.001823    | Miscellaneous                | Glutathione S-transferase phi 8 (GSTF8)                       | 3.00E-82  |
| T2-L2 | blue | Csa3G119700 | 3.575 | 0.00005376  | Transcription factor         | WRKY DNA-binding protein 53 (WRKY53)                          | 1.00E-102 |
| T2-L2 | blue | Csa6G381850 | 3.831 | 0.001156    | Transport                    | Amino acid permease 3 (AAP3)                                  | 2.00E-234 |
| T2-L2 | blue | Csa1G033160 | 4.495 | 0.006049    | Miscellaneous                | Glutathione S-transferase tau 9 (GSTU9)                       | 3.00E-68  |
| T2-L2 | blue | Csa6G486960 | 4.496 | 0.000002502 | Transcription factor         | WRKY DNA-binding protein 51 (WRKY51)                          | 1.00E-36  |
| T2-L2 | blue | Csa2G058620 | 5.345 | 0.003945    | Abiotic stress               | DNAJ heat shock N-terminal domain-containing protein          | 2.00E-137 |

Supplementary Table 1 (Continued)

|       |      |             |       |             |                              |                                                               |           |
|-------|------|-------------|-------|-------------|------------------------------|---------------------------------------------------------------|-----------|
| T2-L2 | blue | Csa1G574970 | 1.827 | 1.18E-05    | Major CHO metabolism         | Hexokinase 2 (HXK2)                                           | 7.00E-51  |
| T2-L2 | blue | Csa4G618520 | 1.837 | 0.0001765   | Biodegradation of xenobiotic | UDP glycosyltransferase (UGT)                                 | 1.00E-132 |
| T2-L2 | blue | Csa2G003610 | 1.841 | 0.0003098   | Lipid metabolism             | Abnormal inflorescence meristem (AIM1)                        | 3.00E-294 |
| T2-L2 | blue | Csa3G730930 | 1.847 | 0.00004243  | Transport                    | Ammonium transporter 2 (AMT2)                                 | 8E-220    |
| T2-L2 | blue | Csa6G493850 | 1.86  | 1.50E-05    | Not assigned                 | unknown                                                       |           |
| T2-L2 | blue | Csa3G159420 | 1.871 | 1.61E-03    | Not assigned                 | unknown                                                       |           |
| T2-L2 | blue | Csa1G528610 | 1.874 | 0.00435     | Lipid metabolism             | Thylakoid membrane anion transporter 1 (ANTR1)                | 7.00E-236 |
| T2-L2 | blue | Csa1G181360 | 1.875 | 0.001947    | Transport                    | non-intrinsic ABC protein 9 (NAP9)                            | 3.00E-156 |
| T2-L2 | blue | Csa3G154410 | 2.05  | 1.63E-10    | Not assigned                 | unknown                                                       |           |
| T2-L2 | blue | Csa3G183950 | 2.092 | 0.0004285   | Abiotic stress               | Heat shock protein 83                                         | 0.00E+00  |
| T2-L2 | blue | Csa2G296090 | 2.143 | 2.44E-04    | Not assigned                 | unknown                                                       |           |
| T2-L2 | blue | Csa7G291720 | 2.169 | 0.006566    | Lipid metabolism             | Choline kinase                                                | 4.00E-133 |
| T2-L2 | blue | Csa2G427310 | 2.238 | 0.007581    | Transcription factor         | MYB domain protein 73 (MYB73)                                 | 1.00E-88  |
| T2-L2 | blue | Csa3G881750 | 2.24  | 0.009561    | Lipid metabolism             | PR5-like receptor kinase (PR5K)                               | 4.00E-154 |
| T2-L2 | blue | Csa5G589260 | 2.243 | 0           | Amino acid metabolism        | O-acetylserine(thiol) lyase (OAS-TL)                          | 4.00E-162 |
| T2-L2 | blue | Csa3G733350 | 2.317 | 0.00004435  | Cell organization            | RHO guanyl-nucleotide exchange factor 11 (ROPGEF11)           | 9.00E-41  |
| T2-L2 | blue | Csa2G004690 | 2.522 | 0.000004593 | Transcription factor         | Heat shock transcription factor C1 (HSFC1)                    | 5.00E-67  |
| T2-L2 | blue | Csa7G387690 | 2.631 | 0.000001654 | Transport                    | Sulfate transporter 3;1 (SULTR 3;1)                           | 3.00E-307 |
| T2-L2 | blue | Csa1G008520 | 2.771 | 0.00804     | Transport                    | Plasma membrane proton ATPase 4 (HA4)                         | 0.00E+00  |
| T2-L2 | blue | Csa6G514850 | 3.048 | 0.00009803  | Miscellaneous                | Cytochrome P450 family 77 subfamily B polypeptide 1 (CYP77B1) | 1.00E-241 |
| T2-L2 | blue | Csa5G604150 | 3.14  | 0.01        | Redox                        | Thioredoxin 2 (TRX2)                                          |           |
| T2-L2 | blue | Csa5G223070 | 3.216 | 0.003151    | Transcription factor         | WRKY DNA-binding protein 54 (WRKY54)                          | 3.00E-96  |
| T2-L2 | blue | Csa2G359890 | 3.289 | 3.70E-03    | Not assigned                 | unknown                                                       |           |
| T2-L2 | blue | Csa1G596520 | 3.4   | 0.0002165   | Protein degradation          | Cystein proteinases superfamily protein                       | 2.00E-168 |
| T2-L2 | blue | Csa7G395800 | 3.415 | 0.001823    | Miscellaneous                | Glutathione S-transferase phi 8 (GSTF8)                       | 3.00E-82  |
| T2-L2 | blue | Csa3G119700 | 3.575 | 0.00005376  | Transcription factor         | WRKY DNA-binding protein 53 (WRKY53)                          | 1.00E-102 |
| T2-L2 | blue | Csa6G381850 | 3.831 | 0.001156    | Transport                    | Amino acid permease 3 (AAP3)                                  | 2.00E-234 |
| T2-L2 | blue | Csa1G033160 | 4.495 | 0.006049    | Miscellaneous                | Glutathione S-transferase tau 9 (GSTU9)                       | 3.00E-68  |
| T2-L2 | blue | Csa6G486960 | 4.496 | 0.000002502 | Transcription factor         | WRKY DNA-binding protein 51 (WRKY51)                          | 1.00E-36  |
| T2-L2 | blue | Csa2G058620 | 5.345 | 0.003945    | Abiotic stress               | DNAJ heat shock N-terminal domain-containing protein          | 2.00E-137 |



Supplementary Table 1 (Continued)

|       |      |             |       |             |                              |                                                               |           |
|-------|------|-------------|-------|-------------|------------------------------|---------------------------------------------------------------|-----------|
| T2-L2 | blue | Csa1G574970 | 1.827 | 1.18E-05    | Major CHO metabolism         | Hexokinase 2 (HXK2)                                           | 7.00E-51  |
| T2-L2 | blue | Csa4G618520 | 1.837 | 0.0001765   | Biodegradation of xenobiotic | UDP glycosyltransferase (UGT)                                 | 1.00E-132 |
| T2-L2 | blue | Csa2G003610 | 1.841 | 0.0003098   | Lipid metabolism             | Abnormal inflorescence meristem (AIM1)                        | 3.00E-294 |
| T2-L2 | blue | Csa3G730930 | 1.847 | 0.00004243  | Transport                    | Ammonium transporter 2 (AMT2)                                 | 8E-220    |
| T2-L2 | blue | Csa6G493850 | 1.86  | 1.50E-05    | Not assigned                 | unknown                                                       |           |
| T2-L2 | blue | Csa3G159420 | 1.871 | 1.61E-03    | Not assigned                 | unknown                                                       |           |
| T2-L2 | blue | Csa1G528610 | 1.874 | 0.00435     | Lipid metabolism             | Thylakoid membrane anion transporter 1 (ANTR1)                | 7.00E-236 |
| T2-L2 | blue | Csa1G181360 | 1.875 | 0.001947    | Transport                    | non-intrinsic ABC protein 9 (NAP9)                            | 3.00E-156 |
| T2-L2 | blue | Csa3G154410 | 2.05  | 1.63E-10    | Not assigned                 | unknown                                                       |           |
| T2-L2 | blue | Csa3G183950 | 2.092 | 0.0004285   | Abiotic stress               | Heat shock protein 83                                         | 0.00E+00  |
| T2-L2 | blue | Csa2G296090 | 2.143 | 2.44E-04    | Not assigned                 | unknown                                                       |           |
| T2-L2 | blue | Csa7G291720 | 2.169 | 0.006566    | Lipid metabolism             | Choline kinase                                                | 4.00E-133 |
| T2-L2 | blue | Csa2G427310 | 2.238 | 0.007581    | Transcription factor         | MYB domain protein 73 (MYB73)                                 | 1.00E-88  |
| T2-L2 | blue | Csa3G881750 | 2.24  | 0.009561    | Lipid metabolism             | PR5-like receptor kinase (PR5K)                               | 4.00E-154 |
| T2-L2 | blue | Csa5G589260 | 2.243 | 0           | Amino acid metabolism        | O-acetylserine(thiol) lyase (OAS-TL)                          | 4.00E-162 |
| T2-L2 | blue | Csa3G733350 | 2.317 | 0.00004435  | Cell organization            | RHO guanyl-nucleotide exchange factor 11 (ROPGEF11)           | 9.00E-41  |
| T2-L2 | blue | Csa2G004690 | 2.522 | 0.000004593 | Transcription factor         | Heat shock transcription factor C1 (HSFC1)                    | 5.00E-67  |
| T2-L2 | blue | Csa7G387690 | 2.631 | 0.000001654 | Transport                    | Sulfate transporter 3;1 (SULTR 3;1)                           | 3.00E-307 |
| T2-L2 | blue | Csa1G008520 | 2.771 | 0.00804     | Transport                    | Plasma membrane proton ATPase 4 (HA4)                         | 0.00E+00  |
| T2-L2 | blue | Csa6G514850 | 3.048 | 0.00009803  | Miscellaneous                | Cytochrome P450 family 77 subfamily B polypeptide 1 (CYP77B1) | 1.00E-241 |
| T2-L2 | blue | Csa5G604150 | 3.14  | 0.01        | Redox                        | Thioredoxin 2 (TRX2)                                          |           |
| T2-L2 | blue | Csa5G223070 | 3.216 | 0.003151    | Transcription factor         | WRKY DNA-binding protein 54 (WRKY54)                          | 3.00E-96  |
| T2-L2 | blue | Csa2G359890 | 3.289 | 3.70E-03    | Not assigned                 | unknown                                                       |           |
| T2-L2 | blue | Csa1G596520 | 3.4   | 0.0002165   | Protein degradation          | Cystein proteinases superfamily protein                       | 2.00E-168 |
| T2-L2 | blue | Csa7G395800 | 3.415 | 0.001823    | Miscellaneous                | Glutathione S-transferase phi 8 (GSTF8)                       | 3.00E-82  |
| T2-L2 | blue | Csa3G119700 | 3.575 | 0.00005376  | Transcription factor         | WRKY DNA-binding protein 53 (WRKY53)                          | 1.00E-102 |
| T2-L2 | blue | Csa6G381850 | 3.831 | 0.001156    | Transport                    | Amino acid permease 3 (AAP3)                                  | 2.00E-234 |
| T2-L2 | blue | Csa1G033160 | 4.495 | 0.006049    | Miscellaneous                | Glutathione S-transferase tau 9 (GSTU9)                       | 3.00E-68  |
| T2-L2 | blue | Csa6G486960 | 4.496 | 0.000002502 | Transcription factor         | WRKY DNA-binding protein 51 (WRKY51)                          | 1.00E-36  |
| T2-L2 | blue | Csa2G058620 | 5.345 | 0.003945    | Abiotic stress               | DNAJ heat shock N-terminal domain-containing protein          | 2.00E-137 |

Supplementary Table 1 (Continued)

|       |      |             |       |             |                              |                                                               |           |
|-------|------|-------------|-------|-------------|------------------------------|---------------------------------------------------------------|-----------|
| T2-L2 | blue | Csa1G574970 | 1.827 | 1.18E-05    | Major CHO metabolism         | Hexokinase 2 (HXK2)                                           | 7.00E-51  |
| T2-L2 | blue | Csa4G618520 | 1.837 | 0.0001765   | Biodegradation of xenobiotic | UDP glycosyltransferase (UGT)                                 | 1.00E-132 |
| T2-L2 | blue | Csa2G003610 | 1.841 | 0.0003098   | Lipid metabolism             | Abnormal inflorescence meristem (AIM1)                        | 3.00E-294 |
| T2-L2 | blue | Csa3G730930 | 1.847 | 0.00004243  | Transport                    | Ammonium transporter 2 (AMT2)                                 | 8E-220    |
| T2-L2 | blue | Csa6G493850 | 1.86  | 1.50E-05    | Not assigned                 | unknown                                                       |           |
| T2-L2 | blue | Csa3G159420 | 1.871 | 1.61E-03    | Not assigned                 | unknown                                                       |           |
| T2-L2 | blue | Csa1G528610 | 1.874 | 0.00435     | Lipid metabolism             | Thylakoid membrane anion transporter 1 (ANTR1)                | 7.00E-236 |
| T2-L2 | blue | Csa1G181360 | 1.875 | 0.001947    | Transport                    | non-intrinsic ABC protein 9 (NAP9)                            | 3.00E-156 |
| T2-L2 | blue | Csa3G154410 | 2.05  | 1.63E-10    | Not assigned                 | unknown                                                       |           |
| T2-L2 | blue | Csa3G183950 | 2.092 | 0.0004285   | Abiotic stress               | Heat shock protein 83                                         | 0.00E+00  |
| T2-L2 | blue | Csa2G296090 | 2.143 | 2.44E-04    | Not assigned                 | unknown                                                       |           |
| T2-L2 | blue | Csa7G291720 | 2.169 | 0.006566    | Lipid metabolism             | Choline kinase                                                | 4.00E-133 |
| T2-L2 | blue | Csa2G427310 | 2.238 | 0.007581    | Transcription factor         | MYB domain protein 73 (MYB73)                                 | 1.00E-88  |
| T2-L2 | blue | Csa3G881750 | 2.24  | 0.009561    | Lipid metabolism             | PR5-like receptor kinase (PR5K)                               | 4.00E-154 |
| T2-L2 | blue | Csa5G589260 | 2.243 | 0           | Amino acid metabolism        | O-acetylserine(thiol) lyase (OAS-TL)                          | 4.00E-162 |
| T2-L2 | blue | Csa3G733350 | 2.317 | 0.00004435  | Cell organization            | RHO guanyl-nucleotide exchange factor 11 (ROPGEF11)           | 9.00E-41  |
| T2-L2 | blue | Csa2G004690 | 2.522 | 0.000004593 | Transcription factor         | Heat shock transcription factor C1 (HSFC1)                    | 5.00E-67  |
| T2-L2 | blue | Csa7G387690 | 2.631 | 0.000001654 | Transport                    | Sulfate transporter 3;1 (SULTR 3;1)                           | 3.00E-307 |
| T2-L2 | blue | Csa1G008520 | 2.771 | 0.00804     | Transport                    | Plasma membrane proton ATPase 4 (HA4)                         | 0.00E+00  |
| T2-L2 | blue | Csa6G514850 | 3.048 | 0.00009803  | Miscellaneous                | Cytochrome P450 family 77 subfamily B polypeptide 1 (CYP77B1) | 1.00E-241 |
| T2-L2 | blue | Csa5G604150 | 3.14  | 0.01        | Redox                        | Thioredoxin 2 (TRX2)                                          |           |
| T2-L2 | blue | Csa5G223070 | 3.216 | 0.003151    | Transcription factor         | WRKY DNA-binding protein 54 (WRKY54)                          | 3.00E-96  |
| T2-L2 | blue | Csa2G359890 | 3.289 | 3.70E-03    | Not assigned                 | unknown                                                       |           |
| T2-L2 | blue | Csa1G596520 | 3.4   | 0.0002165   | Protein degradation          | Cystein proteinases superfamily protein                       | 2.00E-168 |
| T2-L2 | blue | Csa7G395800 | 3.415 | 0.001823    | Miscellaneous                | Glutathione S-transferase phi 8 (GSTF8)                       | 3.00E-82  |
| T2-L2 | blue | Csa3G119700 | 3.575 | 0.00005376  | Transcription factor         | WRKY DNA-binding protein 53 (WRKY53)                          | 1.00E-102 |
| T2-L2 | blue | Csa6G381850 | 3.831 | 0.001156    | Transport                    | Amino acid permease 3 (AAP3)                                  | 2.00E-234 |
| T2-L2 | blue | Csa1G033160 | 4.495 | 0.006049    | Miscellaneous                | Glutathione S-transferase tau 9 (GSTU9)                       | 3.00E-68  |
| T2-L2 | blue | Csa6G486960 | 4.496 | 0.000002502 | Transcription factor         | WRKY DNA-binding protein 51 (WRKY51)                          | 1.00E-36  |
| T2-L2 | blue | Csa2G058620 | 5.345 | 0.003945    | Abiotic stress               | DNAJ heat shock N-terminal domain-containing protein          | 2.00E-137 |

Supplementary Table 1 (Continued)

|       |      |             |       |             |                              |                                                               |           |
|-------|------|-------------|-------|-------------|------------------------------|---------------------------------------------------------------|-----------|
| T2-L2 | blue | Csa1G574970 | 1.827 | 1.18E-05    | Major CHO metabolism         | Hexokinase 2 (HXK2)                                           | 7.00E-51  |
| T2-L2 | blue | Csa4G618520 | 1.837 | 0.0001765   | Biodegradation of xenobiotic | UDP glycosyltransferase (UGT)                                 | 1.00E-132 |
| T2-L2 | blue | Csa2G003610 | 1.841 | 0.0003098   | Lipid metabolism             | Abnormal inflorescence meristem (AIM1)                        | 3.00E-294 |
| T2-L2 | blue | Csa3G730930 | 1.847 | 0.00004243  | Transport                    | Ammonium transporter 2 (AMT2)                                 | 8E-220    |
| T2-L2 | blue | Csa6G493850 | 1.86  | 1.50E-05    | Not assigned                 | unknown                                                       |           |
| T2-L2 | blue | Csa3G159420 | 1.871 | 1.61E-03    | Not assigned                 | unknown                                                       |           |
| T2-L2 | blue | Csa1G528610 | 1.874 | 0.00435     | Lipid metabolism             | Thylakoid membrane anion transporter 1 (ANTR1)                | 7.00E-236 |
| T2-L2 | blue | Csa1G181360 | 1.875 | 0.001947    | Transport                    | non-intrinsic ABC protein 9 (NAP9)                            | 3.00E-156 |
| T2-L2 | blue | Csa3G154410 | 2.05  | 1.63E-10    | Not assigned                 | unknown                                                       |           |
| T2-L2 | blue | Csa3G183950 | 2.092 | 0.0004285   | Abiotic stress               | Heat shock protein 83                                         | 0.00E+00  |
| T2-L2 | blue | Csa2G296090 | 2.143 | 2.44E-04    | Not assigned                 | unknown                                                       |           |
| T2-L2 | blue | Csa7G291720 | 2.169 | 0.006566    | Lipid metabolism             | Choline kinase                                                | 4.00E-133 |
| T2-L2 | blue | Csa2G427310 | 2.238 | 0.007581    | Transcription factor         | MYB domain protein 73 (MYB73)                                 | 1.00E-88  |
| T2-L2 | blue | Csa3G881750 | 2.24  | 0.009561    | Lipid metabolism             | PR5-like receptor kinase (PR5K)                               | 4.00E-154 |
| T2-L2 | blue | Csa5G589260 | 2.243 | 0           | Amino acid metabolism        | O-acetylserine(thiol) lyase (OAS-TL)                          | 4.00E-162 |
| T2-L2 | blue | Csa3G733350 | 2.317 | 0.00004435  | Cell organization            | RHO guanyl-nucleotide exchange factor 11 (ROPGEF11)           | 9.00E-41  |
| T2-L2 | blue | Csa2G004690 | 2.522 | 0.000004593 | Transcription factor         | Heat shock transcription factor C1 (HSFC1)                    | 5.00E-67  |
| T2-L2 | blue | Csa7G387690 | 2.631 | 0.000001654 | Transport                    | Sulfate transporter 3;1 (SULTR 3;1)                           | 3.00E-307 |
| T2-L2 | blue | Csa1G008520 | 2.771 | 0.00804     | Transport                    | Plasma membrane proton ATPase 4 (HA4)                         | 0.00E+00  |
| T2-L2 | blue | Csa6G514850 | 3.048 | 0.00009803  | Miscellaneous                | Cytochrome P450 family 77 subfamily B polypeptide 1 (CYP77B1) | 1.00E-241 |
| T2-L2 | blue | Csa5G604150 | 3.14  | 0.01        | Redox                        | Thioredoxin 2 (TRX2)                                          |           |
| T2-L2 | blue | Csa5G223070 | 3.216 | 0.003151    | Transcription factor         | WRKY DNA-binding protein 54 (WRKY54)                          | 3.00E-96  |
| T2-L2 | blue | Csa2G359890 | 3.289 | 3.70E-03    | Not assigned                 | unknown                                                       |           |
| T2-L2 | blue | Csa1G596520 | 3.4   | 0.0002165   | Protein degradation          | Cystein proteinases superfamily protein                       | 2.00E-168 |
| T2-L2 | blue | Csa7G395800 | 3.415 | 0.001823    | Miscellaneous                | Glutathione S-transferase phi 8 (GSTF8)                       | 3.00E-82  |
| T2-L2 | blue | Csa3G119700 | 3.575 | 0.00005376  | Transcription factor         | WRKY DNA-binding protein 53 (WRKY53)                          | 1.00E-102 |
| T2-L2 | blue | Csa6G381850 | 3.831 | 0.001156    | Transport                    | Amino acid permease 3 (AAP3)                                  | 2.00E-234 |
| T2-L2 | blue | Csa1G033160 | 4.495 | 0.006049    | Miscellaneous                | Glutathione S-transferase tau 9 (GSTU9)                       | 3.00E-68  |
| T2-L2 | blue | Csa6G486960 | 4.496 | 0.000002502 | Transcription factor         | WRKY DNA-binding protein 51 (WRKY51)                          | 1.00E-36  |
| T2-L2 | blue | Csa2G058620 | 5.345 | 0.003945    | Abiotic stress               | DNAJ heat shock N-terminal domain-containing protein          | 2.00E-137 |

Supplementary Table 1 (Continued)

|       |      |             |       |             |                              |                                                               |           |
|-------|------|-------------|-------|-------------|------------------------------|---------------------------------------------------------------|-----------|
| T2-L2 | blue | Csa1G574970 | 1.827 | 1.18E-05    | Major CHO metabolism         | Hexokinase 2 (HXK2)                                           | 7.00E-51  |
| T2-L2 | blue | Csa4G618520 | 1.837 | 0.0001765   | Biodegradation of xenobiotic | UDP glycosyltransferase (UGT)                                 | 1.00E-132 |
| T2-L2 | blue | Csa2G003610 | 1.841 | 0.0003098   | Lipid metabolism             | Abnormal inflorescence meristem (AIM1)                        | 3.00E-294 |
| T2-L2 | blue | Csa3G730930 | 1.847 | 0.00004243  | Transport                    | Ammonium transporter 2 (AMT2)                                 | 8E-220    |
| T2-L2 | blue | Csa6G493850 | 1.86  | 1.50E-05    | Not assigned                 | unknown                                                       |           |
| T2-L2 | blue | Csa3G159420 | 1.871 | 1.61E-03    | Not assigned                 | unknown                                                       |           |
| T2-L2 | blue | Csa1G528610 | 1.874 | 0.00435     | Lipid metabolism             | Thylakoid membrane anion transporter 1 (ANTR1)                | 7.00E-236 |
| T2-L2 | blue | Csa1G181360 | 1.875 | 0.001947    | Transport                    | non-intrinsic ABC protein 9 (NAP9)                            | 3.00E-156 |
| T2-L2 | blue | Csa3G154410 | 2.05  | 1.63E-10    | Not assigned                 | unknown                                                       |           |
| T2-L2 | blue | Csa3G183950 | 2.092 | 0.0004285   | Abiotic stress               | Heat shock protein 83                                         | 0.00E+00  |
| T2-L2 | blue | Csa2G296090 | 2.143 | 2.44E-04    | Not assigned                 | unknown                                                       |           |
| T2-L2 | blue | Csa7G291720 | 2.169 | 0.006566    | Lipid metabolism             | Choline kinase                                                | 4.00E-133 |
| T2-L2 | blue | Csa2G427310 | 2.238 | 0.007581    | Transcription factor         | MYB domain protein 73 (MYB73)                                 | 1.00E-88  |
| T2-L2 | blue | Csa3G881750 | 2.24  | 0.009561    | Lipid metabolism             | PR5-like receptor kinase (PR5K)                               | 4.00E-154 |
| T2-L2 | blue | Csa5G589260 | 2.243 | 0           | Amino acid metabolism        | O-acetylserine(thiol) lyase (OAS-TL)                          | 4.00E-162 |
| T2-L2 | blue | Csa3G733350 | 2.317 | 0.00004435  | Cell organization            | RHO guanyl-nucleotide exchange factor 11 (ROPGEF11)           | 9.00E-41  |
| T2-L2 | blue | Csa2G004690 | 2.522 | 0.000004593 | Transcription factor         | Heat shock transcription factor C1 (HSFC1)                    | 5.00E-67  |
| T2-L2 | blue | Csa7G387690 | 2.631 | 0.000001654 | Transport                    | Sulfate transporter 3;1 (SULTR 3;1)                           | 3.00E-307 |
| T2-L2 | blue | Csa1G008520 | 2.771 | 0.00804     | Transport                    | Plasma membrane proton ATPase 4 (HA4)                         | 0.00E+00  |
| T2-L2 | blue | Csa6G514850 | 3.048 | 0.00009803  | Miscellaneous                | Cytochrome P450 family 77 subfamily B polypeptide 1 (CYP77B1) | 1.00E-241 |
| T2-L2 | blue | Csa5G604150 | 3.14  | 0.01        | Redox                        | Thioredoxin 2 (TRX2)                                          |           |
| T2-L2 | blue | Csa5G223070 | 3.216 | 0.003151    | Transcription factor         | WRKY DNA-binding protein 54 (WRKY54)                          | 3.00E-96  |
| T2-L2 | blue | Csa2G359890 | 3.289 | 3.70E-03    | Not assigned                 | unknown                                                       |           |
| T2-L2 | blue | Csa1G596520 | 3.4   | 0.0002165   | Protein degradation          | Cystein proteinases superfamily protein                       | 2.00E-168 |
| T2-L2 | blue | Csa7G395800 | 3.415 | 0.001823    | Miscellaneous                | Glutathione S-transferase phi 8 (GSTF8)                       | 3.00E-82  |
| T2-L2 | blue | Csa3G119700 | 3.575 | 0.00005376  | Transcription factor         | WRKY DNA-binding protein 53 (WRKY53)                          | 1.00E-102 |
| T2-L2 | blue | Csa6G381850 | 3.831 | 0.001156    | Transport                    | Amino acid permease 3 (AAP3)                                  | 2.00E-234 |
| T2-L2 | blue | Csa1G033160 | 4.495 | 0.006049    | Miscellaneous                | Glutathione S-transferase tau 9 (GSTU9)                       | 3.00E-68  |
| T2-L2 | blue | Csa6G486960 | 4.496 | 0.000002502 | Transcription factor         | WRKY DNA-binding protein 51 (WRKY51)                          | 1.00E-36  |
| T2-L2 | blue | Csa2G058620 | 5.345 | 0.003945    | Abiotic stress               | DNAJ heat shock N-terminal domain-containing protein          | 2.00E-137 |

Supplementary Table 1 (Continued)

|       |      |             |       |             |                              |                                                               |           |
|-------|------|-------------|-------|-------------|------------------------------|---------------------------------------------------------------|-----------|
| T2-L2 | blue | Csa1G574970 | 1.827 | 1.18E-05    | Major CHO metabolism         | Hexokinase 2 (HXK2)                                           | 7.00E-51  |
| T2-L2 | blue | Csa4G618520 | 1.837 | 0.0001765   | Biodegradation of xenobiotic | UDP glycosyltransferase (UGT)                                 | 1.00E-132 |
| T2-L2 | blue | Csa2G003610 | 1.841 | 0.0003098   | Lipid metabolism             | Abnormal inflorescence meristem (AIM1)                        | 3.00E-294 |
| T2-L2 | blue | Csa3G730930 | 1.847 | 0.00004243  | Transport                    | Ammonium transporter 2 (AMT2)                                 | 8E-220    |
| T2-L2 | blue | Csa6G493850 | 1.86  | 1.50E-05    | Not assigned                 | unknown                                                       |           |
| T2-L2 | blue | Csa3G159420 | 1.871 | 1.61E-03    | Not assigned                 | unknown                                                       |           |
| T2-L2 | blue | Csa1G528610 | 1.874 | 0.00435     | Lipid metabolism             | Thylakoid membrane anion transporter 1 (ANTR1)                | 7.00E-236 |
| T2-L2 | blue | Csa1G181360 | 1.875 | 0.001947    | Transport                    | non-intrinsic ABC protein 9 (NAP9)                            | 3.00E-156 |
| T2-L2 | blue | Csa3G154410 | 2.05  | 1.63E-10    | Not assigned                 | unknown                                                       |           |
| T2-L2 | blue | Csa3G183950 | 2.092 | 0.0004285   | Abiotic stress               | Heat shock protein 83                                         | 0.00E+00  |
| T2-L2 | blue | Csa2G296090 | 2.143 | 2.44E-04    | Not assigned                 | unknown                                                       |           |
| T2-L2 | blue | Csa7G291720 | 2.169 | 0.006566    | Lipid metabolism             | Choline kinase                                                | 4.00E-133 |
| T2-L2 | blue | Csa2G427310 | 2.238 | 0.007581    | Transcription factor         | MYB domain protein 73 (MYB73)                                 | 1.00E-88  |
| T2-L2 | blue | Csa3G881750 | 2.24  | 0.009561    | Lipid metabolism             | PR5-like receptor kinase (PR5K)                               | 4.00E-154 |
| T2-L2 | blue | Csa5G589260 | 2.243 | 0           | Amino acid metabolism        | O-acetylserine(thiol) lyase (OAS-TL)                          | 4.00E-162 |
| T2-L2 | blue | Csa3G733350 | 2.317 | 0.00004435  | Cell organization            | RHO guanyl-nucleotide exchange factor 11 (ROPGEF11)           | 9.00E-41  |
| T2-L2 | blue | Csa2G004690 | 2.522 | 0.000004593 | Transcription factor         | Heat shock transcription factor C1 (HSFC1)                    | 5.00E-67  |
| T2-L2 | blue | Csa7G387690 | 2.631 | 0.000001654 | Transport                    | Sulfate transporter 3;1 (SULTR 3;1)                           | 3.00E-307 |
| T2-L2 | blue | Csa1G008520 | 2.771 | 0.00804     | Transport                    | Plasma membrane proton ATPase 4 (HA4)                         | 0.00E+00  |
| T2-L2 | blue | Csa6G514850 | 3.048 | 0.00009803  | Miscellaneous                | Cytochrome P450 family 77 subfamily B polypeptide 1 (CYP77B1) | 1.00E-241 |
| T2-L2 | blue | Csa5G604150 | 3.14  | 0.01        | Redox                        | Thioredoxin 2 (TRX2)                                          |           |
| T2-L2 | blue | Csa5G223070 | 3.216 | 0.003151    | Transcription factor         | WRKY DNA-binding protein 54 (WRKY54)                          | 3.00E-96  |
| T2-L2 | blue | Csa2G359890 | 3.289 | 3.70E-03    | Not assigned                 | unknown                                                       |           |
| T2-L2 | blue | Csa1G596520 | 3.4   | 0.0002165   | Protein degradation          | Cystein proteinases superfamily protein                       | 2.00E-168 |
| T2-L2 | blue | Csa7G395800 | 3.415 | 0.001823    | Miscellaneous                | Glutathione S-transferase phi 8 (GSTF8)                       | 3.00E-82  |
| T2-L2 | blue | Csa3G119700 | 3.575 | 0.00005376  | Transcription factor         | WRKY DNA-binding protein 53 (WRKY53)                          | 1.00E-102 |
| T2-L2 | blue | Csa6G381850 | 3.831 | 0.001156    | Transport                    | Amino acid permease 3 (AAP3)                                  | 2.00E-234 |
| T2-L2 | blue | Csa1G033160 | 4.495 | 0.006049    | Miscellaneous                | Glutathione S-transferase tau 9 (GSTU9)                       | 3.00E-68  |
| T2-L2 | blue | Csa6G486960 | 4.496 | 0.000002502 | Transcription factor         | WRKY DNA-binding protein 51 (WRKY51)                          | 1.00E-36  |
| T2-L2 | blue | Csa2G058620 | 5.345 | 0.003945    | Abiotic stress               | DNAJ heat shock N-terminal domain-containing protein          | 2.00E-137 |

Supplementary Table 1 (Continued)

|       |      |             |       |             |                              |                                                               |           |
|-------|------|-------------|-------|-------------|------------------------------|---------------------------------------------------------------|-----------|
| T2-L2 | blue | Csa1G574970 | 1.827 | 1.18E-05    | Major CHO metabolism         | Hexokinase 2 (HXK2)                                           | 7.00E-51  |
| T2-L2 | blue | Csa4G618520 | 1.837 | 0.0001765   | Biodegradation of xenobiotic | UDP glycosyltransferase (UGT)                                 | 1.00E-132 |
| T2-L2 | blue | Csa2G003610 | 1.841 | 0.0003098   | Lipid metabolism             | Abnormal inflorescence meristem (AIM1)                        | 3.00E-294 |
| T2-L2 | blue | Csa3G730930 | 1.847 | 0.00004243  | Transport                    | Ammonium transporter 2 (AMT2)                                 | 8E-220    |
| T2-L2 | blue | Csa6G493850 | 1.86  | 1.50E-05    | Not assigned                 | unknown                                                       |           |
| T2-L2 | blue | Csa3G159420 | 1.871 | 1.61E-03    | Not assigned                 | unknown                                                       |           |
| T2-L2 | blue | Csa1G528610 | 1.874 | 0.00435     | Lipid metabolism             | Thylakoid membrane anion transporter 1 (ANTR1)                | 7.00E-236 |
| T2-L2 | blue | Csa1G181360 | 1.875 | 0.001947    | Transport                    | non-intrinsic ABC protein 9 (NAP9)                            | 3.00E-156 |
| T2-L2 | blue | Csa3G154410 | 2.05  | 1.63E-10    | Not assigned                 | unknown                                                       |           |
| T2-L2 | blue | Csa3G183950 | 2.092 | 0.0004285   | Abiotic stress               | Heat shock protein 83                                         | 0.00E+00  |
| T2-L2 | blue | Csa2G296090 | 2.143 | 2.44E-04    | Not assigned                 | unknown                                                       |           |
| T2-L2 | blue | Csa7G291720 | 2.169 | 0.006566    | Lipid metabolism             | Choline kinase                                                | 4.00E-133 |
| T2-L2 | blue | Csa2G427310 | 2.238 | 0.007581    | Transcription factor         | MYB domain protein 73 (MYB73)                                 | 1.00E-88  |
| T2-L2 | blue | Csa3G881750 | 2.24  | 0.009561    | Lipid metabolism             | PR5-like receptor kinase (PR5K)                               | 4.00E-154 |
| T2-L2 | blue | Csa5G589260 | 2.243 | 0           | Amino acid metabolism        | O-acetylserine(thiol) lyase (OAS-TL)                          | 4.00E-162 |
| T2-L2 | blue | Csa3G733350 | 2.317 | 0.00004435  | Cell organization            | RHO guanyl-nucleotide exchange factor 11 (ROPGEF11)           | 9.00E-41  |
| T2-L2 | blue | Csa2G004690 | 2.522 | 0.000004593 | Transcription factor         | Heat shock transcription factor C1 (HSFC1)                    | 5.00E-67  |
| T2-L2 | blue | Csa7G387690 | 2.631 | 0.000001654 | Transport                    | Sulfate transporter 3;1 (SULTR 3;1)                           | 3.00E-307 |
| T2-L2 | blue | Csa1G008520 | 2.771 | 0.00804     | Transport                    | Plasma membrane proton ATPase 4 (HA4)                         | 0.00E+00  |
| T2-L2 | blue | Csa6G514850 | 3.048 | 0.00009803  | Miscellaneous                | Cytochrome P450 family 77 subfamily B polypeptide 1 (CYP77B1) | 1.00E-241 |
| T2-L2 | blue | Csa5G604150 | 3.14  | 0.01        | Redox                        | Thioredoxin 2 (TRX2)                                          |           |
| T2-L2 | blue | Csa5G223070 | 3.216 | 0.003151    | Transcription factor         | WRKY DNA-binding protein 54 (WRKY54)                          | 3.00E-96  |
| T2-L2 | blue | Csa2G359890 | 3.289 | 3.70E-03    | Not assigned                 | unknown                                                       |           |
| T2-L2 | blue | Csa1G596520 | 3.4   | 0.0002165   | Protein degradation          | Cystein proteinases superfamily protein                       | 2.00E-168 |
| T2-L2 | blue | Csa7G395800 | 3.415 | 0.001823    | Miscellaneous                | Glutathione S-transferase phi 8 (GSTF8)                       | 3.00E-82  |
| T2-L2 | blue | Csa3G119700 | 3.575 | 0.00005376  | Transcription factor         | WRKY DNA-binding protein 53 (WRKY53)                          | 1.00E-102 |
| T2-L2 | blue | Csa6G381850 | 3.831 | 0.001156    | Transport                    | Amino acid permease 3 (AAP3)                                  | 2.00E-234 |
| T2-L2 | blue | Csa1G033160 | 4.495 | 0.006049    | Miscellaneous                | Glutathione S-transferase tau 9 (GSTU9)                       | 3.00E-68  |
| T2-L2 | blue | Csa6G486960 | 4.496 | 0.000002502 | Transcription factor         | WRKY DNA-binding protein 51 (WRKY51)                          | 1.00E-36  |
| T2-L2 | blue | Csa2G058620 | 5.345 | 0.003945    | Abiotic stress               | DNAJ heat shock N-terminal domain-containing protein          | 2.00E-137 |

Supplementary Table 1 (Continued)

|       |      |             |       |             |                              |                                                               |           |
|-------|------|-------------|-------|-------------|------------------------------|---------------------------------------------------------------|-----------|
| T2-L2 | blue | Csa1G574970 | 1.827 | 1.18E-05    | Major CHO metabolism         | Hexokinase 2 (HXK2)                                           | 7.00E-51  |
| T2-L2 | blue | Csa4G618520 | 1.837 | 0.0001765   | Biodegradation of xenobiotic | UDP glycosyltransferase (UGT)                                 | 1.00E-132 |
| T2-L2 | blue | Csa2G003610 | 1.841 | 0.0003098   | Lipid metabolism             | Abnormal inflorescence meristem (AIM1)                        | 3.00E-294 |
| T2-L2 | blue | Csa3G730930 | 1.847 | 0.00004243  | Transport                    | Ammonium transporter 2 (AMT2)                                 | 8E-220    |
| T2-L2 | blue | Csa6G493850 | 1.86  | 1.50E-05    | Not assigned                 | unknown                                                       |           |
| T2-L2 | blue | Csa3G159420 | 1.871 | 1.61E-03    | Not assigned                 | unknown                                                       |           |
| T2-L2 | blue | Csa1G528610 | 1.874 | 0.00435     | Lipid metabolism             | Thylakoid membrane anion transporter 1 (ANTR1)                | 7.00E-236 |
| T2-L2 | blue | Csa1G181360 | 1.875 | 0.001947    | Transport                    | non-intrinsic ABC protein 9 (NAP9)                            | 3.00E-156 |
| T2-L2 | blue | Csa3G154410 | 2.05  | 1.63E-10    | Not assigned                 | unknown                                                       |           |
| T2-L2 | blue | Csa3G183950 | 2.092 | 0.0004285   | Abiotic stress               | Heat shock protein 83                                         | 0.00E+00  |
| T2-L2 | blue | Csa2G296090 | 2.143 | 2.44E-04    | Not assigned                 | unknown                                                       |           |
| T2-L2 | blue | Csa7G291720 | 2.169 | 0.006566    | Lipid metabolism             | Choline kinase                                                | 4.00E-133 |
| T2-L2 | blue | Csa2G427310 | 2.238 | 0.007581    | Transcription factor         | MYB domain protein 73 (MYB73)                                 | 1.00E-88  |
| T2-L2 | blue | Csa3G881750 | 2.24  | 0.009561    | Lipid metabolism             | PR5-like receptor kinase (PR5K)                               | 4.00E-154 |
| T2-L2 | blue | Csa5G589260 | 2.243 | 0           | Amino acid metabolism        | O-acetylserine(thiol) lyase (OAS-TL)                          | 4.00E-162 |
| T2-L2 | blue | Csa3G733350 | 2.317 | 0.00004435  | Cell organization            | RHO guanyl-nucleotide exchange factor 11 (ROPGEF11)           | 9.00E-41  |
| T2-L2 | blue | Csa2G004690 | 2.522 | 0.000004593 | Transcription factor         | Heat shock transcription factor C1 (HSFC1)                    | 5.00E-67  |
| T2-L2 | blue | Csa7G387690 | 2.631 | 0.000001654 | Transport                    | Sulfate transporter 3;1 (SULTR 3;1)                           | 3.00E-307 |
| T2-L2 | blue | Csa1G008520 | 2.771 | 0.00804     | Transport                    | Plasma membrane proton ATPase 4 (HA4)                         | 0.00E+00  |
| T2-L2 | blue | Csa6G514850 | 3.048 | 0.00009803  | Miscellaneous                | Cytochrome P450 family 77 subfamily B polypeptide 1 (CYP77B1) | 1.00E-241 |
| T2-L2 | blue | Csa5G604150 | 3.14  | 0.01        | Redox                        | Thioredoxin 2 (TRX2)                                          |           |
| T2-L2 | blue | Csa5G223070 | 3.216 | 0.003151    | Transcription factor         | WRKY DNA-binding protein 54 (WRKY54)                          | 3.00E-96  |
| T2-L2 | blue | Csa2G359890 | 3.289 | 3.70E-03    | Not assigned                 | unknown                                                       |           |
| T2-L2 | blue | Csa1G596520 | 3.4   | 0.0002165   | Protein degradation          | Cystein proteinases superfamily protein                       | 2.00E-168 |
| T2-L2 | blue | Csa7G395800 | 3.415 | 0.001823    | Miscellaneous                | Glutathione S-transferase phi 8 (GSTF8)                       | 3.00E-82  |
| T2-L2 | blue | Csa3G119700 | 3.575 | 0.00005376  | Transcription factor         | WRKY DNA-binding protein 53 (WRKY53)                          | 1.00E-102 |
| T2-L2 | blue | Csa6G381850 | 3.831 | 0.001156    | Transport                    | Amino acid permease 3 (AAP3)                                  | 2.00E-234 |
| T2-L2 | blue | Csa1G033160 | 4.495 | 0.006049    | Miscellaneous                | Glutathione S-transferase tau 9 (GSTU9)                       | 3.00E-68  |
| T2-L2 | blue | Csa6G486960 | 4.496 | 0.000002502 | Transcription factor         | WRKY DNA-binding protein 51 (WRKY51)                          | 1.00E-36  |
| T2-L2 | blue | Csa2G058620 | 5.345 | 0.003945    | Abiotic stress               | DNAJ heat shock N-terminal domain-containing protein          | 2.00E-137 |

Supplementary Table 1 (Continued)

|       |      |             |       |             |                              |                                                               |           |
|-------|------|-------------|-------|-------------|------------------------------|---------------------------------------------------------------|-----------|
| T2-L2 | blue | Csa1G574970 | 1.827 | 1.18E-05    | Major CHO metabolism         | Hexokinase 2 (HXK2)                                           | 7.00E-51  |
| T2-L2 | blue | Csa4G618520 | 1.837 | 0.0001765   | Biodegradation of xenobiotic | UDP glycosyltransferase (UGT)                                 | 1.00E-132 |
| T2-L2 | blue | Csa2G003610 | 1.841 | 0.0003098   | Lipid metabolism             | Abnormal inflorescence meristem (AIM1)                        | 3.00E-294 |
| T2-L2 | blue | Csa3G730930 | 1.847 | 0.00004243  | Transport                    | Ammonium transporter 2 (AMT2)                                 | 8E-220    |
| T2-L2 | blue | Csa6G493850 | 1.86  | 1.50E-05    | Not assigned                 | unknown                                                       |           |
| T2-L2 | blue | Csa3G159420 | 1.871 | 1.61E-03    | Not assigned                 | unknown                                                       |           |
| T2-L2 | blue | Csa1G528610 | 1.874 | 0.00435     | Lipid metabolism             | Thylakoid membrane anion transporter 1 (ANTR1)                | 7.00E-236 |
| T2-L2 | blue | Csa1G181360 | 1.875 | 0.001947    | Transport                    | non-intrinsic ABC protein 9 (NAP9)                            | 3.00E-156 |
| T2-L2 | blue | Csa3G154410 | 2.05  | 1.63E-10    | Not assigned                 | unknown                                                       |           |
| T2-L2 | blue | Csa3G183950 | 2.092 | 0.0004285   | Abiotic stress               | Heat shock protein 83                                         | 0.00E+00  |
| T2-L2 | blue | Csa2G296090 | 2.143 | 2.44E-04    | Not assigned                 | unknown                                                       |           |
| T2-L2 | blue | Csa7G291720 | 2.169 | 0.006566    | Lipid metabolism             | Choline kinase                                                | 4.00E-133 |
| T2-L2 | blue | Csa2G427310 | 2.238 | 0.007581    | Transcription factor         | MYB domain protein 73 (MYB73)                                 | 1.00E-88  |
| T2-L2 | blue | Csa3G881750 | 2.24  | 0.009561    | Lipid metabolism             | PR5-like receptor kinase (PR5K)                               | 4.00E-154 |
| T2-L2 | blue | Csa5G589260 | 2.243 | 0           | Amino acid metabolism        | O-acetylserine(thiol) lyase (OAS-TL)                          | 4.00E-162 |
| T2-L2 | blue | Csa3G733350 | 2.317 | 0.00004435  | Cell organization            | RHO guanyl-nucleotide exchange factor 11 (ROPGEF11)           | 9.00E-41  |
| T2-L2 | blue | Csa2G004690 | 2.522 | 0.000004593 | Transcription factor         | Heat shock transcription factor C1 (HSFC1)                    | 5.00E-67  |
| T2-L2 | blue | Csa7G387690 | 2.631 | 0.000001654 | Transport                    | Sulfate transporter 3;1 (SULTR 3;1)                           | 3.00E-307 |
| T2-L2 | blue | Csa1G008520 | 2.771 | 0.00804     | Transport                    | Plasma membrane proton ATPase 4 (HA4)                         | 0.00E+00  |
| T2-L2 | blue | Csa6G514850 | 3.048 | 0.00009803  | Miscellaneous                | Cytochrome P450 family 77 subfamily B polypeptide 1 (CYP77B1) | 1.00E-241 |
| T2-L2 | blue | Csa5G604150 | 3.14  | 0.01        | Redox                        | Thioredoxin 2 (TRX2)                                          |           |
| T2-L2 | blue | Csa5G223070 | 3.216 | 0.003151    | Transcription factor         | WRKY DNA-binding protein 54 (WRKY54)                          | 3.00E-96  |
| T2-L2 | blue | Csa2G359890 | 3.289 | 3.70E-03    | Not assigned                 | unknown                                                       |           |
| T2-L2 | blue | Csa1G596520 | 3.4   | 0.0002165   | Protein degradation          | Cystein proteinases superfamily protein                       | 2.00E-168 |
| T2-L2 | blue | Csa7G395800 | 3.415 | 0.001823    | Miscellaneous                | Glutathione S-transferase phi 8 (GSTF8)                       | 3.00E-82  |
| T2-L2 | blue | Csa3G119700 | 3.575 | 0.00005376  | Transcription factor         | WRKY DNA-binding protein 53 (WRKY53)                          | 1.00E-102 |
| T2-L2 | blue | Csa6G381850 | 3.831 | 0.001156    | Transport                    | Amino acid permease 3 (AAP3)                                  | 2.00E-234 |
| T2-L2 | blue | Csa1G033160 | 4.495 | 0.006049    | Miscellaneous                | Glutathione S-transferase tau 9 (GSTU9)                       | 3.00E-68  |
| T2-L2 | blue | Csa6G486960 | 4.496 | 0.000002502 | Transcription factor         | WRKY DNA-binding protein 51 (WRKY51)                          | 1.00E-36  |
| T2-L2 | blue | Csa2G058620 | 5.345 | 0.003945    | Abiotic stress               | DNAJ heat shock N-terminal domain-containing protein          | 2.00E-137 |



Supplementary Table 1 (Continued)

|       |      |             |       |             |                              |                                                               |           |
|-------|------|-------------|-------|-------------|------------------------------|---------------------------------------------------------------|-----------|
| T2-L2 | blue | Csa1G574970 | 1.827 | 1.18E-05    | Major CHO metabolism         | Hexokinase 2 (HXK2)                                           | 7.00E-51  |
| T2-L2 | blue | Csa4G618520 | 1.837 | 0.0001765   | Biodegradation of xenobiotic | UDP glycosyltransferase (UGT)                                 | 1.00E-132 |
| T2-L2 | blue | Csa2G003610 | 1.841 | 0.0003098   | Lipid metabolism             | Abnormal inflorescence meristem (AIM1)                        | 3.00E-294 |
| T2-L2 | blue | Csa3G730930 | 1.847 | 0.00004243  | Transport                    | Ammonium transporter 2 (AMT2)                                 | 8E-220    |
| T2-L2 | blue | Csa6G493850 | 1.86  | 1.50E-05    | Not assigned                 | unknown                                                       |           |
| T2-L2 | blue | Csa3G159420 | 1.871 | 1.61E-03    | Not assigned                 | unknown                                                       |           |
| T2-L2 | blue | Csa1G528610 | 1.874 | 0.00435     | Lipid metabolism             | Thylakoid membrane anion transporter 1 (ANTR1)                | 7.00E-236 |
| T2-L2 | blue | Csa1G181360 | 1.875 | 0.001947    | Transport                    | non-intrinsic ABC protein 9 (NAP9)                            | 3.00E-156 |
| T2-L2 | blue | Csa3G154410 | 2.05  | 1.63E-10    | Not assigned                 | unknown                                                       |           |
| T2-L2 | blue | Csa3G183950 | 2.092 | 0.0004285   | Abiotic stress               | Heat shock protein 83                                         | 0.00E+00  |
| T2-L2 | blue | Csa2G296090 | 2.143 | 2.44E-04    | Not assigned                 | unknown                                                       |           |
| T2-L2 | blue | Csa7G291720 | 2.169 | 0.006566    | Lipid metabolism             | Choline kinase                                                | 4.00E-133 |
| T2-L2 | blue | Csa2G427310 | 2.238 | 0.007581    | Transcription factor         | MYB domain protein 73 (MYB73)                                 | 1.00E-88  |
| T2-L2 | blue | Csa3G881750 | 2.24  | 0.009561    | Lipid metabolism             | PR5-like receptor kinase (PR5K)                               | 4.00E-154 |
| T2-L2 | blue | Csa5G589260 | 2.243 | 0           | Amino acid metabolism        | O-acetylserine(thiol) lyase (OAS-TL)                          | 4.00E-162 |
| T2-L2 | blue | Csa3G733350 | 2.317 | 0.00004435  | Cell organization            | RHO guanyl-nucleotide exchange factor 11 (ROPGEF11)           | 9.00E-41  |
| T2-L2 | blue | Csa2G004690 | 2.522 | 0.000004593 | Transcription factor         | Heat shock transcription factor C1 (HSFC1)                    | 5.00E-67  |
| T2-L2 | blue | Csa7G387690 | 2.631 | 0.000001654 | Transport                    | Sulfate transporter 3;1 (SULTR 3;1)                           | 3.00E-307 |
| T2-L2 | blue | Csa1G008520 | 2.771 | 0.00804     | Transport                    | Plasma membrane proton ATPase 4 (HA4)                         | 0.00E+00  |
| T2-L2 | blue | Csa6G514850 | 3.048 | 0.00009803  | Miscellaneous                | Cytochrome P450 family 77 subfamily B polypeptide 1 (CYP77B1) | 1.00E-241 |
| T2-L2 | blue | Csa5G604150 | 3.14  | 0.01        | Redox                        | Thioredoxin 2 (TRX2)                                          |           |
| T2-L2 | blue | Csa5G223070 | 3.216 | 0.003151    | Transcription factor         | WRKY DNA-binding protein 54 (WRKY54)                          | 3.00E-96  |
| T2-L2 | blue | Csa2G359890 | 3.289 | 3.70E-03    | Not assigned                 | unknown                                                       |           |
| T2-L2 | blue | Csa1G596520 | 3.4   | 0.0002165   | Protein degradation          | Cystein proteinases superfamily protein                       | 2.00E-168 |
| T2-L2 | blue | Csa7G395800 | 3.415 | 0.001823    | Miscellaneous                | Glutathione S-transferase phi 8 (GSTF8)                       | 3.00E-82  |
| T2-L2 | blue | Csa3G119700 | 3.575 | 0.00005376  | Transcription factor         | WRKY DNA-binding protein 53 (WRKY53)                          | 1.00E-102 |
| T2-L2 | blue | Csa6G381850 | 3.831 | 0.001156    | Transport                    | Amino acid permease 3 (AAP3)                                  | 2.00E-234 |
| T2-L2 | blue | Csa1G033160 | 4.495 | 0.006049    | Miscellaneous                | Glutathione S-transferase tau 9 (GSTU9)                       | 3.00E-68  |
| T2-L2 | blue | Csa6G486960 | 4.496 | 0.000002502 | Transcription factor         | WRKY DNA-binding protein 51 (WRKY51)                          | 1.00E-36  |
| T2-L2 | blue | Csa2G058620 | 5.345 | 0.003945    | Abiotic stress               | DNAJ heat shock N-terminal domain-containing protein          | 2.00E-137 |

Supplementary Table 1 (Continued)

|       |      |             |       |             |                              |                                                               |           |
|-------|------|-------------|-------|-------------|------------------------------|---------------------------------------------------------------|-----------|
| T2-L2 | blue | Csa1G574970 | 1.827 | 1.18E-05    | Major CHO metabolism         | Hexokinase 2 (HXK2)                                           | 7.00E-51  |
| T2-L2 | blue | Csa4G618520 | 1.837 | 0.0001765   | Biodegradation of xenobiotic | UDP glycosyltransferase (UGT)                                 | 1.00E-132 |
| T2-L2 | blue | Csa2G003610 | 1.841 | 0.0003098   | Lipid metabolism             | Abnormal inflorescence meristem (AIM1)                        | 3.00E-294 |
| T2-L2 | blue | Csa3G730930 | 1.847 | 0.00004243  | Transport                    | Ammonium transporter 2 (AMT2)                                 | 8E-220    |
| T2-L2 | blue | Csa6G493850 | 1.86  | 1.50E-05    | Not assigned                 | unknown                                                       |           |
| T2-L2 | blue | Csa3G159420 | 1.871 | 1.61E-03    | Not assigned                 | unknown                                                       |           |
| T2-L2 | blue | Csa1G528610 | 1.874 | 0.00435     | Lipid metabolism             | Thylakoid membrane anion transporter 1 (ANTR1)                | 7.00E-236 |
| T2-L2 | blue | Csa1G181360 | 1.875 | 0.001947    | Transport                    | non-intrinsic ABC protein 9 (NAP9)                            | 3.00E-156 |
| T2-L2 | blue | Csa3G154410 | 2.05  | 1.63E-10    | Not assigned                 | unknown                                                       |           |
| T2-L2 | blue | Csa3G183950 | 2.092 | 0.0004285   | Abiotic stress               | Heat shock protein 83                                         | 0.00E+00  |
| T2-L2 | blue | Csa2G296090 | 2.143 | 2.44E-04    | Not assigned                 | unknown                                                       |           |
| T2-L2 | blue | Csa7G291720 | 2.169 | 0.006566    | Lipid metabolism             | Choline kinase                                                | 4.00E-133 |
| T2-L2 | blue | Csa2G427310 | 2.238 | 0.007581    | Transcription factor         | MYB domain protein 73 (MYB73)                                 | 1.00E-88  |
| T2-L2 | blue | Csa3G881750 | 2.24  | 0.009561    | Lipid metabolism             | PR5-like receptor kinase (PR5K)                               | 4.00E-154 |
| T2-L2 | blue | Csa5G589260 | 2.243 | 0           | Amino acid metabolism        | O-acetylserine(thiol) lyase (OAS-TL)                          | 4.00E-162 |
| T2-L2 | blue | Csa3G733350 | 2.317 | 0.00004435  | Cell organization            | RHO guanyl-nucleotide exchange factor 11 (ROPGEF11)           | 9.00E-41  |
| T2-L2 | blue | Csa2G004690 | 2.522 | 0.000004593 | Transcription factor         | Heat shock transcription factor C1 (HSFC1)                    | 5.00E-67  |
| T2-L2 | blue | Csa7G387690 | 2.631 | 0.000001654 | Transport                    | Sulfate transporter 3;1 (SULTR 3;1)                           | 3.00E-307 |
| T2-L2 | blue | Csa1G008520 | 2.771 | 0.00804     | Transport                    | Plasma membrane proton ATPase 4 (HA4)                         | 0.00E+00  |
| T2-L2 | blue | Csa6G514850 | 3.048 | 0.00009803  | Miscellaneous                | Cytochrome P450 family 77 subfamily B polypeptide 1 (CYP77B1) | 1.00E-241 |
| T2-L2 | blue | Csa5G604150 | 3.14  | 0.01        | Redox                        | Thioredoxin 2 (TRX2)                                          |           |
| T2-L2 | blue | Csa5G223070 | 3.216 | 0.003151    | Transcription factor         | WRKY DNA-binding protein 54 (WRKY54)                          | 3.00E-96  |
| T2-L2 | blue | Csa2G359890 | 3.289 | 3.70E-03    | Not assigned                 | unknown                                                       |           |
| T2-L2 | blue | Csa1G596520 | 3.4   | 0.0002165   | Protein degradation          | Cystein proteinases superfamily protein                       | 2.00E-168 |
| T2-L2 | blue | Csa7G395800 | 3.415 | 0.001823    | Miscellaneous                | Glutathione S-transferase phi 8 (GSTF8)                       | 3.00E-82  |
| T2-L2 | blue | Csa3G119700 | 3.575 | 0.00005376  | Transcription factor         | WRKY DNA-binding protein 53 (WRKY53)                          | 1.00E-102 |
| T2-L2 | blue | Csa6G381850 | 3.831 | 0.001156    | Transport                    | Amino acid permease 3 (AAP3)                                  | 2.00E-234 |
| T2-L2 | blue | Csa1G033160 | 4.495 | 0.006049    | Miscellaneous                | Glutathione S-transferase tau 9 (GSTU9)                       | 3.00E-68  |
| T2-L2 | blue | Csa6G486960 | 4.496 | 0.000002502 | Transcription factor         | WRKY DNA-binding protein 51 (WRKY51)                          | 1.00E-36  |
| T2-L2 | blue | Csa2G058620 | 5.345 | 0.003945    | Abiotic stress               | DNAJ heat shock N-terminal domain-containing protein          | 2.00E-137 |

Supplementary Table 1 (Continued)

|       |      |             |       |             |                              |                                                               |           |
|-------|------|-------------|-------|-------------|------------------------------|---------------------------------------------------------------|-----------|
| T2-L2 | blue | Csa1G574970 | 1.827 | 1.18E-05    | Major CHO metabolism         | Hexokinase 2 (HXK2)                                           | 7.00E-51  |
| T2-L2 | blue | Csa4G618520 | 1.837 | 0.0001765   | Biodegradation of xenobiotic | UDP glycosyltransferase (UGT)                                 | 1.00E-132 |
| T2-L2 | blue | Csa2G003610 | 1.841 | 0.0003098   | Lipid metabolism             | Abnormal inflorescence meristem (AIM1)                        | 3.00E-294 |
| T2-L2 | blue | Csa3G730930 | 1.847 | 0.00004243  | Transport                    | Ammonium transporter 2 (AMT2)                                 | 8E-220    |
| T2-L2 | blue | Csa6G493850 | 1.86  | 1.50E-05    | Not assigned                 | unknown                                                       |           |
| T2-L2 | blue | Csa3G159420 | 1.871 | 1.61E-03    | Not assigned                 | unknown                                                       |           |
| T2-L2 | blue | Csa1G528610 | 1.874 | 0.00435     | Lipid metabolism             | Thylakoid membrane anion transporter 1 (ANTR1)                | 7.00E-236 |
| T2-L2 | blue | Csa1G181360 | 1.875 | 0.001947    | Transport                    | non-intrinsic ABC protein 9 (NAP9)                            | 3.00E-156 |
| T2-L2 | blue | Csa3G154410 | 2.05  | 1.63E-10    | Not assigned                 | unknown                                                       |           |
| T2-L2 | blue | Csa3G183950 | 2.092 | 0.0004285   | Abiotic stress               | Heat shock protein 83                                         | 0.00E+00  |
| T2-L2 | blue | Csa2G296090 | 2.143 | 2.44E-04    | Not assigned                 | unknown                                                       |           |
| T2-L2 | blue | Csa7G291720 | 2.169 | 0.006566    | Lipid metabolism             | Choline kinase                                                | 4.00E-133 |
| T2-L2 | blue | Csa2G427310 | 2.238 | 0.007581    | Transcription factor         | MYB domain protein 73 (MYB73)                                 | 1.00E-88  |
| T2-L2 | blue | Csa3G881750 | 2.24  | 0.009561    | Lipid metabolism             | PR5-like receptor kinase (PR5K)                               | 4.00E-154 |
| T2-L2 | blue | Csa5G589260 | 2.243 | 0           | Amino acid metabolism        | O-acetylserine(thiol) lyase (OAS-TL)                          | 4.00E-162 |
| T2-L2 | blue | Csa3G733350 | 2.317 | 0.00004435  | Cell organization            | RHO guanyl-nucleotide exchange factor 11 (ROPGEF11)           | 9.00E-41  |
| T2-L2 | blue | Csa2G004690 | 2.522 | 0.000004593 | Transcription factor         | Heat shock transcription factor C1 (HSFC1)                    | 5.00E-67  |
| T2-L2 | blue | Csa7G387690 | 2.631 | 0.000001654 | Transport                    | Sulfate transporter 3;1 (SULTR 3;1)                           | 3.00E-307 |
| T2-L2 | blue | Csa1G008520 | 2.771 | 0.00804     | Transport                    | Plasma membrane proton ATPase 4 (HA4)                         | 0.00E+00  |
| T2-L2 | blue | Csa6G514850 | 3.048 | 0.00009803  | Miscellaneous                | Cytochrome P450 family 77 subfamily B polypeptide 1 (CYP77B1) | 1.00E-241 |
| T2-L2 | blue | Csa5G604150 | 3.14  | 0.01        | Redox                        | Thioredoxin 2 (TRX2)                                          |           |
| T2-L2 | blue | Csa5G223070 | 3.216 | 0.003151    | Transcription factor         | WRKY DNA-binding protein 54 (WRKY54)                          | 3.00E-96  |
| T2-L2 | blue | Csa2G359890 | 3.289 | 3.70E-03    | Not assigned                 | unknown                                                       |           |
| T2-L2 | blue | Csa1G596520 | 3.4   | 0.0002165   | Protein degradation          | Cystein proteinases superfamily protein                       | 2.00E-168 |
| T2-L2 | blue | Csa7G395800 | 3.415 | 0.001823    | Miscellaneous                | Glutathione S-transferase phi 8 (GSTF8)                       | 3.00E-82  |
| T2-L2 | blue | Csa3G119700 | 3.575 | 0.00005376  | Transcription factor         | WRKY DNA-binding protein 53 (WRKY53)                          | 1.00E-102 |
| T2-L2 | blue | Csa6G381850 | 3.831 | 0.001156    | Transport                    | Amino acid permease 3 (AAP3)                                  | 2.00E-234 |
| T2-L2 | blue | Csa1G033160 | 4.495 | 0.006049    | Miscellaneous                | Glutathione S-transferase tau 9 (GSTU9)                       | 3.00E-68  |
| T2-L2 | blue | Csa6G486960 | 4.496 | 0.000002502 | Transcription factor         | WRKY DNA-binding protein 51 (WRKY51)                          | 1.00E-36  |
| T2-L2 | blue | Csa2G058620 | 5.345 | 0.003945    | Abiotic stress               | DNAJ heat shock N-terminal domain-containing protein          | 2.00E-137 |

Supplementary Table 1 (Continued)

|       |      |             |       |             |                              |                                                               |           |
|-------|------|-------------|-------|-------------|------------------------------|---------------------------------------------------------------|-----------|
| T2-L2 | blue | Csa1G574970 | 1.827 | 1.18E-05    | Major CHO metabolism         | Hexokinase 2 (HXK2)                                           | 7.00E-51  |
| T2-L2 | blue | Csa4G618520 | 1.837 | 0.0001765   | Biodegradation of xenobiotic | UDP glycosyltransferase (UGT)                                 | 1.00E-132 |
| T2-L2 | blue | Csa2G003610 | 1.841 | 0.0003098   | Lipid metabolism             | Abnormal inflorescence meristem (AIM1)                        | 3.00E-294 |
| T2-L2 | blue | Csa3G730930 | 1.847 | 0.00004243  | Transport                    | Ammonium transporter 2 (AMT2)                                 | 8E-220    |
| T2-L2 | blue | Csa6G493850 | 1.86  | 1.50E-05    | Not assigned                 | unknown                                                       |           |
| T2-L2 | blue | Csa3G159420 | 1.871 | 1.61E-03    | Not assigned                 | unknown                                                       |           |
| T2-L2 | blue | Csa1G528610 | 1.874 | 0.00435     | Lipid metabolism             | Thylakoid membrane anion transporter 1 (ANTR1)                | 7.00E-236 |
| T2-L2 | blue | Csa1G181360 | 1.875 | 0.001947    | Transport                    | non-intrinsic ABC protein 9 (NAP9)                            | 3.00E-156 |
| T2-L2 | blue | Csa3G154410 | 2.05  | 1.63E-10    | Not assigned                 | unknown                                                       |           |
| T2-L2 | blue | Csa3G183950 | 2.092 | 0.0004285   | Abiotic stress               | Heat shock protein 83                                         | 0.00E+00  |
| T2-L2 | blue | Csa2G296090 | 2.143 | 2.44E-04    | Not assigned                 | unknown                                                       |           |
| T2-L2 | blue | Csa7G291720 | 2.169 | 0.006566    | Lipid metabolism             | Choline kinase                                                | 4.00E-133 |
| T2-L2 | blue | Csa2G427310 | 2.238 | 0.007581    | Transcription factor         | MYB domain protein 73 (MYB73)                                 | 1.00E-88  |
| T2-L2 | blue | Csa3G881750 | 2.24  | 0.009561    | Lipid metabolism             | PR5-like receptor kinase (PR5K)                               | 4.00E-154 |
| T2-L2 | blue | Csa5G589260 | 2.243 | 0           | Amino acid metabolism        | O-acetylserine(thiol) lyase (OAS-TL)                          | 4.00E-162 |
| T2-L2 | blue | Csa3G733350 | 2.317 | 0.00004435  | Cell organization            | RHO guanyl-nucleotide exchange factor 11 (ROPGEF11)           | 9.00E-41  |
| T2-L2 | blue | Csa2G004690 | 2.522 | 0.000004593 | Transcription factor         | Heat shock transcription factor C1 (HSFC1)                    | 5.00E-67  |
| T2-L2 | blue | Csa7G387690 | 2.631 | 0.000001654 | Transport                    | Sulfate transporter 3;1 (SULTR 3;1)                           | 3.00E-307 |
| T2-L2 | blue | Csa1G008520 | 2.771 | 0.00804     | Transport                    | Plasma membrane proton ATPase 4 (HA4)                         | 0.00E+00  |
| T2-L2 | blue | Csa6G514850 | 3.048 | 0.00009803  | Miscellaneous                | Cytochrome P450 family 77 subfamily B polypeptide 1 (CYP77B1) | 1.00E-241 |
| T2-L2 | blue | Csa5G604150 | 3.14  | 0.01        | Redox                        | Thioredoxin 2 (TRX2)                                          |           |
| T2-L2 | blue | Csa5G223070 | 3.216 | 0.003151    | Transcription factor         | WRKY DNA-binding protein 54 (WRKY54)                          | 3.00E-96  |
| T2-L2 | blue | Csa2G359890 | 3.289 | 3.70E-03    | Not assigned                 | unknown                                                       |           |
| T2-L2 | blue | Csa1G596520 | 3.4   | 0.0002165   | Protein degradation          | Cystein proteinases superfamily protein                       | 2.00E-168 |
| T2-L2 | blue | Csa7G395800 | 3.415 | 0.001823    | Miscellaneous                | Glutathione S-transferase phi 8 (GSTF8)                       | 3.00E-82  |
| T2-L2 | blue | Csa3G119700 | 3.575 | 0.00005376  | Transcription factor         | WRKY DNA-binding protein 53 (WRKY53)                          | 1.00E-102 |
| T2-L2 | blue | Csa6G381850 | 3.831 | 0.001156    | Transport                    | Amino acid permease 3 (AAP3)                                  | 2.00E-234 |
| T2-L2 | blue | Csa1G033160 | 4.495 | 0.006049    | Miscellaneous                | Glutathione S-transferase tau 9 (GSTU9)                       | 3.00E-68  |
| T2-L2 | blue | Csa6G486960 | 4.496 | 0.000002502 | Transcription factor         | WRKY DNA-binding protein 51 (WRKY51)                          | 1.00E-36  |
| T2-L2 | blue | Csa2G058620 | 5.345 | 0.003945    | Abiotic stress               | DNAJ heat shock N-terminal domain-containing protein          | 2.00E-137 |

Supplementary Table 1 (Continued)

|       |      |             |       |             |                              |                                                               |           |
|-------|------|-------------|-------|-------------|------------------------------|---------------------------------------------------------------|-----------|
| T2-L2 | blue | Csa1G574970 | 1.827 | 1.18E-05    | Major CHO metabolism         | Hexokinase 2 (HXK2)                                           | 7.00E-51  |
| T2-L2 | blue | Csa4G618520 | 1.837 | 0.0001765   | Biodegradation of xenobiotic | UDP glycosyltransferase (UGT)                                 | 1.00E-132 |
| T2-L2 | blue | Csa2G003610 | 1.841 | 0.0003098   | Lipid metabolism             | Abnormal inflorescence meristem (AIM1)                        | 3.00E-294 |
| T2-L2 | blue | Csa3G730930 | 1.847 | 0.00004243  | Transport                    | Ammonium transporter 2 (AMT2)                                 | 8E-220    |
| T2-L2 | blue | Csa6G493850 | 1.86  | 1.50E-05    | Not assigned                 | unknown                                                       |           |
| T2-L2 | blue | Csa3G159420 | 1.871 | 1.61E-03    | Not assigned                 | unknown                                                       |           |
| T2-L2 | blue | Csa1G528610 | 1.874 | 0.00435     | Lipid metabolism             | Thylakoid membrane anion transporter 1 (ANTR1)                | 7.00E-236 |
| T2-L2 | blue | Csa1G181360 | 1.875 | 0.001947    | Transport                    | non-intrinsic ABC protein 9 (NAP9)                            | 3.00E-156 |
| T2-L2 | blue | Csa3G154410 | 2.05  | 1.63E-10    | Not assigned                 | unknown                                                       |           |
| T2-L2 | blue | Csa3G183950 | 2.092 | 0.0004285   | Abiotic stress               | Heat shock protein 83                                         | 0.00E+00  |
| T2-L2 | blue | Csa2G296090 | 2.143 | 2.44E-04    | Not assigned                 | unknown                                                       |           |
| T2-L2 | blue | Csa7G291720 | 2.169 | 0.006566    | Lipid metabolism             | Choline kinase                                                | 4.00E-133 |
| T2-L2 | blue | Csa2G427310 | 2.238 | 0.007581    | Transcription factor         | MYB domain protein 73 (MYB73)                                 | 1.00E-88  |
| T2-L2 | blue | Csa3G881750 | 2.24  | 0.009561    | Lipid metabolism             | PR5-like receptor kinase (PR5K)                               | 4.00E-154 |
| T2-L2 | blue | Csa5G589260 | 2.243 | 0           | Amino acid metabolism        | O-acetylserine(thiol) lyase (OAS-TL)                          | 4.00E-162 |
| T2-L2 | blue | Csa3G733350 | 2.317 | 0.00004435  | Cell organization            | RHO guanyl-nucleotide exchange factor 11 (ROPGEF11)           | 9.00E-41  |
| T2-L2 | blue | Csa2G004690 | 2.522 | 0.000004593 | Transcription factor         | Heat shock transcription factor C1 (HSFC1)                    | 5.00E-67  |
| T2-L2 | blue | Csa7G387690 | 2.631 | 0.000001654 | Transport                    | Sulfate transporter 3;1 (SULTR 3;1)                           | 3.00E-307 |
| T2-L2 | blue | Csa1G008520 | 2.771 | 0.00804     | Transport                    | Plasma membrane proton ATPase 4 (HA4)                         | 0.00E+00  |
| T2-L2 | blue | Csa6G514850 | 3.048 | 0.00009803  | Miscellaneous                | Cytochrome P450 family 77 subfamily B polypeptide 1 (CYP77B1) | 1.00E-241 |
| T2-L2 | blue | Csa5G604150 | 3.14  | 0.01        | Redox                        | Thioredoxin 2 (TRX2)                                          |           |
| T2-L2 | blue | Csa5G223070 | 3.216 | 0.003151    | Transcription factor         | WRKY DNA-binding protein 54 (WRKY54)                          | 3.00E-96  |
| T2-L2 | blue | Csa2G359890 | 3.289 | 3.70E-03    | Not assigned                 | unknown                                                       |           |
| T2-L2 | blue | Csa1G596520 | 3.4   | 0.0002165   | Protein degradation          | Cystein proteinases superfamily protein                       | 2.00E-168 |
| T2-L2 | blue | Csa7G395800 | 3.415 | 0.001823    | Miscellaneous                | Glutathione S-transferase phi 8 (GSTF8)                       | 3.00E-82  |
| T2-L2 | blue | Csa3G119700 | 3.575 | 0.00005376  | Transcription factor         | WRKY DNA-binding protein 53 (WRKY53)                          | 1.00E-102 |
| T2-L2 | blue | Csa6G381850 | 3.831 | 0.001156    | Transport                    | Amino acid permease 3 (AAP3)                                  | 2.00E-234 |
| T2-L2 | blue | Csa1G033160 | 4.495 | 0.006049    | Miscellaneous                | Glutathione S-transferase tau 9 (GSTU9)                       | 3.00E-68  |
| T2-L2 | blue | Csa6G486960 | 4.496 | 0.000002502 | Transcription factor         | WRKY DNA-binding protein 51 (WRKY51)                          | 1.00E-36  |
| T2-L2 | blue | Csa2G058620 | 5.345 | 0.003945    | Abiotic stress               | DNAJ heat shock N-terminal domain-containing protein          | 2.00E-137 |

Supplementary Table 1 (Continued)

|       |      |             |       |             |                              |                                                               |           |
|-------|------|-------------|-------|-------------|------------------------------|---------------------------------------------------------------|-----------|
| T2-L2 | blue | Csa1G574970 | 1.827 | 1.18E-05    | Major CHO metabolism         | Hexokinase 2 (HXK2)                                           | 7.00E-51  |
| T2-L2 | blue | Csa4G618520 | 1.837 | 0.0001765   | Biodegradation of xenobiotic | UDP glycosyltransferase (UGT)                                 | 1.00E-132 |
| T2-L2 | blue | Csa2G003610 | 1.841 | 0.0003098   | Lipid metabolism             | Abnormal inflorescence meristem (AIM1)                        | 3.00E-294 |
| T2-L2 | blue | Csa3G730930 | 1.847 | 0.00004243  | Transport                    | Ammonium transporter 2 (AMT2)                                 | 8E-220    |
| T2-L2 | blue | Csa6G493850 | 1.86  | 1.50E-05    | Not assigned                 | unknown                                                       |           |
| T2-L2 | blue | Csa3G159420 | 1.871 | 1.61E-03    | Not assigned                 | unknown                                                       |           |
| T2-L2 | blue | Csa1G528610 | 1.874 | 0.00435     | Lipid metabolism             | Thylakoid membrane anion transporter 1 (ANTR1)                | 7.00E-236 |
| T2-L2 | blue | Csa1G181360 | 1.875 | 0.001947    | Transport                    | non-intrinsic ABC protein 9 (NAP9)                            | 3.00E-156 |
| T2-L2 | blue | Csa3G154410 | 2.05  | 1.63E-10    | Not assigned                 | unknown                                                       |           |
| T2-L2 | blue | Csa3G183950 | 2.092 | 0.0004285   | Abiotic stress               | Heat shock protein 83                                         | 0.00E+00  |
| T2-L2 | blue | Csa2G296090 | 2.143 | 2.44E-04    | Not assigned                 | unknown                                                       |           |
| T2-L2 | blue | Csa7G291720 | 2.169 | 0.006566    | Lipid metabolism             | Choline kinase                                                | 4.00E-133 |
| T2-L2 | blue | Csa2G427310 | 2.238 | 0.007581    | Transcription factor         | MYB domain protein 73 (MYB73)                                 | 1.00E-88  |
| T2-L2 | blue | Csa3G881750 | 2.24  | 0.009561    | Lipid metabolism             | PR5-like receptor kinase (PR5K)                               | 4.00E-154 |
| T2-L2 | blue | Csa5G589260 | 2.243 | 0           | Amino acid metabolism        | O-acetylserine(thiol) lyase (OAS-TL)                          | 4.00E-162 |
| T2-L2 | blue | Csa3G733350 | 2.317 | 0.00004435  | Cell organization            | RHO guanyl-nucleotide exchange factor 11 (ROPGEF11)           | 9.00E-41  |
| T2-L2 | blue | Csa2G004690 | 2.522 | 0.000004593 | Transcription factor         | Heat shock transcription factor C1 (HSFC1)                    | 5.00E-67  |
| T2-L2 | blue | Csa7G387690 | 2.631 | 0.000001654 | Transport                    | Sulfate transporter 3;1 (SULTR 3;1)                           | 3.00E-307 |
| T2-L2 | blue | Csa1G008520 | 2.771 | 0.00804     | Transport                    | Plasma membrane proton ATPase 4 (HA4)                         | 0.00E+00  |
| T2-L2 | blue | Csa6G514850 | 3.048 | 0.00009803  | Miscellaneous                | Cytochrome P450 family 77 subfamily B polypeptide 1 (CYP77B1) | 1.00E-241 |
| T2-L2 | blue | Csa5G604150 | 3.14  | 0.01        | Redox                        | Thioredoxin 2 (TRX2)                                          |           |
| T2-L2 | blue | Csa5G223070 | 3.216 | 0.003151    | Transcription factor         | WRKY DNA-binding protein 54 (WRKY54)                          | 3.00E-96  |
| T2-L2 | blue | Csa2G359890 | 3.289 | 3.70E-03    | Not assigned                 | unknown                                                       |           |
| T2-L2 | blue | Csa1G596520 | 3.4   | 0.0002165   | Protein degradation          | Cystein proteinases superfamily protein                       | 2.00E-168 |
| T2-L2 | blue | Csa7G395800 | 3.415 | 0.001823    | Miscellaneous                | Glutathione S-transferase phi 8 (GSTF8)                       | 3.00E-82  |
| T2-L2 | blue | Csa3G119700 | 3.575 | 0.00005376  | Transcription factor         | WRKY DNA-binding protein 53 (WRKY53)                          | 1.00E-102 |
| T2-L2 | blue | Csa6G381850 | 3.831 | 0.001156    | Transport                    | Amino acid permease 3 (AAP3)                                  | 2.00E-234 |
| T2-L2 | blue | Csa1G033160 | 4.495 | 0.006049    | Miscellaneous                | Glutathione S-transferase tau 9 (GSTU9)                       | 3.00E-68  |
| T2-L2 | blue | Csa6G486960 | 4.496 | 0.000002502 | Transcription factor         | WRKY DNA-binding protein 51 (WRKY51)                          | 1.00E-36  |
| T2-L2 | blue | Csa2G058620 | 5.345 | 0.003945    | Abiotic stress               | DNAJ heat shock N-terminal domain-containing protein          | 2.00E-137 |

Supplementary Table 1 (Continued)

|       |      |             |       |             |                              |                                                               |           |
|-------|------|-------------|-------|-------------|------------------------------|---------------------------------------------------------------|-----------|
| T2-L2 | blue | Csa1G574970 | 1.827 | 1.18E-05    | Major CHO metabolism         | Hexokinase 2 (HXK2)                                           | 7.00E-51  |
| T2-L2 | blue | Csa4G618520 | 1.837 | 0.0001765   | Biodegradation of xenobiotic | UDP glycosyltransferase (UGT)                                 | 1.00E-132 |
| T2-L2 | blue | Csa2G003610 | 1.841 | 0.0003098   | Lipid metabolism             | Abnormal inflorescence meristem (AIM1)                        | 3.00E-294 |
| T2-L2 | blue | Csa3G730930 | 1.847 | 0.00004243  | Transport                    | Ammonium transporter 2 (AMT2)                                 | 8E-220    |
| T2-L2 | blue | Csa6G493850 | 1.86  | 1.50E-05    | Not assigned                 | unknown                                                       |           |
| T2-L2 | blue | Csa3G159420 | 1.871 | 1.61E-03    | Not assigned                 | unknown                                                       |           |
| T2-L2 | blue | Csa1G528610 | 1.874 | 0.00435     | Lipid metabolism             | Thylakoid membrane anion transporter 1 (ANTR1)                | 7.00E-236 |
| T2-L2 | blue | Csa1G181360 | 1.875 | 0.001947    | Transport                    | non-intrinsic ABC protein 9 (NAP9)                            | 3.00E-156 |
| T2-L2 | blue | Csa3G154410 | 2.05  | 1.63E-10    | Not assigned                 | unknown                                                       |           |
| T2-L2 | blue | Csa3G183950 | 2.092 | 0.0004285   | Abiotic stress               | Heat shock protein 83                                         | 0.00E+00  |
| T2-L2 | blue | Csa2G296090 | 2.143 | 2.44E-04    | Not assigned                 | unknown                                                       |           |
| T2-L2 | blue | Csa7G291720 | 2.169 | 0.006566    | Lipid metabolism             | Choline kinase                                                | 4.00E-133 |
| T2-L2 | blue | Csa2G427310 | 2.238 | 0.007581    | Transcription factor         | MYB domain protein 73 (MYB73)                                 | 1.00E-88  |
| T2-L2 | blue | Csa3G881750 | 2.24  | 0.009561    | Lipid metabolism             | PR5-like receptor kinase (PR5K)                               | 4.00E-154 |
| T2-L2 | blue | Csa5G589260 | 2.243 | 0           | Amino acid metabolism        | O-acetylserine(thiol) lyase (OAS-TL)                          | 4.00E-162 |
| T2-L2 | blue | Csa3G733350 | 2.317 | 0.00004435  | Cell organization            | RHO guanyl-nucleotide exchange factor 11 (ROPGEF11)           | 9.00E-41  |
| T2-L2 | blue | Csa2G004690 | 2.522 | 0.000004593 | Transcription factor         | Heat shock transcription factor C1 (HSFC1)                    | 5.00E-67  |
| T2-L2 | blue | Csa7G387690 | 2.631 | 0.000001654 | Transport                    | Sulfate transporter 3;1 (SULTR 3;1)                           | 3.00E-307 |
| T2-L2 | blue | Csa1G008520 | 2.771 | 0.00804     | Transport                    | Plasma membrane proton ATPase 4 (HA4)                         | 0.00E+00  |
| T2-L2 | blue | Csa6G514850 | 3.048 | 0.00009803  | Miscellaneous                | Cytochrome P450 family 77 subfamily B polypeptide 1 (CYP77B1) | 1.00E-241 |
| T2-L2 | blue | Csa5G604150 | 3.14  | 0.01        | Redox                        | Thioredoxin 2 (TRX2)                                          |           |
| T2-L2 | blue | Csa5G223070 | 3.216 | 0.003151    | Transcription factor         | WRKY DNA-binding protein 54 (WRKY54)                          | 3.00E-96  |
| T2-L2 | blue | Csa2G359890 | 3.289 | 3.70E-03    | Not assigned                 | unknown                                                       |           |
| T2-L2 | blue | Csa1G596520 | 3.4   | 0.0002165   | Protein degradation          | Cystein proteinases superfamily protein                       | 2.00E-168 |
| T2-L2 | blue | Csa7G395800 | 3.415 | 0.001823    | Miscellaneous                | Glutathione S-transferase phi 8 (GSTF8)                       | 3.00E-82  |
| T2-L2 | blue | Csa3G119700 | 3.575 | 0.00005376  | Transcription factor         | WRKY DNA-binding protein 53 (WRKY53)                          | 1.00E-102 |
| T2-L2 | blue | Csa6G381850 | 3.831 | 0.001156    | Transport                    | Amino acid permease 3 (AAP3)                                  | 2.00E-234 |
| T2-L2 | blue | Csa1G033160 | 4.495 | 0.006049    | Miscellaneous                | Glutathione S-transferase tau 9 (GSTU9)                       | 3.00E-68  |
| T2-L2 | blue | Csa6G486960 | 4.496 | 0.000002502 | Transcription factor         | WRKY DNA-binding protein 51 (WRKY51)                          | 1.00E-36  |
| T2-L2 | blue | Csa2G058620 | 5.345 | 0.003945    | Abiotic stress               | DNAJ heat shock N-terminal domain-containing protein          | 2.00E-137 |

Supplementary Table 1 (Continued)

|       |      |             |       |             |                              |                                                               |           |
|-------|------|-------------|-------|-------------|------------------------------|---------------------------------------------------------------|-----------|
| T2-L2 | blue | Csa1G574970 | 1.827 | 1.18E-05    | Major CHO metabolism         | Hexokinase 2 (HXK2)                                           | 7.00E-51  |
| T2-L2 | blue | Csa4G618520 | 1.837 | 0.0001765   | Biodegradation of xenobiotic | UDP glycosyltransferase (UGT)                                 | 1.00E-132 |
| T2-L2 | blue | Csa2G003610 | 1.841 | 0.0003098   | Lipid metabolism             | Abnormal inflorescence meristem (AIM1)                        | 3.00E-294 |
| T2-L2 | blue | Csa3G730930 | 1.847 | 0.00004243  | Transport                    | Ammonium transporter 2 (AMT2)                                 | 8E-220    |
| T2-L2 | blue | Csa6G493850 | 1.86  | 1.50E-05    | Not assigned                 | unknown                                                       |           |
| T2-L2 | blue | Csa3G159420 | 1.871 | 1.61E-03    | Not assigned                 | unknown                                                       |           |
| T2-L2 | blue | Csa1G528610 | 1.874 | 0.00435     | Lipid metabolism             | Thylakoid membrane anion transporter 1 (ANTR1)                | 7.00E-236 |
| T2-L2 | blue | Csa1G181360 | 1.875 | 0.001947    | Transport                    | non-intrinsic ABC protein 9 (NAP9)                            | 3.00E-156 |
| T2-L2 | blue | Csa3G154410 | 2.05  | 1.63E-10    | Not assigned                 | unknown                                                       |           |
| T2-L2 | blue | Csa3G183950 | 2.092 | 0.0004285   | Abiotic stress               | Heat shock protein 83                                         | 0.00E+00  |
| T2-L2 | blue | Csa2G296090 | 2.143 | 2.44E-04    | Not assigned                 | unknown                                                       |           |
| T2-L2 | blue | Csa7G291720 | 2.169 | 0.006566    | Lipid metabolism             | Choline kinase                                                | 4.00E-133 |
| T2-L2 | blue | Csa2G427310 | 2.238 | 0.007581    | Transcription factor         | MYB domain protein 73 (MYB73)                                 | 1.00E-88  |
| T2-L2 | blue | Csa3G881750 | 2.24  | 0.009561    | Lipid metabolism             | PR5-like receptor kinase (PR5K)                               | 4.00E-154 |
| T2-L2 | blue | Csa5G589260 | 2.243 | 0           | Amino acid metabolism        | O-acetylserine(thiol) lyase (OAS-TL)                          | 4.00E-162 |
| T2-L2 | blue | Csa3G733350 | 2.317 | 0.00004435  | Cell organization            | RHO guanyl-nucleotide exchange factor 11 (ROPGEF11)           | 9.00E-41  |
| T2-L2 | blue | Csa2G004690 | 2.522 | 0.000004593 | Transcription factor         | Heat shock transcription factor C1 (HSFC1)                    | 5.00E-67  |
| T2-L2 | blue | Csa7G387690 | 2.631 | 0.000001654 | Transport                    | Sulfate transporter 3;1 (SULTR 3;1)                           | 3.00E-307 |
| T2-L2 | blue | Csa1G008520 | 2.771 | 0.00804     | Transport                    | Plasma membrane proton ATPase 4 (HA4)                         | 0.00E+00  |
| T2-L2 | blue | Csa6G514850 | 3.048 | 0.00009803  | Miscellaneous                | Cytochrome P450 family 77 subfamily B polypeptide 1 (CYP77B1) | 1.00E-241 |
| T2-L2 | blue | Csa5G604150 | 3.14  | 0.01        | Redox                        | Thioredoxin 2 (TRX2)                                          |           |
| T2-L2 | blue | Csa5G223070 | 3.216 | 0.003151    | Transcription factor         | WRKY DNA-binding protein 54 (WRKY54)                          | 3.00E-96  |
| T2-L2 | blue | Csa2G359890 | 3.289 | 3.70E-03    | Not assigned                 | unknown                                                       |           |
| T2-L2 | blue | Csa1G596520 | 3.4   | 0.0002165   | Protein degradation          | Cystein proteinases superfamily protein                       | 2.00E-168 |
| T2-L2 | blue | Csa7G395800 | 3.415 | 0.001823    | Miscellaneous                | Glutathione S-transferase phi 8 (GSTF8)                       | 3.00E-82  |
| T2-L2 | blue | Csa3G119700 | 3.575 | 0.00005376  | Transcription factor         | WRKY DNA-binding protein 53 (WRKY53)                          | 1.00E-102 |
| T2-L2 | blue | Csa6G381850 | 3.831 | 0.001156    | Transport                    | Amino acid permease 3 (AAP3)                                  | 2.00E-234 |
| T2-L2 | blue | Csa1G033160 | 4.495 | 0.006049    | Miscellaneous                | Glutathione S-transferase tau 9 (GSTU9)                       | 3.00E-68  |
| T2-L2 | blue | Csa6G486960 | 4.496 | 0.000002502 | Transcription factor         | WRKY DNA-binding protein 51 (WRKY51)                          | 1.00E-36  |
| T2-L2 | blue | Csa2G058620 | 5.345 | 0.003945    | Abiotic stress               | DNAJ heat shock N-terminal domain-containing protein          | 2.00E-137 |



Supplementary Table 1 (Continued)

|       |      |             |       |             |                              |                                                               |           |
|-------|------|-------------|-------|-------------|------------------------------|---------------------------------------------------------------|-----------|
| T2-L2 | blue | Csa1G574970 | 1.827 | 1.18E-05    | Major CHO metabolism         | Hexokinase 2 (HXK2)                                           | 7.00E-51  |
| T2-L2 | blue | Csa4G618520 | 1.837 | 0.0001765   | Biodegradation of xenobiotic | UDP glycosyltransferase (UGT)                                 | 1.00E-132 |
| T2-L2 | blue | Csa2G003610 | 1.841 | 0.0003098   | Lipid metabolism             | Abnormal inflorescence meristem (AIM1)                        | 3.00E-294 |
| T2-L2 | blue | Csa3G730930 | 1.847 | 0.00004243  | Transport                    | Ammonium transporter 2 (AMT2)                                 | 8E-220    |
| T2-L2 | blue | Csa6G493850 | 1.86  | 1.50E-05    | Not assigned                 | unknown                                                       |           |
| T2-L2 | blue | Csa3G159420 | 1.871 | 1.61E-03    | Not assigned                 | unknown                                                       |           |
| T2-L2 | blue | Csa1G528610 | 1.874 | 0.00435     | Lipid metabolism             | Thylakoid membrane anion transporter 1 (ANTR1)                | 7.00E-236 |
| T2-L2 | blue | Csa1G181360 | 1.875 | 0.001947    | Transport                    | non-intrinsic ABC protein 9 (NAP9)                            | 3.00E-156 |
| T2-L2 | blue | Csa3G154410 | 2.05  | 1.63E-10    | Not assigned                 | unknown                                                       |           |
| T2-L2 | blue | Csa3G183950 | 2.092 | 0.0004285   | Abiotic stress               | Heat shock protein 83                                         | 0.00E+00  |
| T2-L2 | blue | Csa2G296090 | 2.143 | 2.44E-04    | Not assigned                 | unknown                                                       |           |
| T2-L2 | blue | Csa7G291720 | 2.169 | 0.006566    | Lipid metabolism             | Choline kinase                                                | 4.00E-133 |
| T2-L2 | blue | Csa2G427310 | 2.238 | 0.007581    | Transcription factor         | MYB domain protein 73 (MYB73)                                 | 1.00E-88  |
| T2-L2 | blue | Csa3G881750 | 2.24  | 0.009561    | Lipid metabolism             | PR5-like receptor kinase (PR5K)                               | 4.00E-154 |
| T2-L2 | blue | Csa5G589260 | 2.243 | 0           | Amino acid metabolism        | O-acetylserine(thiol) lyase (OAS-TL)                          | 4.00E-162 |
| T2-L2 | blue | Csa3G733350 | 2.317 | 0.00004435  | Cell organization            | RHO guanyl-nucleotide exchange factor 11 (ROPGEF11)           | 9.00E-41  |
| T2-L2 | blue | Csa2G004690 | 2.522 | 0.000004593 | Transcription factor         | Heat shock transcription factor C1 (HSFC1)                    | 5.00E-67  |
| T2-L2 | blue | Csa7G387690 | 2.631 | 0.000001654 | Transport                    | Sulfate transporter 3;1 (SULTR 3;1)                           | 3.00E-307 |
| T2-L2 | blue | Csa1G008520 | 2.771 | 0.00804     | Transport                    | Plasma membrane proton ATPase 4 (HA4)                         | 0.00E+00  |
| T2-L2 | blue | Csa6G514850 | 3.048 | 0.00009803  | Miscellaneous                | Cytochrome P450 family 77 subfamily B polypeptide 1 (CYP77B1) | 1.00E-241 |
| T2-L2 | blue | Csa5G604150 | 3.14  | 0.01        | Redox                        | Thioredoxin 2 (TRX2)                                          |           |
| T2-L2 | blue | Csa5G223070 | 3.216 | 0.003151    | Transcription factor         | WRKY DNA-binding protein 54 (WRKY54)                          | 3.00E-96  |
| T2-L2 | blue | Csa2G359890 | 3.289 | 3.70E-03    | Not assigned                 | unknown                                                       |           |
| T2-L2 | blue | Csa1G596520 | 3.4   | 0.0002165   | Protein degradation          | Cystein proteinases superfamily protein                       | 2.00E-168 |
| T2-L2 | blue | Csa7G395800 | 3.415 | 0.001823    | Miscellaneous                | Glutathione S-transferase phi 8 (GSTF8)                       | 3.00E-82  |
| T2-L2 | blue | Csa3G119700 | 3.575 | 0.00005376  | Transcription factor         | WRKY DNA-binding protein 53 (WRKY53)                          | 1.00E-102 |
| T2-L2 | blue | Csa6G381850 | 3.831 | 0.001156    | Transport                    | Amino acid permease 3 (AAP3)                                  | 2.00E-234 |
| T2-L2 | blue | Csa1G033160 | 4.495 | 0.006049    | Miscellaneous                | Glutathione S-transferase tau 9 (GSTU9)                       | 3.00E-68  |
| T2-L2 | blue | Csa6G486960 | 4.496 | 0.000002502 | Transcription factor         | WRKY DNA-binding protein 51 (WRKY51)                          | 1.00E-36  |
| T2-L2 | blue | Csa2G058620 | 5.345 | 0.003945    | Abiotic stress               | DNAJ heat shock N-terminal domain-containing protein          | 2.00E-137 |

Supplementary Table 1 (Continued)

|       |      |             |       |             |                              |                                                               |           |
|-------|------|-------------|-------|-------------|------------------------------|---------------------------------------------------------------|-----------|
| T2-L2 | blue | Csa1G574970 | 1.827 | 1.18E-05    | Major CHO metabolism         | Hexokinase 2 (HXK2)                                           | 7.00E-51  |
| T2-L2 | blue | Csa4G618520 | 1.837 | 0.0001765   | Biodegradation of xenobiotic | UDP glycosyltransferase (UGT)                                 | 1.00E-132 |
| T2-L2 | blue | Csa2G003610 | 1.841 | 0.0003098   | Lipid metabolism             | Abnormal inflorescence meristem (AIM1)                        | 3.00E-294 |
| T2-L2 | blue | Csa3G730930 | 1.847 | 0.00004243  | Transport                    | Ammonium transporter 2 (AMT2)                                 | 8E-220    |
| T2-L2 | blue | Csa6G493850 | 1.86  | 1.50E-05    | Not assigned                 | unknown                                                       |           |
| T2-L2 | blue | Csa3G159420 | 1.871 | 1.61E-03    | Not assigned                 | unknown                                                       |           |
| T2-L2 | blue | Csa1G528610 | 1.874 | 0.00435     | Lipid metabolism             | Thylakoid membrane anion transporter 1 (ANTR1)                | 7.00E-236 |
| T2-L2 | blue | Csa1G181360 | 1.875 | 0.001947    | Transport                    | non-intrinsic ABC protein 9 (NAP9)                            | 3.00E-156 |
| T2-L2 | blue | Csa3G154410 | 2.05  | 1.63E-10    | Not assigned                 | unknown                                                       |           |
| T2-L2 | blue | Csa3G183950 | 2.092 | 0.0004285   | Abiotic stress               | Heat shock protein 83                                         | 0.00E+00  |
| T2-L2 | blue | Csa2G296090 | 2.143 | 2.44E-04    | Not assigned                 | unknown                                                       |           |
| T2-L2 | blue | Csa7G291720 | 2.169 | 0.006566    | Lipid metabolism             | Choline kinase                                                | 4.00E-133 |
| T2-L2 | blue | Csa2G427310 | 2.238 | 0.007581    | Transcription factor         | MYB domain protein 73 (MYB73)                                 | 1.00E-88  |
| T2-L2 | blue | Csa3G881750 | 2.24  | 0.009561    | Lipid metabolism             | PR5-like receptor kinase (PR5K)                               | 4.00E-154 |
| T2-L2 | blue | Csa5G589260 | 2.243 | 0           | Amino acid metabolism        | O-acetylserine(thiol) lyase (OAS-TL)                          | 4.00E-162 |
| T2-L2 | blue | Csa3G733350 | 2.317 | 0.00004435  | Cell organization            | RHO guanyl-nucleotide exchange factor 11 (ROPGEF11)           | 9.00E-41  |
| T2-L2 | blue | Csa2G004690 | 2.522 | 0.000004593 | Transcription factor         | Heat shock transcription factor C1 (HSFC1)                    | 5.00E-67  |
| T2-L2 | blue | Csa7G387690 | 2.631 | 0.000001654 | Transport                    | Sulfate transporter 3;1 (SULTR 3;1)                           | 3.00E-307 |
| T2-L2 | blue | Csa1G008520 | 2.771 | 0.00804     | Transport                    | Plasma membrane proton ATPase 4 (HA4)                         | 0.00E+00  |
| T2-L2 | blue | Csa6G514850 | 3.048 | 0.00009803  | Miscellaneous                | Cytochrome P450 family 77 subfamily B polypeptide 1 (CYP77B1) | 1.00E-241 |
| T2-L2 | blue | Csa5G604150 | 3.14  | 0.01        | Redox                        | Thioredoxin 2 (TRX2)                                          |           |
| T2-L2 | blue | Csa5G223070 | 3.216 | 0.003151    | Transcription factor         | WRKY DNA-binding protein 54 (WRKY54)                          | 3.00E-96  |
| T2-L2 | blue | Csa2G359890 | 3.289 | 3.70E-03    | Not assigned                 | unknown                                                       |           |
| T2-L2 | blue | Csa1G596520 | 3.4   | 0.0002165   | Protein degradation          | Cystein proteinases superfamily protein                       | 2.00E-168 |
| T2-L2 | blue | Csa7G395800 | 3.415 | 0.001823    | Miscellaneous                | Glutathione S-transferase phi 8 (GSTF8)                       | 3.00E-82  |
| T2-L2 | blue | Csa3G119700 | 3.575 | 0.00005376  | Transcription factor         | WRKY DNA-binding protein 53 (WRKY53)                          | 1.00E-102 |
| T2-L2 | blue | Csa6G381850 | 3.831 | 0.001156    | Transport                    | Amino acid permease 3 (AAP3)                                  | 2.00E-234 |
| T2-L2 | blue | Csa1G033160 | 4.495 | 0.006049    | Miscellaneous                | Glutathione S-transferase tau 9 (GSTU9)                       | 3.00E-68  |
| T2-L2 | blue | Csa6G486960 | 4.496 | 0.000002502 | Transcription factor         | WRKY DNA-binding protein 51 (WRKY51)                          | 1.00E-36  |
| T2-L2 | blue | Csa2G058620 | 5.345 | 0.003945    | Abiotic stress               | DNAJ heat shock N-terminal domain-containing protein          | 2.00E-137 |

Supplementary Table 1 (Continued)

|       |      |             |       |             |                              |                                                               |           |
|-------|------|-------------|-------|-------------|------------------------------|---------------------------------------------------------------|-----------|
| T2-L2 | blue | Csa1G574970 | 1.827 | 1.18E-05    | Major CHO metabolism         | Hexokinase 2 (HXK2)                                           | 7.00E-51  |
| T2-L2 | blue | Csa4G618520 | 1.837 | 0.0001765   | Biodegradation of xenobiotic | UDP glycosyltransferase (UGT)                                 | 1.00E-132 |
| T2-L2 | blue | Csa2G003610 | 1.841 | 0.0003098   | Lipid metabolism             | Abnormal inflorescence meristem (AIM1)                        | 3.00E-294 |
| T2-L2 | blue | Csa3G730930 | 1.847 | 0.00004243  | Transport                    | Ammonium transporter 2 (AMT2)                                 | 8E-220    |
| T2-L2 | blue | Csa6G493850 | 1.86  | 1.50E-05    | Not assigned                 | unknown                                                       |           |
| T2-L2 | blue | Csa3G159420 | 1.871 | 1.61E-03    | Not assigned                 | unknown                                                       |           |
| T2-L2 | blue | Csa1G528610 | 1.874 | 0.00435     | Lipid metabolism             | Thylakoid membrane anion transporter 1 (ANTR1)                | 7.00E-236 |
| T2-L2 | blue | Csa1G181360 | 1.875 | 0.001947    | Transport                    | non-intrinsic ABC protein 9 (NAP9)                            | 3.00E-156 |
| T2-L2 | blue | Csa3G154410 | 2.05  | 1.63E-10    | Not assigned                 | unknown                                                       |           |
| T2-L2 | blue | Csa3G183950 | 2.092 | 0.0004285   | Abiotic stress               | Heat shock protein 83                                         | 0.00E+00  |
| T2-L2 | blue | Csa2G296090 | 2.143 | 2.44E-04    | Not assigned                 | unknown                                                       |           |
| T2-L2 | blue | Csa7G291720 | 2.169 | 0.006566    | Lipid metabolism             | Choline kinase                                                | 4.00E-133 |
| T2-L2 | blue | Csa2G427310 | 2.238 | 0.007581    | Transcription factor         | MYB domain protein 73 (MYB73)                                 | 1.00E-88  |
| T2-L2 | blue | Csa3G881750 | 2.24  | 0.009561    | Lipid metabolism             | PR5-like receptor kinase (PR5K)                               | 4.00E-154 |
| T2-L2 | blue | Csa5G589260 | 2.243 | 0           | Amino acid metabolism        | O-acetylserine(thiol) lyase (OAS-TL)                          | 4.00E-162 |
| T2-L2 | blue | Csa3G733350 | 2.317 | 0.00004435  | Cell organization            | RHO guanyl-nucleotide exchange factor 11 (ROPGEF11)           | 9.00E-41  |
| T2-L2 | blue | Csa2G004690 | 2.522 | 0.000004593 | Transcription factor         | Heat shock transcription factor C1 (HSFC1)                    | 5.00E-67  |
| T2-L2 | blue | Csa7G387690 | 2.631 | 0.000001654 | Transport                    | Sulfate transporter 3;1 (SULTR 3;1)                           | 3.00E-307 |
| T2-L2 | blue | Csa1G008520 | 2.771 | 0.00804     | Transport                    | Plasma membrane proton ATPase 4 (HA4)                         | 0.00E+00  |
| T2-L2 | blue | Csa6G514850 | 3.048 | 0.00009803  | Miscellaneous                | Cytochrome P450 family 77 subfamily B polypeptide 1 (CYP77B1) | 1.00E-241 |
| T2-L2 | blue | Csa5G604150 | 3.14  | 0.01        | Redox                        | Thioredoxin 2 (TRX2)                                          |           |
| T2-L2 | blue | Csa5G223070 | 3.216 | 0.003151    | Transcription factor         | WRKY DNA-binding protein 54 (WRKY54)                          | 3.00E-96  |
| T2-L2 | blue | Csa2G359890 | 3.289 | 3.70E-03    | Not assigned                 | unknown                                                       |           |
| T2-L2 | blue | Csa1G596520 | 3.4   | 0.0002165   | Protein degradation          | Cystein proteinases superfamily protein                       | 2.00E-168 |
| T2-L2 | blue | Csa7G395800 | 3.415 | 0.001823    | Miscellaneous                | Glutathione S-transferase phi 8 (GSTF8)                       | 3.00E-82  |
| T2-L2 | blue | Csa3G119700 | 3.575 | 0.00005376  | Transcription factor         | WRKY DNA-binding protein 53 (WRKY53)                          | 1.00E-102 |
| T2-L2 | blue | Csa6G381850 | 3.831 | 0.001156    | Transport                    | Amino acid permease 3 (AAP3)                                  | 2.00E-234 |
| T2-L2 | blue | Csa1G033160 | 4.495 | 0.006049    | Miscellaneous                | Glutathione S-transferase tau 9 (GSTU9)                       | 3.00E-68  |
| T2-L2 | blue | Csa6G486960 | 4.496 | 0.000002502 | Transcription factor         | WRKY DNA-binding protein 51 (WRKY51)                          | 1.00E-36  |
| T2-L2 | blue | Csa2G058620 | 5.345 | 0.003945    | Abiotic stress               | DNAJ heat shock N-terminal domain-containing protein          | 2.00E-137 |

Supplementary Table 1 (Continued)

|       |      |             |       |             |                              |                                                               |           |
|-------|------|-------------|-------|-------------|------------------------------|---------------------------------------------------------------|-----------|
| T2-L2 | blue | Csa1G574970 | 1.827 | 1.18E-05    | Major CHO metabolism         | Hexokinase 2 (HXK2)                                           | 7.00E-51  |
| T2-L2 | blue | Csa4G618520 | 1.837 | 0.0001765   | Biodegradation of xenobiotic | UDP glycosyltransferase (UGT)                                 | 1.00E-132 |
| T2-L2 | blue | Csa2G003610 | 1.841 | 0.0003098   | Lipid metabolism             | Abnormal inflorescence meristem (AIM1)                        | 3.00E-294 |
| T2-L2 | blue | Csa3G730930 | 1.847 | 0.00004243  | Transport                    | Ammonium transporter 2 (AMT2)                                 | 8E-220    |
| T2-L2 | blue | Csa6G493850 | 1.86  | 1.50E-05    | Not assigned                 | unknown                                                       |           |
| T2-L2 | blue | Csa3G159420 | 1.871 | 1.61E-03    | Not assigned                 | unknown                                                       |           |
| T2-L2 | blue | Csa1G528610 | 1.874 | 0.00435     | Lipid metabolism             | Thylakoid membrane anion transporter 1 (ANTR1)                | 7.00E-236 |
| T2-L2 | blue | Csa1G181360 | 1.875 | 0.001947    | Transport                    | non-intrinsic ABC protein 9 (NAP9)                            | 3.00E-156 |
| T2-L2 | blue | Csa3G154410 | 2.05  | 1.63E-10    | Not assigned                 | unknown                                                       |           |
| T2-L2 | blue | Csa3G183950 | 2.092 | 0.0004285   | Abiotic stress               | Heat shock protein 83                                         | 0.00E+00  |
| T2-L2 | blue | Csa2G296090 | 2.143 | 2.44E-04    | Not assigned                 | unknown                                                       |           |
| T2-L2 | blue | Csa7G291720 | 2.169 | 0.006566    | Lipid metabolism             | Choline kinase                                                | 4.00E-133 |
| T2-L2 | blue | Csa2G427310 | 2.238 | 0.007581    | Transcription factor         | MYB domain protein 73 (MYB73)                                 | 1.00E-88  |
| T2-L2 | blue | Csa3G881750 | 2.24  | 0.009561    | Lipid metabolism             | PR5-like receptor kinase (PR5K)                               | 4.00E-154 |
| T2-L2 | blue | Csa5G589260 | 2.243 | 0           | Amino acid metabolism        | O-acetylserine(thiol) lyase (OAS-TL)                          | 4.00E-162 |
| T2-L2 | blue | Csa3G733350 | 2.317 | 0.00004435  | Cell organization            | RHO guanyl-nucleotide exchange factor 11 (ROPGEF11)           | 9.00E-41  |
| T2-L2 | blue | Csa2G004690 | 2.522 | 0.000004593 | Transcription factor         | Heat shock transcription factor C1 (HSFC1)                    | 5.00E-67  |
| T2-L2 | blue | Csa7G387690 | 2.631 | 0.000001654 | Transport                    | Sulfate transporter 3;1 (SULTR 3;1)                           | 3.00E-307 |
| T2-L2 | blue | Csa1G008520 | 2.771 | 0.00804     | Transport                    | Plasma membrane proton ATPase 4 (HA4)                         | 0.00E+00  |
| T2-L2 | blue | Csa6G514850 | 3.048 | 0.00009803  | Miscellaneous                | Cytochrome P450 family 77 subfamily B polypeptide 1 (CYP77B1) | 1.00E-241 |
| T2-L2 | blue | Csa5G604150 | 3.14  | 0.01        | Redox                        | Thioredoxin 2 (TRX2)                                          |           |
| T2-L2 | blue | Csa5G223070 | 3.216 | 0.003151    | Transcription factor         | WRKY DNA-binding protein 54 (WRKY54)                          | 3.00E-96  |
| T2-L2 | blue | Csa2G359890 | 3.289 | 3.70E-03    | Not assigned                 | unknown                                                       |           |
| T2-L2 | blue | Csa1G596520 | 3.4   | 0.0002165   | Protein degradation          | Cystein proteinases superfamily protein                       | 2.00E-168 |
| T2-L2 | blue | Csa7G395800 | 3.415 | 0.001823    | Miscellaneous                | Glutathione S-transferase phi 8 (GSTF8)                       | 3.00E-82  |
| T2-L2 | blue | Csa3G119700 | 3.575 | 0.00005376  | Transcription factor         | WRKY DNA-binding protein 53 (WRKY53)                          | 1.00E-102 |
| T2-L2 | blue | Csa6G381850 | 3.831 | 0.001156    | Transport                    | Amino acid permease 3 (AAP3)                                  | 2.00E-234 |
| T2-L2 | blue | Csa1G033160 | 4.495 | 0.006049    | Miscellaneous                | Glutathione S-transferase tau 9 (GSTU9)                       | 3.00E-68  |
| T2-L2 | blue | Csa6G486960 | 4.496 | 0.000002502 | Transcription factor         | WRKY DNA-binding protein 51 (WRKY51)                          | 1.00E-36  |
| T2-L2 | blue | Csa2G058620 | 5.345 | 0.003945    | Abiotic stress               | DNAJ heat shock N-terminal domain-containing protein          | 2.00E-137 |

Supplementary Table 1 (Continued)

|       |      |             |       |             |                              |                                                               |           |
|-------|------|-------------|-------|-------------|------------------------------|---------------------------------------------------------------|-----------|
| T2-L2 | blue | Csa1G574970 | 1.827 | 1.18E-05    | Major CHO metabolism         | Hexokinase 2 (HXK2)                                           | 7.00E-51  |
| T2-L2 | blue | Csa4G618520 | 1.837 | 0.0001765   | Biodegradation of xenobiotic | UDP glycosyltransferase (UGT)                                 | 1.00E-132 |
| T2-L2 | blue | Csa2G003610 | 1.841 | 0.0003098   | Lipid metabolism             | Abnormal inflorescence meristem (AIM1)                        | 3.00E-294 |
| T2-L2 | blue | Csa3G730930 | 1.847 | 0.00004243  | Transport                    | Ammonium transporter 2 (AMT2)                                 | 8E-220    |
| T2-L2 | blue | Csa6G493850 | 1.86  | 1.50E-05    | Not assigned                 | unknown                                                       |           |
| T2-L2 | blue | Csa3G159420 | 1.871 | 1.61E-03    | Not assigned                 | unknown                                                       |           |
| T2-L2 | blue | Csa1G528610 | 1.874 | 0.00435     | Lipid metabolism             | Thylakoid membrane anion transporter 1 (ANTR1)                | 7.00E-236 |
| T2-L2 | blue | Csa1G181360 | 1.875 | 0.001947    | Transport                    | non-intrinsic ABC protein 9 (NAP9)                            | 3.00E-156 |
| T2-L2 | blue | Csa3G154410 | 2.05  | 1.63E-10    | Not assigned                 | unknown                                                       |           |
| T2-L2 | blue | Csa3G183950 | 2.092 | 0.0004285   | Abiotic stress               | Heat shock protein 83                                         | 0.00E+00  |
| T2-L2 | blue | Csa2G296090 | 2.143 | 2.44E-04    | Not assigned                 | unknown                                                       |           |
| T2-L2 | blue | Csa7G291720 | 2.169 | 0.006566    | Lipid metabolism             | Choline kinase                                                | 4.00E-133 |
| T2-L2 | blue | Csa2G427310 | 2.238 | 0.007581    | Transcription factor         | MYB domain protein 73 (MYB73)                                 | 1.00E-88  |
| T2-L2 | blue | Csa3G881750 | 2.24  | 0.009561    | Lipid metabolism             | PR5-like receptor kinase (PR5K)                               | 4.00E-154 |
| T2-L2 | blue | Csa5G589260 | 2.243 | 0           | Amino acid metabolism        | O-acetylserine(thiol) lyase (OAS-TL)                          | 4.00E-162 |
| T2-L2 | blue | Csa3G733350 | 2.317 | 0.00004435  | Cell organization            | RHO guanyl-nucleotide exchange factor 11 (ROPGEF11)           | 9.00E-41  |
| T2-L2 | blue | Csa2G004690 | 2.522 | 0.000004593 | Transcription factor         | Heat shock transcription factor C1 (HSFC1)                    | 5.00E-67  |
| T2-L2 | blue | Csa7G387690 | 2.631 | 0.000001654 | Transport                    | Sulfate transporter 3;1 (SULTR 3;1)                           | 3.00E-307 |
| T2-L2 | blue | Csa1G008520 | 2.771 | 0.00804     | Transport                    | Plasma membrane proton ATPase 4 (HA4)                         | 0.00E+00  |
| T2-L2 | blue | Csa6G514850 | 3.048 | 0.00009803  | Miscellaneous                | Cytochrome P450 family 77 subfamily B polypeptide 1 (CYP77B1) | 1.00E-241 |
| T2-L2 | blue | Csa5G604150 | 3.14  | 0.01        | Redox                        | Thioredoxin 2 (TRX2)                                          |           |
| T2-L2 | blue | Csa5G223070 | 3.216 | 0.003151    | Transcription factor         | WRKY DNA-binding protein 54 (WRKY54)                          | 3.00E-96  |
| T2-L2 | blue | Csa2G359890 | 3.289 | 3.70E-03    | Not assigned                 | unknown                                                       |           |
| T2-L2 | blue | Csa1G596520 | 3.4   | 0.0002165   | Protein degradation          | Cystein proteinases superfamily protein                       | 2.00E-168 |
| T2-L2 | blue | Csa7G395800 | 3.415 | 0.001823    | Miscellaneous                | Glutathione S-transferase phi 8 (GSTF8)                       | 3.00E-82  |
| T2-L2 | blue | Csa3G119700 | 3.575 | 0.00005376  | Transcription factor         | WRKY DNA-binding protein 53 (WRKY53)                          | 1.00E-102 |
| T2-L2 | blue | Csa6G381850 | 3.831 | 0.001156    | Transport                    | Amino acid permease 3 (AAP3)                                  | 2.00E-234 |
| T2-L2 | blue | Csa1G033160 | 4.495 | 0.006049    | Miscellaneous                | Glutathione S-transferase tau 9 (GSTU9)                       | 3.00E-68  |
| T2-L2 | blue | Csa6G486960 | 4.496 | 0.000002502 | Transcription factor         | WRKY DNA-binding protein 51 (WRKY51)                          | 1.00E-36  |
| T2-L2 | blue | Csa2G058620 | 5.345 | 0.003945    | Abiotic stress               | DNAJ heat shock N-terminal domain-containing protein          | 2.00E-137 |

Supplementary Table 1 (Continued)

|       |      |             |       |             |                              |                                                               |           |
|-------|------|-------------|-------|-------------|------------------------------|---------------------------------------------------------------|-----------|
| T2-L2 | blue | Csa1G574970 | 1.827 | 1.18E-05    | Major CHO metabolism         | Hexokinase 2 (HXK2)                                           | 7.00E-51  |
| T2-L2 | blue | Csa4G618520 | 1.837 | 0.0001765   | Biodegradation of xenobiotic | UDP glycosyltransferase (UGT)                                 | 1.00E-132 |
| T2-L2 | blue | Csa2G003610 | 1.841 | 0.0003098   | Lipid metabolism             | Abnormal inflorescence meristem (AIM1)                        | 3.00E-294 |
| T2-L2 | blue | Csa3G730930 | 1.847 | 0.00004243  | Transport                    | Ammonium transporter 2 (AMT2)                                 | 8E-220    |
| T2-L2 | blue | Csa6G493850 | 1.86  | 1.50E-05    | Not assigned                 | unknown                                                       |           |
| T2-L2 | blue | Csa3G159420 | 1.871 | 1.61E-03    | Not assigned                 | unknown                                                       |           |
| T2-L2 | blue | Csa1G528610 | 1.874 | 0.00435     | Lipid metabolism             | Thylakoid membrane anion transporter 1 (ANTR1)                | 7.00E-236 |
| T2-L2 | blue | Csa1G181360 | 1.875 | 0.001947    | Transport                    | non-intrinsic ABC protein 9 (NAP9)                            | 3.00E-156 |
| T2-L2 | blue | Csa3G154410 | 2.05  | 1.63E-10    | Not assigned                 | unknown                                                       |           |
| T2-L2 | blue | Csa3G183950 | 2.092 | 0.0004285   | Abiotic stress               | Heat shock protein 83                                         | 0.00E+00  |
| T2-L2 | blue | Csa2G296090 | 2.143 | 2.44E-04    | Not assigned                 | unknown                                                       |           |
| T2-L2 | blue | Csa7G291720 | 2.169 | 0.006566    | Lipid metabolism             | Choline kinase                                                | 4.00E-133 |
| T2-L2 | blue | Csa2G427310 | 2.238 | 0.007581    | Transcription factor         | MYB domain protein 73 (MYB73)                                 | 1.00E-88  |
| T2-L2 | blue | Csa3G881750 | 2.24  | 0.009561    | Lipid metabolism             | PR5-like receptor kinase (PR5K)                               | 4.00E-154 |
| T2-L2 | blue | Csa5G589260 | 2.243 | 0           | Amino acid metabolism        | O-acetylserine(thiol) lyase (OAS-TL)                          | 4.00E-162 |
| T2-L2 | blue | Csa3G733350 | 2.317 | 0.00004435  | Cell organization            | RHO guanyl-nucleotide exchange factor 11 (ROPGEF11)           | 9.00E-41  |
| T2-L2 | blue | Csa2G004690 | 2.522 | 0.000004593 | Transcription factor         | Heat shock transcription factor C1 (HSFC1)                    | 5.00E-67  |
| T2-L2 | blue | Csa7G387690 | 2.631 | 0.000001654 | Transport                    | Sulfate transporter 3;1 (SULTR 3;1)                           | 3.00E-307 |
| T2-L2 | blue | Csa1G008520 | 2.771 | 0.00804     | Transport                    | Plasma membrane proton ATPase 4 (HA4)                         | 0.00E+00  |
| T2-L2 | blue | Csa6G514850 | 3.048 | 0.00009803  | Miscellaneous                | Cytochrome P450 family 77 subfamily B polypeptide 1 (CYP77B1) | 1.00E-241 |
| T2-L2 | blue | Csa5G604150 | 3.14  | 0.01        | Redox                        | Thioredoxin 2 (TRX2)                                          |           |
| T2-L2 | blue | Csa5G223070 | 3.216 | 0.003151    | Transcription factor         | WRKY DNA-binding protein 54 (WRKY54)                          | 3.00E-96  |
| T2-L2 | blue | Csa2G359890 | 3.289 | 3.70E-03    | Not assigned                 | unknown                                                       |           |
| T2-L2 | blue | Csa1G596520 | 3.4   | 0.0002165   | Protein degradation          | Cystein proteinases superfamily protein                       | 2.00E-168 |
| T2-L2 | blue | Csa7G395800 | 3.415 | 0.001823    | Miscellaneous                | Glutathione S-transferase phi 8 (GSTF8)                       | 3.00E-82  |
| T2-L2 | blue | Csa3G119700 | 3.575 | 0.00005376  | Transcription factor         | WRKY DNA-binding protein 53 (WRKY53)                          | 1.00E-102 |
| T2-L2 | blue | Csa6G381850 | 3.831 | 0.001156    | Transport                    | Amino acid permease 3 (AAP3)                                  | 2.00E-234 |
| T2-L2 | blue | Csa1G033160 | 4.495 | 0.006049    | Miscellaneous                | Glutathione S-transferase tau 9 (GSTU9)                       | 3.00E-68  |
| T2-L2 | blue | Csa6G486960 | 4.496 | 0.000002502 | Transcription factor         | WRKY DNA-binding protein 51 (WRKY51)                          | 1.00E-36  |
| T2-L2 | blue | Csa2G058620 | 5.345 | 0.003945    | Abiotic stress               | DNAJ heat shock N-terminal domain-containing protein          | 2.00E-137 |

Supplementary Table 1 (Continued)

|       |      |             |       |             |                              |                                                               |           |
|-------|------|-------------|-------|-------------|------------------------------|---------------------------------------------------------------|-----------|
| T2-L2 | blue | Csa1G574970 | 1.827 | 1.18E-05    | Major CHO metabolism         | Hexokinase 2 (HXK2)                                           | 7.00E-51  |
| T2-L2 | blue | Csa4G618520 | 1.837 | 0.0001765   | Biodegradation of xenobiotic | UDP glycosyltransferase (UGT)                                 | 1.00E-132 |
| T2-L2 | blue | Csa2G003610 | 1.841 | 0.0003098   | Lipid metabolism             | Abnormal inflorescence meristem (AIM1)                        | 3.00E-294 |
| T2-L2 | blue | Csa3G730930 | 1.847 | 0.00004243  | Transport                    | Ammonium transporter 2 (AMT2)                                 | 8E-220    |
| T2-L2 | blue | Csa6G493850 | 1.86  | 1.50E-05    | Not assigned                 | unknown                                                       |           |
| T2-L2 | blue | Csa3G159420 | 1.871 | 1.61E-03    | Not assigned                 | unknown                                                       |           |
| T2-L2 | blue | Csa1G528610 | 1.874 | 0.00435     | Lipid metabolism             | Thylakoid membrane anion transporter 1 (ANTR1)                | 7.00E-236 |
| T2-L2 | blue | Csa1G181360 | 1.875 | 0.001947    | Transport                    | non-intrinsic ABC protein 9 (NAP9)                            | 3.00E-156 |
| T2-L2 | blue | Csa3G154410 | 2.05  | 1.63E-10    | Not assigned                 | unknown                                                       |           |
| T2-L2 | blue | Csa3G183950 | 2.092 | 0.0004285   | Abiotic stress               | Heat shock protein 83                                         | 0.00E+00  |
| T2-L2 | blue | Csa2G296090 | 2.143 | 2.44E-04    | Not assigned                 | unknown                                                       |           |
| T2-L2 | blue | Csa7G291720 | 2.169 | 0.006566    | Lipid metabolism             | Choline kinase                                                | 4.00E-133 |
| T2-L2 | blue | Csa2G427310 | 2.238 | 0.007581    | Transcription factor         | MYB domain protein 73 (MYB73)                                 | 1.00E-88  |
| T2-L2 | blue | Csa3G881750 | 2.24  | 0.009561    | Lipid metabolism             | PR5-like receptor kinase (PR5K)                               | 4.00E-154 |
| T2-L2 | blue | Csa5G589260 | 2.243 | 0           | Amino acid metabolism        | O-acetylserine(thiol) lyase (OAS-TL)                          | 4.00E-162 |
| T2-L2 | blue | Csa3G733350 | 2.317 | 0.00004435  | Cell organization            | RHO guanyl-nucleotide exchange factor 11 (ROPGEF11)           | 9.00E-41  |
| T2-L2 | blue | Csa2G004690 | 2.522 | 0.000004593 | Transcription factor         | Heat shock transcription factor C1 (HSFC1)                    | 5.00E-67  |
| T2-L2 | blue | Csa7G387690 | 2.631 | 0.000001654 | Transport                    | Sulfate transporter 3;1 (SULTR 3;1)                           | 3.00E-307 |
| T2-L2 | blue | Csa1G008520 | 2.771 | 0.00804     | Transport                    | Plasma membrane proton ATPase 4 (HA4)                         | 0.00E+00  |
| T2-L2 | blue | Csa6G514850 | 3.048 | 0.00009803  | Miscellaneous                | Cytochrome P450 family 77 subfamily B polypeptide 1 (CYP77B1) | 1.00E-241 |
| T2-L2 | blue | Csa5G604150 | 3.14  | 0.01        | Redox                        | Thioredoxin 2 (TRX2)                                          |           |
| T2-L2 | blue | Csa5G223070 | 3.216 | 0.003151    | Transcription factor         | WRKY DNA-binding protein 54 (WRKY54)                          | 3.00E-96  |
| T2-L2 | blue | Csa2G359890 | 3.289 | 3.70E-03    | Not assigned                 | unknown                                                       |           |
| T2-L2 | blue | Csa1G596520 | 3.4   | 0.0002165   | Protein degradation          | Cystein proteinases superfamily protein                       | 2.00E-168 |
| T2-L2 | blue | Csa7G395800 | 3.415 | 0.001823    | Miscellaneous                | Glutathione S-transferase phi 8 (GSTF8)                       | 3.00E-82  |
| T2-L2 | blue | Csa3G119700 | 3.575 | 0.00005376  | Transcription factor         | WRKY DNA-binding protein 53 (WRKY53)                          | 1.00E-102 |
| T2-L2 | blue | Csa6G381850 | 3.831 | 0.001156    | Transport                    | Amino acid permease 3 (AAP3)                                  | 2.00E-234 |
| T2-L2 | blue | Csa1G033160 | 4.495 | 0.006049    | Miscellaneous                | Glutathione S-transferase tau 9 (GSTU9)                       | 3.00E-68  |
| T2-L2 | blue | Csa6G486960 | 4.496 | 0.000002502 | Transcription factor         | WRKY DNA-binding protein 51 (WRKY51)                          | 1.00E-36  |
| T2-L2 | blue | Csa2G058620 | 5.345 | 0.003945    | Abiotic stress               | DNAJ heat shock N-terminal domain-containing protein          | 2.00E-137 |

Supplementary Table 1 (Continued)

|       |      |             |       |             |                              |                                                               |           |
|-------|------|-------------|-------|-------------|------------------------------|---------------------------------------------------------------|-----------|
| T2-L2 | blue | Csa1G574970 | 1.827 | 1.18E-05    | Major CHO metabolism         | Hexokinase 2 (HXK2)                                           | 7.00E-51  |
| T2-L2 | blue | Csa4G618520 | 1.837 | 0.0001765   | Biodegradation of xenobiotic | UDP glycosyltransferase (UGT)                                 | 1.00E-132 |
| T2-L2 | blue | Csa2G003610 | 1.841 | 0.0003098   | Lipid metabolism             | Abnormal inflorescence meristem (AIM1)                        | 3.00E-294 |
| T2-L2 | blue | Csa3G730930 | 1.847 | 0.00004243  | Transport                    | Ammonium transporter 2 (AMT2)                                 | 8E-220    |
| T2-L2 | blue | Csa6G493850 | 1.86  | 1.50E-05    | Not assigned                 | unknown                                                       |           |
| T2-L2 | blue | Csa3G159420 | 1.871 | 1.61E-03    | Not assigned                 | unknown                                                       |           |
| T2-L2 | blue | Csa1G528610 | 1.874 | 0.00435     | Lipid metabolism             | Thylakoid membrane anion transporter 1 (ANTR1)                | 7.00E-236 |
| T2-L2 | blue | Csa1G181360 | 1.875 | 0.001947    | Transport                    | non-intrinsic ABC protein 9 (NAP9)                            | 3.00E-156 |
| T2-L2 | blue | Csa3G154410 | 2.05  | 1.63E-10    | Not assigned                 | unknown                                                       |           |
| T2-L2 | blue | Csa3G183950 | 2.092 | 0.0004285   | Abiotic stress               | Heat shock protein 83                                         | 0.00E+00  |
| T2-L2 | blue | Csa2G296090 | 2.143 | 2.44E-04    | Not assigned                 | unknown                                                       |           |
| T2-L2 | blue | Csa7G291720 | 2.169 | 0.006566    | Lipid metabolism             | Choline kinase                                                | 4.00E-133 |
| T2-L2 | blue | Csa2G427310 | 2.238 | 0.007581    | Transcription factor         | MYB domain protein 73 (MYB73)                                 | 1.00E-88  |
| T2-L2 | blue | Csa3G881750 | 2.24  | 0.009561    | Lipid metabolism             | PR5-like receptor kinase (PR5K)                               | 4.00E-154 |
| T2-L2 | blue | Csa5G589260 | 2.243 | 0           | Amino acid metabolism        | O-acetylserine(thiol) lyase (OAS-TL)                          | 4.00E-162 |
| T2-L2 | blue | Csa3G733350 | 2.317 | 0.00004435  | Cell organization            | RHO guanyl-nucleotide exchange factor 11 (ROPGEF11)           | 9.00E-41  |
| T2-L2 | blue | Csa2G004690 | 2.522 | 0.000004593 | Transcription factor         | Heat shock transcription factor C1 (HSFC1)                    | 5.00E-67  |
| T2-L2 | blue | Csa7G387690 | 2.631 | 0.000001654 | Transport                    | Sulfate transporter 3;1 (SULTR 3;1)                           | 3.00E-307 |
| T2-L2 | blue | Csa1G008520 | 2.771 | 0.00804     | Transport                    | Plasma membrane proton ATPase 4 (HA4)                         | 0.00E+00  |
| T2-L2 | blue | Csa6G514850 | 3.048 | 0.00009803  | Miscellaneous                | Cytochrome P450 family 77 subfamily B polypeptide 1 (CYP77B1) | 1.00E-241 |
| T2-L2 | blue | Csa5G604150 | 3.14  | 0.01        | Redox                        | Thioredoxin 2 (TRX2)                                          |           |
| T2-L2 | blue | Csa5G223070 | 3.216 | 0.003151    | Transcription factor         | WRKY DNA-binding protein 54 (WRKY54)                          | 3.00E-96  |
| T2-L2 | blue | Csa2G359890 | 3.289 | 3.70E-03    | Not assigned                 | unknown                                                       |           |
| T2-L2 | blue | Csa1G596520 | 3.4   | 0.0002165   | Protein degradation          | Cystein proteinases superfamily protein                       | 2.00E-168 |
| T2-L2 | blue | Csa7G395800 | 3.415 | 0.001823    | Miscellaneous                | Glutathione S-transferase phi 8 (GSTF8)                       | 3.00E-82  |
| T2-L2 | blue | Csa3G119700 | 3.575 | 0.00005376  | Transcription factor         | WRKY DNA-binding protein 53 (WRKY53)                          | 1.00E-102 |
| T2-L2 | blue | Csa6G381850 | 3.831 | 0.001156    | Transport                    | Amino acid permease 3 (AAP3)                                  | 2.00E-234 |
| T2-L2 | blue | Csa1G033160 | 4.495 | 0.006049    | Miscellaneous                | Glutathione S-transferase tau 9 (GSTU9)                       | 3.00E-68  |
| T2-L2 | blue | Csa6G486960 | 4.496 | 0.000002502 | Transcription factor         | WRKY DNA-binding protein 51 (WRKY51)                          | 1.00E-36  |
| T2-L2 | blue | Csa2G058620 | 5.345 | 0.003945    | Abiotic stress               | DNAJ heat shock N-terminal domain-containing protein          | 2.00E-137 |



Supplementary Table 1 (Continued)

|       |      |             |       |             |                              |                                                               |           |
|-------|------|-------------|-------|-------------|------------------------------|---------------------------------------------------------------|-----------|
| T2-L2 | blue | Csa1G574970 | 1.827 | 1.18E-05    | Major CHO metabolism         | Hexokinase 2 (HXK2)                                           | 7.00E-51  |
| T2-L2 | blue | Csa4G618520 | 1.837 | 0.0001765   | Biodegradation of xenobiotic | UDP glycosyltransferase (UGT)                                 | 1.00E-132 |
| T2-L2 | blue | Csa2G003610 | 1.841 | 0.0003098   | Lipid metabolism             | Abnormal inflorescence meristem (AIM1)                        | 3.00E-294 |
| T2-L2 | blue | Csa3G730930 | 1.847 | 0.00004243  | Transport                    | Ammonium transporter 2 (AMT2)                                 | 8E-220    |
| T2-L2 | blue | Csa6G493850 | 1.86  | 1.50E-05    | Not assigned                 | unknown                                                       |           |
| T2-L2 | blue | Csa3G159420 | 1.871 | 1.61E-03    | Not assigned                 | unknown                                                       |           |
| T2-L2 | blue | Csa1G528610 | 1.874 | 0.00435     | Lipid metabolism             | Thylakoid membrane anion transporter 1 (ANTR1)                | 7.00E-236 |
| T2-L2 | blue | Csa1G181360 | 1.875 | 0.001947    | Transport                    | non-intrinsic ABC protein 9 (NAP9)                            | 3.00E-156 |
| T2-L2 | blue | Csa3G154410 | 2.05  | 1.63E-10    | Not assigned                 | unknown                                                       |           |
| T2-L2 | blue | Csa3G183950 | 2.092 | 0.0004285   | Abiotic stress               | Heat shock protein 83                                         | 0.00E+00  |
| T2-L2 | blue | Csa2G296090 | 2.143 | 2.44E-04    | Not assigned                 | unknown                                                       |           |
| T2-L2 | blue | Csa7G291720 | 2.169 | 0.006566    | Lipid metabolism             | Choline kinase                                                | 4.00E-133 |
| T2-L2 | blue | Csa2G427310 | 2.238 | 0.007581    | Transcription factor         | MYB domain protein 73 (MYB73)                                 | 1.00E-88  |
| T2-L2 | blue | Csa3G881750 | 2.24  | 0.009561    | Lipid metabolism             | PR5-like receptor kinase (PR5K)                               | 4.00E-154 |
| T2-L2 | blue | Csa5G589260 | 2.243 | 0           | Amino acid metabolism        | O-acetylserine(thiol) lyase (OAS-TL)                          | 4.00E-162 |
| T2-L2 | blue | Csa3G733350 | 2.317 | 0.00004435  | Cell organization            | RHO guanyl-nucleotide exchange factor 11 (ROPGEF11)           | 9.00E-41  |
| T2-L2 | blue | Csa2G004690 | 2.522 | 0.000004593 | Transcription factor         | Heat shock transcription factor C1 (HSFC1)                    | 5.00E-67  |
| T2-L2 | blue | Csa7G387690 | 2.631 | 0.000001654 | Transport                    | Sulfate transporter 3;1 (SULTR 3;1)                           | 3.00E-307 |
| T2-L2 | blue | Csa1G008520 | 2.771 | 0.00804     | Transport                    | Plasma membrane proton ATPase 4 (HA4)                         | 0.00E+00  |
| T2-L2 | blue | Csa6G514850 | 3.048 | 0.00009803  | Miscellaneous                | Cytochrome P450 family 77 subfamily B polypeptide 1 (CYP77B1) | 1.00E-241 |
| T2-L2 | blue | Csa5G604150 | 3.14  | 0.01        | Redox                        | Thioredoxin 2 (TRX2)                                          |           |
| T2-L2 | blue | Csa5G223070 | 3.216 | 0.003151    | Transcription factor         | WRKY DNA-binding protein 54 (WRKY54)                          | 3.00E-96  |
| T2-L2 | blue | Csa2G359890 | 3.289 | 3.70E-03    | Not assigned                 | unknown                                                       |           |
| T2-L2 | blue | Csa1G596520 | 3.4   | 0.0002165   | Protein degradation          | Cystein proteinases superfamily protein                       | 2.00E-168 |
| T2-L2 | blue | Csa7G395800 | 3.415 | 0.001823    | Miscellaneous                | Glutathione S-transferase phi 8 (GSTF8)                       | 3.00E-82  |
| T2-L2 | blue | Csa3G119700 | 3.575 | 0.00005376  | Transcription factor         | WRKY DNA-binding protein 53 (WRKY53)                          | 1.00E-102 |
| T2-L2 | blue | Csa6G381850 | 3.831 | 0.001156    | Transport                    | Amino acid permease 3 (AAP3)                                  | 2.00E-234 |
| T2-L2 | blue | Csa1G033160 | 4.495 | 0.006049    | Miscellaneous                | Glutathione S-transferase tau 9 (GSTU9)                       | 3.00E-68  |
| T2-L2 | blue | Csa6G486960 | 4.496 | 0.000002502 | Transcription factor         | WRKY DNA-binding protein 51 (WRKY51)                          | 1.00E-36  |
| T2-L2 | blue | Csa2G058620 | 5.345 | 0.003945    | Abiotic stress               | DNAJ heat shock N-terminal domain-containing protein          | 2.00E-137 |

Supplementary Table 1 (Continued)

|       |      |             |       |             |                              |                                                               |           |
|-------|------|-------------|-------|-------------|------------------------------|---------------------------------------------------------------|-----------|
| T2-L2 | blue | Csa1G574970 | 1.827 | 1.18E-05    | Major CHO metabolism         | Hexokinase 2 (HXK2)                                           | 7.00E-51  |
| T2-L2 | blue | Csa4G618520 | 1.837 | 0.0001765   | Biodegradation of xenobiotic | UDP glycosyltransferase (UGT)                                 | 1.00E-132 |
| T2-L2 | blue | Csa2G003610 | 1.841 | 0.0003098   | Lipid metabolism             | Abnormal inflorescence meristem (AIM1)                        | 3.00E-294 |
| T2-L2 | blue | Csa3G730930 | 1.847 | 0.00004243  | Transport                    | Ammonium transporter 2 (AMT2)                                 | 8E-220    |
| T2-L2 | blue | Csa6G493850 | 1.86  | 1.50E-05    | Not assigned                 | unknown                                                       |           |
| T2-L2 | blue | Csa3G159420 | 1.871 | 1.61E-03    | Not assigned                 | unknown                                                       |           |
| T2-L2 | blue | Csa1G528610 | 1.874 | 0.00435     | Lipid metabolism             | Thylakoid membrane anion transporter 1 (ANTR1)                | 7.00E-236 |
| T2-L2 | blue | Csa1G181360 | 1.875 | 0.001947    | Transport                    | non-intrinsic ABC protein 9 (NAP9)                            | 3.00E-156 |
| T2-L2 | blue | Csa3G154410 | 2.05  | 1.63E-10    | Not assigned                 | unknown                                                       |           |
| T2-L2 | blue | Csa3G183950 | 2.092 | 0.0004285   | Abiotic stress               | Heat shock protein 83                                         | 0.00E+00  |
| T2-L2 | blue | Csa2G296090 | 2.143 | 2.44E-04    | Not assigned                 | unknown                                                       |           |
| T2-L2 | blue | Csa7G291720 | 2.169 | 0.006566    | Lipid metabolism             | Choline kinase                                                | 4.00E-133 |
| T2-L2 | blue | Csa2G427310 | 2.238 | 0.007581    | Transcription factor         | MYB domain protein 73 (MYB73)                                 | 1.00E-88  |
| T2-L2 | blue | Csa3G881750 | 2.24  | 0.009561    | Lipid metabolism             | PR5-like receptor kinase (PR5K)                               | 4.00E-154 |
| T2-L2 | blue | Csa5G589260 | 2.243 | 0           | Amino acid metabolism        | O-acetylserine(thiol) lyase (OAS-TL)                          | 4.00E-162 |
| T2-L2 | blue | Csa3G733350 | 2.317 | 0.00004435  | Cell organization            | RHO guanyl-nucleotide exchange factor 11 (ROPGEF11)           | 9.00E-41  |
| T2-L2 | blue | Csa2G004690 | 2.522 | 0.000004593 | Transcription factor         | Heat shock transcription factor C1 (HSFC1)                    | 5.00E-67  |
| T2-L2 | blue | Csa7G387690 | 2.631 | 0.000001654 | Transport                    | Sulfate transporter 3;1 (SULTR 3;1)                           | 3.00E-307 |
| T2-L2 | blue | Csa1G008520 | 2.771 | 0.00804     | Transport                    | Plasma membrane proton ATPase 4 (HA4)                         | 0.00E+00  |
| T2-L2 | blue | Csa6G514850 | 3.048 | 0.00009803  | Miscellaneous                | Cytochrome P450 family 77 subfamily B polypeptide 1 (CYP77B1) | 1.00E-241 |
| T2-L2 | blue | Csa5G604150 | 3.14  | 0.01        | Redox                        | Thioredoxin 2 (TRX2)                                          |           |
| T2-L2 | blue | Csa5G223070 | 3.216 | 0.003151    | Transcription factor         | WRKY DNA-binding protein 54 (WRKY54)                          | 3.00E-96  |
| T2-L2 | blue | Csa2G359890 | 3.289 | 3.70E-03    | Not assigned                 | unknown                                                       |           |
| T2-L2 | blue | Csa1G596520 | 3.4   | 0.0002165   | Protein degradation          | Cystein proteinases superfamily protein                       | 2.00E-168 |
| T2-L2 | blue | Csa7G395800 | 3.415 | 0.001823    | Miscellaneous                | Glutathione S-transferase phi 8 (GSTF8)                       | 3.00E-82  |
| T2-L2 | blue | Csa3G119700 | 3.575 | 0.00005376  | Transcription factor         | WRKY DNA-binding protein 53 (WRKY53)                          | 1.00E-102 |
| T2-L2 | blue | Csa6G381850 | 3.831 | 0.001156    | Transport                    | Amino acid permease 3 (AAP3)                                  | 2.00E-234 |
| T2-L2 | blue | Csa1G033160 | 4.495 | 0.006049    | Miscellaneous                | Glutathione S-transferase tau 9 (GSTU9)                       | 3.00E-68  |
| T2-L2 | blue | Csa6G486960 | 4.496 | 0.000002502 | Transcription factor         | WRKY DNA-binding protein 51 (WRKY51)                          | 1.00E-36  |
| T2-L2 | blue | Csa2G058620 | 5.345 | 0.003945    | Abiotic stress               | DNAJ heat shock N-terminal domain-containing protein          | 2.00E-137 |

Supplementary Table 1 (Continued)

|       |      |             |       |             |                              |                                                               |           |
|-------|------|-------------|-------|-------------|------------------------------|---------------------------------------------------------------|-----------|
| T2-L2 | blue | Csa1G574970 | 1.827 | 1.18E-05    | Major CHO metabolism         | Hexokinase 2 (HXK2)                                           | 7.00E-51  |
| T2-L2 | blue | Csa4G618520 | 1.837 | 0.0001765   | Biodegradation of xenobiotic | UDP glycosyltransferase (UGT)                                 | 1.00E-132 |
| T2-L2 | blue | Csa2G003610 | 1.841 | 0.0003098   | Lipid metabolism             | Abnormal inflorescence meristem (AIM1)                        | 3.00E-294 |
| T2-L2 | blue | Csa3G730930 | 1.847 | 0.00004243  | Transport                    | Ammonium transporter 2 (AMT2)                                 | 8E-220    |
| T2-L2 | blue | Csa6G493850 | 1.86  | 1.50E-05    | Not assigned                 | unknown                                                       |           |
| T2-L2 | blue | Csa3G159420 | 1.871 | 1.61E-03    | Not assigned                 | unknown                                                       |           |
| T2-L2 | blue | Csa1G528610 | 1.874 | 0.00435     | Lipid metabolism             | Thylakoid membrane anion transporter 1 (ANTR1)                | 7.00E-236 |
| T2-L2 | blue | Csa1G181360 | 1.875 | 0.001947    | Transport                    | non-intrinsic ABC protein 9 (NAP9)                            | 3.00E-156 |
| T2-L2 | blue | Csa3G154410 | 2.05  | 1.63E-10    | Not assigned                 | unknown                                                       |           |
| T2-L2 | blue | Csa3G183950 | 2.092 | 0.0004285   | Abiotic stress               | Heat shock protein 83                                         | 0.00E+00  |
| T2-L2 | blue | Csa2G296090 | 2.143 | 2.44E-04    | Not assigned                 | unknown                                                       |           |
| T2-L2 | blue | Csa7G291720 | 2.169 | 0.006566    | Lipid metabolism             | Choline kinase                                                | 4.00E-133 |
| T2-L2 | blue | Csa2G427310 | 2.238 | 0.007581    | Transcription factor         | MYB domain protein 73 (MYB73)                                 | 1.00E-88  |
| T2-L2 | blue | Csa3G881750 | 2.24  | 0.009561    | Lipid metabolism             | PR5-like receptor kinase (PR5K)                               | 4.00E-154 |
| T2-L2 | blue | Csa5G589260 | 2.243 | 0           | Amino acid metabolism        | O-acetylserine(thiol) lyase (OAS-TL)                          | 4.00E-162 |
| T2-L2 | blue | Csa3G733350 | 2.317 | 0.00004435  | Cell organization            | RHO guanyl-nucleotide exchange factor 11 (ROPGEF11)           | 9.00E-41  |
| T2-L2 | blue | Csa2G004690 | 2.522 | 0.000004593 | Transcription factor         | Heat shock transcription factor C1 (HSFC1)                    | 5.00E-67  |
| T2-L2 | blue | Csa7G387690 | 2.631 | 0.000001654 | Transport                    | Sulfate transporter 3;1 (SULTR 3;1)                           | 3.00E-307 |
| T2-L2 | blue | Csa1G008520 | 2.771 | 0.00804     | Transport                    | Plasma membrane proton ATPase 4 (HA4)                         | 0.00E+00  |
| T2-L2 | blue | Csa6G514850 | 3.048 | 0.00009803  | Miscellaneous                | Cytochrome P450 family 77 subfamily B polypeptide 1 (CYP77B1) | 1.00E-241 |
| T2-L2 | blue | Csa5G604150 | 3.14  | 0.01        | Redox                        | Thioredoxin 2 (TRX2)                                          |           |
| T2-L2 | blue | Csa5G223070 | 3.216 | 0.003151    | Transcription factor         | WRKY DNA-binding protein 54 (WRKY54)                          | 3.00E-96  |
| T2-L2 | blue | Csa2G359890 | 3.289 | 3.70E-03    | Not assigned                 | unknown                                                       |           |
| T2-L2 | blue | Csa1G596520 | 3.4   | 0.0002165   | Protein degradation          | Cystein proteinases superfamily protein                       | 2.00E-168 |
| T2-L2 | blue | Csa7G395800 | 3.415 | 0.001823    | Miscellaneous                | Glutathione S-transferase phi 8 (GSTF8)                       | 3.00E-82  |
| T2-L2 | blue | Csa3G119700 | 3.575 | 0.00005376  | Transcription factor         | WRKY DNA-binding protein 53 (WRKY53)                          | 1.00E-102 |
| T2-L2 | blue | Csa6G381850 | 3.831 | 0.001156    | Transport                    | Amino acid permease 3 (AAP3)                                  | 2.00E-234 |
| T2-L2 | blue | Csa1G033160 | 4.495 | 0.006049    | Miscellaneous                | Glutathione S-transferase tau 9 (GSTU9)                       | 3.00E-68  |
| T2-L2 | blue | Csa6G486960 | 4.496 | 0.000002502 | Transcription factor         | WRKY DNA-binding protein 51 (WRKY51)                          | 1.00E-36  |
| T2-L2 | blue | Csa2G058620 | 5.345 | 0.003945    | Abiotic stress               | DNAJ heat shock N-terminal domain-containing protein          | 2.00E-137 |

Supplementary Table 1 (Continued)

|       |      |             |       |             |                              |                                                               |           |
|-------|------|-------------|-------|-------------|------------------------------|---------------------------------------------------------------|-----------|
| T2-L2 | blue | Csa1G574970 | 1.827 | 1.18E-05    | Major CHO metabolism         | Hexokinase 2 (HXK2)                                           | 7.00E-51  |
| T2-L2 | blue | Csa4G618520 | 1.837 | 0.0001765   | Biodegradation of xenobiotic | UDP glycosyltransferase (UGT)                                 | 1.00E-132 |
| T2-L2 | blue | Csa2G003610 | 1.841 | 0.0003098   | Lipid metabolism             | Abnormal inflorescence meristem (AIM1)                        | 3.00E-294 |
| T2-L2 | blue | Csa3G730930 | 1.847 | 0.00004243  | Transport                    | Ammonium transporter 2 (AMT2)                                 | 8E-220    |
| T2-L2 | blue | Csa6G493850 | 1.86  | 1.50E-05    | Not assigned                 | unknown                                                       |           |
| T2-L2 | blue | Csa3G159420 | 1.871 | 1.61E-03    | Not assigned                 | unknown                                                       |           |
| T2-L2 | blue | Csa1G528610 | 1.874 | 0.00435     | Lipid metabolism             | Thylakoid membrane anion transporter 1 (ANTR1)                | 7.00E-236 |
| T2-L2 | blue | Csa1G181360 | 1.875 | 0.001947    | Transport                    | non-intrinsic ABC protein 9 (NAP9)                            | 3.00E-156 |
| T2-L2 | blue | Csa3G154410 | 2.05  | 1.63E-10    | Not assigned                 | unknown                                                       |           |
| T2-L2 | blue | Csa3G183950 | 2.092 | 0.0004285   | Abiotic stress               | Heat shock protein 83                                         | 0.00E+00  |
| T2-L2 | blue | Csa2G296090 | 2.143 | 2.44E-04    | Not assigned                 | unknown                                                       |           |
| T2-L2 | blue | Csa7G291720 | 2.169 | 0.006566    | Lipid metabolism             | Choline kinase                                                | 4.00E-133 |
| T2-L2 | blue | Csa2G427310 | 2.238 | 0.007581    | Transcription factor         | MYB domain protein 73 (MYB73)                                 | 1.00E-88  |
| T2-L2 | blue | Csa3G881750 | 2.24  | 0.009561    | Lipid metabolism             | PR5-like receptor kinase (PR5K)                               | 4.00E-154 |
| T2-L2 | blue | Csa5G589260 | 2.243 | 0           | Amino acid metabolism        | O-acetylserine(thiol) lyase (OAS-TL)                          | 4.00E-162 |
| T2-L2 | blue | Csa3G733350 | 2.317 | 0.00004435  | Cell organization            | RHO guanyl-nucleotide exchange factor 11 (ROPGEF11)           | 9.00E-41  |
| T2-L2 | blue | Csa2G004690 | 2.522 | 0.000004593 | Transcription factor         | Heat shock transcription factor C1 (HSFC1)                    | 5.00E-67  |
| T2-L2 | blue | Csa7G387690 | 2.631 | 0.000001654 | Transport                    | Sulfate transporter 3;1 (SULTR 3;1)                           | 3.00E-307 |
| T2-L2 | blue | Csa1G008520 | 2.771 | 0.00804     | Transport                    | Plasma membrane proton ATPase 4 (HA4)                         | 0.00E+00  |
| T2-L2 | blue | Csa6G514850 | 3.048 | 0.00009803  | Miscellaneous                | Cytochrome P450 family 77 subfamily B polypeptide 1 (CYP77B1) | 1.00E-241 |
| T2-L2 | blue | Csa5G604150 | 3.14  | 0.01        | Redox                        | Thioredoxin 2 (TRX2)                                          |           |
| T2-L2 | blue | Csa5G223070 | 3.216 | 0.003151    | Transcription factor         | WRKY DNA-binding protein 54 (WRKY54)                          | 3.00E-96  |
| T2-L2 | blue | Csa2G359890 | 3.289 | 3.70E-03    | Not assigned                 | unknown                                                       |           |
| T2-L2 | blue | Csa1G596520 | 3.4   | 0.0002165   | Protein degradation          | Cystein proteinases superfamily protein                       | 2.00E-168 |
| T2-L2 | blue | Csa7G395800 | 3.415 | 0.001823    | Miscellaneous                | Glutathione S-transferase phi 8 (GSTF8)                       | 3.00E-82  |
| T2-L2 | blue | Csa3G119700 | 3.575 | 0.00005376  | Transcription factor         | WRKY DNA-binding protein 53 (WRKY53)                          | 1.00E-102 |
| T2-L2 | blue | Csa6G381850 | 3.831 | 0.001156    | Transport                    | Amino acid permease 3 (AAP3)                                  | 2.00E-234 |
| T2-L2 | blue | Csa1G033160 | 4.495 | 0.006049    | Miscellaneous                | Glutathione S-transferase tau 9 (GSTU9)                       | 3.00E-68  |
| T2-L2 | blue | Csa6G486960 | 4.496 | 0.000002502 | Transcription factor         | WRKY DNA-binding protein 51 (WRKY51)                          | 1.00E-36  |
| T2-L2 | blue | Csa2G058620 | 5.345 | 0.003945    | Abiotic stress               | DNAJ heat shock N-terminal domain-containing protein          | 2.00E-137 |

Supplementary Table 1 (Continued)

|       |      |             |       |             |                              |                                                               |           |
|-------|------|-------------|-------|-------------|------------------------------|---------------------------------------------------------------|-----------|
| T2-L2 | blue | Csa1G574970 | 1.827 | 1.18E-05    | Major CHO metabolism         | Hexokinase 2 (HXK2)                                           | 7.00E-51  |
| T2-L2 | blue | Csa4G618520 | 1.837 | 0.0001765   | Biodegradation of xenobiotic | UDP glycosyltransferase (UGT)                                 | 1.00E-132 |
| T2-L2 | blue | Csa2G003610 | 1.841 | 0.0003098   | Lipid metabolism             | Abnormal inflorescence meristem (AIM1)                        | 3.00E-294 |
| T2-L2 | blue | Csa3G730930 | 1.847 | 0.00004243  | Transport                    | Ammonium transporter 2 (AMT2)                                 | 8E-220    |
| T2-L2 | blue | Csa6G493850 | 1.86  | 1.50E-05    | Not assigned                 | unknown                                                       |           |
| T2-L2 | blue | Csa3G159420 | 1.871 | 1.61E-03    | Not assigned                 | unknown                                                       |           |
| T2-L2 | blue | Csa1G528610 | 1.874 | 0.00435     | Lipid metabolism             | Thylakoid membrane anion transporter 1 (ANTR1)                | 7.00E-236 |
| T2-L2 | blue | Csa1G181360 | 1.875 | 0.001947    | Transport                    | non-intrinsic ABC protein 9 (NAP9)                            | 3.00E-156 |
| T2-L2 | blue | Csa3G154410 | 2.05  | 1.63E-10    | Not assigned                 | unknown                                                       |           |
| T2-L2 | blue | Csa3G183950 | 2.092 | 0.0004285   | Abiotic stress               | Heat shock protein 83                                         | 0.00E+00  |
| T2-L2 | blue | Csa2G296090 | 2.143 | 2.44E-04    | Not assigned                 | unknown                                                       |           |
| T2-L2 | blue | Csa7G291720 | 2.169 | 0.006566    | Lipid metabolism             | Choline kinase                                                | 4.00E-133 |
| T2-L2 | blue | Csa2G427310 | 2.238 | 0.007581    | Transcription factor         | MYB domain protein 73 (MYB73)                                 | 1.00E-88  |
| T2-L2 | blue | Csa3G881750 | 2.24  | 0.009561    | Lipid metabolism             | PR5-like receptor kinase (PR5K)                               | 4.00E-154 |
| T2-L2 | blue | Csa5G589260 | 2.243 | 0           | Amino acid metabolism        | O-acetylserine(thiol) lyase (OAS-TL)                          | 4.00E-162 |
| T2-L2 | blue | Csa3G733350 | 2.317 | 0.00004435  | Cell organization            | RHO guanyl-nucleotide exchange factor 11 (ROPGEF11)           | 9.00E-41  |
| T2-L2 | blue | Csa2G004690 | 2.522 | 0.000004593 | Transcription factor         | Heat shock transcription factor C1 (HSFC1)                    | 5.00E-67  |
| T2-L2 | blue | Csa7G387690 | 2.631 | 0.000001654 | Transport                    | Sulfate transporter 3;1 (SULTR 3;1)                           | 3.00E-307 |
| T2-L2 | blue | Csa1G008520 | 2.771 | 0.00804     | Transport                    | Plasma membrane proton ATPase 4 (HA4)                         | 0.00E+00  |
| T2-L2 | blue | Csa6G514850 | 3.048 | 0.00009803  | Miscellaneous                | Cytochrome P450 family 77 subfamily B polypeptide 1 (CYP77B1) | 1.00E-241 |
| T2-L2 | blue | Csa5G604150 | 3.14  | 0.01        | Redox                        | Thioredoxin 2 (TRX2)                                          |           |
| T2-L2 | blue | Csa5G223070 | 3.216 | 0.003151    | Transcription factor         | WRKY DNA-binding protein 54 (WRKY54)                          | 3.00E-96  |
| T2-L2 | blue | Csa2G359890 | 3.289 | 3.70E-03    | Not assigned                 | unknown                                                       |           |
| T2-L2 | blue | Csa1G596520 | 3.4   | 0.0002165   | Protein degradation          | Cystein proteinases superfamily protein                       | 2.00E-168 |
| T2-L2 | blue | Csa7G395800 | 3.415 | 0.001823    | Miscellaneous                | Glutathione S-transferase phi 8 (GSTF8)                       | 3.00E-82  |
| T2-L2 | blue | Csa3G119700 | 3.575 | 0.00005376  | Transcription factor         | WRKY DNA-binding protein 53 (WRKY53)                          | 1.00E-102 |
| T2-L2 | blue | Csa6G381850 | 3.831 | 0.001156    | Transport                    | Amino acid permease 3 (AAP3)                                  | 2.00E-234 |
| T2-L2 | blue | Csa1G033160 | 4.495 | 0.006049    | Miscellaneous                | Glutathione S-transferase tau 9 (GSTU9)                       | 3.00E-68  |
| T2-L2 | blue | Csa6G486960 | 4.496 | 0.000002502 | Transcription factor         | WRKY DNA-binding protein 51 (WRKY51)                          | 1.00E-36  |
| T2-L2 | blue | Csa2G058620 | 5.345 | 0.003945    | Abiotic stress               | DNAJ heat shock N-terminal domain-containing protein          | 2.00E-137 |

Supplementary Table 1 (Continued)

|       |      |             |       |             |                              |                                                               |           |
|-------|------|-------------|-------|-------------|------------------------------|---------------------------------------------------------------|-----------|
| T2-L2 | blue | Csa1G574970 | 1.827 | 1.18E-05    | Major CHO metabolism         | Hexokinase 2 (HXK2)                                           | 7.00E-51  |
| T2-L2 | blue | Csa4G618520 | 1.837 | 0.0001765   | Biodegradation of xenobiotic | UDP glycosyltransferase (UGT)                                 | 1.00E-132 |
| T2-L2 | blue | Csa2G003610 | 1.841 | 0.0003098   | Lipid metabolism             | Abnormal inflorescence meristem (AIM1)                        | 3.00E-294 |
| T2-L2 | blue | Csa3G730930 | 1.847 | 0.00004243  | Transport                    | Ammonium transporter 2 (AMT2)                                 | 8E-220    |
| T2-L2 | blue | Csa6G493850 | 1.86  | 1.50E-05    | Not assigned                 | unknown                                                       |           |
| T2-L2 | blue | Csa3G159420 | 1.871 | 1.61E-03    | Not assigned                 | unknown                                                       |           |
| T2-L2 | blue | Csa1G528610 | 1.874 | 0.00435     | Lipid metabolism             | Thylakoid membrane anion transporter 1 (ANTR1)                | 7.00E-236 |
| T2-L2 | blue | Csa1G181360 | 1.875 | 0.001947    | Transport                    | non-intrinsic ABC protein 9 (NAP9)                            | 3.00E-156 |
| T2-L2 | blue | Csa3G154410 | 2.05  | 1.63E-10    | Not assigned                 | unknown                                                       |           |
| T2-L2 | blue | Csa3G183950 | 2.092 | 0.0004285   | Abiotic stress               | Heat shock protein 83                                         | 0.00E+00  |
| T2-L2 | blue | Csa2G296090 | 2.143 | 2.44E-04    | Not assigned                 | unknown                                                       |           |
| T2-L2 | blue | Csa7G291720 | 2.169 | 0.006566    | Lipid metabolism             | Choline kinase                                                | 4.00E-133 |
| T2-L2 | blue | Csa2G427310 | 2.238 | 0.007581    | Transcription factor         | MYB domain protein 73 (MYB73)                                 | 1.00E-88  |
| T2-L2 | blue | Csa3G881750 | 2.24  | 0.009561    | Lipid metabolism             | PR5-like receptor kinase (PR5K)                               | 4.00E-154 |
| T2-L2 | blue | Csa5G589260 | 2.243 | 0           | Amino acid metabolism        | O-acetylserine(thiol) lyase (OAS-TL)                          | 4.00E-162 |
| T2-L2 | blue | Csa3G733350 | 2.317 | 0.00004435  | Cell organization            | RHO guanyl-nucleotide exchange factor 11 (ROPGEF11)           | 9.00E-41  |
| T2-L2 | blue | Csa2G004690 | 2.522 | 0.000004593 | Transcription factor         | Heat shock transcription factor C1 (HSFC1)                    | 5.00E-67  |
| T2-L2 | blue | Csa7G387690 | 2.631 | 0.000001654 | Transport                    | Sulfate transporter 3;1 (SULTR 3;1)                           | 3.00E-307 |
| T2-L2 | blue | Csa1G008520 | 2.771 | 0.00804     | Transport                    | Plasma membrane proton ATPase 4 (HA4)                         | 0.00E+00  |
| T2-L2 | blue | Csa6G514850 | 3.048 | 0.00009803  | Miscellaneous                | Cytochrome P450 family 77 subfamily B polypeptide 1 (CYP77B1) | 1.00E-241 |
| T2-L2 | blue | Csa5G604150 | 3.14  | 0.01        | Redox                        | Thioredoxin 2 (TRX2)                                          |           |
| T2-L2 | blue | Csa5G223070 | 3.216 | 0.003151    | Transcription factor         | WRKY DNA-binding protein 54 (WRKY54)                          | 3.00E-96  |
| T2-L2 | blue | Csa2G359890 | 3.289 | 3.70E-03    | Not assigned                 | unknown                                                       |           |
| T2-L2 | blue | Csa1G596520 | 3.4   | 0.0002165   | Protein degradation          | Cystein proteinases superfamily protein                       | 2.00E-168 |
| T2-L2 | blue | Csa7G395800 | 3.415 | 0.001823    | Miscellaneous                | Glutathione S-transferase phi 8 (GSTF8)                       | 3.00E-82  |
| T2-L2 | blue | Csa3G119700 | 3.575 | 0.00005376  | Transcription factor         | WRKY DNA-binding protein 53 (WRKY53)                          | 1.00E-102 |
| T2-L2 | blue | Csa6G381850 | 3.831 | 0.001156    | Transport                    | Amino acid permease 3 (AAP3)                                  | 2.00E-234 |
| T2-L2 | blue | Csa1G033160 | 4.495 | 0.006049    | Miscellaneous                | Glutathione S-transferase tau 9 (GSTU9)                       | 3.00E-68  |
| T2-L2 | blue | Csa6G486960 | 4.496 | 0.000002502 | Transcription factor         | WRKY DNA-binding protein 51 (WRKY51)                          | 1.00E-36  |
| T2-L2 | blue | Csa2G058620 | 5.345 | 0.003945    | Abiotic stress               | DNAJ heat shock N-terminal domain-containing protein          | 2.00E-137 |

Supplementary Table 1 (Continued)

|       |      |             |       |             |                              |                                                               |           |
|-------|------|-------------|-------|-------------|------------------------------|---------------------------------------------------------------|-----------|
| T2-L2 | blue | Csa1G574970 | 1.827 | 1.18E-05    | Major CHO metabolism         | Hexokinase 2 (HXK2)                                           | 7.00E-51  |
| T2-L2 | blue | Csa4G618520 | 1.837 | 0.0001765   | Biodegradation of xenobiotic | UDP glycosyltransferase (UGT)                                 | 1.00E-132 |
| T2-L2 | blue | Csa2G003610 | 1.841 | 0.0003098   | Lipid metabolism             | Abnormal inflorescence meristem (AIM1)                        | 3.00E-294 |
| T2-L2 | blue | Csa3G730930 | 1.847 | 0.00004243  | Transport                    | Ammonium transporter 2 (AMT2)                                 | 8E-220    |
| T2-L2 | blue | Csa6G493850 | 1.86  | 1.50E-05    | Not assigned                 | unknown                                                       |           |
| T2-L2 | blue | Csa3G159420 | 1.871 | 1.61E-03    | Not assigned                 | unknown                                                       |           |
| T2-L2 | blue | Csa1G528610 | 1.874 | 0.00435     | Lipid metabolism             | Thylakoid membrane anion transporter 1 (ANTR1)                | 7.00E-236 |
| T2-L2 | blue | Csa1G181360 | 1.875 | 0.001947    | Transport                    | non-intrinsic ABC protein 9 (NAP9)                            | 3.00E-156 |
| T2-L2 | blue | Csa3G154410 | 2.05  | 1.63E-10    | Not assigned                 | unknown                                                       |           |
| T2-L2 | blue | Csa3G183950 | 2.092 | 0.0004285   | Abiotic stress               | Heat shock protein 83                                         | 0.00E+00  |
| T2-L2 | blue | Csa2G296090 | 2.143 | 2.44E-04    | Not assigned                 | unknown                                                       |           |
| T2-L2 | blue | Csa7G291720 | 2.169 | 0.006566    | Lipid metabolism             | Choline kinase                                                | 4.00E-133 |
| T2-L2 | blue | Csa2G427310 | 2.238 | 0.007581    | Transcription factor         | MYB domain protein 73 (MYB73)                                 | 1.00E-88  |
| T2-L2 | blue | Csa3G881750 | 2.24  | 0.009561    | Lipid metabolism             | PR5-like receptor kinase (PR5K)                               | 4.00E-154 |
| T2-L2 | blue | Csa5G589260 | 2.243 | 0           | Amino acid metabolism        | O-acetylserine(thiol) lyase (OAS-TL)                          | 4.00E-162 |
| T2-L2 | blue | Csa3G733350 | 2.317 | 0.00004435  | Cell organization            | RHO guanyl-nucleotide exchange factor 11 (ROPGEF11)           | 9.00E-41  |
| T2-L2 | blue | Csa2G004690 | 2.522 | 0.000004593 | Transcription factor         | Heat shock transcription factor C1 (HSFC1)                    | 5.00E-67  |
| T2-L2 | blue | Csa7G387690 | 2.631 | 0.000001654 | Transport                    | Sulfate transporter 3;1 (SULTR 3;1)                           | 3.00E-307 |
| T2-L2 | blue | Csa1G008520 | 2.771 | 0.00804     | Transport                    | Plasma membrane proton ATPase 4 (HA4)                         | 0.00E+00  |
| T2-L2 | blue | Csa6G514850 | 3.048 | 0.00009803  | Miscellaneous                | Cytochrome P450 family 77 subfamily B polypeptide 1 (CYP77B1) | 1.00E-241 |
| T2-L2 | blue | Csa5G604150 | 3.14  | 0.01        | Redox                        | Thioredoxin 2 (TRX2)                                          |           |
| T2-L2 | blue | Csa5G223070 | 3.216 | 0.003151    | Transcription factor         | WRKY DNA-binding protein 54 (WRKY54)                          | 3.00E-96  |
| T2-L2 | blue | Csa2G359890 | 3.289 | 3.70E-03    | Not assigned                 | unknown                                                       |           |
| T2-L2 | blue | Csa1G596520 | 3.4   | 0.0002165   | Protein degradation          | Cystein proteinases superfamily protein                       | 2.00E-168 |
| T2-L2 | blue | Csa7G395800 | 3.415 | 0.001823    | Miscellaneous                | Glutathione S-transferase phi 8 (GSTF8)                       | 3.00E-82  |
| T2-L2 | blue | Csa3G119700 | 3.575 | 0.00005376  | Transcription factor         | WRKY DNA-binding protein 53 (WRKY53)                          | 1.00E-102 |
| T2-L2 | blue | Csa6G381850 | 3.831 | 0.001156    | Transport                    | Amino acid permease 3 (AAP3)                                  | 2.00E-234 |
| T2-L2 | blue | Csa1G033160 | 4.495 | 0.006049    | Miscellaneous                | Glutathione S-transferase tau 9 (GSTU9)                       | 3.00E-68  |
| T2-L2 | blue | Csa6G486960 | 4.496 | 0.000002502 | Transcription factor         | WRKY DNA-binding protein 51 (WRKY51)                          | 1.00E-36  |
| T2-L2 | blue | Csa2G058620 | 5.345 | 0.003945    | Abiotic stress               | DNAJ heat shock N-terminal domain-containing protein          | 2.00E-137 |

Supplementary Table 1 (Continued)

|       |      |             |       |             |                              |                                                               |           |
|-------|------|-------------|-------|-------------|------------------------------|---------------------------------------------------------------|-----------|
| T2-L2 | blue | Csa1G574970 | 1.827 | 1.18E-05    | Major CHO metabolism         | Hexokinase 2 (HXK2)                                           | 7.00E-51  |
| T2-L2 | blue | Csa4G618520 | 1.837 | 0.0001765   | Biodegradation of xenobiotic | UDP glycosyltransferase (UGT)                                 | 1.00E-132 |
| T2-L2 | blue | Csa2G003610 | 1.841 | 0.0003098   | Lipid metabolism             | Abnormal inflorescence meristem (AIM1)                        | 3.00E-294 |
| T2-L2 | blue | Csa3G730930 | 1.847 | 0.00004243  | Transport                    | Ammonium transporter 2 (AMT2)                                 | 8E-220    |
| T2-L2 | blue | Csa6G493850 | 1.86  | 1.50E-05    | Not assigned                 | unknown                                                       |           |
| T2-L2 | blue | Csa3G159420 | 1.871 | 1.61E-03    | Not assigned                 | unknown                                                       |           |
| T2-L2 | blue | Csa1G528610 | 1.874 | 0.00435     | Lipid metabolism             | Thylakoid membrane anion transporter 1 (ANTR1)                | 7.00E-236 |
| T2-L2 | blue | Csa1G181360 | 1.875 | 0.001947    | Transport                    | non-intrinsic ABC protein 9 (NAP9)                            | 3.00E-156 |
| T2-L2 | blue | Csa3G154410 | 2.05  | 1.63E-10    | Not assigned                 | unknown                                                       |           |
| T2-L2 | blue | Csa3G183950 | 2.092 | 0.0004285   | Abiotic stress               | Heat shock protein 83                                         | 0.00E+00  |
| T2-L2 | blue | Csa2G296090 | 2.143 | 2.44E-04    | Not assigned                 | unknown                                                       |           |
| T2-L2 | blue | Csa7G291720 | 2.169 | 0.006566    | Lipid metabolism             | Choline kinase                                                | 4.00E-133 |
| T2-L2 | blue | Csa2G427310 | 2.238 | 0.007581    | Transcription factor         | MYB domain protein 73 (MYB73)                                 | 1.00E-88  |
| T2-L2 | blue | Csa3G881750 | 2.24  | 0.009561    | Lipid metabolism             | PR5-like receptor kinase (PR5K)                               | 4.00E-154 |
| T2-L2 | blue | Csa5G589260 | 2.243 | 0           | Amino acid metabolism        | O-acetylserine(thiol) lyase (OAS-TL)                          | 4.00E-162 |
| T2-L2 | blue | Csa3G733350 | 2.317 | 0.00004435  | Cell organization            | RHO guanyl-nucleotide exchange factor 11 (ROPGEF11)           | 9.00E-41  |
| T2-L2 | blue | Csa2G004690 | 2.522 | 0.000004593 | Transcription factor         | Heat shock transcription factor C1 (HSFC1)                    | 5.00E-67  |
| T2-L2 | blue | Csa7G387690 | 2.631 | 0.000001654 | Transport                    | Sulfate transporter 3;1 (SULTR 3;1)                           | 3.00E-307 |
| T2-L2 | blue | Csa1G008520 | 2.771 | 0.00804     | Transport                    | Plasma membrane proton ATPase 4 (HA4)                         | 0.00E+00  |
| T2-L2 | blue | Csa6G514850 | 3.048 | 0.00009803  | Miscellaneous                | Cytochrome P450 family 77 subfamily B polypeptide 1 (CYP77B1) | 1.00E-241 |
| T2-L2 | blue | Csa5G604150 | 3.14  | 0.01        | Redox                        | Thioredoxin 2 (TRX2)                                          |           |
| T2-L2 | blue | Csa5G223070 | 3.216 | 0.003151    | Transcription factor         | WRKY DNA-binding protein 54 (WRKY54)                          | 3.00E-96  |
| T2-L2 | blue | Csa2G359890 | 3.289 | 3.70E-03    | Not assigned                 | unknown                                                       |           |
| T2-L2 | blue | Csa1G596520 | 3.4   | 0.0002165   | Protein degradation          | Cystein proteinases superfamily protein                       | 2.00E-168 |
| T2-L2 | blue | Csa7G395800 | 3.415 | 0.001823    | Miscellaneous                | Glutathione S-transferase phi 8 (GSTF8)                       | 3.00E-82  |
| T2-L2 | blue | Csa3G119700 | 3.575 | 0.00005376  | Transcription factor         | WRKY DNA-binding protein 53 (WRKY53)                          | 1.00E-102 |
| T2-L2 | blue | Csa6G381850 | 3.831 | 0.001156    | Transport                    | Amino acid permease 3 (AAP3)                                  | 2.00E-234 |
| T2-L2 | blue | Csa1G033160 | 4.495 | 0.006049    | Miscellaneous                | Glutathione S-transferase tau 9 (GSTU9)                       | 3.00E-68  |
| T2-L2 | blue | Csa6G486960 | 4.496 | 0.000002502 | Transcription factor         | WRKY DNA-binding protein 51 (WRKY51)                          | 1.00E-36  |
| T2-L2 | blue | Csa2G058620 | 5.345 | 0.003945    | Abiotic stress               | DNAJ heat shock N-terminal domain-containing protein          | 2.00E-137 |



Supplementary Table 1 (Continued)

|       |      |             |       |             |                              |                                                               |           |
|-------|------|-------------|-------|-------------|------------------------------|---------------------------------------------------------------|-----------|
| T2-L2 | blue | Csa1G574970 | 1.827 | 1.18E-05    | Major CHO metabolism         | Hexokinase 2 (HXK2)                                           | 7.00E-51  |
| T2-L2 | blue | Csa4G618520 | 1.837 | 0.0001765   | Biodegradation of xenobiotic | UDP glycosyltransferase (UGT)                                 | 1.00E-132 |
| T2-L2 | blue | Csa2G003610 | 1.841 | 0.0003098   | Lipid metabolism             | Abnormal inflorescence meristem (AIM1)                        | 3.00E-294 |
| T2-L2 | blue | Csa3G730930 | 1.847 | 0.00004243  | Transport                    | Ammonium transporter 2 (AMT2)                                 | 8E-220    |
| T2-L2 | blue | Csa6G493850 | 1.86  | 1.50E-05    | Not assigned                 | unknown                                                       |           |
| T2-L2 | blue | Csa3G159420 | 1.871 | 1.61E-03    | Not assigned                 | unknown                                                       |           |
| T2-L2 | blue | Csa1G528610 | 1.874 | 0.00435     | Lipid metabolism             | Thylakoid membrane anion transporter 1 (ANTR1)                | 7.00E-236 |
| T2-L2 | blue | Csa1G181360 | 1.875 | 0.001947    | Transport                    | non-intrinsic ABC protein 9 (NAP9)                            | 3.00E-156 |
| T2-L2 | blue | Csa3G154410 | 2.05  | 1.63E-10    | Not assigned                 | unknown                                                       |           |
| T2-L2 | blue | Csa3G183950 | 2.092 | 0.0004285   | Abiotic stress               | Heat shock protein 83                                         | 0.00E+00  |
| T2-L2 | blue | Csa2G296090 | 2.143 | 2.44E-04    | Not assigned                 | unknown                                                       |           |
| T2-L2 | blue | Csa7G291720 | 2.169 | 0.006566    | Lipid metabolism             | Choline kinase                                                | 4.00E-133 |
| T2-L2 | blue | Csa2G427310 | 2.238 | 0.007581    | Transcription factor         | MYB domain protein 73 (MYB73)                                 | 1.00E-88  |
| T2-L2 | blue | Csa3G881750 | 2.24  | 0.009561    | Lipid metabolism             | PR5-like receptor kinase (PR5K)                               | 4.00E-154 |
| T2-L2 | blue | Csa5G589260 | 2.243 | 0           | Amino acid metabolism        | O-acetylserine(thiol) lyase (OAS-TL)                          | 4.00E-162 |
| T2-L2 | blue | Csa3G733350 | 2.317 | 0.00004435  | Cell organization            | RHO guanyl-nucleotide exchange factor 11 (ROPGEF11)           | 9.00E-41  |
| T2-L2 | blue | Csa2G004690 | 2.522 | 0.000004593 | Transcription factor         | Heat shock transcription factor C1 (HSFC1)                    | 5.00E-67  |
| T2-L2 | blue | Csa7G387690 | 2.631 | 0.000001654 | Transport                    | Sulfate transporter 3;1 (SULTR 3;1)                           | 3.00E-307 |
| T2-L2 | blue | Csa1G008520 | 2.771 | 0.00804     | Transport                    | Plasma membrane proton ATPase 4 (HA4)                         | 0.00E+00  |
| T2-L2 | blue | Csa6G514850 | 3.048 | 0.00009803  | Miscellaneous                | Cytochrome P450 family 77 subfamily B polypeptide 1 (CYP77B1) | 1.00E-241 |
| T2-L2 | blue | Csa5G604150 | 3.14  | 0.01        | Redox                        | Thioredoxin 2 (TRX2)                                          |           |
| T2-L2 | blue | Csa5G223070 | 3.216 | 0.003151    | Transcription factor         | WRKY DNA-binding protein 54 (WRKY54)                          | 3.00E-96  |
| T2-L2 | blue | Csa2G359890 | 3.289 | 3.70E-03    | Not assigned                 | unknown                                                       |           |
| T2-L2 | blue | Csa1G596520 | 3.4   | 0.0002165   | Protein degradation          | Cystein proteinases superfamily protein                       | 2.00E-168 |
| T2-L2 | blue | Csa7G395800 | 3.415 | 0.001823    | Miscellaneous                | Glutathione S-transferase phi 8 (GSTF8)                       | 3.00E-82  |
| T2-L2 | blue | Csa3G119700 | 3.575 | 0.00005376  | Transcription factor         | WRKY DNA-binding protein 53 (WRKY53)                          | 1.00E-102 |
| T2-L2 | blue | Csa6G381850 | 3.831 | 0.001156    | Transport                    | Amino acid permease 3 (AAP3)                                  | 2.00E-234 |
| T2-L2 | blue | Csa1G033160 | 4.495 | 0.006049    | Miscellaneous                | Glutathione S-transferase tau 9 (GSTU9)                       | 3.00E-68  |
| T2-L2 | blue | Csa6G486960 | 4.496 | 0.000002502 | Transcription factor         | WRKY DNA-binding protein 51 (WRKY51)                          | 1.00E-36  |
| T2-L2 | blue | Csa2G058620 | 5.345 | 0.003945    | Abiotic stress               | DNAJ heat shock N-terminal domain-containing protein          | 2.00E-137 |

Supplementary Table 1 (Continued)

|       |      |             |       |             |                              |                                                               |           |
|-------|------|-------------|-------|-------------|------------------------------|---------------------------------------------------------------|-----------|
| T2-L2 | blue | Csa1G574970 | 1.827 | 1.18E-05    | Major CHO metabolism         | Hexokinase 2 (HXK2)                                           | 7.00E-51  |
| T2-L2 | blue | Csa4G618520 | 1.837 | 0.0001765   | Biodegradation of xenobiotic | UDP glycosyltransferase (UGT)                                 | 1.00E-132 |
| T2-L2 | blue | Csa2G003610 | 1.841 | 0.0003098   | Lipid metabolism             | Abnormal inflorescence meristem (AIM1)                        | 3.00E-294 |
| T2-L2 | blue | Csa3G730930 | 1.847 | 0.00004243  | Transport                    | Ammonium transporter 2 (AMT2)                                 | 8E-220    |
| T2-L2 | blue | Csa6G493850 | 1.86  | 1.50E-05    | Not assigned                 | unknown                                                       |           |
| T2-L2 | blue | Csa3G159420 | 1.871 | 1.61E-03    | Not assigned                 | unknown                                                       |           |
| T2-L2 | blue | Csa1G528610 | 1.874 | 0.00435     | Lipid metabolism             | Thylakoid membrane anion transporter 1 (ANTR1)                | 7.00E-236 |
| T2-L2 | blue | Csa1G181360 | 1.875 | 0.001947    | Transport                    | non-intrinsic ABC protein 9 (NAP9)                            | 3.00E-156 |
| T2-L2 | blue | Csa3G154410 | 2.05  | 1.63E-10    | Not assigned                 | unknown                                                       |           |
| T2-L2 | blue | Csa3G183950 | 2.092 | 0.0004285   | Abiotic stress               | Heat shock protein 83                                         | 0.00E+00  |
| T2-L2 | blue | Csa2G296090 | 2.143 | 2.44E-04    | Not assigned                 | unknown                                                       |           |
| T2-L2 | blue | Csa7G291720 | 2.169 | 0.006566    | Lipid metabolism             | Choline kinase                                                | 4.00E-133 |
| T2-L2 | blue | Csa2G427310 | 2.238 | 0.007581    | Transcription factor         | MYB domain protein 73 (MYB73)                                 | 1.00E-88  |
| T2-L2 | blue | Csa3G881750 | 2.24  | 0.009561    | Lipid metabolism             | PR5-like receptor kinase (PR5K)                               | 4.00E-154 |
| T2-L2 | blue | Csa5G589260 | 2.243 | 0           | Amino acid metabolism        | O-acetylserine(thiol) lyase (OAS-TL)                          | 4.00E-162 |
| T2-L2 | blue | Csa3G733350 | 2.317 | 0.00004435  | Cell organization            | RHO guanyl-nucleotide exchange factor 11 (ROPGEF11)           | 9.00E-41  |
| T2-L2 | blue | Csa2G004690 | 2.522 | 0.000004593 | Transcription factor         | Heat shock transcription factor C1 (HSFC1)                    | 5.00E-67  |
| T2-L2 | blue | Csa7G387690 | 2.631 | 0.000001654 | Transport                    | Sulfate transporter 3;1 (SULTR 3;1)                           | 3.00E-307 |
| T2-L2 | blue | Csa1G008520 | 2.771 | 0.00804     | Transport                    | Plasma membrane proton ATPase 4 (HA4)                         | 0.00E+00  |
| T2-L2 | blue | Csa6G514850 | 3.048 | 0.00009803  | Miscellaneous                | Cytochrome P450 family 77 subfamily B polypeptide 1 (CYP77B1) | 1.00E-241 |
| T2-L2 | blue | Csa5G604150 | 3.14  | 0.01        | Redox                        | Thioredoxin 2 (TRX2)                                          |           |
| T2-L2 | blue | Csa5G223070 | 3.216 | 0.003151    | Transcription factor         | WRKY DNA-binding protein 54 (WRKY54)                          | 3.00E-96  |
| T2-L2 | blue | Csa2G359890 | 3.289 | 3.70E-03    | Not assigned                 | unknown                                                       |           |
| T2-L2 | blue | Csa1G596520 | 3.4   | 0.0002165   | Protein degradation          | Cystein proteinases superfamily protein                       | 2.00E-168 |
| T2-L2 | blue | Csa7G395800 | 3.415 | 0.001823    | Miscellaneous                | Glutathione S-transferase phi 8 (GSTF8)                       | 3.00E-82  |
| T2-L2 | blue | Csa3G119700 | 3.575 | 0.00005376  | Transcription factor         | WRKY DNA-binding protein 53 (WRKY53)                          | 1.00E-102 |
| T2-L2 | blue | Csa6G381850 | 3.831 | 0.001156    | Transport                    | Amino acid permease 3 (AAP3)                                  | 2.00E-234 |
| T2-L2 | blue | Csa1G033160 | 4.495 | 0.006049    | Miscellaneous                | Glutathione S-transferase tau 9 (GSTU9)                       | 3.00E-68  |
| T2-L2 | blue | Csa6G486960 | 4.496 | 0.000002502 | Transcription factor         | WRKY DNA-binding protein 51 (WRKY51)                          | 1.00E-36  |
| T2-L2 | blue | Csa2G058620 | 5.345 | 0.003945    | Abiotic stress               | DNAJ heat shock N-terminal domain-containing protein          | 2.00E-137 |

Supplementary Table 1 (Continued)

|       |      |             |       |             |                              |                                                               |           |
|-------|------|-------------|-------|-------------|------------------------------|---------------------------------------------------------------|-----------|
| T2-L2 | blue | Csa1G574970 | 1.827 | 1.18E-05    | Major CHO metabolism         | Hexokinase 2 (HXK2)                                           | 7.00E-51  |
| T2-L2 | blue | Csa4G618520 | 1.837 | 0.0001765   | Biodegradation of xenobiotic | UDP glycosyltransferase (UGT)                                 | 1.00E-132 |
| T2-L2 | blue | Csa2G003610 | 1.841 | 0.0003098   | Lipid metabolism             | Abnormal inflorescence meristem (AIM1)                        | 3.00E-294 |
| T2-L2 | blue | Csa3G730930 | 1.847 | 0.00004243  | Transport                    | Ammonium transporter 2 (AMT2)                                 | 8E-220    |
| T2-L2 | blue | Csa6G493850 | 1.86  | 1.50E-05    | Not assigned                 | unknown                                                       |           |
| T2-L2 | blue | Csa3G159420 | 1.871 | 1.61E-03    | Not assigned                 | unknown                                                       |           |
| T2-L2 | blue | Csa1G528610 | 1.874 | 0.00435     | Lipid metabolism             | Thylakoid membrane anion transporter 1 (ANTR1)                | 7.00E-236 |
| T2-L2 | blue | Csa1G181360 | 1.875 | 0.001947    | Transport                    | non-intrinsic ABC protein 9 (NAP9)                            | 3.00E-156 |
| T2-L2 | blue | Csa3G154410 | 2.05  | 1.63E-10    | Not assigned                 | unknown                                                       |           |
| T2-L2 | blue | Csa3G183950 | 2.092 | 0.0004285   | Abiotic stress               | Heat shock protein 83                                         | 0.00E+00  |
| T2-L2 | blue | Csa2G296090 | 2.143 | 2.44E-04    | Not assigned                 | unknown                                                       |           |
| T2-L2 | blue | Csa7G291720 | 2.169 | 0.006566    | Lipid metabolism             | Choline kinase                                                | 4.00E-133 |
| T2-L2 | blue | Csa2G427310 | 2.238 | 0.007581    | Transcription factor         | MYB domain protein 73 (MYB73)                                 | 1.00E-88  |
| T2-L2 | blue | Csa3G881750 | 2.24  | 0.009561    | Lipid metabolism             | PR5-like receptor kinase (PR5K)                               | 4.00E-154 |
| T2-L2 | blue | Csa5G589260 | 2.243 | 0           | Amino acid metabolism        | O-acetylserine(thiol) lyase (OAS-TL)                          | 4.00E-162 |
| T2-L2 | blue | Csa3G733350 | 2.317 | 0.00004435  | Cell organization            | RHO guanyl-nucleotide exchange factor 11 (ROPGEF11)           | 9.00E-41  |
| T2-L2 | blue | Csa2G004690 | 2.522 | 0.000004593 | Transcription factor         | Heat shock transcription factor C1 (HSFC1)                    | 5.00E-67  |
| T2-L2 | blue | Csa7G387690 | 2.631 | 0.000001654 | Transport                    | Sulfate transporter 3;1 (SULTR 3;1)                           | 3.00E-307 |
| T2-L2 | blue | Csa1G008520 | 2.771 | 0.00804     | Transport                    | Plasma membrane proton ATPase 4 (HA4)                         | 0.00E+00  |
| T2-L2 | blue | Csa6G514850 | 3.048 | 0.00009803  | Miscellaneous                | Cytochrome P450 family 77 subfamily B polypeptide 1 (CYP77B1) | 1.00E-241 |
| T2-L2 | blue | Csa5G604150 | 3.14  | 0.01        | Redox                        | Thioredoxin 2 (TRX2)                                          |           |
| T2-L2 | blue | Csa5G223070 | 3.216 | 0.003151    | Transcription factor         | WRKY DNA-binding protein 54 (WRKY54)                          | 3.00E-96  |
| T2-L2 | blue | Csa2G359890 | 3.289 | 3.70E-03    | Not assigned                 | unknown                                                       |           |
| T2-L2 | blue | Csa1G596520 | 3.4   | 0.0002165   | Protein degradation          | Cystein proteinases superfamily protein                       | 2.00E-168 |
| T2-L2 | blue | Csa7G395800 | 3.415 | 0.001823    | Miscellaneous                | Glutathione S-transferase phi 8 (GSTF8)                       | 3.00E-82  |
| T2-L2 | blue | Csa3G119700 | 3.575 | 0.00005376  | Transcription factor         | WRKY DNA-binding protein 53 (WRKY53)                          | 1.00E-102 |
| T2-L2 | blue | Csa6G381850 | 3.831 | 0.001156    | Transport                    | Amino acid permease 3 (AAP3)                                  | 2.00E-234 |
| T2-L2 | blue | Csa1G033160 | 4.495 | 0.006049    | Miscellaneous                | Glutathione S-transferase tau 9 (GSTU9)                       | 3.00E-68  |
| T2-L2 | blue | Csa6G486960 | 4.496 | 0.000002502 | Transcription factor         | WRKY DNA-binding protein 51 (WRKY51)                          | 1.00E-36  |
| T2-L2 | blue | Csa2G058620 | 5.345 | 0.003945    | Abiotic stress               | DNAJ heat shock N-terminal domain-containing protein          | 2.00E-137 |

Supplementary Table 1 (Continued)

|       |      |             |       |             |                              |                                                               |           |
|-------|------|-------------|-------|-------------|------------------------------|---------------------------------------------------------------|-----------|
| T2-L2 | blue | Csa1G574970 | 1.827 | 1.18E-05    | Major CHO metabolism         | Hexokinase 2 (HXK2)                                           | 7.00E-51  |
| T2-L2 | blue | Csa4G618520 | 1.837 | 0.0001765   | Biodegradation of xenobiotic | UDP glycosyltransferase (UGT)                                 | 1.00E-132 |
| T2-L2 | blue | Csa2G003610 | 1.841 | 0.0003098   | Lipid metabolism             | Abnormal inflorescence meristem (AIM1)                        | 3.00E-294 |
| T2-L2 | blue | Csa3G730930 | 1.847 | 0.00004243  | Transport                    | Ammonium transporter 2 (AMT2)                                 | 8E-220    |
| T2-L2 | blue | Csa6G493850 | 1.86  | 1.50E-05    | Not assigned                 | unknown                                                       |           |
| T2-L2 | blue | Csa3G159420 | 1.871 | 1.61E-03    | Not assigned                 | unknown                                                       |           |
| T2-L2 | blue | Csa1G528610 | 1.874 | 0.00435     | Lipid metabolism             | Thylakoid membrane anion transporter 1 (ANTR1)                | 7.00E-236 |
| T2-L2 | blue | Csa1G181360 | 1.875 | 0.001947    | Transport                    | non-intrinsic ABC protein 9 (NAP9)                            | 3.00E-156 |
| T2-L2 | blue | Csa3G154410 | 2.05  | 1.63E-10    | Not assigned                 | unknown                                                       |           |
| T2-L2 | blue | Csa3G183950 | 2.092 | 0.0004285   | Abiotic stress               | Heat shock protein 83                                         | 0.00E+00  |
| T2-L2 | blue | Csa2G296090 | 2.143 | 2.44E-04    | Not assigned                 | unknown                                                       |           |
| T2-L2 | blue | Csa7G291720 | 2.169 | 0.006566    | Lipid metabolism             | Choline kinase                                                | 4.00E-133 |
| T2-L2 | blue | Csa2G427310 | 2.238 | 0.007581    | Transcription factor         | MYB domain protein 73 (MYB73)                                 | 1.00E-88  |
| T2-L2 | blue | Csa3G881750 | 2.24  | 0.009561    | Lipid metabolism             | PR5-like receptor kinase (PR5K)                               | 4.00E-154 |
| T2-L2 | blue | Csa5G589260 | 2.243 | 0           | Amino acid metabolism        | O-acetylserine(thiol) lyase (OAS-TL)                          | 4.00E-162 |
| T2-L2 | blue | Csa3G733350 | 2.317 | 0.00004435  | Cell organization            | RHO guanyl-nucleotide exchange factor 11 (ROPGEF11)           | 9.00E-41  |
| T2-L2 | blue | Csa2G004690 | 2.522 | 0.000004593 | Transcription factor         | Heat shock transcription factor C1 (HSFC1)                    | 5.00E-67  |
| T2-L2 | blue | Csa7G387690 | 2.631 | 0.000001654 | Transport                    | Sulfate transporter 3;1 (SULTR 3;1)                           | 3.00E-307 |
| T2-L2 | blue | Csa1G008520 | 2.771 | 0.00804     | Transport                    | Plasma membrane proton ATPase 4 (HA4)                         | 0.00E+00  |
| T2-L2 | blue | Csa6G514850 | 3.048 | 0.00009803  | Miscellaneous                | Cytochrome P450 family 77 subfamily B polypeptide 1 (CYP77B1) | 1.00E-241 |
| T2-L2 | blue | Csa5G604150 | 3.14  | 0.01        | Redox                        | Thioredoxin 2 (TRX2)                                          |           |
| T2-L2 | blue | Csa5G223070 | 3.216 | 0.003151    | Transcription factor         | WRKY DNA-binding protein 54 (WRKY54)                          | 3.00E-96  |
| T2-L2 | blue | Csa2G359890 | 3.289 | 3.70E-03    | Not assigned                 | unknown                                                       |           |
| T2-L2 | blue | Csa1G596520 | 3.4   | 0.0002165   | Protein degradation          | Cystein proteinases superfamily protein                       | 2.00E-168 |
| T2-L2 | blue | Csa7G395800 | 3.415 | 0.001823    | Miscellaneous                | Glutathione S-transferase phi 8 (GSTF8)                       | 3.00E-82  |
| T2-L2 | blue | Csa3G119700 | 3.575 | 0.00005376  | Transcription factor         | WRKY DNA-binding protein 53 (WRKY53)                          | 1.00E-102 |
| T2-L2 | blue | Csa6G381850 | 3.831 | 0.001156    | Transport                    | Amino acid permease 3 (AAP3)                                  | 2.00E-234 |
| T2-L2 | blue | Csa1G033160 | 4.495 | 0.006049    | Miscellaneous                | Glutathione S-transferase tau 9 (GSTU9)                       | 3.00E-68  |
| T2-L2 | blue | Csa6G486960 | 4.496 | 0.000002502 | Transcription factor         | WRKY DNA-binding protein 51 (WRKY51)                          | 1.00E-36  |
| T2-L2 | blue | Csa2G058620 | 5.345 | 0.003945    | Abiotic stress               | DNAJ heat shock N-terminal domain-containing protein          | 2.00E-137 |

Supplementary Table 1 (Continued)

|       |      |             |       |             |                              |                                                               |           |
|-------|------|-------------|-------|-------------|------------------------------|---------------------------------------------------------------|-----------|
| T2-L2 | blue | Csa1G574970 | 1.827 | 1.18E-05    | Major CHO metabolism         | Hexokinase 2 (HXK2)                                           | 7.00E-51  |
| T2-L2 | blue | Csa4G618520 | 1.837 | 0.0001765   | Biodegradation of xenobiotic | UDP glycosyltransferase (UGT)                                 | 1.00E-132 |
| T2-L2 | blue | Csa2G003610 | 1.841 | 0.0003098   | Lipid metabolism             | Abnormal inflorescence meristem (AIM1)                        | 3.00E-294 |
| T2-L2 | blue | Csa3G730930 | 1.847 | 0.00004243  | Transport                    | Ammonium transporter 2 (AMT2)                                 | 8E-220    |
| T2-L2 | blue | Csa6G493850 | 1.86  | 1.50E-05    | Not assigned                 | unknown                                                       |           |
| T2-L2 | blue | Csa3G159420 | 1.871 | 1.61E-03    | Not assigned                 | unknown                                                       |           |
| T2-L2 | blue | Csa1G528610 | 1.874 | 0.00435     | Lipid metabolism             | Thylakoid membrane anion transporter 1 (ANTR1)                | 7.00E-236 |
| T2-L2 | blue | Csa1G181360 | 1.875 | 0.001947    | Transport                    | non-intrinsic ABC protein 9 (NAP9)                            | 3.00E-156 |
| T2-L2 | blue | Csa3G154410 | 2.05  | 1.63E-10    | Not assigned                 | unknown                                                       |           |
| T2-L2 | blue | Csa3G183950 | 2.092 | 0.0004285   | Abiotic stress               | Heat shock protein 83                                         | 0.00E+00  |
| T2-L2 | blue | Csa2G296090 | 2.143 | 2.44E-04    | Not assigned                 | unknown                                                       |           |
| T2-L2 | blue | Csa7G291720 | 2.169 | 0.006566    | Lipid metabolism             | Choline kinase                                                | 4.00E-133 |
| T2-L2 | blue | Csa2G427310 | 2.238 | 0.007581    | Transcription factor         | MYB domain protein 73 (MYB73)                                 | 1.00E-88  |
| T2-L2 | blue | Csa3G881750 | 2.24  | 0.009561    | Lipid metabolism             | PR5-like receptor kinase (PR5K)                               | 4.00E-154 |
| T2-L2 | blue | Csa5G589260 | 2.243 | 0           | Amino acid metabolism        | O-acetylserine(thiol) lyase (OAS-TL)                          | 4.00E-162 |
| T2-L2 | blue | Csa3G733350 | 2.317 | 0.00004435  | Cell organization            | RHO guanyl-nucleotide exchange factor 11 (ROPGEF11)           | 9.00E-41  |
| T2-L2 | blue | Csa2G004690 | 2.522 | 0.000004593 | Transcription factor         | Heat shock transcription factor C1 (HSFC1)                    | 5.00E-67  |
| T2-L2 | blue | Csa7G387690 | 2.631 | 0.000001654 | Transport                    | Sulfate transporter 3;1 (SULTR 3;1)                           | 3.00E-307 |
| T2-L2 | blue | Csa1G008520 | 2.771 | 0.00804     | Transport                    | Plasma membrane proton ATPase 4 (HA4)                         | 0.00E+00  |
| T2-L2 | blue | Csa6G514850 | 3.048 | 0.00009803  | Miscellaneous                | Cytochrome P450 family 77 subfamily B polypeptide 1 (CYP77B1) | 1.00E-241 |
| T2-L2 | blue | Csa5G604150 | 3.14  | 0.01        | Redox                        | Thioredoxin 2 (TRX2)                                          |           |
| T2-L2 | blue | Csa5G223070 | 3.216 | 0.003151    | Transcription factor         | WRKY DNA-binding protein 54 (WRKY54)                          | 3.00E-96  |
| T2-L2 | blue | Csa2G359890 | 3.289 | 3.70E-03    | Not assigned                 | unknown                                                       |           |
| T2-L2 | blue | Csa1G596520 | 3.4   | 0.0002165   | Protein degradation          | Cystein proteinases superfamily protein                       | 2.00E-168 |
| T2-L2 | blue | Csa7G395800 | 3.415 | 0.001823    | Miscellaneous                | Glutathione S-transferase phi 8 (GSTF8)                       | 3.00E-82  |
| T2-L2 | blue | Csa3G119700 | 3.575 | 0.00005376  | Transcription factor         | WRKY DNA-binding protein 53 (WRKY53)                          | 1.00E-102 |
| T2-L2 | blue | Csa6G381850 | 3.831 | 0.001156    | Transport                    | Amino acid permease 3 (AAP3)                                  | 2.00E-234 |
| T2-L2 | blue | Csa1G033160 | 4.495 | 0.006049    | Miscellaneous                | Glutathione S-transferase tau 9 (GSTU9)                       | 3.00E-68  |
| T2-L2 | blue | Csa6G486960 | 4.496 | 0.000002502 | Transcription factor         | WRKY DNA-binding protein 51 (WRKY51)                          | 1.00E-36  |
| T2-L2 | blue | Csa2G058620 | 5.345 | 0.003945    | Abiotic stress               | DNAJ heat shock N-terminal domain-containing protein          | 2.00E-137 |

Supplementary Table 1 (Continued)

|       |      |             |       |             |                              |                                                               |           |
|-------|------|-------------|-------|-------------|------------------------------|---------------------------------------------------------------|-----------|
| T2-L2 | blue | Csa1G574970 | 1.827 | 1.18E-05    | Major CHO metabolism         | Hexokinase 2 (HXK2)                                           | 7.00E-51  |
| T2-L2 | blue | Csa4G618520 | 1.837 | 0.0001765   | Biodegradation of xenobiotic | UDP glycosyltransferase (UGT)                                 | 1.00E-132 |
| T2-L2 | blue | Csa2G003610 | 1.841 | 0.0003098   | Lipid metabolism             | Abnormal inflorescence meristem (AIM1)                        | 3.00E-294 |
| T2-L2 | blue | Csa3G730930 | 1.847 | 0.00004243  | Transport                    | Ammonium transporter 2 (AMT2)                                 | 8E-220    |
| T2-L2 | blue | Csa6G493850 | 1.86  | 1.50E-05    | Not assigned                 | unknown                                                       |           |
| T2-L2 | blue | Csa3G159420 | 1.871 | 1.61E-03    | Not assigned                 | unknown                                                       |           |
| T2-L2 | blue | Csa1G528610 | 1.874 | 0.00435     | Lipid metabolism             | Thylakoid membrane anion transporter 1 (ANTR1)                | 7.00E-236 |
| T2-L2 | blue | Csa1G181360 | 1.875 | 0.001947    | Transport                    | non-intrinsic ABC protein 9 (NAP9)                            | 3.00E-156 |
| T2-L2 | blue | Csa3G154410 | 2.05  | 1.63E-10    | Not assigned                 | unknown                                                       |           |
| T2-L2 | blue | Csa3G183950 | 2.092 | 0.0004285   | Abiotic stress               | Heat shock protein 83                                         | 0.00E+00  |
| T2-L2 | blue | Csa2G296090 | 2.143 | 2.44E-04    | Not assigned                 | unknown                                                       |           |
| T2-L2 | blue | Csa7G291720 | 2.169 | 0.006566    | Lipid metabolism             | Choline kinase                                                | 4.00E-133 |
| T2-L2 | blue | Csa2G427310 | 2.238 | 0.007581    | Transcription factor         | MYB domain protein 73 (MYB73)                                 | 1.00E-88  |
| T2-L2 | blue | Csa3G881750 | 2.24  | 0.009561    | Lipid metabolism             | PR5-like receptor kinase (PR5K)                               | 4.00E-154 |
| T2-L2 | blue | Csa5G589260 | 2.243 | 0           | Amino acid metabolism        | O-acetylserine(thiol) lyase (OAS-TL)                          | 4.00E-162 |
| T2-L2 | blue | Csa3G733350 | 2.317 | 0.00004435  | Cell organization            | RHO guanyl-nucleotide exchange factor 11 (ROPGEF11)           | 9.00E-41  |
| T2-L2 | blue | Csa2G004690 | 2.522 | 0.000004593 | Transcription factor         | Heat shock transcription factor C1 (HSFC1)                    | 5.00E-67  |
| T2-L2 | blue | Csa7G387690 | 2.631 | 0.000001654 | Transport                    | Sulfate transporter 3;1 (SULTR 3;1)                           | 3.00E-307 |
| T2-L2 | blue | Csa1G008520 | 2.771 | 0.00804     | Transport                    | Plasma membrane proton ATPase 4 (HA4)                         | 0.00E+00  |
| T2-L2 | blue | Csa6G514850 | 3.048 | 0.00009803  | Miscellaneous                | Cytochrome P450 family 77 subfamily B polypeptide 1 (CYP77B1) | 1.00E-241 |
| T2-L2 | blue | Csa5G604150 | 3.14  | 0.01        | Redox                        | Thioredoxin 2 (TRX2)                                          |           |
| T2-L2 | blue | Csa5G223070 | 3.216 | 0.003151    | Transcription factor         | WRKY DNA-binding protein 54 (WRKY54)                          | 3.00E-96  |
| T2-L2 | blue | Csa2G359890 | 3.289 | 3.70E-03    | Not assigned                 | unknown                                                       |           |
| T2-L2 | blue | Csa1G596520 | 3.4   | 0.0002165   | Protein degradation          | Cystein proteinases superfamily protein                       | 2.00E-168 |
| T2-L2 | blue | Csa7G395800 | 3.415 | 0.001823    | Miscellaneous                | Glutathione S-transferase phi 8 (GSTF8)                       | 3.00E-82  |
| T2-L2 | blue | Csa3G119700 | 3.575 | 0.00005376  | Transcription factor         | WRKY DNA-binding protein 53 (WRKY53)                          | 1.00E-102 |
| T2-L2 | blue | Csa6G381850 | 3.831 | 0.001156    | Transport                    | Amino acid permease 3 (AAP3)                                  | 2.00E-234 |
| T2-L2 | blue | Csa1G033160 | 4.495 | 0.006049    | Miscellaneous                | Glutathione S-transferase tau 9 (GSTU9)                       | 3.00E-68  |
| T2-L2 | blue | Csa6G486960 | 4.496 | 0.000002502 | Transcription factor         | WRKY DNA-binding protein 51 (WRKY51)                          | 1.00E-36  |
| T2-L2 | blue | Csa2G058620 | 5.345 | 0.003945    | Abiotic stress               | DNAJ heat shock N-terminal domain-containing protein          | 2.00E-137 |

Supplementary Table 1 (Continued)

|       |      |             |       |             |                              |                                                               |           |
|-------|------|-------------|-------|-------------|------------------------------|---------------------------------------------------------------|-----------|
| T2-L2 | blue | Csa1G574970 | 1.827 | 1.18E-05    | Major CHO metabolism         | Hexokinase 2 (HXK2)                                           | 7.00E-51  |
| T2-L2 | blue | Csa4G618520 | 1.837 | 0.0001765   | Biodegradation of xenobiotic | UDP glycosyltransferase (UGT)                                 | 1.00E-132 |
| T2-L2 | blue | Csa2G003610 | 1.841 | 0.0003098   | Lipid metabolism             | Abnormal inflorescence meristem (AIM1)                        | 3.00E-294 |
| T2-L2 | blue | Csa3G730930 | 1.847 | 0.00004243  | Transport                    | Ammonium transporter 2 (AMT2)                                 | 8E-220    |
| T2-L2 | blue | Csa6G493850 | 1.86  | 1.50E-05    | Not assigned                 | unknown                                                       |           |
| T2-L2 | blue | Csa3G159420 | 1.871 | 1.61E-03    | Not assigned                 | unknown                                                       |           |
| T2-L2 | blue | Csa1G528610 | 1.874 | 0.00435     | Lipid metabolism             | Thylakoid membrane anion transporter 1 (ANTR1)                | 7.00E-236 |
| T2-L2 | blue | Csa1G181360 | 1.875 | 0.001947    | Transport                    | non-intrinsic ABC protein 9 (NAP9)                            | 3.00E-156 |
| T2-L2 | blue | Csa3G154410 | 2.05  | 1.63E-10    | Not assigned                 | unknown                                                       |           |
| T2-L2 | blue | Csa3G183950 | 2.092 | 0.0004285   | Abiotic stress               | Heat shock protein 83                                         | 0.00E+00  |
| T2-L2 | blue | Csa2G296090 | 2.143 | 2.44E-04    | Not assigned                 | unknown                                                       |           |
| T2-L2 | blue | Csa7G291720 | 2.169 | 0.006566    | Lipid metabolism             | Choline kinase                                                | 4.00E-133 |
| T2-L2 | blue | Csa2G427310 | 2.238 | 0.007581    | Transcription factor         | MYB domain protein 73 (MYB73)                                 | 1.00E-88  |
| T2-L2 | blue | Csa3G881750 | 2.24  | 0.009561    | Lipid metabolism             | PR5-like receptor kinase (PR5K)                               | 4.00E-154 |
| T2-L2 | blue | Csa5G589260 | 2.243 | 0           | Amino acid metabolism        | O-acetylserine(thiol) lyase (OAS-TL)                          | 4.00E-162 |
| T2-L2 | blue | Csa3G733350 | 2.317 | 0.00004435  | Cell organization            | RHO guanyl-nucleotide exchange factor 11 (ROPGEF11)           | 9.00E-41  |
| T2-L2 | blue | Csa2G004690 | 2.522 | 0.000004593 | Transcription factor         | Heat shock transcription factor C1 (HSFC1)                    | 5.00E-67  |
| T2-L2 | blue | Csa7G387690 | 2.631 | 0.000001654 | Transport                    | Sulfate transporter 3;1 (SULTR 3;1)                           | 3.00E-307 |
| T2-L2 | blue | Csa1G008520 | 2.771 | 0.00804     | Transport                    | Plasma membrane proton ATPase 4 (HA4)                         | 0.00E+00  |
| T2-L2 | blue | Csa6G514850 | 3.048 | 0.00009803  | Miscellaneous                | Cytochrome P450 family 77 subfamily B polypeptide 1 (CYP77B1) | 1.00E-241 |
| T2-L2 | blue | Csa5G604150 | 3.14  | 0.01        | Redox                        | Thioredoxin 2 (TRX2)                                          |           |
| T2-L2 | blue | Csa5G223070 | 3.216 | 0.003151    | Transcription factor         | WRKY DNA-binding protein 54 (WRKY54)                          | 3.00E-96  |
| T2-L2 | blue | Csa2G359890 | 3.289 | 3.70E-03    | Not assigned                 | unknown                                                       |           |
| T2-L2 | blue | Csa1G596520 | 3.4   | 0.0002165   | Protein degradation          | Cystein proteinases superfamily protein                       | 2.00E-168 |
| T2-L2 | blue | Csa7G395800 | 3.415 | 0.001823    | Miscellaneous                | Glutathione S-transferase phi 8 (GSTF8)                       | 3.00E-82  |
| T2-L2 | blue | Csa3G119700 | 3.575 | 0.00005376  | Transcription factor         | WRKY DNA-binding protein 53 (WRKY53)                          | 1.00E-102 |
| T2-L2 | blue | Csa6G381850 | 3.831 | 0.001156    | Transport                    | Amino acid permease 3 (AAP3)                                  | 2.00E-234 |
| T2-L2 | blue | Csa1G033160 | 4.495 | 0.006049    | Miscellaneous                | Glutathione S-transferase tau 9 (GSTU9)                       | 3.00E-68  |
| T2-L2 | blue | Csa6G486960 | 4.496 | 0.000002502 | Transcription factor         | WRKY DNA-binding protein 51 (WRKY51)                          | 1.00E-36  |
| T2-L2 | blue | Csa2G058620 | 5.345 | 0.003945    | Abiotic stress               | DNAJ heat shock N-terminal domain-containing protein          | 2.00E-137 |

Supplementary Table 1 (Continued)

|       |      |             |       |             |                              |                                                               |           |
|-------|------|-------------|-------|-------------|------------------------------|---------------------------------------------------------------|-----------|
| T2-L2 | blue | Csa1G574970 | 1.827 | 1.18E-05    | Major CHO metabolism         | Hexokinase 2 (HXK2)                                           | 7.00E-51  |
| T2-L2 | blue | Csa4G618520 | 1.837 | 0.0001765   | Biodegradation of xenobiotic | UDP glycosyltransferase (UGT)                                 | 1.00E-132 |
| T2-L2 | blue | Csa2G003610 | 1.841 | 0.0003098   | Lipid metabolism             | Abnormal inflorescence meristem (AIM1)                        | 3.00E-294 |
| T2-L2 | blue | Csa3G730930 | 1.847 | 0.00004243  | Transport                    | Ammonium transporter 2 (AMT2)                                 | 8E-220    |
| T2-L2 | blue | Csa6G493850 | 1.86  | 1.50E-05    | Not assigned                 | unknown                                                       |           |
| T2-L2 | blue | Csa3G159420 | 1.871 | 1.61E-03    | Not assigned                 | unknown                                                       |           |
| T2-L2 | blue | Csa1G528610 | 1.874 | 0.00435     | Lipid metabolism             | Thylakoid membrane anion transporter 1 (ANTR1)                | 7.00E-236 |
| T2-L2 | blue | Csa1G181360 | 1.875 | 0.001947    | Transport                    | non-intrinsic ABC protein 9 (NAP9)                            | 3.00E-156 |
| T2-L2 | blue | Csa3G154410 | 2.05  | 1.63E-10    | Not assigned                 | unknown                                                       |           |
| T2-L2 | blue | Csa3G183950 | 2.092 | 0.0004285   | Abiotic stress               | Heat shock protein 83                                         | 0.00E+00  |
| T2-L2 | blue | Csa2G296090 | 2.143 | 2.44E-04    | Not assigned                 | unknown                                                       |           |
| T2-L2 | blue | Csa7G291720 | 2.169 | 0.006566    | Lipid metabolism             | Choline kinase                                                | 4.00E-133 |
| T2-L2 | blue | Csa2G427310 | 2.238 | 0.007581    | Transcription factor         | MYB domain protein 73 (MYB73)                                 | 1.00E-88  |
| T2-L2 | blue | Csa3G881750 | 2.24  | 0.009561    | Lipid metabolism             | PR5-like receptor kinase (PR5K)                               | 4.00E-154 |
| T2-L2 | blue | Csa5G589260 | 2.243 | 0           | Amino acid metabolism        | O-acetylserine(thiol) lyase (OAS-TL)                          | 4.00E-162 |
| T2-L2 | blue | Csa3G733350 | 2.317 | 0.00004435  | Cell organization            | RHO guanyl-nucleotide exchange factor 11 (ROPGEF11)           | 9.00E-41  |
| T2-L2 | blue | Csa2G004690 | 2.522 | 0.000004593 | Transcription factor         | Heat shock transcription factor C1 (HSFC1)                    | 5.00E-67  |
| T2-L2 | blue | Csa7G387690 | 2.631 | 0.000001654 | Transport                    | Sulfate transporter 3;1 (SULTR 3;1)                           | 3.00E-307 |
| T2-L2 | blue | Csa1G008520 | 2.771 | 0.00804     | Transport                    | Plasma membrane proton ATPase 4 (HA4)                         | 0.00E+00  |
| T2-L2 | blue | Csa6G514850 | 3.048 | 0.00009803  | Miscellaneous                | Cytochrome P450 family 77 subfamily B polypeptide 1 (CYP77B1) | 1.00E-241 |
| T2-L2 | blue | Csa5G604150 | 3.14  | 0.01        | Redox                        | Thioredoxin 2 (TRX2)                                          |           |
| T2-L2 | blue | Csa5G223070 | 3.216 | 0.003151    | Transcription factor         | WRKY DNA-binding protein 54 (WRKY54)                          | 3.00E-96  |
| T2-L2 | blue | Csa2G359890 | 3.289 | 3.70E-03    | Not assigned                 | unknown                                                       |           |
| T2-L2 | blue | Csa1G596520 | 3.4   | 0.0002165   | Protein degradation          | Cystein proteinases superfamily protein                       | 2.00E-168 |
| T2-L2 | blue | Csa7G395800 | 3.415 | 0.001823    | Miscellaneous                | Glutathione S-transferase phi 8 (GSTF8)                       | 3.00E-82  |
| T2-L2 | blue | Csa3G119700 | 3.575 | 0.00005376  | Transcription factor         | WRKY DNA-binding protein 53 (WRKY53)                          | 1.00E-102 |
| T2-L2 | blue | Csa6G381850 | 3.831 | 0.001156    | Transport                    | Amino acid permease 3 (AAP3)                                  | 2.00E-234 |
| T2-L2 | blue | Csa1G033160 | 4.495 | 0.006049    | Miscellaneous                | Glutathione S-transferase tau 9 (GSTU9)                       | 3.00E-68  |
| T2-L2 | blue | Csa6G486960 | 4.496 | 0.000002502 | Transcription factor         | WRKY DNA-binding protein 51 (WRKY51)                          | 1.00E-36  |
| T2-L2 | blue | Csa2G058620 | 5.345 | 0.003945    | Abiotic stress               | DNAJ heat shock N-terminal domain-containing protein          | 2.00E-137 |



Supplementary Table 1 (Continued)

|       |      |             |       |             |                              |                                                               |           |
|-------|------|-------------|-------|-------------|------------------------------|---------------------------------------------------------------|-----------|
| T2-L2 | blue | Csa1G574970 | 1.827 | 1.18E-05    | Major CHO metabolism         | Hexokinase 2 (HXK2)                                           | 7.00E-51  |
| T2-L2 | blue | Csa4G618520 | 1.837 | 0.0001765   | Biodegradation of xenobiotic | UDP glycosyltransferase (UGT)                                 | 1.00E-132 |
| T2-L2 | blue | Csa2G003610 | 1.841 | 0.0003098   | Lipid metabolism             | Abnormal inflorescence meristem (AIM1)                        | 3.00E-294 |
| T2-L2 | blue | Csa3G730930 | 1.847 | 0.00004243  | Transport                    | Ammonium transporter 2 (AMT2)                                 | 8E-220    |
| T2-L2 | blue | Csa6G493850 | 1.86  | 1.50E-05    | Not assigned                 | unknown                                                       |           |
| T2-L2 | blue | Csa3G159420 | 1.871 | 1.61E-03    | Not assigned                 | unknown                                                       |           |
| T2-L2 | blue | Csa1G528610 | 1.874 | 0.00435     | Lipid metabolism             | Thylakoid membrane anion transporter 1 (ANTR1)                | 7.00E-236 |
| T2-L2 | blue | Csa1G181360 | 1.875 | 0.001947    | Transport                    | non-intrinsic ABC protein 9 (NAP9)                            | 3.00E-156 |
| T2-L2 | blue | Csa3G154410 | 2.05  | 1.63E-10    | Not assigned                 | unknown                                                       |           |
| T2-L2 | blue | Csa3G183950 | 2.092 | 0.0004285   | Abiotic stress               | Heat shock protein 83                                         | 0.00E+00  |
| T2-L2 | blue | Csa2G296090 | 2.143 | 2.44E-04    | Not assigned                 | unknown                                                       |           |
| T2-L2 | blue | Csa7G291720 | 2.169 | 0.006566    | Lipid metabolism             | Choline kinase                                                | 4.00E-133 |
| T2-L2 | blue | Csa2G427310 | 2.238 | 0.007581    | Transcription factor         | MYB domain protein 73 (MYB73)                                 | 1.00E-88  |
| T2-L2 | blue | Csa3G881750 | 2.24  | 0.009561    | Lipid metabolism             | PR5-like receptor kinase (PR5K)                               | 4.00E-154 |
| T2-L2 | blue | Csa5G589260 | 2.243 | 0           | Amino acid metabolism        | O-acetylserine(thiol) lyase (OAS-TL)                          | 4.00E-162 |
| T2-L2 | blue | Csa3G733350 | 2.317 | 0.00004435  | Cell organization            | RHO guanyl-nucleotide exchange factor 11 (ROPGEF11)           | 9.00E-41  |
| T2-L2 | blue | Csa2G004690 | 2.522 | 0.000004593 | Transcription factor         | Heat shock transcription factor C1 (HSFC1)                    | 5.00E-67  |
| T2-L2 | blue | Csa7G387690 | 2.631 | 0.000001654 | Transport                    | Sulfate transporter 3;1 (SULTR 3;1)                           | 3.00E-307 |
| T2-L2 | blue | Csa1G008520 | 2.771 | 0.00804     | Transport                    | Plasma membrane proton ATPase 4 (HA4)                         | 0.00E+00  |
| T2-L2 | blue | Csa6G514850 | 3.048 | 0.00009803  | Miscellaneous                | Cytochrome P450 family 77 subfamily B polypeptide 1 (CYP77B1) | 1.00E-241 |
| T2-L2 | blue | Csa5G604150 | 3.14  | 0.01        | Redox                        | Thioredoxin 2 (TRX2)                                          |           |
| T2-L2 | blue | Csa5G223070 | 3.216 | 0.003151    | Transcription factor         | WRKY DNA-binding protein 54 (WRKY54)                          | 3.00E-96  |
| T2-L2 | blue | Csa2G359890 | 3.289 | 3.70E-03    | Not assigned                 | unknown                                                       |           |
| T2-L2 | blue | Csa1G596520 | 3.4   | 0.0002165   | Protein degradation          | Cystein proteinases superfamily protein                       | 2.00E-168 |
| T2-L2 | blue | Csa7G395800 | 3.415 | 0.001823    | Miscellaneous                | Glutathione S-transferase phi 8 (GSTF8)                       | 3.00E-82  |
| T2-L2 | blue | Csa3G119700 | 3.575 | 0.00005376  | Transcription factor         | WRKY DNA-binding protein 53 (WRKY53)                          | 1.00E-102 |
| T2-L2 | blue | Csa6G381850 | 3.831 | 0.001156    | Transport                    | Amino acid permease 3 (AAP3)                                  | 2.00E-234 |
| T2-L2 | blue | Csa1G033160 | 4.495 | 0.006049    | Miscellaneous                | Glutathione S-transferase tau 9 (GSTU9)                       | 3.00E-68  |
| T2-L2 | blue | Csa6G486960 | 4.496 | 0.000002502 | Transcription factor         | WRKY DNA-binding protein 51 (WRKY51)                          | 1.00E-36  |
| T2-L2 | blue | Csa2G058620 | 5.345 | 0.003945    | Abiotic stress               | DNAJ heat shock N-terminal domain-containing protein          | 2.00E-137 |

Supplementary Table 1 (Continued)

|       |      |             |       |             |                              |                                                               |           |
|-------|------|-------------|-------|-------------|------------------------------|---------------------------------------------------------------|-----------|
| T2-L2 | blue | Csa1G574970 | 1.827 | 1.18E-05    | Major CHO metabolism         | Hexokinase 2 (HXK2)                                           | 7.00E-51  |
| T2-L2 | blue | Csa4G618520 | 1.837 | 0.0001765   | Biodegradation of xenobiotic | UDP glycosyltransferase (UGT)                                 | 1.00E-132 |
| T2-L2 | blue | Csa2G003610 | 1.841 | 0.0003098   | Lipid metabolism             | Abnormal inflorescence meristem (AIM1)                        | 3.00E-294 |
| T2-L2 | blue | Csa3G730930 | 1.847 | 0.00004243  | Transport                    | Ammonium transporter 2 (AMT2)                                 | 8E-220    |
| T2-L2 | blue | Csa6G493850 | 1.86  | 1.50E-05    | Not assigned                 | unknown                                                       |           |
| T2-L2 | blue | Csa3G159420 | 1.871 | 1.61E-03    | Not assigned                 | unknown                                                       |           |
| T2-L2 | blue | Csa1G528610 | 1.874 | 0.00435     | Lipid metabolism             | Thylakoid membrane anion transporter 1 (ANTR1)                | 7.00E-236 |
| T2-L2 | blue | Csa1G181360 | 1.875 | 0.001947    | Transport                    | non-intrinsic ABC protein 9 (NAP9)                            | 3.00E-156 |
| T2-L2 | blue | Csa3G154410 | 2.05  | 1.63E-10    | Not assigned                 | unknown                                                       |           |
| T2-L2 | blue | Csa3G183950 | 2.092 | 0.0004285   | Abiotic stress               | Heat shock protein 83                                         | 0.00E+00  |
| T2-L2 | blue | Csa2G296090 | 2.143 | 2.44E-04    | Not assigned                 | unknown                                                       |           |
| T2-L2 | blue | Csa7G291720 | 2.169 | 0.006566    | Lipid metabolism             | Choline kinase                                                | 4.00E-133 |
| T2-L2 | blue | Csa2G427310 | 2.238 | 0.007581    | Transcription factor         | MYB domain protein 73 (MYB73)                                 | 1.00E-88  |
| T2-L2 | blue | Csa3G881750 | 2.24  | 0.009561    | Lipid metabolism             | PR5-like receptor kinase (PR5K)                               | 4.00E-154 |
| T2-L2 | blue | Csa5G589260 | 2.243 | 0           | Amino acid metabolism        | O-acetylserine(thiol) lyase (OAS-TL)                          | 4.00E-162 |
| T2-L2 | blue | Csa3G733350 | 2.317 | 0.00004435  | Cell organization            | RHO guanyl-nucleotide exchange factor 11 (ROPGEF11)           | 9.00E-41  |
| T2-L2 | blue | Csa2G004690 | 2.522 | 0.000004593 | Transcription factor         | Heat shock transcription factor C1 (HSFC1)                    | 5.00E-67  |
| T2-L2 | blue | Csa7G387690 | 2.631 | 0.000001654 | Transport                    | Sulfate transporter 3;1 (SULTR 3;1)                           | 3.00E-307 |
| T2-L2 | blue | Csa1G008520 | 2.771 | 0.00804     | Transport                    | Plasma membrane proton ATPase 4 (HA4)                         | 0.00E+00  |
| T2-L2 | blue | Csa6G514850 | 3.048 | 0.00009803  | Miscellaneous                | Cytochrome P450 family 77 subfamily B polypeptide 1 (CYP77B1) | 1.00E-241 |
| T2-L2 | blue | Csa5G604150 | 3.14  | 0.01        | Redox                        | Thioredoxin 2 (TRX2)                                          |           |
| T2-L2 | blue | Csa5G223070 | 3.216 | 0.003151    | Transcription factor         | WRKY DNA-binding protein 54 (WRKY54)                          | 3.00E-96  |
| T2-L2 | blue | Csa2G359890 | 3.289 | 3.70E-03    | Not assigned                 | unknown                                                       |           |
| T2-L2 | blue | Csa1G596520 | 3.4   | 0.0002165   | Protein degradation          | Cystein proteinases superfamily protein                       | 2.00E-168 |
| T2-L2 | blue | Csa7G395800 | 3.415 | 0.001823    | Miscellaneous                | Glutathione S-transferase phi 8 (GSTF8)                       | 3.00E-82  |
| T2-L2 | blue | Csa3G119700 | 3.575 | 0.00005376  | Transcription factor         | WRKY DNA-binding protein 53 (WRKY53)                          | 1.00E-102 |
| T2-L2 | blue | Csa6G381850 | 3.831 | 0.001156    | Transport                    | Amino acid permease 3 (AAP3)                                  | 2.00E-234 |
| T2-L2 | blue | Csa1G033160 | 4.495 | 0.006049    | Miscellaneous                | Glutathione S-transferase tau 9 (GSTU9)                       | 3.00E-68  |
| T2-L2 | blue | Csa6G486960 | 4.496 | 0.000002502 | Transcription factor         | WRKY DNA-binding protein 51 (WRKY51)                          | 1.00E-36  |
| T2-L2 | blue | Csa2G058620 | 5.345 | 0.003945    | Abiotic stress               | DNAJ heat shock N-terminal domain-containing protein          | 2.00E-137 |

Supplementary Table 1 (Continued)

|       |      |             |       |             |                              |                                                               |           |
|-------|------|-------------|-------|-------------|------------------------------|---------------------------------------------------------------|-----------|
| T2-L2 | blue | Csa1G574970 | 1.827 | 1.18E-05    | Major CHO metabolism         | Hexokinase 2 (HXK2)                                           | 7.00E-51  |
| T2-L2 | blue | Csa4G618520 | 1.837 | 0.0001765   | Biodegradation of xenobiotic | UDP glycosyltransferase (UGT)                                 | 1.00E-132 |
| T2-L2 | blue | Csa2G003610 | 1.841 | 0.0003098   | Lipid metabolism             | Abnormal inflorescence meristem (AIM1)                        | 3.00E-294 |
| T2-L2 | blue | Csa3G730930 | 1.847 | 0.00004243  | Transport                    | Ammonium transporter 2 (AMT2)                                 | 8E-220    |
| T2-L2 | blue | Csa6G493850 | 1.86  | 1.50E-05    | Not assigned                 | unknown                                                       |           |
| T2-L2 | blue | Csa3G159420 | 1.871 | 1.61E-03    | Not assigned                 | unknown                                                       |           |
| T2-L2 | blue | Csa1G528610 | 1.874 | 0.00435     | Lipid metabolism             | Thylakoid membrane anion transporter 1 (ANTR1)                | 7.00E-236 |
| T2-L2 | blue | Csa1G181360 | 1.875 | 0.001947    | Transport                    | non-intrinsic ABC protein 9 (NAP9)                            | 3.00E-156 |
| T2-L2 | blue | Csa3G154410 | 2.05  | 1.63E-10    | Not assigned                 | unknown                                                       |           |
| T2-L2 | blue | Csa3G183950 | 2.092 | 0.0004285   | Abiotic stress               | Heat shock protein 83                                         | 0.00E+00  |
| T2-L2 | blue | Csa2G296090 | 2.143 | 2.44E-04    | Not assigned                 | unknown                                                       |           |
| T2-L2 | blue | Csa7G291720 | 2.169 | 0.006566    | Lipid metabolism             | Choline kinase                                                | 4.00E-133 |
| T2-L2 | blue | Csa2G427310 | 2.238 | 0.007581    | Transcription factor         | MYB domain protein 73 (MYB73)                                 | 1.00E-88  |
| T2-L2 | blue | Csa3G881750 | 2.24  | 0.009561    | Lipid metabolism             | PR5-like receptor kinase (PR5K)                               | 4.00E-154 |
| T2-L2 | blue | Csa5G589260 | 2.243 | 0           | Amino acid metabolism        | O-acetylserine(thiol) lyase (OAS-TL)                          | 4.00E-162 |
| T2-L2 | blue | Csa3G733350 | 2.317 | 0.00004435  | Cell organization            | RHO guanyl-nucleotide exchange factor 11 (ROPGEF11)           | 9.00E-41  |
| T2-L2 | blue | Csa2G004690 | 2.522 | 0.000004593 | Transcription factor         | Heat shock transcription factor C1 (HSFC1)                    | 5.00E-67  |
| T2-L2 | blue | Csa7G387690 | 2.631 | 0.000001654 | Transport                    | Sulfate transporter 3;1 (SULTR 3;1)                           | 3.00E-307 |
| T2-L2 | blue | Csa1G008520 | 2.771 | 0.00804     | Transport                    | Plasma membrane proton ATPase 4 (HA4)                         | 0.00E+00  |
| T2-L2 | blue | Csa6G514850 | 3.048 | 0.00009803  | Miscellaneous                | Cytochrome P450 family 77 subfamily B polypeptide 1 (CYP77B1) | 1.00E-241 |
| T2-L2 | blue | Csa5G604150 | 3.14  | 0.01        | Redox                        | Thioredoxin 2 (TRX2)                                          |           |
| T2-L2 | blue | Csa5G223070 | 3.216 | 0.003151    | Transcription factor         | WRKY DNA-binding protein 54 (WRKY54)                          | 3.00E-96  |
| T2-L2 | blue | Csa2G359890 | 3.289 | 3.70E-03    | Not assigned                 | unknown                                                       |           |
| T2-L2 | blue | Csa1G596520 | 3.4   | 0.0002165   | Protein degradation          | Cystein proteinases superfamily protein                       | 2.00E-168 |
| T2-L2 | blue | Csa7G395800 | 3.415 | 0.001823    | Miscellaneous                | Glutathione S-transferase phi 8 (GSTF8)                       | 3.00E-82  |
| T2-L2 | blue | Csa3G119700 | 3.575 | 0.00005376  | Transcription factor         | WRKY DNA-binding protein 53 (WRKY53)                          | 1.00E-102 |
| T2-L2 | blue | Csa6G381850 | 3.831 | 0.001156    | Transport                    | Amino acid permease 3 (AAP3)                                  | 2.00E-234 |
| T2-L2 | blue | Csa1G033160 | 4.495 | 0.006049    | Miscellaneous                | Glutathione S-transferase tau 9 (GSTU9)                       | 3.00E-68  |
| T2-L2 | blue | Csa6G486960 | 4.496 | 0.000002502 | Transcription factor         | WRKY DNA-binding protein 51 (WRKY51)                          | 1.00E-36  |
| T2-L2 | blue | Csa2G058620 | 5.345 | 0.003945    | Abiotic stress               | DNAJ heat shock N-terminal domain-containing protein          | 2.00E-137 |

Supplementary Table 1 (Continued)

|       |      |             |       |             |                              |                                                               |           |
|-------|------|-------------|-------|-------------|------------------------------|---------------------------------------------------------------|-----------|
| T2-L2 | blue | Csa1G574970 | 1.827 | 1.18E-05    | Major CHO metabolism         | Hexokinase 2 (HXK2)                                           | 7.00E-51  |
| T2-L2 | blue | Csa4G618520 | 1.837 | 0.0001765   | Biodegradation of xenobiotic | UDP glycosyltransferase (UGT)                                 | 1.00E-132 |
| T2-L2 | blue | Csa2G003610 | 1.841 | 0.0003098   | Lipid metabolism             | Abnormal inflorescence meristem (AIM1)                        | 3.00E-294 |
| T2-L2 | blue | Csa3G730930 | 1.847 | 0.00004243  | Transport                    | Ammonium transporter 2 (AMT2)                                 | 8E-220    |
| T2-L2 | blue | Csa6G493850 | 1.86  | 1.50E-05    | Not assigned                 | unknown                                                       |           |
| T2-L2 | blue | Csa3G159420 | 1.871 | 1.61E-03    | Not assigned                 | unknown                                                       |           |
| T2-L2 | blue | Csa1G528610 | 1.874 | 0.00435     | Lipid metabolism             | Thylakoid membrane anion transporter 1 (ANTR1)                | 7.00E-236 |
| T2-L2 | blue | Csa1G181360 | 1.875 | 0.001947    | Transport                    | non-intrinsic ABC protein 9 (NAP9)                            | 3.00E-156 |
| T2-L2 | blue | Csa3G154410 | 2.05  | 1.63E-10    | Not assigned                 | unknown                                                       |           |
| T2-L2 | blue | Csa3G183950 | 2.092 | 0.0004285   | Abiotic stress               | Heat shock protein 83                                         | 0.00E+00  |
| T2-L2 | blue | Csa2G296090 | 2.143 | 2.44E-04    | Not assigned                 | unknown                                                       |           |
| T2-L2 | blue | Csa7G291720 | 2.169 | 0.006566    | Lipid metabolism             | Choline kinase                                                | 4.00E-133 |
| T2-L2 | blue | Csa2G427310 | 2.238 | 0.007581    | Transcription factor         | MYB domain protein 73 (MYB73)                                 | 1.00E-88  |
| T2-L2 | blue | Csa3G881750 | 2.24  | 0.009561    | Lipid metabolism             | PR5-like receptor kinase (PR5K)                               | 4.00E-154 |
| T2-L2 | blue | Csa5G589260 | 2.243 | 0           | Amino acid metabolism        | O-acetylserine(thiol) lyase (OAS-TL)                          | 4.00E-162 |
| T2-L2 | blue | Csa3G733350 | 2.317 | 0.00004435  | Cell organization            | RHO guanyl-nucleotide exchange factor 11 (ROPGEF11)           | 9.00E-41  |
| T2-L2 | blue | Csa2G004690 | 2.522 | 0.000004593 | Transcription factor         | Heat shock transcription factor C1 (HSFC1)                    | 5.00E-67  |
| T2-L2 | blue | Csa7G387690 | 2.631 | 0.000001654 | Transport                    | Sulfate transporter 3;1 (SULTR 3;1)                           | 3.00E-307 |
| T2-L2 | blue | Csa1G008520 | 2.771 | 0.00804     | Transport                    | Plasma membrane proton ATPase 4 (HA4)                         | 0.00E+00  |
| T2-L2 | blue | Csa6G514850 | 3.048 | 0.00009803  | Miscellaneous                | Cytochrome P450 family 77 subfamily B polypeptide 1 (CYP77B1) | 1.00E-241 |
| T2-L2 | blue | Csa5G604150 | 3.14  | 0.01        | Redox                        | Thioredoxin 2 (TRX2)                                          |           |
| T2-L2 | blue | Csa5G223070 | 3.216 | 0.003151    | Transcription factor         | WRKY DNA-binding protein 54 (WRKY54)                          | 3.00E-96  |
| T2-L2 | blue | Csa2G359890 | 3.289 | 3.70E-03    | Not assigned                 | unknown                                                       |           |
| T2-L2 | blue | Csa1G596520 | 3.4   | 0.0002165   | Protein degradation          | Cystein proteinases superfamily protein                       | 2.00E-168 |
| T2-L2 | blue | Csa7G395800 | 3.415 | 0.001823    | Miscellaneous                | Glutathione S-transferase phi 8 (GSTF8)                       | 3.00E-82  |
| T2-L2 | blue | Csa3G119700 | 3.575 | 0.00005376  | Transcription factor         | WRKY DNA-binding protein 53 (WRKY53)                          | 1.00E-102 |
| T2-L2 | blue | Csa6G381850 | 3.831 | 0.001156    | Transport                    | Amino acid permease 3 (AAP3)                                  | 2.00E-234 |
| T2-L2 | blue | Csa1G033160 | 4.495 | 0.006049    | Miscellaneous                | Glutathione S-transferase tau 9 (GSTU9)                       | 3.00E-68  |
| T2-L2 | blue | Csa6G486960 | 4.496 | 0.000002502 | Transcription factor         | WRKY DNA-binding protein 51 (WRKY51)                          | 1.00E-36  |
| T2-L2 | blue | Csa2G058620 | 5.345 | 0.003945    | Abiotic stress               | DNAJ heat shock N-terminal domain-containing protein          | 2.00E-137 |

Supplementary Table 1 (Continued)

|       |      |             |       |             |                              |                                                               |           |
|-------|------|-------------|-------|-------------|------------------------------|---------------------------------------------------------------|-----------|
| T2-L2 | blue | Csa1G574970 | 1.827 | 1.18E-05    | Major CHO metabolism         | Hexokinase 2 (HXK2)                                           | 7.00E-51  |
| T2-L2 | blue | Csa4G618520 | 1.837 | 0.0001765   | Biodegradation of xenobiotic | UDP glycosyltransferase (UGT)                                 | 1.00E-132 |
| T2-L2 | blue | Csa2G003610 | 1.841 | 0.0003098   | Lipid metabolism             | Abnormal inflorescence meristem (AIM1)                        | 3.00E-294 |
| T2-L2 | blue | Csa3G730930 | 1.847 | 0.00004243  | Transport                    | Ammonium transporter 2 (AMT2)                                 | 8E-220    |
| T2-L2 | blue | Csa6G493850 | 1.86  | 1.50E-05    | Not assigned                 | unknown                                                       |           |
| T2-L2 | blue | Csa3G159420 | 1.871 | 1.61E-03    | Not assigned                 | unknown                                                       |           |
| T2-L2 | blue | Csa1G528610 | 1.874 | 0.00435     | Lipid metabolism             | Thylakoid membrane anion transporter 1 (ANTR1)                | 7.00E-236 |
| T2-L2 | blue | Csa1G181360 | 1.875 | 0.001947    | Transport                    | non-intrinsic ABC protein 9 (NAP9)                            | 3.00E-156 |
| T2-L2 | blue | Csa3G154410 | 2.05  | 1.63E-10    | Not assigned                 | unknown                                                       |           |
| T2-L2 | blue | Csa3G183950 | 2.092 | 0.0004285   | Abiotic stress               | Heat shock protein 83                                         | 0.00E+00  |
| T2-L2 | blue | Csa2G296090 | 2.143 | 2.44E-04    | Not assigned                 | unknown                                                       |           |
| T2-L2 | blue | Csa7G291720 | 2.169 | 0.006566    | Lipid metabolism             | Choline kinase                                                | 4.00E-133 |
| T2-L2 | blue | Csa2G427310 | 2.238 | 0.007581    | Transcription factor         | MYB domain protein 73 (MYB73)                                 | 1.00E-88  |
| T2-L2 | blue | Csa3G881750 | 2.24  | 0.009561    | Lipid metabolism             | PR5-like receptor kinase (PR5K)                               | 4.00E-154 |
| T2-L2 | blue | Csa5G589260 | 2.243 | 0           | Amino acid metabolism        | O-acetylserine(thiol) lyase (OAS-TL)                          | 4.00E-162 |
| T2-L2 | blue | Csa3G733350 | 2.317 | 0.00004435  | Cell organization            | RHO guanyl-nucleotide exchange factor 11 (ROPGEF11)           | 9.00E-41  |
| T2-L2 | blue | Csa2G004690 | 2.522 | 0.000004593 | Transcription factor         | Heat shock transcription factor C1 (HSFC1)                    | 5.00E-67  |
| T2-L2 | blue | Csa7G387690 | 2.631 | 0.000001654 | Transport                    | Sulfate transporter 3;1 (SULTR 3;1)                           | 3.00E-307 |
| T2-L2 | blue | Csa1G008520 | 2.771 | 0.00804     | Transport                    | Plasma membrane proton ATPase 4 (HA4)                         | 0.00E+00  |
| T2-L2 | blue | Csa6G514850 | 3.048 | 0.00009803  | Miscellaneous                | Cytochrome P450 family 77 subfamily B polypeptide 1 (CYP77B1) | 1.00E-241 |
| T2-L2 | blue | Csa5G604150 | 3.14  | 0.01        | Redox                        | Thioredoxin 2 (TRX2)                                          |           |
| T2-L2 | blue | Csa5G223070 | 3.216 | 0.003151    | Transcription factor         | WRKY DNA-binding protein 54 (WRKY54)                          | 3.00E-96  |
| T2-L2 | blue | Csa2G359890 | 3.289 | 3.70E-03    | Not assigned                 | unknown                                                       |           |
| T2-L2 | blue | Csa1G596520 | 3.4   | 0.0002165   | Protein degradation          | Cystein proteinases superfamily protein                       | 2.00E-168 |
| T2-L2 | blue | Csa7G395800 | 3.415 | 0.001823    | Miscellaneous                | Glutathione S-transferase phi 8 (GSTF8)                       | 3.00E-82  |
| T2-L2 | blue | Csa3G119700 | 3.575 | 0.00005376  | Transcription factor         | WRKY DNA-binding protein 53 (WRKY53)                          | 1.00E-102 |
| T2-L2 | blue | Csa6G381850 | 3.831 | 0.001156    | Transport                    | Amino acid permease 3 (AAP3)                                  | 2.00E-234 |
| T2-L2 | blue | Csa1G033160 | 4.495 | 0.006049    | Miscellaneous                | Glutathione S-transferase tau 9 (GSTU9)                       | 3.00E-68  |
| T2-L2 | blue | Csa6G486960 | 4.496 | 0.000002502 | Transcription factor         | WRKY DNA-binding protein 51 (WRKY51)                          | 1.00E-36  |
| T2-L2 | blue | Csa2G058620 | 5.345 | 0.003945    | Abiotic stress               | DNAJ heat shock N-terminal domain-containing protein          | 2.00E-137 |

Supplementary Table 1 (Continued)

|       |      |             |       |             |                              |                                                               |           |
|-------|------|-------------|-------|-------------|------------------------------|---------------------------------------------------------------|-----------|
| T2-L2 | blue | Csa1G574970 | 1.827 | 1.18E-05    | Major CHO metabolism         | Hexokinase 2 (HXK2)                                           | 7.00E-51  |
| T2-L2 | blue | Csa4G618520 | 1.837 | 0.0001765   | Biodegradation of xenobiotic | UDP glycosyltransferase (UGT)                                 | 1.00E-132 |
| T2-L2 | blue | Csa2G003610 | 1.841 | 0.0003098   | Lipid metabolism             | Abnormal inflorescence meristem (AIM1)                        | 3.00E-294 |
| T2-L2 | blue | Csa3G730930 | 1.847 | 0.00004243  | Transport                    | Ammonium transporter 2 (AMT2)                                 | 8E-220    |
| T2-L2 | blue | Csa6G493850 | 1.86  | 1.50E-05    | Not assigned                 | unknown                                                       |           |
| T2-L2 | blue | Csa3G159420 | 1.871 | 1.61E-03    | Not assigned                 | unknown                                                       |           |
| T2-L2 | blue | Csa1G528610 | 1.874 | 0.00435     | Lipid metabolism             | Thylakoid membrane anion transporter 1 (ANTR1)                | 7.00E-236 |
| T2-L2 | blue | Csa1G181360 | 1.875 | 0.001947    | Transport                    | non-intrinsic ABC protein 9 (NAP9)                            | 3.00E-156 |
| T2-L2 | blue | Csa3G154410 | 2.05  | 1.63E-10    | Not assigned                 | unknown                                                       |           |
| T2-L2 | blue | Csa3G183950 | 2.092 | 0.0004285   | Abiotic stress               | Heat shock protein 83                                         | 0.00E+00  |
| T2-L2 | blue | Csa2G296090 | 2.143 | 2.44E-04    | Not assigned                 | unknown                                                       |           |
| T2-L2 | blue | Csa7G291720 | 2.169 | 0.006566    | Lipid metabolism             | Choline kinase                                                | 4.00E-133 |
| T2-L2 | blue | Csa2G427310 | 2.238 | 0.007581    | Transcription factor         | MYB domain protein 73 (MYB73)                                 | 1.00E-88  |
| T2-L2 | blue | Csa3G881750 | 2.24  | 0.009561    | Lipid metabolism             | PR5-like receptor kinase (PR5K)                               | 4.00E-154 |
| T2-L2 | blue | Csa5G589260 | 2.243 | 0           | Amino acid metabolism        | O-acetylserine(thiol) lyase (OAS-TL)                          | 4.00E-162 |
| T2-L2 | blue | Csa3G733350 | 2.317 | 0.00004435  | Cell organization            | RHO guanyl-nucleotide exchange factor 11 (ROPGEF11)           | 9.00E-41  |
| T2-L2 | blue | Csa2G004690 | 2.522 | 0.000004593 | Transcription factor         | Heat shock transcription factor C1 (HSFC1)                    | 5.00E-67  |
| T2-L2 | blue | Csa7G387690 | 2.631 | 0.000001654 | Transport                    | Sulfate transporter 3;1 (SULTR 3;1)                           | 3.00E-307 |
| T2-L2 | blue | Csa1G008520 | 2.771 | 0.00804     | Transport                    | Plasma membrane proton ATPase 4 (HA4)                         | 0.00E+00  |
| T2-L2 | blue | Csa6G514850 | 3.048 | 0.00009803  | Miscellaneous                | Cytochrome P450 family 77 subfamily B polypeptide 1 (CYP77B1) | 1.00E-241 |
| T2-L2 | blue | Csa5G604150 | 3.14  | 0.01        | Redox                        | Thioredoxin 2 (TRX2)                                          |           |
| T2-L2 | blue | Csa5G223070 | 3.216 | 0.003151    | Transcription factor         | WRKY DNA-binding protein 54 (WRKY54)                          | 3.00E-96  |
| T2-L2 | blue | Csa2G359890 | 3.289 | 3.70E-03    | Not assigned                 | unknown                                                       |           |
| T2-L2 | blue | Csa1G596520 | 3.4   | 0.0002165   | Protein degradation          | Cystein proteinases superfamily protein                       | 2.00E-168 |
| T2-L2 | blue | Csa7G395800 | 3.415 | 0.001823    | Miscellaneous                | Glutathione S-transferase phi 8 (GSTF8)                       | 3.00E-82  |
| T2-L2 | blue | Csa3G119700 | 3.575 | 0.00005376  | Transcription factor         | WRKY DNA-binding protein 53 (WRKY53)                          | 1.00E-102 |
| T2-L2 | blue | Csa6G381850 | 3.831 | 0.001156    | Transport                    | Amino acid permease 3 (AAP3)                                  | 2.00E-234 |
| T2-L2 | blue | Csa1G033160 | 4.495 | 0.006049    | Miscellaneous                | Glutathione S-transferase tau 9 (GSTU9)                       | 3.00E-68  |
| T2-L2 | blue | Csa6G486960 | 4.496 | 0.000002502 | Transcription factor         | WRKY DNA-binding protein 51 (WRKY51)                          | 1.00E-36  |
| T2-L2 | blue | Csa2G058620 | 5.345 | 0.003945    | Abiotic stress               | DNAJ heat shock N-terminal domain-containing protein          | 2.00E-137 |

Supplementary Table 1 (Continued)

|       |      |             |        |           |                                        |                                                                         |           |
|-------|------|-------------|--------|-----------|----------------------------------------|-------------------------------------------------------------------------|-----------|
| T2-L2 | blue | Csa3G064240 | 5.658  | 3.97E-13  | Not assigned                           | unknown                                                                 |           |
| T2-L2 | blue | Csa3G727990 | 6.451  | 4.501E-07 | Transcription factor                   | WRKY DNA-binding protein 70 (WRKY70)                                    | 4.00E-166 |
| T2-L2 | blue | Csa6G093640 | 7.096  | 0.003228  | Transcription factor                   | PCF (TCP)-domain family protein 20 (TCP20)                              | 6.00E-72  |
| T2-L2 | blue | Csa3G825080 | 7.272  | 0.003456  | Miscellaneous                          | Cytochrome P450 family 72 subfamily A polypeptide 8 (CYP72A8)           | 5.00E-38  |
| T2-L2 | blue | Csa1G002860 | 8.184  | 0.002006  | Signaling                              | Suppressor of BIR1 (SOBIR1)                                             | 9.00E-255 |
| T2-L2 | blue | Csa2G297180 | 12.788 | 0.0003204 | Transcription factor                   | WRKY DNA-binding protein 51 (WRKY51)                                    | 3.00E-51  |
| T2-L2 | blue | Csa7G037610 | 14.168 | 7.21E-03  | Not assigned                           | unknown                                                                 |           |
| T2-L2 | blue | Csa7G414490 | 17.197 | 0.001714  | Miscellaneous                          | NAD(P)-binding Rossmann-fold superfamily protein                        | 1.00E-84  |
| T2-L2 | blue | Csa1G007850 | 1.783  | 0.026     | Transcription factor                   | MYB-like DNA-binding domain protein                                     | 7.00E-61  |
| T2-L2 | blue | Csa1G022520 | 3.614  | 0.025     | Not assigned                           | unknown                                                                 | 2.00E-30  |
| T2-L2 | blue | Csa1G043040 | 1.212  | 0.027     | Transcription factor                   | Homeobox protein 22 (HB22)                                              | 3.00E-22  |
| T2-L2 | blue | Csa1G045650 | -3.2   | 1.04E-07  | Protein degradation                    | AAA-ATPase 1 (AATP1)                                                    | 1.00E-149 |
| T2-L2 | blue | Csa1G132110 | 1.644  | 0.015     | Not assigned                           | unknown                                                                 | 1.00E-43  |
| T2-L2 | blue | Csa1G164660 | -1.478 | 0.04      | Miscellaneous                          | Glycosyl hydrolase superfamily protein                                  | 6.00E-149 |
| T2-L2 | blue | Csa1G165230 | 1.466  | 0.016     | Transcription factor                   | NAC domain containing protein 90 (NAC090)                               | 8.00E-62  |
| T2-L2 | blue | Csa1G212830 | 1.554  | 0.025     | Secondary metabolism                   | 2-oxoglutarase (2OG) and Fe(II)-dependent oxygenase superfamily protein | 6.00E-92  |
| T2-L2 | blue | Csa1G523610 | 1.418  | 0.031     | Transcription factor                   | GRAS family transcription factor                                        | 1.00E-144 |
| T2-L2 | blue | Csa1G560830 | -4.342 | 1.61E-05  | RNA processing                         | RNA helicase 2                                                          | 2.00E-282 |
| T2-L2 | blue | Csa1G575160 | 1.173  | 0.027     | Transcription factor                   | SNF7 family protein                                                     | 7.00E-104 |
| T2-L2 | blue | Csa1G611290 | 1.417  | 0.014     | Miscellaneous                          | Beta glucosidase 15 (BGLU15)                                            | 9.00E-159 |
| T2-L2 | blue | Csa2G163170 | 1.75   | 0.014     | Transport                              | Ammonium transporter 1;1 (AMT1;1)                                       | 2.00E-241 |
| T2-L2 | blue | Csa2G287040 | 1.909  | 0.032     | Cell organization                      | Ankyrin repeat family protein                                           | 5.00E-14  |
| T2-L2 | blue | Csa2G345990 | 1.632  | 0.019     | Not assigned                           | Thioredoxin superfamily protein                                         | 5.00E-67  |
| T2-L2 | blue | Csa2G351820 | 1.889  | 0.031     | Protein targeting                      | Vacuolar-processing enzyme precursor (VPE)                              | 2.00E-219 |
| T2-L2 | blue | Csa2G358860 | 1.58   | 0.049     | Not assigned                           | unknown                                                                 |           |
| T2-L2 | blue | Csa2G359940 | 1.788  | 0         | Not assigned                           | unknown                                                                 |           |
| T2-L2 | blue | Csa2G360750 | 1.962  | 6.24E-03  | Not assigned                           | Transducing/WD40 repeat-like superfamily protein                        | 1.00E-141 |
| T2-L2 | blue | Csa2G423560 | 1.685  | 0.012     | Transcription factor                   | B-box type zinc finger family protein                                   | 5.00E-21  |
| T2-L2 | blue | Csa3G035840 | -3.171 | 3.41E-03  | Miscellaneous                          | receptor serine/threonine kinase                                        | 4.00E-19  |
| T2-L2 | blue | Csa3G061000 | 5.308  | 0.016     | Protein posttranslational modification | Calcium-binding EF-hand family protein                                  | 1.00E-85  |

Supplementary Table 1 (Continued)

|       |      |             |       |             |                              |                                                               |           |
|-------|------|-------------|-------|-------------|------------------------------|---------------------------------------------------------------|-----------|
| T2-L2 | blue | Csa1G574970 | 1.827 | 1.18E-05    | Major CHO metabolism         | Hexokinase 2 (HXK2)                                           | 7.00E-51  |
| T2-L2 | blue | Csa4G618520 | 1.837 | 0.0001765   | Biodegradation of xenobiotic | UDP glycosyltransferase (UGT)                                 | 1.00E-132 |
| T2-L2 | blue | Csa2G003610 | 1.841 | 0.0003098   | Lipid metabolism             | Abnormal inflorescence meristem (AIM1)                        | 3.00E-294 |
| T2-L2 | blue | Csa3G730930 | 1.847 | 0.00004243  | Transport                    | Ammonium transporter 2 (AMT2)                                 | 8E-220    |
| T2-L2 | blue | Csa6G493850 | 1.86  | 1.50E-05    | Not assigned                 | unknown                                                       |           |
| T2-L2 | blue | Csa3G159420 | 1.871 | 1.61E-03    | Not assigned                 | unknown                                                       |           |
| T2-L2 | blue | Csa1G528610 | 1.874 | 0.00435     | Lipid metabolism             | Thylakoid membrane anion transporter 1 (ANTR1)                | 7.00E-236 |
| T2-L2 | blue | Csa1G181360 | 1.875 | 0.001947    | Transport                    | non-intrinsic ABC protein 9 (NAP9)                            | 3.00E-156 |
| T2-L2 | blue | Csa3G154410 | 2.05  | 1.63E-10    | Not assigned                 | unknown                                                       |           |
| T2-L2 | blue | Csa3G183950 | 2.092 | 0.0004285   | Abiotic stress               | Heat shock protein 83                                         | 0.00E+00  |
| T2-L2 | blue | Csa2G296090 | 2.143 | 2.44E-04    | Not assigned                 | unknown                                                       |           |
| T2-L2 | blue | Csa7G291720 | 2.169 | 0.006566    | Lipid metabolism             | Choline kinase                                                | 4.00E-133 |
| T2-L2 | blue | Csa2G427310 | 2.238 | 0.007581    | Transcription factor         | MYB domain protein 73 (MYB73)                                 | 1.00E-88  |
| T2-L2 | blue | Csa3G881750 | 2.24  | 0.009561    | Lipid metabolism             | PR5-like receptor kinase (PR5K)                               | 4.00E-154 |
| T2-L2 | blue | Csa5G589260 | 2.243 | 0           | Amino acid metabolism        | O-acetylserine(thiol) lyase (OAS-TL)                          | 4.00E-162 |
| T2-L2 | blue | Csa3G733350 | 2.317 | 0.00004435  | Cell organization            | RHO guanyl-nucleotide exchange factor 11 (ROPGEF11)           | 9.00E-41  |
| T2-L2 | blue | Csa2G004690 | 2.522 | 0.000004593 | Transcription factor         | Heat shock transcription factor C1 (HSFC1)                    | 5.00E-67  |
| T2-L2 | blue | Csa7G387690 | 2.631 | 0.000001654 | Transport                    | Sulfate transporter 3;1 (SULTR 3;1)                           | 3.00E-307 |
| T2-L2 | blue | Csa1G008520 | 2.771 | 0.00804     | Transport                    | Plasma membrane proton ATPase 4 (HA4)                         | 0.00E+00  |
| T2-L2 | blue | Csa6G514850 | 3.048 | 0.00009803  | Miscellaneous                | Cytochrome P450 family 77 subfamily B polypeptide 1 (CYP77B1) | 1.00E-241 |
| T2-L2 | blue | Csa5G604150 | 3.14  | 0.01        | Redox                        | Thioredoxin 2 (TRX2)                                          |           |
| T2-L2 | blue | Csa5G223070 | 3.216 | 0.003151    | Transcription factor         | WRKY DNA-binding protein 54 (WRKY54)                          | 3.00E-96  |
| T2-L2 | blue | Csa2G359890 | 3.289 | 3.70E-03    | Not assigned                 | unknown                                                       |           |
| T2-L2 | blue | Csa1G596520 | 3.4   | 0.0002165   | Protein degradation          | Cystein proteinases superfamily protein                       | 2.00E-168 |
| T2-L2 | blue | Csa7G395800 | 3.415 | 0.001823    | Miscellaneous                | Glutathione S-transferase phi 8 (GSTF8)                       | 3.00E-82  |
| T2-L2 | blue | Csa3G119700 | 3.575 | 0.00005376  | Transcription factor         | WRKY DNA-binding protein 53 (WRKY53)                          | 1.00E-102 |
| T2-L2 | blue | Csa6G381850 | 3.831 | 0.001156    | Transport                    | Amino acid permease 3 (AAP3)                                  | 2.00E-234 |
| T2-L2 | blue | Csa1G033160 | 4.495 | 0.006049    | Miscellaneous                | Glutathione S-transferase tau 9 (GSTU9)                       | 3.00E-68  |
| T2-L2 | blue | Csa6G486960 | 4.496 | 0.000002502 | Transcription factor         | WRKY DNA-binding protein 51 (WRKY51)                          | 1.00E-36  |
| T2-L2 | blue | Csa2G058620 | 5.345 | 0.003945    | Abiotic stress               | DNAJ heat shock N-terminal domain-containing protein          | 2.00E-137 |



Supplementary Table 1 (Continued)

|       |      |             |        |          |                      |                                                                                     |           |
|-------|------|-------------|--------|----------|----------------------|-------------------------------------------------------------------------------------|-----------|
| T2-L2 | blue | Csa3G099650 | 1.434  | 3.40E-03 | Abiotic stress       | Wound-responsive family protein                                                     | 1.00E-17  |
| T2-L2 | blue | Csa3G145780 | 10.118 | 0.012    | Signaling            | Early light-inducible protein (ELIP1)                                               | 7.00E-55  |
| T2-L2 | blue | Csa3G146300 | 1.261  | 3.15E-05 | Metal handling       | Acireductone dioxygenase 2 (ARD2)                                                   | 1.00E-92  |
| T2-L2 | blue | Csa3G171820 | 1.309  | 0.023    | Hormone metabolism   | SAUR-like auxin-responsive protein family                                           | 1.00E-45  |
| T2-L2 | blue | Csa3G178520 | 1.315  | 3.66E-03 | Protein degradation  | Subtilase 1.3 (SBT1.3)                                                              | 0         |
| T2-L2 | blue | Csa3G181940 | 1.399  | 0.012    | Abiotic stress       | Heat stress transcription factor (Hsf) family                                       | 3.00E-55  |
| T2-L2 | blue | Csa3G182150 | -1.65  | 9.72E-06 | Signaling            | PAR1 protein                                                                        | 3.00E-55  |
| T2-L2 | blue | Csa3G239250 | -2.005 | 1.63E-04 | Not assigned         | unknown                                                                             |           |
| T2-L2 | blue | Csa3G316280 | 2.061  | 7.95E-07 | Transcription factor | Calcium-dependent lipid-binding (CaLB domain) family protein                        | 4.00E-64  |
| T2-L2 | blue | Csa3G319290 | 1.31   | 0.04     | Biotic stress        | Polyketide cyclase/dehydrase and lipid transport superfamily protein                | 3.00E-20  |
| T2-L2 | blue | Csa3G333840 | 3.405  | 6.16E-05 | Biotic stress        | MLP-like protein 34 (MLP34)                                                         | 3.00E-13  |
| T2-L2 | blue | Csa3G588450 | 1.584  | 0.047    | Protein synthesis    | Glucose hypersensitive 1 (GHS1)                                                     | 3.00E-45  |
| T2-L2 | blue | Csa3G646010 | 1.758  | 0.013    | Hormone metabolism   | Dormancy/auxin associated family protein                                            | 3.00E-15  |
| T2-L2 | blue | Csa3G646660 | 2.135  | 0.048    | Not assigned         | unknown                                                                             |           |
| T2-L2 | blue | Csa3G732460 | 1.343  | 0.046    | Lipid metabolism     | Sulfoquinovosyldiacylglycerol 2 (SQD2)                                              | 7.00E-209 |
| T2-L2 | blue | Csa3G733230 | -2.994 | 0.046    | Abiotic stress       | Heat shock protein 20 (HSP20)                                                       | 2.00E-13  |
| T2-L2 | blue | Csa3G776960 | 3.355  | 0.014    | Not assigned         | Thioredoxin family protein                                                          | 4.00E-81  |
| T2-L2 | blue | Csa3G820480 | 1.617  | 0.026    | Protein targeting    | Sigma factor binding protein 1 (SIB1)                                               | 1.00E-10  |
| T2-L2 | blue | Csa3G848170 | 1.744  | 0.024    | Protein degradation  | Amino peptidase M1 (APM1)                                                           | 3.00E-284 |
| T2-L2 | blue | Csa3G848300 | -2.377 | 0.021    | Miscellaneous        | nitrile lyases, berberine bridge enzymes, reticuline oxidases, troponine reductases | 9.00E-238 |
| T2-L2 | blue | Csa3G859670 | 1.268  | 0.024    | Not assigned         | unknown                                                                             | 4.00E-10  |
| T2-L2 | blue | Csa3G860260 | 4.271  | 0.028    | Abiotic stress       | Wound-responsive family protein                                                     | 1.00E-127 |
| T2-L2 | blue | Csa3G872070 | -1.57  | 0.046    | Cell wall            | Glycosyl hydrolase 9B5 (GH9B5)                                                      | 2.00E-228 |
| T2-L2 | blue | Csa3G873260 | 2.16   | 0.026    | Not assigned         | unknown                                                                             | 1.00E-06  |
| T2-L2 | blue | Csa3G878740 | 3.003  | 0.014    | Development          | DNAJ/HSP40 cystein-rich domain superfamily protein                                  | 6.00E-32  |
| T2-L2 | blue | Csa4G011770 | 3.01   | 0.015    | Transcription factor | NAC domain containing protein 83 (NAC083)                                           | 4.00E-62  |
| T2-L2 | blue | Csa4G025120 | -1.865 | 0.027    | Not assigned         | unknown                                                                             | 4.00E-44  |
| T2-L2 | blue | Csa4G052080 | 3.146  | 0.035    | Not assigned         | unknown                                                                             |           |
| T2-L2 | blue | Csa4G056640 | 1.53   | 0.011    | Hormone metabolism   | Nine-cis-epoxycarotenoid dioxygenase 4 (NCED4)                                      | 3.00E-226 |
| T2-L2 | blue | Csa4G063480 | 1.772  | 0.028    | Biotic stress        | NPR1-like protein 3                                                                 | 2.00E-37  |

Supplementary Table 1 (Continued)

|       |      |             |        |          |                                        |                                                                          |           |
|-------|------|-------------|--------|----------|----------------------------------------|--------------------------------------------------------------------------|-----------|
| T2-L2 | blue | Csa4G091870 | 3.269  | 1.43E-04 | Secondary metabolism                   | Downy mildew resistant 6 (DMR6)                                          | 5.00E-140 |
| T2-L2 | blue | Csa4G269770 | 2.17   | 0.047    | Protein posttranslational modification | Protein kinase 2B (APK2B)                                                | 2.00E-125 |
| T2-L2 | blue | Csa4G361820 | 3.071  | 0.03     | Development                            | NAC domain containing protein 32 (NAC32)                                 | 2.00E-88  |
| T2-L2 | blue | Csa4G630010 | -1.901 | 0.039    | Hormone metabolism                     | Ethylene response factor 8 (ERF8)                                        | 4.00E-32  |
| T2-L2 | blue | Csa4G646340 | 1.828  | 0.013    | Abiotic stress                         | Heat shock protein 17.6A (HSP17.6II)                                     | 1.00E-49  |
| T2-L2 | blue | Csa4G651750 | -3.219 | 0.02     | Transcription factor                   | Aspartyl protease family protein                                         | 4.00E-136 |
| T2-L2 | blue | Csa5G011650 | 1.376  | 0.021    | Miscellaneous                          | NAD(P)-binding Rossmann-fold superfamily protein                         | 3.00E-65  |
| T2-L2 | blue | Csa5G097460 | -1.366 | 1.15E-06 | Biotic stress                          | P-loop containing nucleotide triphosphate hydrolases superfamily protein | 1.00E-65  |
| T2-L2 | blue | Csa5G140450 | 7.962  | 0.02     | DNA repair                             | Heavy metal transport/detoxification superfamily protein                 | 3.00E-24  |
| T2-L2 | blue | Csa5G150420 | 2.011  | 0.048    | Transcription factor                   | Apetala2/Ethylene-responsive element binding protein family              | 1.00E-48  |
| T2-L2 | blue | Csa5G152250 | 1.603  | 2.95E-05 | DNA repair                             | Heavy metal transport/detoxification superfamily protein                 | 2.00E-27  |
| T2-L2 | blue | Csa5G152260 | -1.607 | 0.016    | DNA repair                             | Heavy metal transport/detoxification superfamily protein                 | 3.00E-27  |
| T2-L2 | blue | Csa5G153020 | 1.177  | 0.016    | Transport                              | Plasma membrane intrinsic protein 1C (PIP1C)                             | 4.00E-149 |
| T2-L2 | blue | Csa5G158570 | 1.562  | 3.77E-09 | Miscellaneous                          | Copper amine oxidase family protein                                      | 2.00E-113 |
| T2-L2 | blue | Csa5G167120 | 1.63   | 0.019    | Hormone metabolism                     | Ethylene response factor 104 (ERF104)                                    | 4.00E-45  |
| T2-L2 | blue | Csa5G168910 | -1.606 | 0.021    | Not assigned                           | unknown                                                                  |           |
| T2-L2 | blue | Csa5G168920 | 2.675  | 0.026    | Signaling                              | Leucine-rich repeat receptor -like protein kinase family protein         | 2.00E-76  |
| T2-L2 | blue | Csa5G179220 | 1.348  | 0.015    | Lipid metabolism                       | Alpha/beta-hydrolases superfamily protein                                | 1.00E-131 |
| T2-L2 | blue | Csa5G207940 | 2.293  | 3.45E-10 | Transcription factor                   | Salt-inducible zinc finger 1 (SZF1)                                      | 2.00E-44  |
| T2-L2 | blue | Csa5G547610 | -1.559 | 0.04     | Nucleotide metabolism                  | Nudix hydrolase homolog 17 (NUDT17)                                      | 2.00E-67  |
| T2-L2 | blue | Csa5G610370 | 4.368  | 0.034    | Lipid metabolism                       | PR5-like receptor kinase (PR5K)                                          | 1.00E-98  |
| T2-L2 | blue | Csa5G611750 | 1.952  | 0.016    | Metal handling                         | Heavy metal transport/detoxification superfamily protein                 | 3.00E-49  |
| T2-L2 | blue | Csa5G628650 | 7.218  | 0.02     | Hormone metabolism                     | Jasmonate-zim-domain protein 3 (JAZ3)                                    | 4.00E-18  |
| T2-L2 | blue | Csa5G630800 | -1.502 | 0.035    | Miscellaneous                          | Oxidoreductase, zinc-binding dehydrogenase family protein                | 2.00E-111 |
| T2-L2 | blue | Csa6G084580 | 3.26   | 1.04E-10 | Biotic stress                          | Disease resistance-responsive (dirigent-like protein) family protein     | 7.00E-47  |

Supplementary Table 1 (Continued)

|       |       |             |        |          |                                        |                                                                       |           |
|-------|-------|-------------|--------|----------|----------------------------------------|-----------------------------------------------------------------------|-----------|
| T2-L2 | blue  | Csa6G106800 | 2.214  | 3.81E-05 | Signaling                              | Calcium-binding EF-hand family protein                                | 3.00E-41  |
| T2-L2 | blue  | Csa6G127320 | 1.484  | 0.019    | Development                            | NAC domain containing protein 36 (NAC036)                             | 3.00E-73  |
| T2-L2 | blue  | Csa6G133770 | 2.243  | 1.52E-07 | Hormone metabolism                     | Cytokinin response factor 4 (CRF4)                                    | 2.00E-34  |
| T2-L2 | blue  | Csa6G404210 | 10.38  | 0.029    | Not assigned                           | SPFH/Band 7/ PHB domain-containing membrane-associated protein family | 5.00E-143 |
| T2-L2 | blue  | Csa6G445150 | -1.623 | 4.96E-04 | Not assigned                           | Aquaporin 2                                                           | 2.00E-118 |
| T2-L2 | blue  | Csa6G486670 | 1.638  | 0.024    | Transcription factor                   | Tonoplast intrinsic protein 2 (TIP2)                                  | 2.00E-101 |
| T2-L2 | blue  | Csa6G490900 | 3.584  | 0.021    | Transcription factor                   | Remorin family protein                                                | 8.00E-35  |
| T2-L2 | blue  | Csa6G495000 | -3.252 | 0.027    | Miscellaneous                          | Root hair specific 19 (RHS19)                                         | 5.00E-138 |
| T2-L2 | blue  | Csa6G505280 | 1.841  | 9.08E-06 | DNA synthesis                          | Histone H1-3 (HIS1-3)                                                 | 4.00E-34  |
| T2-L2 | blue  | Csa6G513580 | 1.269  | 2.01E-10 | Protein targeting                      | Peroxisomal membrane 22kDa family protein                             | 7.00E-64  |
| T2-L2 | blue  | Csa6G514860 | 1.318  | 0.033    | Transport                              | Glucose-6-phosphate/phosphate translocator 2 (GPT2)                   | 4.00E-162 |
| T2-L2 | blue  | Csa6G516580 | 1.417  | 0.044    | Signaling                              | Cysteine-rich receptor-like protein kinase 29 (CRK29)                 | 1.00E-55  |
| T2-L2 | blue  | Csa6G538630 | 1.859  | 0.015    | Co-factor and vitamin metabolism       | Molybdenum cofactor sulfurase family protein                          | 9.00E-120 |
| T2-L2 | blue  | Csa7G037660 | 1.854  | 0.036    | Protein synthesis                      | Nucleic acid-binding, OB-fold-like protein                            | 1.00E-76  |
| T2-L2 | blue  | Csa7G049260 | 2.259  | 0.022    | Protein posttranslational modification | Protein phosphatase 2C family protein                                 | 1.00E-109 |
| T2-L2 | blue  | Csa7G230940 | 1.146  | 0.023    | Redox                                  | Glutaredoxin family protein                                           | 2.00E-30  |
| T2-L2 | blue  | Csa7G253780 | 1.374  | 0.045    | Transport                              | Polyol/monosaccharide transporter 1 (PMT1)                            | 2.00E-190 |
| T2-L2 | blue  | Csa7G318990 | 1.676  | 0.023    | Biotic stress                          | Pathogenesis-related family protein                                   | 4.00E-62  |
| T2-L2 | blue  | Csa7G352410 | -1.471 | 0.026    | Not assigned                           | unknown                                                               | 6.00E-71  |
| T2-L2 | blue  | Csa7G372360 | -4.168 | 2.77E-06 | Miscellaneous                          | Defective in induced resistance 1 (DIR1)                              | 6.00E-21  |
| T2-L2 | blue  | Csa7G429630 | 1.754  | 0.017    | Not assigned                           | unknown                                                               | 5.00E-35  |
| T2-L2 | blue  | Csa7G432550 | 1.637  | 0.013    | Not assigned                           | Tetratricopeptide repeat (TPR)-like superfamily protein               | 3.00E-50  |
| T2-L2 | brown | Csa4G297410 | -4.596 | 1.61E-05 | Abiotic stress                         | Pollen Ole e 1 allergen and extensin family protein                   | 4.00E-62  |
| T2-L2 | brown | Csa3G179180 | -4.461 | 1.86E-10 | Not assigned                           | unknown                                                               |           |
| T2-L2 | brown | Csa7G390010 | -3.971 | 1.12E-05 | Not assigned                           | unknown                                                               |           |
| T2-L2 | brown | Csa1G062340 | -2.872 | 2.35E-04 | Miscellaneous                          | GDSL-like Lipase/Acylhydrolase superfamily protein                    | 3.00E-171 |
| T2-L2 | brown | Csa6G139210 | -2.397 | 2.49E-03 | Miscellaneous                          | Indole-3-acetate beta-D-glucosyltransferase (IAGLU)                   | 1.00E-27  |

Supplementary Table 1 (Continued)

|       |       |             |        |             |                                        |                                                                                                |          |
|-------|-------|-------------|--------|-------------|----------------------------------------|------------------------------------------------------------------------------------------------|----------|
| T2-L2 | brown | Csa5G642130 | -1.918 | 1.35E-03    | Miscellaneous                          | Peroxidase superfamily protein                                                                 | 1.00E-98 |
| T2-L2 | brown | Csa3G035890 | -1.737 | 1.64E-04    | Transcription factor                   | WRKY DNA-binding protein 40 (WRKY40)                                                           | 2.00E-32 |
| T2-L2 | brown | Csa6G148170 | -1.707 | 9.44E-13    | Photosynthesis                         | Chlorophyll A/B binding protein 1 (CAB1)                                                       | 6.00E-11 |
| T2-L2 | brown | Csa3G239280 | -1.465 | 7.68E-03    | Miscellaneous                          | Peroxidase superfamily protein                                                                 | 8.00E-14 |
| T2-L2 | brown | Csa4G126430 | -1.413 | 1.80E-03    | development                            | flowering-time gene CONSTANS (CO) encoding zinc-finger proteins                                | 3.00E-86 |
| T2-L2 | brown | Csa1G066480 | -1.393 | 7.30E-03    | Not assigned                           | unknown                                                                                        |          |
| T2-L2 | brown | Csa2G369210 | -1.274 | 3.12E-03    | Not assigned                           | unknown                                                                                        |          |
| T2-L2 | brown | Csa7G451340 | 1      | 0           | Miscellaneous                          | Nitrile lyases, berberine bridge enzymes, reticuline oxidases, troponine reductases            | 8.00E-21 |
| T2-L2 | brown | Csa6G109750 | 1.185  | 0.046       | Miscellaneous                          | Bif-unctional inhibitor/lipid-transfer protein/seed storage 2S albumin superfamily protein     | 6.00E-41 |
| T2-L2 | brown | Csa6G318680 | 1.312  | 0.0007313   | Protein degradation                    | Small ubiquitin-like modifier 1 (SUMO1)                                                        | 1.00E-42 |
| T2-L2 | brown | Csa6G446450 | 1.369  | 4.52E-03    | biotic stress                          | Late embryogenesis abundant (LEA) hydroxyproline-rich glycoprotein family                      | 2.00E-62 |
| T2-L2 | brown | Csa3G150800 | 1.389  | 1.57E-03    | not assigned                           | unknown                                                                                        |          |
| T2-L2 | brown | Csa6G150550 | 1.445  | 0.000008129 | Redox                                  | Copper/zinc superoxide dismutase 2 (CSD2)                                                      | 1.00E-89 |
| T2-L2 | brown | Csa7G024130 | 1.47   | 2.38E-03    | Not assigned                           | unknown                                                                                        |          |
| T2-L2 | brown | Csa2G336130 | 1.485  | 0.011       | RNA binding                            | glycine-rich RNA binding protein (GLYCINE RICH PROTEIN 7)                                      | 1.00E-58 |
| T2-L2 | brown | Csa5G171740 | 1.562  | 3.769E-09   | Miscellaneous                          | Copper amine oxidase family protein                                                            | 4.00E-11 |
| T2-L2 | brown | Csa1G212840 | 1.58   | 0           | Protein degradation                    | Cystatin/monellin superfamily protein                                                          | 5.00E-07 |
| T2-L2 | brown | Csa7G452200 | 1.581  | 0.024       | transport                              | Delta tonoplast intrinsic protein, functions as a water channel and ammonium (NH3) transporter | 4.00E-11 |
| T2-L2 | brown | Csa6G521090 | 1.68   | 0.000001159 | Miscellaneous                          | alpha/beta-hydrolases superfamily protein                                                      | 1.00E-12 |
| T2-L2 | brown | Csa3G710200 | 1.705  | 3.66E-03    | Not assigned                           | unknown                                                                                        |          |
| T2-L2 | brown | Csa7G025720 | 1.772  | 0.0001424   | Protein posttranslational modification | Protein kinase superfamily protein                                                             | 4.00E-16 |
| T2-L2 | brown | Csa5G631510 | 1.776  | 2.25E-03    | Not assigned                           | unknown                                                                                        |          |
| T2-L2 | brown | Csa2G009470 | 1.841  | 0.0003098   | Lipid metabolism                       | Abnormal inflorescence meristem (AIM1)                                                         | 3.00E-29 |
| T2-L2 | brown | Csa2G351840 | 2.309  | 0.00001605  | Miscellaneous                          | Glutathione S-transferase zeta 1 (GSTZ1)                                                       | 9.00E-78 |
| T2-L2 | brown | Csa4G001980 | 2.335  | 7.43E-04    | not assigned                           | unknown                                                                                        |          |
| T2-L2 | brown | Csa3G736660 | 2.599  | 2.35E-04    | Not assigned                           | unknown                                                                                        |          |
| T2-L2 | brown | Csa3G778440 | 2.637  | 0.001429    | Miscellaneous                          | Glutathione S-transferase L3 (GSTL3)                                                           | 1.00E-95 |

Supplementary Table 1 (Continued)

|       |       |             |        |            |                      |                                                          |           |
|-------|-------|-------------|--------|------------|----------------------|----------------------------------------------------------|-----------|
| T2-L2 | brown | Csa1G228960 | 3.136  | 0.00003412 | Transport            | Pyrophosphate-energized vacuolar membrane proton pump    | 0.00E+00  |
| T2-L2 | brown | Csa5G319910 | 3.216  | 0.003151   | Transcription factor | WRKY DNA-binding protein 54 (WRKY54)                     | 3.00E-96  |
| T2-L2 | brown | Csa6G148290 | 3.755  | 1.73E-05   | Not assigned         | unknown                                                  |           |
| T2-L2 | brown | Csa2G361590 | 5.96   | 1.72E-06   | Not assigned         | unknown                                                  |           |
| T2-L2 | brown | Csa7G447100 | 8      |            | Transport            | Tonoplast intrinsic protein 2;3 (TIP 2;3)                | 5.00E-107 |
| T2-L2 | brown | Csa6G356490 | 9.406  | 7.34E-04   | Not assigned         | unknown                                                  |           |
| T2-L2 | brown | Csa5G547610 | 9.656  | 0.0000344  | Lipid metabolism     | AMP-dependent synthetase and ligase family protein       | 6.00E-236 |
| T2-L2 | brown | Csa7G037660 | 14.168 | 7.21E-03   | Not assigned         | unknown                                                  |           |
| T2-L2 | brown | Csa1G109330 | -3.47  | 0.013      | Protein degradation  | Serine carboxypeptidase-like 48 (SCPL48)                 | 3.00E-109 |
| T2-L2 | brown | Csa1G123470 | 1.58   | 0          | Protein degradation  | Cystatin/monellin superfamily protein                    |           |
| T2-L2 | brown | Csa2G003610 | 1.841  | 3.10E-04   | Lipid metabolism     | Abnormal inflorescence meristem (AIM1)                   | 3.00E-294 |
| T2-L2 | brown | Csa2G120410 | 1.347  | 3.65E-09   | Protein synthesis    | Zinc-binding ribosomal protein family protein            | 7.00E-47  |
| T2-L2 | brown | Csa2G382650 | -1.737 | 1.64E-04   | Transcription factor | WRKY DNA-binding protein 40 (WRKY40)                     | 8.00E-147 |
| T2-L2 | brown | Csa3G119700 | 3.575  | 5.38E-05   | Transcription factor | WRKY DNA-binding protein 53 (WRKY53)                     | 1.00E-102 |
| T2-L2 | brown | Csa3G600020 | -2.306 | 4.96E-04   | Secondary metabolism | Chalcone synthase 2 (CHS2)                               | 5.00E-212 |
| T2-L2 | brown | Csa3G734160 | 2.599  | 2.35E-04   | Not assigned         | Unknown                                                  | 2.00E-17  |
| T2-L2 | brown | Csa3G814360 | 2.296  | 0.013      | Not assigned         | Unknown                                                  | 8.00E-26  |
| T2-L2 | brown | Csa3G903520 | -1.154 | 0.029      | Photosynthesis       | Glycine decarboxylase complex H (GDCH)                   | 2.00E-78  |
| T2-L2 | brown | Csa3G911280 | 1.219  | 3.02E-03   | Development          | DUF581                                                   | 2.00E-44  |
| T2-L2 | brown | Csa4G011770 | 3.01   | 0.015      | Transcription factor | NAC domain containing protein 83 (NAC083)                | 3.00E-81  |
| T2-L2 | brown | Csa4G062920 | 1.404  | 6.20E-06   | Miscellaneous        | Polyamine oxidase 2 (PAO2)                               | 3.00E-228 |
| T2-L2 | brown | Csa4G361820 | 3.071  | 0.03       | Development          | NAC domain containing protein 32 (NAC32)                 | 5.00E-120 |
| T2-L2 | brown | Csa4G630010 | -1.901 | 0.039      | Hormone metabolism   | Ethylene response factor 8 (ERF8)                        | 2.00E-34  |
| T2-L2 | brown | Csa4G651750 | -3.219 | 0.02       | Transcription factor | Aspartyl protease family protein                         | 2.00E-142 |
| T2-L2 | brown | Csa5G140450 | 7.962  | 0.02       | DNA repair           | Heavy metal transport/detoxification superfamily protein | 1.00E-61  |
| T2-L2 | brown | Csa5G158570 | 1.562  | 3.77E-09   | Miscellaneous        | Copper amine oxidase family protein                      | 4.00E-114 |
| T2-L2 | brown | Csa5G223070 | 3.216  | 3.15E-03   | Transcription factor | WRKY DNA-binding protein 54 (WRKY54)                     | 3.00E-96  |
| T2-L2 | brown | Csa5G605150 | 1.346  | 0.021      | RNA processing       | Ribonuclease T2                                          | 6.00E-105 |
| T2-L2 | brown | Csa5G608610 | 1.776  | 2.25E-03   | Not assigned         | Unknown                                                  | 4.00E-31  |
| T2-L2 | brown | Csa5G650560 | 6.11   | 0.037      | Miscellaneous        | GDSL-like Lipase/Acylhydrolase superfamily protein       | 2.00E-153 |

Supplementary Table 1 (Continued)

|       |           |             |        |           |                              |                                                                                            |           |
|-------|-----------|-------------|--------|-----------|------------------------------|--------------------------------------------------------------------------------------------|-----------|
| T2-L2 | brown     | Csa6G014540 | 1.836  | 0.019     | Cell wall                    | Expansin A8 (EXPA8)                                                                        | 6.00E-125 |
| T2-L2 | brown     | Csa6G057170 | -1.227 | 0.027     | Photosynthesis               | Light harvesting complex photosystem II subunit 6 (LHCB6)                                  | 3.00E-139 |
| T2-L2 | brown     | Csa6G139750 | -1.707 | 9.44E-13  | Photosynthesis               | Chlorophyll A/B binding protein 1 (CAB1)                                                   | 1.00E-149 |
| T2-L2 | brown     | Csa6G152330 | 1.508  | 2.61E-03  | Protein synthesis            | Ribosomal protein L1p/L10e family                                                          | 1.00E-111 |
| T2-L2 | brown     | Csa6G157680 | 1.312  | 7.31E-04  | Protein degradation          | Small ubiquitin-like modifier 2 (SUMO2)                                                    | 1.00E-45  |
| T2-L2 | brown     | Csa6G404210 | 10.38  | 0.029     | Not assigned                 | SPFH/Band 7/ PHB domain-containing membrane-associated protein family                      | 2.00E-155 |
| T2-L2 | brown     | Csa6G404270 | 1.408  | 0.049     | Abiotic stress               | Germin-like protein 7 (GLP7)                                                               | 7.00E-71  |
| T2-L2 | brown     | Csa6G405340 | -3.365 | 0.028     | Cell wall                    | Glycosyl hydrolase superfamily protein                                                     | 1.00E-205 |
| T2-L2 | brown     | Csa6G517180 | 1.68   | 1.16E-06  | Miscellaneous                | Alpha/beta-hydrolases superfamily protein                                                  | 1.00E-128 |
| T2-L2 | brown     | Csa6G538750 | 1.47   | 2.38E-03  | Not assigned                 | DUF23                                                                                      | 2.00E-200 |
| T2-L2 | brown     | Csa7G037610 | 14.168 | 7.21E-03  | Not assigned                 | Unknown                                                                                    | 2.00E-45  |
| T2-L2 | brown     | Csa7G066240 | 3.449  | 0.036     | Not assigned                 | Unknown                                                                                    |           |
| T2-L2 | brown     | Csa7G071460 | 1.556  | 1.42E-04  | Protein synthesis            | Ribosomal protein S14p/S29e family protein                                                 | 1.00E-28  |
| T2-L2 | brown     | Csa7G073430 | -3.971 | 1.12E-05  | Not assigned                 | DUF579                                                                                     | 3.00E-78  |
| T2-L2 | brown     | Csa7G428940 | 1.343  | 0.033     | Protein synthesis            | Ribosomal protein L6 family protein                                                        | 2.00E-115 |
| T2-L2 | brown     | Csa7G430130 | -1.498 | 0.047     | Lipid metabolism             | Bi-functional inhibitor/lipid-transfer protein/seed storage 2S albumin superfamily protein | 8.00E-48  |
| T2-L2 | grey      | Csa6G407650 | 1.837  | 0.0001765 | Biodegradation of xenobiotic | UDP glycosyltransferase (UGT)                                                              | 1.00E-132 |
| T2-L2 | grey      | Csa1G050250 | 1.106  | 6.41E-03  | Glycolysis                   | Glyceraldehyde-3-phosphate dehydrogenase                                                   | 2.00E-188 |
| T2-L2 | grey      | Csa3G680120 | 1.221  | 0.031     | Minor CHO metabolism         | Galactinol synthase 1 (GolS1)                                                              | 1.00E-156 |
| T2-L2 | grey      | Csa4G618520 | 1.837  | 1.77E-04  | Hormone metabolism           | UDP-Glycosyltransferase superfamily protein                                                | 1.00E-132 |
| T2-L2 | turquoise | Csa3G122470 | -6.667 | 5.69E-04  | Not assigned                 | unknown                                                                                    |           |
| T2-L2 | turquoise | Csa4G167980 | -4.114 | 1.13E-06  | Not assigned                 | unknown                                                                                    |           |
| T2-L2 | turquoise | Csa5G152260 | -4.109 | 7.06E-04  | Cell wall                    | Pectin lyase-like superfamily protein                                                      | 1.00E-79  |
| T2-L2 | turquoise | Csa5G139600 | -3.252 | 4.53E-05  | Protein degradation          | Prolyl oligopeptidase family protein                                                       | 3.00E-69  |
| T2-L2 | turquoise | Csa4G000930 | -3.167 | 4.50E-04  | Not assigned                 | unknown                                                                                    |           |
| T2-L2 | turquoise | Csa7G387690 | -3.105 | 5.63E-05  | Not assigned                 | unknown                                                                                    |           |
| T2-L2 | turquoise | Csa3G849920 | -2.921 | 6.11E-16  | Transcription factor         | MYB domain protein 30 (MYB30)                                                              | 7.00E-209 |
| T2-L2 | turquoise | Csa6G190340 | -2.765 | 8.71E-05  | Miscellaneous                | UDP-Glycosyltransferase superfamily protein                                                | 3.00E-84  |
| T2-L2 | turquoise | Csa6G518250 | -2.436 | 7.19E-06  | Development                  | Squamosa promoter binding protein-like 8 (SPL8)                                            | 4.00E-162 |
| T2-L2 | turquoise | Csa7G450510 | -2.276 | 9.15E-03  | Secondary metabolism         | Cinnamoyl Coenzyme A reductase 1 (CCR1)                                                    | 5.00E-152 |

Supplementary Table 1 (Continued)

|       |           |             |        |          |                      |                                                                                                                   |           |
|-------|-----------|-------------|--------|----------|----------------------|-------------------------------------------------------------------------------------------------------------------|-----------|
| T2-L2 | turquoise | Csa5G505200 | -2.248 | 1.07E-03 | Protein degradation  | Anaphase-promoting complex/cyclosome 2 (APC2)                                                                     | 8.00E-148 |
| T2-L2 | turquoise | Csa4G416430 | -2.238 | 1.75E-03 | Lipid metabolism     | Nonspecific lipid-transfer protein precursor (LTP)                                                                | 1.00E-109 |
| T2-L2 | turquoise | Csa7G049260 | -1.969 | 6.68E-05 | Hormone metabolism   | Ethylene responsive element binding factor 4 (ERF4)                                                               | 7.00E-113 |
| T2-L2 | turquoise | Csa3G202730 | -1.907 | 1.38E-12 | Secondary metabolism | Beta-hydroxylase 1 (BETA_OHASE1)                                                                                  | 3.00E-89  |
| T2-L2 | turquoise | Csa1G420360 | -1.884 | 5.86E-03 | Not assigned         | unknown                                                                                                           |           |
| T2-L2 | turquoise | Csa7G043640 | -1.87  | 9.28E-04 | Protein degradation  | Xylem cysteine peptidase 1 (XCP1)                                                                                 | 7.00E-150 |
| T2-L2 | turquoise | Csa4G639870 | -1.85  | 6.66E-03 | Not assigned         | unknown                                                                                                           |           |
| T2-L2 | turquoise | Csa6G309950 | -1.797 | 8.01E-05 | Light signaling      | Phototropin 1 (PHO1)                                                                                              | 3.00E-45  |
| T2-L2 | turquoise | Csa1G050420 | -1.733 | 4.47E-06 | Not assigned         | unknown                                                                                                           |           |
| T2-L2 | turquoise | Csa3G252490 | -1.725 | 6.57E-03 | Not assigned         | unknown                                                                                                           |           |
| T2-L2 | turquoise | Csa6G109650 | -1.652 | 7.76E-03 | Secondary metabolism | Flavanone 3-hydroxylase (F3H)                                                                                     | 7.00E-156 |
| T2-L2 | turquoise | Csa7G230940 | -1.647 | 9.38E-06 | Cell wall            | Fasciclin-like arabinogalactan protein 1 (FLA1)                                                                   | 9.00E-70  |
| T2-L2 | turquoise | Csa2G000230 | -1.618 | 1.21E-03 | Cell wall            | Fasciclin-like arabinogalactan protein 17 precursor (FLA17)                                                       | 2.00E-119 |
| T2-L2 | turquoise | Csa1G462020 | -1.607 | 6.30E-03 | Biotic stress        | Cystein-rich secretory proteins, Antigen 5, and Pathogenesis-related 1 protein                                    |           |
| T2-L2 | turquoise | Csa6G517960 | -1.596 | 8.96E-03 | Development          | Senescence 1 (SEN1)                                                                                               | 5.00E-138 |
| T2-L2 | turquoise | Csa2G173070 | -1.522 | 4.76E-03 | Photosynthesis       | Serine hydroxymethyltransferase 4 (SHM4)                                                                          | 3.00E-137 |
| T2-L2 | turquoise | Csa5G207940 | -1.5   | 5.58E-08 | Photosynthesis       | RuBisCO activase (RA)                                                                                             |           |
| T2-L2 | turquoise | Csa3G182240 | -1.494 | 5.11E-03 | Secondary metabolism | 2-oxoglutarate (2OG) and Fe(II)-dependent oxygenase superfamily protein                                           | 7.00E-93  |
| T2-L2 | turquoise | Csa5G162630 | -1.494 | 0.021    | miscellaneous        | extensin-like protein (ELP) (Arabidopsis thaliana)                                                                | 3.00E-52  |
| T2-L2 | turquoise | Csa3G563300 | -1.485 | 7.90E-03 | Lipid metabolism     | Lysophospholipase 2 (LysoPL2)                                                                                     | 1.00E-126 |
| T2-L2 | turquoise | Csa3G035840 | -1.464 | 0.021    | miscellaneous        | Bi-functional inhibitor/lipid-transfer protein/seed storage 2S albumin superfamily protein (Arabidopsis thaliana) | 5.00E-10  |
| T2-L2 | turquoise | Csa5G174640 | -1.419 | 9.38E-06 | Abiotic stress       | Bcl2-associated anthanogene (ABG) protein                                                                         | 3.00E-77  |
| T2-L2 | turquoise | Csa7G336450 | -1.375 | 6.08E-03 | Photosynthesis       | Non-photochemical quenching 4 (NPQ4)                                                                              | 4.00E-107 |
| T2-L2 | turquoise | Csa6G013960 | -1.334 | 5.05E-03 | Photosynthesis       | RuBisCO activase (RA)                                                                                             | 1.00E-69  |
| T2-L2 | turquoise | Csa3G539670 | -1.282 | 7.34E-04 | Photosynthesis       | Photosystem I subunit H2 (PSAH2)                                                                                  | 0         |
| T2-L2 | turquoise | Csa7G398090 | -1.261 | 7.43E-04 | development          | Late embryogenesis abundant 3 (LEA3) family protein                                                               | 2.00E-20  |
| T2-L2 | turquoise | Csa5G171730 | -1.229 | 1.50E-04 | not assigned         | unknown                                                                                                           |           |
| T2-L2 | turquoise | Csa3G826640 | -1.228 | 1.14E-04 | Lipid metabolism     | Fatty acid desaturase 3                                                                                           | 2.00E-108 |
| T2-L2 | turquoise | Csa3G874340 | -1.221 | 3.64E-04 | protein folding      | DnaJ/Hsp40 cysteine-rich domain superfamily protein                                                               | 6.00E-73  |

Supplementary Table 1 (Continued)

|       |           |             |        |            |                      |                                                                              |           |
|-------|-----------|-------------|--------|------------|----------------------|------------------------------------------------------------------------------|-----------|
| T2-L2 | turquoise | Csa5G212590 | -1.194 | 0.012      | lipid metabolism     | Omega-3 fatty acid desaturase, chloroplast precursor                         | 1.00E-274 |
| T2-L2 | turquoise | Csa3G134920 | 1.136  | 6.18E-03   | Not assigned         | unknown                                                                      |           |
| T2-L2 | turquoise | Csa6G381850 | 1.251  | 1.62E-03   | Not assigned         | unknown                                                                      |           |
| T2-L2 | turquoise | Csa1G569380 | 1.278  | 2.06E-04   | Abiotic stress       | A member of heat shock protein 90 (HSP90) gene family (Arabidopsis thaliana) | 3.00E-270 |
| T2-L2 | turquoise | Csa1G043180 | 1.285  | 0.00657    | Hormone metabolism   | Jasmonate-zim-domain protein 3 (JAZ3)                                        | 0.00E+00  |
| T2-L2 | turquoise | Csa6G289760 | 1.294  | 0.000364   | Photosynthesis       | ATP synthase protein 1-related                                               | 6.00E-131 |
| T2-L2 | turquoise | Csa5G179220 | 1.295  | 0.009199   | RNA Processing       | Fibrillarin 2 (FIB2)                                                         | 1.00E-151 |
| T2-L2 | turquoise | Csa1G046840 | 1.3    | 6.55E-05   | Not assigned         | unknown                                                                      |           |
| T2-L2 | turquoise | Csa6G151730 | 1.311  | 4.19E-04   | Hormone metabolism   | Multiprotein bridging factor 1B (MBF1B)                                      | 2.00E-42  |
| T2-L2 | turquoise | Csa3G483790 | 1.33   | 0.006473   | RNA binding          | RNA-binding (RRM/RBD/RNP motifs) family protein                              | 7.00E-46  |
| T2-L2 | turquoise | Csa2G247040 | 1.332  | 1.62E-03   | Not assigned         | unknown                                                                      |           |
| T2-L2 | turquoise | Csa1G039240 | 1.338  | 0.004886   | RNA binding          | Glycine-rich RNA-binding protein 3 (GR-RBP3)                                 | 3.00E-62  |
| T2-L2 | turquoise | Csa3G826690 | 1.409  | 6.998E-11  | Transport            | Silicon transpoter LSI1                                                      | 3.00E-145 |
| T2-L2 | turquoise | Csa3G101810 | 1.426  | 0.003945   | Protein synthesis    | Translation initiation factor SUI family protein                             | 9.00E-54  |
| T2-L2 | turquoise | Csa3G110620 | 1.426  | 0.002703   | Transcription factor | NAC domain containing protein 3 (NAC3)                                       | 7.00E-102 |
| T2-L2 | turquoise | Csa4G000800 | 1.451  | 0.001625   | RNA binding          | Hyaluronan/mRNA binding family                                               | 2.00E-128 |
| T2-L2 | turquoise | Csa2G258680 | 1.466  | 0.01       | Hormone metabolism   | SAUR-like auxin-responsive protein family                                    | 0.00E+00  |
| T2-L2 | turquoise | Csa6G151110 | 1.503  | 9.23E-03   | cell wall            | cellulose synthase-like A02 (CSLA02) (Arabidopsis thaliana)                  | 5.00E-251 |
| T2-L2 | turquoise | Csa3G153170 | 1.515  | 0.00005673 | Redox                | Thioredoxin superfamily protein                                              | 2.00E-39  |
| T2-L2 | turquoise | Csa6G421800 | 1.523  | 0.0007678  | Protein degradation  | Ubiquitin-like protein 5 (UBL5)                                              | 2.00E-35  |
| T2-L2 | turquoise | Csa4G651760 | 1.53   | 0.01       | Transcription factor | MYB domain protein R1 (MYBR1)                                                |           |
| T2-L2 | turquoise | Csa3G118080 | 1.532  | 9.679E-12  | Development          | Squamosa promoter binding protein-like 10 (SPL10)                            | 1.00E-95  |
| T2-L2 | turquoise | Csa6G046270 | 1.562  | 0.0006147  | Transcription factor | Constants-like zinc finger family                                            | 2.00E-186 |
| T2-L2 | turquoise | Csa1G041530 | 1.567  | 2.71E-03   | Not assigned         | unknown                                                                      |           |
| T2-L2 | turquoise | Csa6G088070 | 1.582  | 1.49E-06   | Not assigned         | unknown                                                                      |           |
| T2-L2 | turquoise | Csa3G808360 | 1.638  | 0.0002177  | TCA                  | Putative alpha-carbonic anhydrase (CAH1)                                     | 4.00E-81  |
| T2-L2 | turquoise | Csa5G140480 | 1.639  | 0.00005501 | Development          | Nodulin MtN3 family                                                          | 5.00E-85  |
| T2-L2 | turquoise | Csa3G127210 | 1.687  | 1.29E-03   | Not assigned         | unknown                                                                      |           |
| T2-L2 | turquoise | Csa7G049230 | 1.702  | 0.036      | not assigned         | unknown                                                                      |           |
| T2-L2 | turquoise | Csa2G368880 | 1.706  | 0.003583   | Redox                | Thioredoxin H-type 1 (TRX1)                                                  | 1.00E-32  |
| T2-L2 | turquoise | Csa4G017110 | 1.754  | 4.35E-04   | Not assigned         | unknown                                                                      |           |
| T2-L2 | turquoise | Csa1G569250 | 1.778  | 9.18E-03   | Not assigned         | unknown                                                                      |           |



Supplementary Table 1 (Continued)

|       |           |             |       |             |                                        |                                                                                 |           |
|-------|-----------|-------------|-------|-------------|----------------------------------------|---------------------------------------------------------------------------------|-----------|
| T2-L2 | turquoise | Csa2G362490 | 1.788 | 0           | Not assigned                           | unknown                                                                         |           |
| T2-L2 | turquoise | Csa1G021950 | 1.803 | 0           | RNA binding                            | Glycine-rich RNA-binding protein 3 (GR-RBP3)                                    | 6.00E-74  |
| T2-L2 | turquoise | Csa2G006870 | 1.822 | 0.000168    | Cell organization                      | Profillin 3                                                                     | 3.00E-68  |
| T2-L2 | turquoise | Csa2G359940 | 1.869 | 0.027       | RNA regulation of transcription        | Member of the R2R3 factor MYB gene family; myb domain protein r1 (MYBR1)        | 4.00E-115 |
| T2-L2 | turquoise | Csa2G012120 | 1.884 | 0           | Miscellaneous                          | Uclacyanin 1 (UCC1)                                                             | 3.00E-38  |
| T2-L2 | turquoise | Csa2G028480 | 1.908 | 9.15E-03    | hormone metabolism                     | Lipoxygenase 1 (EC 1.13.11.12) - (Solanum tuberosum)                            | 2.00E-25  |
| T2-L2 | turquoise | Csa6G242200 | 1.979 | 2.91E-03    | signaling                              | Rapid Alkalinization Factor (RALF) 23                                           | 4.00E-32  |
| T2-L2 | turquoise | Csa2G258610 | 1.987 | 0.0009968   | RNA binding                            | Glycine rich protein 7 (GRP7)                                                   | 1.00E-58  |
| T2-L2 | turquoise | Csa3G739040 | 2.068 | 0.00483     | Biodegradation of xenobiotic           | Gloxxal oxidase-related protein                                                 | 1.00E-258 |
| T2-L2 | turquoise | Csa2G431070 | 2.23  | 0.000006487 | Abiotic stress                         | SHEPHERD (SHD)                                                                  | 0.00E+00  |
| T2-L2 | turquoise | Csa3G129540 | 2.231 | 0.021       | protein synthesis                      | chloroplast ribosomal protein S7 (Arabidopsis thaliana)                         | 3.00E-81  |
| T2-L2 | turquoise | Csa5G604980 | 2.243 | 0           | Amino acid metabolism                  | O-acetylserine(thiol) lyase (OAS-TL)                                            | 4.00E-162 |
| T2-L2 | turquoise | Csa1G024920 | 2.253 | 0.007294    | Protein posttranslational modification | RACK1B                                                                          | 7.00E-174 |
| T2-L2 | turquoise | Csa1G386590 | 2.258 | 3.86E-04    | not assigned                           | unknown                                                                         |           |
| T2-L2 | turquoise | Csa1G587400 | 2.496 | 0.00002831  | Protein degradation                    | Metallopeptidase M24 family protein                                             | 3.00E-172 |
| T2-L2 | turquoise | Csa7G395800 | 2.631 | 0.000001654 | Transport                              | Sulfate transporter 3;1 (SULTR 3;1)                                             | 3.00E-307 |
| T2-L2 | turquoise | Csa1G600980 | 2.792 | 0.00737     | Protein posttranslational modification | AGC (cAMP-dependent, cGMP-dependent and protein kinase C) kinase family protein | 2.00E-235 |
| T2-L2 | turquoise | Csa5G589260 | 2.953 | 0.000001814 | Miscellaneous                          | Plant invertase/pectin methylesterase inhibitor superfamily protein             | 5.00E-62  |
| T2-L2 | turquoise | Csa5G139420 | 3.156 | 6.39E-05    | Not assigned                           | unknown                                                                         |           |
| T2-L2 | turquoise | Csa5G615230 | 3.177 | 2.18E-03    | Not assigned                           | unknown                                                                         |           |
| T2-L2 | turquoise | Csa4G620640 | 3.195 | 0           | Protein targeting                      | Sigma factor binding protein 1 (SIB1)                                           | 2.00E-14  |
| T2-L2 | turquoise | Csa4G420110 | 3.334 | 0           | Protein degradation                    | Metacaspase 9 (MC9)                                                             | 1.00E-120 |
| T2-L2 | turquoise | Csa7G397040 | 3.415 | 0.001823    | Miscellaneous                          | Glutathione S-transferase phi 8 (GSTF8)                                         | 3.00E-82  |
| T2-L2 | turquoise | Csa6G445040 | 3.81  | 6.53E-03    | Not assigned                           | unknown                                                                         |           |
| T2-L2 | turquoise | Csa6G382970 | 3.831 | 0.001156    | Transport                              | Amino acid permease 3 (AAP3)                                                    | 2.00E-234 |
| T2-L2 | turquoise | Csa1G039120 | 4.104 | 0.00004243  | Development                            | Nascent polypeptide-associated complex NAC                                      | 4.00E-68  |
| T2-L2 | turquoise | Csa2G072490 | 4.767 | 5.874E-08   | Protein amino acid activation          | Glycyl-tRNA synthetase                                                          | 0.00E+00  |

Supplementary Table 1 (Continued)

|       |           |             |         |            |                               |                                                          |           |
|-------|-----------|-------------|---------|------------|-------------------------------|----------------------------------------------------------|-----------|
| T2-L2 | turquoise | Csa3G026690 | 4.954   | 0.006704   | Lipid metabolism              | Palmitoy (protein) hydrolase                             | 5.00E-77  |
| T2-L2 | turquoise | Csa5G567800 | 5.13    | 0.00002257 | Redox                         | Glutaredoxin                                             | 9.00E-41  |
| T2-L2 | turquoise | Csa2G070890 | 5.345   | 0.003945   | Abiotic stress                | DNAJ heat shock N-terminal domain-containing protein     | 2.00E-137 |
| T2-L2 | turquoise | Csa3G002850 | 5.719   | 0.00004243 | Biotic stress                 | Thaumatococcus-like protein 1                            | 2.00E-166 |
| T2-L2 | turquoise | Csa7G429630 | 9.428   | 8.95E-05   | Not assigned                  | unknown                                                  |           |
|       |           |             |         |            | Protein                       |                                                          |           |
| T2-L2 | turquoise | Csa6G008680 | 9.581   | 0.004781   | postranslational modification | CBL-interacting protein kinase 1 (CIPK1)                 | 3.00E-169 |
|       |           |             |         |            |                               |                                                          |           |
| T2-L2 | turquoise | Csa5G470570 | 14.58   | 0.00536    | Transcription factor          | Response regulator 9 (ARR9)                              | 7.00E-57  |
| T2-L2 | turquoise | Csa4G639890 | 15.851  | 0.00001712 | Lipid metabolism              | Triacylglycerol lipase like 1 (TLL1)                     | 2.00E-131 |
| T2-L2 | turquoise | Csa7G009740 | 125.334 | 0.009597   | Transcription factor          | Cryptochrome-interacting basic-helix-loop-helix (CIB1)   | 1.00E-115 |
| T2-L2 | turquoise | Csa1G000010 | 1.357   | 0.029      | Protein synthesis             | 60S acidic ribosomal protein family                      | 5.00E-36  |
| T2-L2 | turquoise | Csa1G009690 | 1.458   | 3.16E-08   | Protein synthesis             | Ribosomal protein L34                                    | 1.00E-59  |
| T2-L2 | turquoise | Csa1G013160 | 1.322   | 0.01       | Not assigned                  | Unknown                                                  | 3.00E-42  |
| T2-L2 | turquoise | Csa1G013770 | 1.803   | 0          | RNA binding                   | Glycine rich RNA-binding protein 5 (GR-RBP5)             | 6.00E-74  |
| T2-L2 | turquoise | Csa1G024170 | 1.522   | 3.55E-06   | Protein synthesis             | Ribosomal protein S7e family protein                     | 2.00E-92  |
|       |           |             |         |            | Protein                       |                                                          |           |
| T2-L2 | turquoise | Csa1G024830 | 2.253   | 7.29E-03   | postranslational modification | Receptor for activated C kinase 1B (RACK1B)              | 7.00E-174 |
|       |           |             |         |            |                               |                                                          |           |
| T2-L2 | turquoise | Csa1G031860 | 4.104   | 4.24E-05   | Transcription factor          | Basic transcription factor 3                             | 4.00E-68  |
| T2-L2 | turquoise | Csa1G039190 | 1.338   | 4.89E-03   | RNA binding                   | Glycine rich RNA-binding protein 5 (GR-RBP5)             | 3.00E-62  |
| T2-L2 | turquoise | Csa1G039250 | 1.567   | 2.71E-03   | Not assigned                  | DUF1118                                                  | 7.00E-70  |
| T2-L2 | turquoise | Csa1G042360 | 1.281   | 2.35E-03   | Protein synthesis             | Ribosomal protein S7e family protein                     | 2.00E-91  |
|       |           |             |         |            | Hormone metabolism            |                                                          |           |
| T2-L2 | turquoise | Csa1G042920 | 1.285   | 6.57E-03   |                               | Jasmonate-zim-domain protein 3 (JAZ3)                    | 2.00E-37  |
|       |           |             |         |            | Not assigned                  | DUF1118                                                  | 5.00E-67  |
| T2-L2 | turquoise | Csa1G050240 | -1.256  | 0.029      | Glycolysis                    | Glyceraldehyde-3-phosphate dehydrogenase (GAP-DH)        | 4.00E-189 |
| T2-L2 | turquoise | Csa1G050270 | -1.733  | 4.47E-06   | Not assigned                  | Unknown                                                  | 1.00E-149 |
| T2-L2 | turquoise | Csa1G051810 | 1.38    | 0.012      | Signaling                     | Calnexin 1 (CNX1)                                        | 4.00E-256 |
| T2-L2 | turquoise | Csa1G059750 | 2.634   | 0.024      | Not assigned                  | Unknown                                                  |           |
| T2-L2 | turquoise | Csa1G063560 | 1.22    | 0.043      | Abiotic stress                | Heat shock protein 20 (HSP20)                            | 1.00E-34  |
| T2-L2 | turquoise | Csa1G163140 | -1.401  | 8.89E-03   | Protein synthesis             | Ribosomal protein L1p/L10e family                        | 4.00E-111 |
| T2-L2 | turquoise | Csa1G168900 | 1.214   | 0.028      | Protein synthesis             | Ribosomal protein 5A                                     | 3.00E-100 |
| T2-L2 | turquoise | Csa1G479110 | 1.778   | 9.18E-03   | Not assigned                  | Unknown                                                  |           |
| T2-L2 | turquoise | Csa1G570180 | 3.012   | 5.39E-05   | Transport                     | Heavy metal transport/detoxification superfamily protein | 1.00E-47  |
| T2-L2 | turquoise | Csa1G573590 | 1.361   | 3.54E-05   | Protein synthesis             | Ribosomal protein S25 family protein                     | 7.00E-51  |

Supplementary Table 1 (Continued)

|       |           |             |        |          |                               |                                                                                 |           |
|-------|-----------|-------------|--------|----------|-------------------------------|---------------------------------------------------------------------------------|-----------|
| T2-L2 | turquoise | Csa1G574950 | 1.58   | 0.014    | Biotic stress                 | Receptor like protein 52                                                        | 4.00E-80  |
| T2-L2 | turquoise | Csa1G575160 | 1.173  | 0.027    | Transcription factor          | SNF7 family protein                                                             | 1.00E-105 |
| T2-L2 | turquoise | Csa1G586750 | 2.496  | 2.83E-05 | Protein degradation           | Metallopeptidase M24 family protein                                             | 3.00E-172 |
|       |           |             |        |          | Protein                       |                                                                                 |           |
| T2-L2 | turquoise | Csa1G589720 | 2.792  | 7.37E-03 | postranslational modification | AGC (cAMP-dependent, cGMP-dependent and protein kinase C) kinase family protein | 2.00E-235 |
|       |           |             |        |          | Redox                         |                                                                                 |           |
| T2-L2 | turquoise | Csa1G604040 | 2.041  | 0.037    |                               | L-ascorbate oxidase precursor (ASO)                                             | 0         |
| T2-L2 | turquoise | Csa1G611290 | 1.417  | 0.014    | Miscellaneous                 | Beta glucosidase 15 (BGLU15)                                                    | 2.00E-187 |
| T2-L2 | turquoise | Csa1G629740 | -1.618 | 1.21E-03 | Cell wall                     | fasciclin-like arabinogalactan-protein precursor 17 (Fla17)                     | 3.00E-199 |
| T2-L2 | turquoise | Csa2G000570 | 1.314  | 6.05E-03 | Protein synthesis             | Ribosomal L28e protein family                                                   | 1.00E-65  |
| T2-L2 | turquoise | Csa2G000600 | 1.391  | 6.47E-04 | Protein synthesis             | Ribosomal protein L31e family protein                                           | 4.00E-59  |
| T2-L2 | turquoise | Csa2G000770 | 1.822  | 1.68E-04 | Cell organization             | Profilin 3 (PRF3)                                                               | 3.00E-68  |
| T2-L2 | turquoise | Csa2G012710 | 1.521  | 3.62E-04 | Transcription factor          | NOP56-like pre RNA processing ribonucleoprotein                                 | 1.00E-290 |
| T2-L2 | turquoise | Csa2G013290 | 3.167  | 0.042    | Lipid metabolism              | Acyl carrier protein 4 (ACP4)                                                   | 1.00E-37  |
| T2-L2 | turquoise | Csa2G033940 | 1.812  | 3.15E-05 | Signaling                     | Calreticulin 1a (CRT1a)                                                         | 4.00E-216 |
|       |           |             |        |          | Polyamine metabolism          |                                                                                 |           |
| T2-L2 | turquoise | Csa2G036680 | -1.209 | 1.49E-03 |                               | S-adenosylmethionine decarboxylase proenzyme                                    | 7.00E-136 |
|       |           |             |        |          | Photosynthesis                |                                                                                 |           |
| T2-L2 | turquoise | Csa2G145880 | -1.522 | 4.76E-03 |                               | Serine hydroxymethyltransferase 4 (SHM4)                                        | 2.00E-263 |
| T2-L2 | turquoise | Csa2G193310 | 1.498  | 6.85E-06 | Protein synthesis             | Ribosomal protein S15                                                           | 1.00E-75  |
| T2-L2 | turquoise | Csa2G222050 | 1.332  | 1.62E-03 | Not assigned                  | RmlC-like cupins superfamily protein                                            | 2.00E-88  |
| T2-L2 | turquoise | Csa2G285350 | 1.262  | 0.046    | Protein synthesis             | Translation protein SH3-like family protein                                     | 5.00E-71  |
| T2-L2 | turquoise | Csa2G302060 | 1.523  | 4.38E-07 | Protein synthesis             | Ribosomal protein L10 protein                                                   | 9.00E-82  |
|       |           |             |        |          | Secondary metabolism          |                                                                                 |           |
| T2-L2 | turquoise | Csa2G433350 | -2.293 | 0.043    |                               | 4-coumarate-CoA ligase 2 (4CL2)                                                 | 1.00E-187 |
|       |           |             |        |          | Lipid metabolism              |                                                                                 |           |
| T2-L2 | turquoise | Csa3G002400 | 7.592  | 0.017    |                               | AMP-dependent synthetase and ligase family protein                              | 4.00E-137 |
| T2-L2 | turquoise | Csa3G002750 | 5.719  | 4.24E-05 | Biotic stress                 | Thaumatococcus-like protein 1                                                   | 2.00E-166 |
| T2-L2 | turquoise | Csa3G019340 | 4.954  | 6.70E-03 | Lipid metabolism              | Alpha/beta-hydrolases superfamily protein                                       | 5.00E-77  |
|       |           |             |        |          | C1-metabolism                 |                                                                                 |           |
| T2-L2 | turquoise | Csa3G044520 | -1.737 | 0.015    |                               | Ribonuclease E inhibitor RraA/Dimethylmenaquinone methyltransferase             | 2.00E-72  |
|       |           |             |        |          | Protein synthesis             |                                                                                 |           |
| T2-L2 | turquoise | Csa3G077610 | 1.426  | 3.95E-03 |                               | Translation initiation factor SUI family protein                                | 9.00E-54  |
| T2-L2 | turquoise | Csa3G117960 | 1.532  | 9.68E-12 | Development                   | Squamosa promoter binding protein-like 10 (SPL10)                               | 1.00E-95  |
| T2-L2 | turquoise | Csa3G118140 | 1.413  | 9.80E-05 | Protein synthesis             | Ribosomal protein S6                                                            | 7.00E-134 |
| T2-L2 | turquoise | Csa3G122460 | -6.667 | 5.69E-04 | Not assigned                  | Unknown                                                                         | 5.00E-18  |
| T2-L2 | turquoise | Csa3G134910 | 1.136  | 6.18E-03 | Not assigned                  | Unknown                                                                         | 3.00E-46  |
| T2-L2 | turquoise | Csa3G134930 | 1.756  | 1.64E-04 | Protein synthesis             | Ribosomal protein L14                                                           | 4.00E-63  |
| T2-L2 | turquoise | Csa3G135010 | 1.319  | 0.028    | Protein synthesis             | Ribosomal protein L30/L7 family protein                                         | 6.00E-125 |

Supplementary Table 1 (Continued)

|       |           |             |        |          |                                        |                                                                         |           |
|-------|-----------|-------------|--------|----------|----------------------------------------|-------------------------------------------------------------------------|-----------|
| T2-L2 | turquoise | Csa3G149910 | -2.523 | 0.033    | Not assigned                           | DUF679                                                                  | 6.00E-20  |
| T2-L2 | turquoise | Csa3G152090 | 1.515  | 5.67E-05 | Redox                                  | Thioredoxin superfamily protein                                         | 2.00E-39  |
| T2-L2 | turquoise | Csa3G183920 | -1.907 | 1.38E-12 | Secondary metabolism                   | Beta-hydroxylase 1 (BETA-OHASE1)                                        | 4.00E-161 |
| T2-L2 | turquoise | Csa3G214020 | -1.725 | 6.57E-03 | Not assigned                           | Maternal effect embryo arrest 9 (MEE9)                                  | 1.00E-56  |
| T2-L2 | turquoise | Csa3G403980 | 1.33   | 6.47E-03 | RNA binding                            | RNA-binding (RRM/RBD/RNP motifs) family protein                         | 7.00E-46  |
| T2-L2 | turquoise | Csa3G483830 | -1.282 | 7.34E-04 | Photosynthesis                         | Photosystem I subunit H-1                                               | 6.00E-67  |
| T2-L2 | turquoise | Csa3G639040 | 1.71   | 0.016    | Protein synthesis                      | Stress response suppressor 1 (STRS1)                                    | 1.00E-213 |
| T2-L2 | turquoise | Csa3G653380 | 1.422  | 5.67E-08 | Protein synthesis                      | Zinc-binding ribosomal protein family protein                           | 2.00E-57  |
| T2-L2 | turquoise | Csa3G653460 | 1.642  | 1.62E-03 | Protein synthesis                      | Nucleolin-like 2 (NUC-L2)                                               | 1.00E-162 |
| T2-L2 | turquoise | Csa3G698560 | 1.52   | 5.30E-04 | Protein synthesis                      | Ribosomal protein L6 family protein                                     | 3.00E-111 |
| T2-L2 | turquoise | Csa3G710180 | 2.47   | 0.02     | Not assigned                           | Unknown                                                                 | 1.00E-37  |
| T2-L2 | turquoise | Csa3G733320 | 2.068  | 4.83E-03 | Biodegradation of xenobiotic           | Glyoxal oxidase-related protein                                         | 1.00E-258 |
| T2-L2 | turquoise | Csa3G748210 | 1.46   | 9.83E-09 | Protein synthesis                      | Ribosomal protein L24e family protein                                   | 3.00E-82  |
| T2-L2 | turquoise | Csa3G776970 | 1.638  | 2.18E-04 | TCA                                    | Alpha carbonic anhydrase 1 (CAH1)                                       | 4.00E-81  |
| T2-L2 | turquoise | Csa3G855430 | 1.847  | 0.019    | Miscellaneous                          | O-Glycosyl hydrolases family 17 protein                                 | 1.00E-162 |
| T2-L2 | turquoise | Csa3G895680 | 3.397  | 0.026    | Transcription factor                   | Apetala2/Ethylene-responsive element binding protein family             | 2.00E-56  |
| T2-L2 | turquoise | Csa3G914560 | 1.451  | 1.63E-03 | RNA binding                            | Hyaluronan/mRNA binding family                                          | 2.00E-128 |
| T2-L2 | turquoise | Csa4G004870 | 1.754  | 4.35E-04 | Not assigned                           | Unknown                                                                 | 8.00E-34  |
| T2-L2 | turquoise | Csa4G025120 | -1.865 | 0.027    | Not assigned                           | Unknown                                                                 | 3.00E-50  |
| T2-L2 | turquoise | Csa4G052080 | 3.146  | 0.035    | Not assigned                           | Unknown                                                                 | 1.00E-08  |
| T2-L2 | turquoise | Csa4G091870 | 3.269  | 1.43E-04 | Secondary metabolism                   | 2-oxoglutarase (2OG) and Fe(II)-dependent oxygenase superfamily protein | 1.00E-144 |
| T2-L2 | turquoise | Csa4G152270 | -4.114 | 1.13E-06 | Not assigned                           | Unknown                                                                 |           |
| T2-L2 | turquoise | Csa4G269770 | 2.17   | 0.047    | Protein posttranslational modification | Protein kinase 2B (APK2B)                                               | 1.00E-153 |
| T2-L2 | turquoise | Csa4G290160 | 1.607  | 0.011    | Protein posttranslational modification | Receptor-like protein kinase 1 (RLK1)                                   | 4.00E-27  |
| T2-L2 | turquoise | Csa4G297420 | 2.307  | 0.037    | Not assigned                           | Cysteine/Histidine-rich C1 domain family protein                        | 4.00E-47  |
| T2-L2 | turquoise | Csa4G307390 | -2.045 | 0.022    | Cell organization                      | Tubulin beta chain 3                                                    | 5.00E-256 |
| T2-L2 | turquoise | Csa4G333620 | -2.238 | 1.75E-03 | Lipid metabolism                       | Lipid-transfer protein 6 (LTP6)                                         | 2.00E-29  |
| T2-L2 | turquoise | Csa4G431960 | 3.195  | 0        | Protein targeting                      | Sigma factor binding protein 1 (SIB1)                                   | 2.00E-14  |

Supplementary Table 1 (Continued)

|       |           |             |        |          |                                             |                                                                     |           |
|-------|-----------|-------------|--------|----------|---------------------------------------------|---------------------------------------------------------------------|-----------|
| T2-L2 | turquoise | Csa4G641690 | 1.538  | 0.01     | Transcription factor                        | MYB domain protein 77 (MYB77)                                       | 1.00E-72  |
| T2-L2 | turquoise | Csa4G651970 | 1.399  | 3.03E-08 | Protein synthesis                           | Eukaryotic translation initiation factor 5A-2 (eIF-5A-2)            | 2.00E-85  |
| T2-L2 | turquoise | Csa5G097970 | 3.156  | 6.39E-05 | Not assigned                                | Unknown                                                             | 5.00E-12  |
| T2-L2 | turquoise | Csa5G153020 | 1.177  | 0.016    | Transport                                   | Plasma membrane intrinsic protein 1;4 (PIP1;4)                      | 2.00E-147 |
| T2-L2 | turquoise | Csa5G160150 | -2.457 | 1.80E-06 | Miscellaneous                               | Plant invertase/pectin methylesterase inhibitor superfamily protein | 1.00E-102 |
| T2-L2 | turquoise | Csa5G168920 | 2.675  | 0.026    | Signaling                                   | Leucine-rich repeat receptor -like protein kinase family protein    | 3.00E-93  |
| T2-L2 | turquoise | Csa5G171160 | 1.599  | 1.44E-04 | Protein synthesis                           | Ribosomal protein S10p/S20e family protein                          | 2.00E-59  |
| T2-L2 | turquoise | Csa5G174560 | -1.419 | 9.38E-06 | Abiotic stress                              | BCL-2-associated athaogene 3 (BAG3)                                 | 3.00E-93  |
| T2-L2 | turquoise | Csa5G180850 | 1.312  | 0.05     | Protein synthesis                           | Ribosomal protein L23AA                                             | 6.00E-73  |
| T2-L2 | turquoise | Csa5G182730 | -1.5   | 5.58E-08 | Photosynthesis                              | RuBisCO activase (RA)                                               | 1.00E-204 |
| T2-L2 | turquoise | Csa5G320430 | -2.045 | 3.44E-07 | Secondary metabolism                        | Phytoene synthase (PSY)                                             | 5.00E-232 |
| T2-L2 | turquoise | Csa5G409620 | 1.474  | 2.76E-05 | Protein synthesis                           | Ribosomal protein L7Ae/L30e/S12e/Gadd45 family protein              | 9.00E-54  |
| T2-L2 | turquoise | Csa5G434550 | 14.58  | 5.36E-03 | Transcription factor                        | Response regulator 3                                                | 7.00E-57  |
| T2-L2 | turquoise | Csa5G523190 | 5.13   | 2.26E-05 | Redox                                       | Glutaredoxin family protein                                         | 9.00E-41  |
| T2-L2 | turquoise | Csa5G606660 | 1.869  | 0.037    | Miscellaneous                               | Carbohydrate-binding X8 domain superfamily protein                  | 9.00E-53  |
| T2-L2 | turquoise | Csa5G606810 | 2.66   | 0.024    | Not assigned                                | Unknown                                                             | 3.00E-06  |
| T2-L2 | turquoise | Csa5G610410 | 3.177  | 2.18E-03 | Not assigned                                | Unknown                                                             | 1.00E-08  |
| T2-L2 | turquoise | Csa5G638420 | 1.444  | 6.70E-03 | Protein synthesis                           | Ribosomal protein S19e family protein                               | 3.00E-73  |
| T2-L2 | turquoise | Csa5G645120 | 1.554  | 2.58E-04 | Protein synthesis                           | Ribosomal protein L16p/L10e family protein                          | 2.00E-74  |
| T2-L2 | turquoise | Csa5G649850 | 1.378  | 6.08E-03 | Protein synthesis                           | Ribosomal protein S4                                                | 4.00E-106 |
| T2-L2 | turquoise | Csa5G652280 | 1.316  | 0.029    | Transcription factor                        | MYB domain protein 6 (MYB6)                                         | 4.00E-84  |
| T2-L2 | turquoise | Csa6G001220 | 9.581  | 4.78E-03 | Protein<br>postranslational<br>modification | CBL-interacting protein kinase 1 (CIPK1)                            | 3.00E-169 |
| T2-L2 | turquoise | Csa6G014790 | 1.439  | 2.35E-04 | Protein synthesis                           | R-protein L3B (RPL3B)                                               | 5.00E-214 |
| T2-L2 | turquoise | Csa6G039540 | 1.562  | 6.15E-04 | Transcription factor                        | Constant-like zinc finger family                                    | 2.00E-186 |
| T2-L2 | turquoise | Csa6G055370 | 1.611  | 1.54E-06 | Protein synthesis                           | Ribosomal protein S18C                                              | 2.00E-82  |
| T2-L2 | turquoise | Csa6G077430 | 1.669  | 2.33E-03 | Protein synthesis                           | Ribosomal protein S13                                               | 1.00E-78  |
| T2-L2 | turquoise | Csa6G087710 | 1.582  | 1.49E-06 | Not assigned                                | Ribosome associated membrane RAMP4                                  | 1.00E-26  |
| T2-L2 | turquoise | Csa6G091290 | 1.404  | 7.56E-03 | Protein synthesis                           | Ribosomal protein S27                                               | 7.00E-45  |
| T2-L2 | turquoise | Csa6G108510 | -1.652 | 7.76E-03 | Secondary metabolism                        | Flavanone 3-hydroxylase (F3H)                                       | 4.00E-118 |
| T2-L2 | turquoise | Csa6G133770 | 2.243  | 1.52E-07 | Hormone<br>metabolism                       | Cytokinin response factor 4 (CRF4)                                  | 9.00E-38  |
| T2-L2 | turquoise | Csa6G151720 | 1.43   | 2.74E-09 | Protein synthesis                           | 60S acidic ribosomal protein family                                 |           |

Supplementary Table 1 (Continued)

|       |           |             |         |           |                                  |                                                                                     |           |
|-------|-----------|-------------|---------|-----------|----------------------------------|-------------------------------------------------------------------------------------|-----------|
| T2-L2 | turquoise | Csa6G181560 | -2.765  | 8.71E-05  | Miscellaneous                    | UDP-Glycosyltransferase superfamily protein                                         | 6.00E-145 |
| T2-L2 | turquoise | Csa6G301020 | -1.797  | 8.01E-05  | Signaling                        | Phototropin 2 (PHOT2)                                                               | 0         |
| T2-L2 | turquoise | Csa6G365120 | 1.251   | 1.62E-03  | Not assigned                     | Unknown                                                                             | 5.00E-45  |
| T2-L2 | turquoise | Csa6G405880 | 1.523   | 7.68E-04  | Protein degradation              | Ubiquitin-like protein 5 (UBL5)                                                     | 2.00E-35  |
| T2-L2 | turquoise | Csa6G507370 | -1.596  | 8.96E-03  | Development                      | Senescence 1 (SEN1)                                                                 | 2.00E-80  |
| T2-L2 | turquoise | Csa6G519680 | 1.421   | 2.95E-06  | Protein synthesis                | Ribosomal protein L16B                                                              | 8.00E-96  |
| T2-L2 | turquoise | Csa6G538630 | 1.859   | 0.015     | Co-factor and vitamin metabolism | Molybdenum cofactor sulfurase family protein                                        | 2.00E-128 |
| T2-L2 | turquoise | Csa7G000520 | 125.334 | 9.60E-03  | Transcription factor             | Cryptochrome-interacting basic-helix-loop-helix (CIB1)                              | 1.00E-115 |
| T2-L2 | turquoise | Csa7G027790 | -1.87   | 9.28E-04  | Protein degradation              | Xylem cysteine peptidase 1 (XCP1)                                                   | 1.00E-162 |
| T2-L2 | turquoise | Csa7G108300 | -1.647  | 9.38E-06  | Cell wall                        | Fasciclin-like arabinogalactan-protein 1 (FLA1)                                     | 2.00E-153 |
| T2-L2 | turquoise | Csa7G267900 | -1.375  | 6.08E-03  | Photosynthesis                   | Photosystem II 22kDa protein chloroplast precursor (CP22)                           | 3.00E-110 |
| T2-L2 | turquoise | Csa7G397560 | 1.605   | 7.19E-06  | Protein synthesis                | Ribosomal L22e protein family                                                       | 2.00E-58  |
| T2-L2 | turquoise | Csa7G414420 | 9.428   | 8.95E-05  | Not assigned                     | Unknown                                                                             |           |
| T2-L2 | turquoise | Csa7G432010 | -2.276  | 9.15E-03  | Secondary metabolism             | Cinnamoyl CoA reductase                                                             | 4.00E-168 |
| T2-L2 | turquoise | Csa7G451340 | 2.619   | 1.72E-06  | Miscellaneous                    | Nitrile lyases, berberine bridge enzymes, reticuline oxidases, troponine reductases | 0         |
| T2-L2 | yellow    | Csa5G011650 | -71.384 | 1.63E-03  | Biotic stress                    | ADR1-like 1 (ADR1-L1)                                                               | 8.00E-257 |
| T2-L2 | yellow    | Csa5G603370 | -4.312  | 2.12E-03  | Cell wall                        | RXF12                                                                               | 1.00E-144 |
| T2-L2 | yellow    | Csa3G859730 | -3.412  | 9.15E-03  | Miscellaneous                    | Cytochrome P450, family 82, subfamily C, polypeptide 4 (CYP82C4)                    | 7.00E-83  |
| T2-L2 | yellow    | Csa1G033120 | -3.352  | 4.23E-03  | Transcription factor             | Aspartyl protease family protein                                                    | 6.00E-130 |
| T2-L2 | yellow    | Csa6G312550 | -2.678  | 1.24E-03  | Secondary metabolism             | Phenylalanine ammonia-lyase 1 (PAL2)                                                | 9.00E-30  |
| T2-L2 | yellow    | Csa3G300600 | -1.888  | 2.47E-04  | Miscellaneous                    | Plant invertase/pectin methylesterase inhibitor superfamily protein                 | 4.00E-52  |
| T2-L2 | yellow    | Csa5G623670 | -1.447  | 0.018     | not assigned                     | unknown                                                                             |           |
| T2-L2 | yellow    | Csa2G028500 | 1.232   | 7.93E-03  | Hormone metabolism               | Lipoxygenase 1 (LOX1)                                                               | 0.00E+00  |
| T2-L2 | yellow    | Csa6G324880 | 1.335   | 0.0001866 | Protein targeting                | Importing alpha isoform 2                                                           | 2.00E-281 |
| T2-L2 | yellow    | Csa7G398150 | 1.351   | 0.003881  | Cell wall                        | Expansin B3 (EXPB3)                                                                 | 2.00E-117 |
| T2-L2 | yellow    | Csa4G292970 | 1.368   | 4.84E-03  | Not assigned                     | unknown                                                                             |           |
| T2-L2 | yellow    | Csa6G445150 | 1.382   | 7.92E-04  | Not assigned                     | unknown                                                                             |           |
| T2-L2 | yellow    | Csa7G047420 | 1.409   | 0.031     | cell wall                        | fasciclin-like arabinogalactan-protein 6 (Fla6)                                     | 7.00E-49  |
| T2-L2 | yellow    | Csa6G007450 | 1.436   | 0.003383  | Cell wall                        | MYB domain protein 6 (MYB6)                                                         | 4.00E-80  |
| T2-L2 | yellow    | Csa3G643770 | 1.534   | 0.001616  | Transport                        | Lysine histidine transporter 2 (LHT2)                                               | 5.00E-213 |

Supplementary Table 1 (Continued)

|       |        |             |        |             |                      |                                                                                     |           |
|-------|--------|-------------|--------|-------------|----------------------|-------------------------------------------------------------------------------------|-----------|
| T2-L2 | yellow | Csa5G609110 | 1.732  | 0.004961    | Hormone metabolism   | IAA-Alanine resistant 3 (IAR3)                                                      | 2.00E-173 |
| T2-L2 | yellow | Csa1G590300 | 1.827  | 1.18E-05    | Major CHO metabolism | Hexokinase 2 (HXK2)                                                                 | 7.00E-51  |
| T2-L2 | yellow | Csa6G121970 | 1.841  | 0.02        | hormone metabolism   | EXORDIUM like 5 (EXL5)                                                              | 4.00E-159 |
| T2-L2 | yellow | Csa6G495000 | 1.86   | 1.50E-05    | Not assigned         | unknown                                                                             |           |
| T2-L2 | yellow | Csa3G002330 | 2.238  | 0.007581    | Transcription factor | MYB domain protein 73 (MYB73)                                                       | 1.00E-88  |
| T2-L2 | yellow | Csa3G481240 | 2.483  | 0.000002215 | Cell wall            | Maternal effect embryo arrest 31 (MEE31)                                            | 4.00E-159 |
| T2-L2 | yellow | Csa1G003490 | 2.619  | 0.000001719 | Miscellaneous        | nitrile lyases, berberine bridge enzymes, reticuline oxidases, troponine reductases | 0.00E+00  |
| T2-L2 | yellow | Csa4G000030 | 2.908  | 0.00547     | Hormone metabolism   | S-adenosyl-L-methionine: jasmonic acid carboxyl methyltransferase                   | 0         |
| T2-L2 | yellow | Csa3G850600 | 2.992  | 2.07E-03    | Not assigned         | unknown                                                                             |           |
| T2-L2 | yellow | Csa1G066560 | 3.395  | 0.0001601   | Signaling            | Cystine-rich RLK 29 (CRK29)                                                         | 8.00E-79  |
| T2-L2 | yellow | Csa2G028490 | 3.4    | 0.0002165   | Protein degradation  | Cystein proteinases superfamily protein                                             | 2.00E-168 |
| T2-L2 | yellow | Csa3G665100 | 6.455  | 2.944E-09   | Secondary metabolism | Transparent testa 4 (TT7)                                                           | 9.00E-146 |
| T2-L2 | yellow | Csa1G073810 | 6.575  | 0.002475    | Secondary metabolism | Terpene synthase 14 (TPS14)                                                         | 2.00E-144 |
| T2-L2 | yellow | Csa1G596520 | 6.671  | 1.497E-07   | Glycolysis           | Phenylalanine ammonia-lyase 2 (PAL2)                                                | 0.00E+00  |
| T2-L2 | yellow | Csa3G852600 | 8.469  | 0           | Miscellaneous        | Cytochrome P450 family 82 subfamily C polypeptide 4 (CYP82C4)                       | 8.00E-145 |
| T2-L2 | yellow | Csa2G033340 | 9.201  | 6.89E-03    | Not assigned         | unknown                                                                             |           |
| T2-L2 | yellow | Csa6G127320 | 9.393  | 0.000009377 | Secondary metabolism | MYB domain protein 10 (MYB10)                                                       | 7.00E-51  |
| T2-L2 | yellow | Csa1G066570 | 11.211 | 4.726E-08   | Secondary metabolism | Terpene synthase 14 (TPS14)                                                         | 2.00E-133 |
| T2-L2 | yellow | Csa3G589590 | 12.087 | 1.93E-05    | Not assigned         | unknown                                                                             |           |
| T2-L2 | yellow | Csa6G057160 | 15.701 | 0.00008718  | Hormone metabolism   | UDP-glucosyltransferase 75B1 (UGT75B1)                                              | 3.00E-128 |
| T2-L2 | yellow | Csa1G068570 | 26.653 | 0.001096    | Secondary metabolism | Terpene synthase 14 (TPS14)                                                         | 8.00E-12  |
| T2-L2 | yellow | Csa1G006320 | 2.533  | 2.29E-05    | Biotic stress        | Enhanced disease susceptibility 1 (EDS1)                                            | 2.00E-159 |
| T2-L2 | yellow | Csa1G022490 | -3.352 | 4.23E-03    | Transcription factor | Aspartyl protease family protein                                                    | 3.00E-135 |

Supplementary Table 1 (Continued)

|       |        |             |         |          |                      |                                                                          |           |
|-------|--------|-------------|---------|----------|----------------------|--------------------------------------------------------------------------|-----------|
| T2-L2 | yellow | Csa1G064830 | 3.424   | 0.029    | Signaling            | Cystein-rich receptor like kinase 10 (CRK10)                             |           |
| T2-L2 | yellow | Csa1G065930 | 3.395   | 1.60E-04 | Signaling            | Cystein-rich receptor like kinase 29 (CRK29)                             |           |
| T2-L2 | yellow | Csa1G085390 | 1.609   | 5.43E-03 | Transcription factor | C2H2-like zinc finger protein                                            |           |
| T2-L2 | yellow | Csa1G574970 | 1.827   | 1.18E-05 | Major CHO metabolism | Hexokinase 2 (HXK2)                                                      |           |
| T2-L2 | yellow | Csa2G351740 | 1.399   | 0.013    | Transcription factor | MYB-like transcription factor family protein                             | 8.00E-51  |
| T2-L2 | yellow | Csa2G369060 | 1.582   | 6.50E-03 | Protein synthesis    | Ribosomal protein S6                                                     | 5.00E-133 |
| T2-L2 | yellow | Csa2G369220 | 3.723   | 0.04     | Not assigned         | ENTH/ANTH/VHS superfamily protein                                        | 1.00E-72  |
| T2-L2 | yellow | Csa2G427310 | 2.238   | 7.58E-03 | Transcription factor | MYB domain protein 73 (MYB73)                                            | 1.00E-88  |
| T2-L2 | yellow | Csa3G016990 | 1.432   | 6.40E-03 | Development          | DUF581                                                                   | 7.00E-26  |
| T2-L2 | yellow | Csa3G166350 | -3.315  | 0.017    | Not assigned         | Unknown                                                                  | 2.00E-116 |
| T2-L2 | yellow | Csa3G176260 | -1.888  | 2.47E-04 | Miscellaneous        | Plant invertase/pectin methylesterase inhibitor superfamily protein      | 5.00E-63  |
| T2-L2 | yellow | Csa3G852590 | 8.469   | 0        | Miscellaneous        | Cytochrome P450 family 82 subfamily C polypeptide 4 (CYP82C4)            | 8.00E-145 |
| T2-L2 | yellow | Csa4G056640 | 1.53    | 0.011    | Hormone metabolism   | Nine-cis-epoxycarotenoid dioxygenase 4 (NCED4)                           | 1.00E-249 |
| T2-L2 | yellow | Csa4G280660 | 1.368   | 4.84E-03 | Not assigned         | Unknown                                                                  | 3.00E-31  |
| T2-L2 | yellow | Csa4G638480 | -71.384 | 1.63E-03 | Biotic stress        | Apoptosis defense response1-like 1 (ADR1-L1)                             | 3.00E-292 |
| T2-L2 | yellow | Csa5G097460 | -1.366  | 1.15E-06 | Biotic stress        | P-loop containing nucleotide triphosphate hydrolases superfamily protein | 6.00E-82  |
| T2-L2 | yellow | Csa5G146260 | 3.213   | 0.02     | Protein degradation  | RING/U-box superfamily protein                                           | 8.00E-40  |
| T2-L2 | yellow | Csa5G240140 | -4.312  | 2.12E-03 | Cell wall            | Glycosyl hydrolase superfamily protein                                   | 0         |
| T2-L2 | yellow | Csa5G651640 | 1.436   | 3.38E-03 | Transcription factor | MYB domain protein 6 (MYB6)                                              | 4.00E-80  |
| T2-L2 | yellow | Csa6G147460 | -2.678  | 1.24E-03 | Secondary metabolism | Phenylalanine lyase 4 (PAL4)                                             | 0         |
| T2-L2 | yellow | Csa6G365170 | 1.397   | 2.67E-03 | Protein synthesis    | Ribosomal protein L22p/L17e family protein                               | 2.00E-93  |
| T2-L2 | yellow | Csa6G398200 | 1.382   | 7.92E-04 | Not assigned         | Unknown                                                                  | 9.00E-102 |
| T2-L2 | yellow | Csa6G445170 | 1.436   | 0.012    | Protein synthesis    | Ribosomal protein L11 family protein                                     | 5.00E-85  |
| T2-L2 | yellow | Csa6G493850 | 1.86    | 1.50E-05 | Not assigned         | Unknown                                                                  | 9.00E-136 |



Supplementary Table 1 (Continued)
